# Supplementary material for: Progeria and Aging—Omics Based Comparative Analysis
Source: Biomedicines. 2022 Sep 29;10(10):2440. doi: 10.3390/biomedicines10102440 (PMC9599154; doi:10.3390/biomedicines10102440)
Supplement: Supplementary file 1 [file biomedicines-10-02440-s001.zip › SupplementaryTables.xlsx]

## Sheet: Overview
	Overview	Additional Information
	Table S1: Sample Information	Sample Ids, and general information
	Table S2: Overview Up- and Downregulated DEGs	How many DEGs were upregulated / downregulated for both comparisons (nonagenarians vs. healthy children and HGPS vs. healthy children)
	Table S3: Gene Enrichment Biological Processes Analyses	Biological Processes of the respective DEGs using clusterProfiler (version 4.4.2) with MSigDB (version 7.5.1) common elements using the online tool Venny (https://bioinfogp.cnb.csic.es/tools/venny/ )
	Table S4: Predicted miRNAs	predicted miRNAs of the resepective DEGs using the online tool miRNet (https://www.mirnet.ca/ , version 2.0)
	Table S5: Progeria DEGs (comparison progeria patients and healthy children)	results of our DESeq2 analysis comparing HGPS vs. healthy children (healthy children as base) p-Value 0.5 log2fold change < -1 OR log2fold change >1
	Table S6: Aging DEGs (comparison nonagenarians and healthy children)	results of our DESeq2 analysis comparing nonagenarians vs. healthy children (healthy children as base) p-Value 0.5 log2fold change < -1 OR log2fold change >1

## Sheet: SupplementaryTable01
	Supplementary Table S1. Sample Information.
	Group	Sample ID	Sample Name	Age	Sex
	HGPS	GSM3124699	HGPS_6_1	6yr11mos	female
		GSM3124693	HGPS_8_1	8yr	female
		GSM3124694	HGPS_8_2	8yr	male
		GSM3124701	HGPS_8_3	8yr10mos	male
		GSM3124698	HGPS_8_4	8yr6mos	male
	90s	GSM3124673	90s_90_1	90	male
		GSM3124621	90s_90_2	90	male
		GSM3124622	90s_91	91	male
		GSM3124623	90s_92_1	92	female
		GSM3124676	90s_92_2	92	male
		GSM3124670	90s_94	94	male
		GSM3124624	90s_96	96	male
	Healthy Kid	GSM3124630	Healthy_Kid_6_1	6	male
		GSM3124631	Healthy_Kid_7_2	7	male
		GSM3124632	Healthy_Kid_7_1	7	male
		GSM3124633	Healthy_Kid_8_2	8	male
		GSM3124634	Healthy_Kid_8_1	8	male
		GSM3124635	Healthy_Kid_9_1	9	female

## Sheet: SupplementaryTable02
	Supplementary Table S2. Table S2: Overview Up- and Downregulated DEGs.
		Upregulated DEGs	Downregulated DEGs	Total DEGs
	HGPS vs Kids	332	165	497
	90s vs Kids	1350	1393	2743

## Sheet: SupplementaryTable03
	Supplementary Table S3. Gene Enrichment Biological Processes Analyses.
	160 elements included exclusively in "BP_90svsKids":	132 elements included exclusively in "BP_HGPSvsKids":	2 elements included exclusively in "BP_Common DEGs":
	GOBP_ORGANELLE_FISSION	GOBP_SKIN_EPIDERMIS_DEVELOPMENT	GOBP_ENERGY_HOMEOSTASIS
	GOBP_MITOTIC_NUCLEAR_DIVISION	GOBP_SKIN_DEVELOPMENT	GOBP_TONGUE_DEVELOPMENT
	GOBP_CHROMOSOME_SEGREGATION	GOBP_MOLTING_CYCLE
	GOBP_MITOTIC_SISTER_CHROMATID_SEGREGATION	GOBP_CARDIAC_EPITHELIAL_TO_MESENCHYMAL_TRANSITION	10 common elements in "BP_HGPSvsKids" and "BP_Common DEGs":
	GOBP_SISTER_CHROMATID_SEGREGATION	GOBP_EPITHELIAL_TO_MESENCHYMAL_TRANSITION	GOBP_MESENCHYME_DEVELOPMENT
	GOBP_NUCLEAR_CHROMOSOME_SEGREGATION	GOBP_RESPONSE_TO_BMP	GOBP_MESENCHYMAL_CELL_PROLIFERATION
	GOBP_REGULATION_OF_MITOTIC_CELL_CYCLE	GOBP_HEART_MORPHOGENESIS	GOBP_REGULATION_OF_HAIR_FOLLICLE_DEVELOPMENT
	GOBP_DNA_DEPENDENT_DNA_REPLICATION	GOBP_POSITIVE_REGULATION_OF_MAPK_CASCADE	GOBP_ROOF_OF_MOUTH_DEVELOPMENT
	GOBP_DNA_REPLICATION	GOBP_MUSCLE_TISSUE_DEVELOPMENT	GOBP_POSITIVE_REGULATION_OF_HAIR_FOLLICLE_DEVELOPMENT
	GOBP_POSITIVE_REGULATION_OF_CELL_CYCLE_PROCESS	GOBP_PEPTIDYL_TYROSINE_MODIFICATION	GOBP_EPIDERMIS_DEVELOPMENT
	GOBP_REGULATION_OF_NUCLEAR_DIVISION	GOBP_EYE_MORPHOGENESIS	GOBP_PHOSPHATIDYLINOSITOL_3_KINASE_SIGNALING
	GOBP_MITOTIC_CELL_CYCLE_PHASE_TRANSITION	GOBP_MESENCHYME_MORPHOGENESIS	GOBP_CYTOKINE_MEDIATED_SIGNALING_PATHWAY
	GOBP_REGULATION_OF_CELL_CYCLE_PHASE_TRANSITION	GOBP_MUSCLE_ORGAN_DEVELOPMENT	GOBP_FEMALE_SEX_DIFFERENTIATION
	GOBP_REGULATION_OF_MITOTIC_NUCLEAR_DIVISION	GOBP_REGULATION_OF_HAIR_CYCLE	GOBP_POSITIVE_REGULATION_OF_NITRIC_OXIDE_SYNTHASE_BIOSYNTHETIC_PROCESS
	GOBP_POSITIVE_REGULATION_OF_CELL_CYCLE	GOBP_REGULATION_OF_PEPTIDYL_TYROSINE_PHOSPHORYLATION
	GOBP_REGULATION_OF_MITOTIC_CELL_CYCLE_PHASE_TRANSITION	GOBP_CELL_SURFACE_RECEPTOR_SIGNALING_PATHWAY_INVOLVED_IN_HEART_DEVELOPMENT	14 common elements in "BP_HGPSvsKids" and "BP_90svsKids":
	GOBP_MICROTUBULE_CYTOSKELETON_ORGANIZATION_INVOLVED_IN_MITOSIS	GOBP_ENDOCARDIAL_CUSHION_FORMATION	GOBP_REGULATION_OF_MORPHOGENESIS_OF_AN_EPITHELIUM
	GOBP_DNA_GEOMETRIC_CHANGE	GOBP_SENSORY_ORGAN_MORPHOGENESIS	GOBP_APPENDAGE_DEVELOPMENT
	GOBP_CELL_CYCLE_G2_M_PHASE_TRANSITION	GOBP_CAMERA_TYPE_EYE_MORPHOGENESIS	GOBP_REGULATION_OF_MORPHOGENESIS_OF_A_BRANCHING_STRUCTURE
	GOBP_CHROMOSOME_SEPARATION	GOBP_EPITHELIAL_TO_MESENCHYMAL_TRANSITION_INVOLVED_IN_ENDOCARDIAL_CUSHION_FORMATION	GOBP_MAMMARY_GLAND_DEVELOPMENT
	GOBP_METAPHASE_ANAPHASE_TRANSITION_OF_CELL_CYCLE	GOBP_CAMERA_TYPE_EYE_DEVELOPMENT	GOBP_TISSUE_REMODELING
	GOBP_NEGATIVE_REGULATION_OF_CELL_CYCLE	GOBP_SENSORY_SYSTEM_DEVELOPMENT	GOBP_DEVELOPMENT_OF_PRIMARY_SEXUAL_CHARACTERISTICS
	GOBP_MEIOTIC_CELL_CYCLE_PROCESS	GOBP_BIOLOGICAL_PHASE	GOBP_SEX_DIFFERENTIATION
	GOBP_DNA_REPLICATION_INITIATION	GOBP_RESPONSE_TO_TUMOR_NECROSIS_FACTOR	GOBP_POSITIVE_REGULATION_OF_OSTEOBLAST_DIFFERENTIATION
	GOBP_REGULATION_OF_CHROMOSOME_SEPARATION	GOBP_ENDOCARDIAL_CUSHION_DEVELOPMENT	GOBP_EXTERNAL_ENCAPSULATING_STRUCTURE_ORGANIZATION
	GOBP_NEGATIVE_REGULATION_OF_CELL_CYCLE_PROCESS	GOBP_EPIDERMIS_MORPHOGENESIS	GOBP_RESPONSE_TO_TRANSFORMING_GROWTH_FACTOR_BETA
	GOBP_POSITIVE_REGULATION_OF_MITOTIC_CELL_CYCLE_PHASE_TRANSITION	GOBP_REGULATION_OF_ANIMAL_ORGAN_MORPHOGENESIS	GOBP_OSSIFICATION
	GOBP_CELL_CYCLE_CHECKPOINT_SIGNALING	GOBP_EMBRYONIC_EYE_MORPHOGENESIS	GOBP_ODONTOGENESIS
	GOBP_REGULATION_OF_CELL_CYCLE_G2_M_PHASE_TRANSITION	GOBP_NEGATIVE_REGULATION_OF_CHONDROCYTE_DIFFERENTIATION	GOBP_NEGATIVE_REGULATION_OF_REPRODUCTIVE_PROCESS
	GOBP_NEGATIVE_REGULATION_OF_CELL_CYCLE_PHASE_TRANSITION	GOBP_ACTIN_CYTOSKELETON_REORGANIZATION	GOBP_PROSTATE_GLAND_MORPHOGENESIS
	GOBP_POSITIVE_REGULATION_OF_MITOTIC_CELL_CYCLE	GOBP_BONE_REMODELING
	GOBP_SPINDLE_ORGANIZATION	GOBP_VASCULAR_PROCESS_IN_CIRCULATORY_SYSTEM	15 common elements in "BP_HGPSvsKids", "BP_90svsKids" and "BP_Common DEGs":
	GOBP_MEIOTIC_CELL_CYCLE	GOBP_POSITIVE_REGULATION_OF_PROTEIN_TYROSINE_KINASE_ACTIVITY	GOBP_MESENCHYMAL_CELL_DIFFERENTIATION
	GOBP_POSITIVE_REGULATION_OF_CELL_CYCLE_PHASE_TRANSITION	GOBP_RENAL_TUBULE_DEVELOPMENT	GOBP_INOSITOL_LIPID_MEDIATED_SIGNALING
	GOBP_MITOTIC_CELL_CYCLE_CHECKPOINT_SIGNALING	GOBP_REGULATION_OF_BODY_FLUID_LEVELS	GOBP_POSITIVE_REGULATION_OF_PHOSPHATIDYLINOSITOL_3_KINASE_SIGNALING
	GOBP_REGULATION_OF_CHROMOSOME_SEGREGATION	GOBP_KIDNEY_EPITHELIUM_DEVELOPMENT	GOBP_GLAND_DEVELOPMENT
	GOBP_DNA_UNWINDING_INVOLVED_IN_DNA_REPLICATION	GOBP_POSITIVE_REGULATION_OF_PEPTIDYL_TYROSINE_PHOSPHORYLATION	GOBP_REGULATION_OF_PHOSPHATIDYLINOSITOL_3_KINASE_SIGNALING
	GOBP_NEGATIVE_REGULATION_OF_MITOTIC_CELL_CYCLE	GOBP_ENDOCARDIAL_CUSHION_MORPHOGENESIS	GOBP_UROGENITAL_SYSTEM_DEVELOPMENT
	GOBP_KINETOCHORE_ORGANIZATION	GOBP_HAIR_FOLLICLE_MATURATION	GOBP_EPITHELIAL_CELL_PROLIFERATION
	GOBP_MITOTIC_SPINDLE_ORGANIZATION	GOBP_METANEPHRIC_RENAL_VESICLE_MORPHOGENESIS	GOBP_MORPHOGENESIS_OF_A_BRANCHING_STRUCTURE
	GOBP_ATTACHMENT_OF_SPINDLE_MICROTUBULES_TO_KINETOCHORE	GOBP_POSITIVE_REGULATION_OF_PROTEIN_KINASE_ACTIVITY	GOBP_EMBRYONIC_ORGAN_DEVELOPMENT
	GOBP_NEGATIVE_REGULATION_OF_MITOTIC_CELL_CYCLE_PHASE_TRANSITION	GOBP_NEGATIVE_REGULATION_OF_HORMONE_SECRETION	GOBP_REGULATION_OF_MESENCHYMAL_CELL_PROLIFERATION
	GOBP_REGULATION_OF_DNA_DEPENDENT_DNA_REPLICATION	GOBP_MUSCLE_ORGAN_MORPHOGENESIS	GOBP_POSITIVE_REGULATION_OF_MESENCHYMAL_CELL_PROLIFERATION
	GOBP_MICROTUBULE_ORGANIZING_CENTER_ORGANIZATION	GOBP_OUTFLOW_TRACT_MORPHOGENESIS	GOBP_REPRODUCTIVE_SYSTEM_DEVELOPMENT
	GOBP_CELL_CYCLE_DNA_REPLICATION	GOBP_CANONICAL_WNT_SIGNALING_PATHWAY	GOBP_CONNECTIVE_TISSUE_DEVELOPMENT
	GOBP_NEGATIVE_REGULATION_OF_NUCLEAR_DIVISION	GOBP_ESTABLISHMENT_OF_PLANAR_POLARITY_OF_EMBRYONIC_EPITHELIUM	GOBP_TRANSMEMBRANE_RECEPTOR_PROTEIN_SERINE_THREONINE_KINASE_SIGNALING_PATHWAY
	GOBP_METAPHASE_PLATE_CONGRESSION	GOBP_NEGATIVE_REGULATION_OF_CARTILAGE_DEVELOPMENT	GOBP_NITRIC_OXIDE_SYNTHASE_BIOSYNTHETIC_PROCESS
	GOBP_CENTROMERE_COMPLEX_ASSEMBLY	GOBP_POSITIVE_REGULATION_OF_KINASE_ACTIVITY
	GOBP_REGULATION_OF_MITOTIC_SISTER_CHROMATID_SEGREGATION	GOBP_CARDIAC_MUSCLE_TISSUE_DEVELOPMENT
	GOBP_NEGATIVE_REGULATION_OF_METAPHASE_ANAPHASE_TRANSITION_OF_CELL_CYCLE	GOBP_PULMONARY_VALVE_MORPHOGENESIS
	GOBP_ESTABLISHMENT_OF_ORGANELLE_LOCALIZATION	GOBP_POSITIVE_REGULATION_OF_CELL_ADHESION
	GOBP_DNA_RECOMBINATION	GOBP_DEVELOPMENT_OF_PRIMARY_FEMALE_SEXUAL_CHARACTERISTICS
	GOBP_REGULATION_OF_CHROMOSOME_ORGANIZATION	GOBP_VASCULAR_TRANSPORT
	GOBP_REGULATION_OF_UBIQUITIN_PROTEIN_LIGASE_ACTIVITY	GOBP_MUSCLE_CELL_DIFFERENTIATION
	GOBP_NEGATIVE_REGULATION_OF_CHROMOSOME_ORGANIZATION	GOBP_CELLULAR_RESPONSE_TO_INTERLEUKIN_1
	GOBP_NEGATIVE_REGULATION_OF_ORGANELLE_ORGANIZATION	GOBP_EPITHELIAL_TUBE_MORPHOGENESIS
	GOBP_CHROMOSOME_LOCALIZATION	GOBP_CELL_CELL_SIGNALING_BY_WNT
	GOBP_REGULATION_OF_DNA_REPLICATION	GOBP_METANEPHROS_DEVELOPMENT
	GOBP_CYTOKINESIS	GOBP_REGULATION_OF_PROTEIN_TYROSINE_KINASE_ACTIVITY
	GOBP_REGULATION_OF_MEIOTIC_CELL_CYCLE	GOBP_REGULATION_OF_CARTILAGE_DEVELOPMENT
	GOBP_POSITIVE_REGULATION_OF_CELL_CYCLE_G2_M_PHASE_TRANSITION	GOBP_PATTERN_SPECIFICATION_PROCESS
	GOBP_MITOTIC_DNA_REPLICATION	GOBP_REGULATION_OF_CHONDROCYTE_DIFFERENTIATION
	GOBP_KINETOCHORE_ASSEMBLY	GOBP_REGULATION_OF_EXTRINSIC_APOPTOTIC_SIGNALING_PATHWAY_VIA_DEATH_DOMAIN_RECEPTORS
	GOBP_DNA_CONFORMATION_CHANGE	GOBP_RENAL_VESICLE_DEVELOPMENT
	GOBP_MITOTIC_METAPHASE_PLATE_CONGRESSION	GOBP_BODY_FLUID_SECRETION
	GOBP_DNA_INTEGRITY_CHECKPOINT_SIGNALING	GOBP_GLIAL_CELL_MIGRATION
	GOBP_POSITIVE_REGULATION_OF_FIBROBLAST_PROLIFERATION	GOBP_REGULATION_OF_WNT_SIGNALING_PATHWAY
	GOBP_REGULATION_OF_CYTOKINESIS	GOBP_CELL_CELL_ADHESION_VIA_PLASMA_MEMBRANE_ADHESION_MOLECULES
	GOBP_DNA_BIOSYNTHETIC_PROCESS	GOBP_REGULATION_OF_COAGULATION
	GOBP_REGULATION_OF_UBIQUITIN_PROTEIN_TRANSFERASE_ACTIVITY	GOBP_ERK1_AND_ERK2_CASCADE
	GOBP_DOUBLE_STRAND_BREAK_REPAIR_VIA_BREAK_INDUCED_REPLICATION	GOBP_REGULATION_OF_FAT_CELL_DIFFERENTIATION
	GOBP_MEIOSIS_I_CELL_CYCLE_PROCESS	GOBP_ACTION_POTENTIAL
	GOBP_ACTIN_FILAMENT_BASED_TRANSPORT	GOBP_STRIATED_MUSCLE_CELL_DIFFERENTIATION
	GOBP_POSITIVE_REGULATION_OF_NUCLEAR_DIVISION	GOBP_HOMOPHILIC_CELL_ADHESION_VIA_PLASMA_MEMBRANE_ADHESION_MOLECULES
	GOBP_DNA_REPLICATION_CHECKPOINT_SIGNALING	GOBP_SALIVARY_GLAND_DEVELOPMENT
	GOBP_REGULATION_OF_DNA_DIRECTED_DNA_POLYMERASE_ACTIVITY	GOBP_CELL_PROLIFERATION_INVOLVED_IN_HEART_MORPHOGENESIS
	GOBP_MALE_SEX_DIFFERENTIATION	GOBP_PULMONARY_VALVE_DEVELOPMENT
	GOBP_RECOMBINATIONAL_REPAIR	GOBP_NEPHRON_DEVELOPMENT
	GOBP_REGULATION_OF_MEIOTIC_NUCLEAR_DIVISION	GOBP_HEART_VALVE_MORPHOGENESIS
	GOBP_FIBROBLAST_PROLIFERATION	GOBP_REGIONALIZATION
	GOBP_FEMALE_MEIOTIC_NUCLEAR_DIVISION	GOBP_CELL_PROLIFERATION_INVOLVED_IN_KIDNEY_DEVELOPMENT
	GOBP_NON_MEMBRANE_BOUNDED_ORGANELLE_ASSEMBLY	GOBP_GLAND_MORPHOGENESIS
	GOBP_REGULATION_OF_REPRODUCTIVE_PROCESS	GOBP_REGULATION_OF_CANONICAL_WNT_SIGNALING_PATHWAY
	GOBP_REGULATION_OF_CELL_DIVISION	GOBP_SYNAPSE_ORGANIZATION
	GOBP_NEGATIVE_REGULATION_OF_CELL_CYCLE_G2_M_PHASE_TRANSITION	GOBP_REGULATION_OF_EPITHELIAL_TO_MESENCHYMAL_TRANSITION
	GOBP_MITOTIC_CYTOKINESIS	GOBP_NOTCH_SIGNALING_INVOLVED_IN_HEART_DEVELOPMENT
	GOBP_ACTIN_FILAMENT_ORGANIZATION	GOBP_REGULATION_OF_COMPLEMENT_DEPENDENT_CYTOTOXICITY
	GOBP_MITOTIC_DNA_INTEGRITY_CHECKPOINT_SIGNALING	GOBP_METANEPHRIC_NEPHRON_DEVELOPMENT
	GOBP_DNA_STRAND_ELONGATION_INVOLVED_IN_DNA_REPLICATION	GOBP_POSITIVE_REGULATION_OF_BMP_SIGNALING_PATHWAY
	GOBP_MEIOTIC_SPINDLE_ORGANIZATION	GOBP_COCHLEA_MORPHOGENESIS
	GOBP_POSITIVE_REGULATION_OF_UBIQUITIN_PROTEIN_LIGASE_ACTIVITY	GOBP_CARDIOCYTE_DIFFERENTIATION
	GOBP_ESTABLISHMENT_OF_MITOTIC_SPINDLE_LOCALIZATION	GOBP_REGULATION_OF_BMP_SIGNALING_PATHWAY
	GOBP_AGING	GOBP_WOUND_HEALING
	GOBP_NEGATIVE_REGULATION_OF_COLD_INDUCED_THERMOGENESIS	GOBP_SECRETION_BY_TISSUE
	GOBP_REGULATION_OF_ACTIN_FILAMENT_BASED_PROCESS	GOBP_SEMI_LUNAR_VALVE_DEVELOPMENT
	GOBP_DOUBLE_STRAND_BREAK_REPAIR	GOBP_METANEPHRIC_NEPHRON_MORPHOGENESIS
	GOBP_AMEBOIDAL_TYPE_CELL_MIGRATION	GOBP_BRANCHING_INVOLVED_IN_PROSTATE_GLAND_MORPHOGENESIS
	GOBP_FOREBRAIN_DEVELOPMENT	GOBP_GLOMERULAR_MESANGIAL_CELL_PROLIFERATION
	GOBP_MEIOTIC_CHROMOSOME_SEGREGATION	GOBP_MESENCHYMAL_TO_EPITHELIAL_TRANSITION_INVOLVED_IN_METANEPHROS_MORPHOGENESIS
	GOBP_MEIOTIC_CELL_CYCLE_PHASE_TRANSITION	GOBP_THROMBIN_ACTIVATED_RECEPTOR_SIGNALING_PATHWAY
	GOBP_SPINDLE_MIDZONE_ASSEMBLY	GOBP_STEM_CELL_DIFFERENTIATION
	GOBP_MULTI_MULTICELLULAR_ORGANISM_PROCESS	GOBP_POSITIVE_REGULATION_OF_CANONICAL_WNT_SIGNALING_PATHWAY
	GOBP_POSITIVE_REGULATION_OF_UBIQUITIN_PROTEIN_TRANSFERASE_ACTIVITY	GOBP_NEUROMUSCULAR_JUNCTION_DEVELOPMENT
	GOBP_POSITIVE_REGULATION_OF_MITOTIC_NUCLEAR_DIVISION	GOBP_CELL_DIFFERENTIATION_INVOLVED_IN_EMBRYONIC_PLACENTA_DEVELOPMENT
	GOBP_FEMALE_GAMETE_GENERATION	GOBP_EMBRYONIC_CAMERA_TYPE_EYE_MORPHOGENESIS
	GOBP_EXTRACELLULAR_MATRIX_DISASSEMBLY	GOBP_SECONDARY_PALATE_DEVELOPMENT
	GOBP_POSITIVE_REGULATION_OF_ORGANELLE_ORGANIZATION	GOBP_EAR_DEVELOPMENT
	GOBP_ANATOMICAL_STRUCTURE_HOMEOSTASIS	GOBP_CELL_ADHESION_MEDIATED_BY_INTEGRIN
	GOBP_CYTOSKELETON_DEPENDENT_CYTOKINESIS	GOBP_LUNG_ALVEOLUS_DEVELOPMENT
	GOBP_FEMALE_MEIOSIS_I	GOBP_NEPHRON_EPITHELIUM_DEVELOPMENT
	GOBP_REGULATION_OF_ATTACHMENT_OF_SPINDLE_MICROTUBULES_TO_KINETOCHORE	GOBP_EXTRINSIC_APOPTOTIC_SIGNALING_PATHWAY
	GOBP_PROTEIN_LOCALIZATION_TO_CHROMOSOME	GOBP_HEART_VALVE_DEVELOPMENT
	GOBP_REGULATION_OF_CYCLIN_DEPENDENT_PROTEIN_KINASE_ACTIVITY	GOBP_SKELETAL_MUSCLE_CELL_DIFFERENTIATION
	GOBP_POSITIVE_REGULATION_OF_CELL_CYCLE_G1_S_PHASE_TRANSITION	GOBP_AXIS_ELONGATION
	GOBP_ZINC_ION_HOMEOSTASIS	GOBP_CARDIAC_NEURAL_CREST_CELL_DEVELOPMENT_INVOLVED_IN_OUTFLOW_TRACT_MORPHOGENESIS
	GOBP_MITOTIC_G2_DNA_DAMAGE_CHECKPOINT_SIGNALING	GOBP_ESTABLISHMENT_OF_PLANAR_POLARITY_INVOLVED_IN_NEURAL_TUBE_CLOSURE
	GOBP_SIGNAL_TRANSDUCTION_IN_RESPONSE_TO_DNA_DAMAGE	GOBP_GLYCINE_TRANSPORT
	GOBP_EMBRYONIC_APPENDAGE_MORPHOGENESIS	GOBP_POSITIVE_REGULATION_OF_ERK1_AND_ERK2_CASCADE
	GOBP_PROTEIN_DEPOLYMERIZATION	GOBP_SKELETAL_MUSCLE_ORGAN_DEVELOPMENT
	GOBP_MAMMARY_GLAND_EPITHELIUM_DEVELOPMENT	GOBP_MUSCLE_CONTRACTION
	GOBP_CENTROSOME_DUPLICATION	GOBP_NEGATIVE_REGULATION_OF_SECRETION
	GOBP_MITOTIC_G2_M_TRANSITION_CHECKPOINT	GOBP_RESPONSE_TO_INTERLEUKIN_1
	GOBP_EMBRYONIC_SKELETAL_SYSTEM_DEVELOPMENT	GOBP_TRABECULA_MORPHOGENESIS
	GOBP_PROTEIN_LOCALIZATION_TO_CONDENSED_CHROMOSOME	GOBP_ENDOTHELIAL_CELL_APOPTOTIC_PROCESS
	GOBP_STRESS_RESPONSE_TO_METAL_ION	GOBP_REGULATION_OF_ANATOMICAL_STRUCTURE_SIZE
	GOBP_SPINDLE_LOCALIZATION	GOBP_DIGESTIVE_SYSTEM_DEVELOPMENT
	GOBP_NEGATIVE_REGULATION_OF_CELL_CELL_ADHESION_MEDIATED_BY_CADHERIN	GOBP_COMPLEMENT_DEPENDENT_CYTOTOXICITY
	GOBP_POSITIVE_REGULATION_OF_MEMBRANE_DEPOLARIZATION	GOBP_NEUROTRANSMITTER_GATED_ION_CHANNEL_CLUSTERING
	GOBP_SPINDLE_ELONGATION	GOBP_POSITIVE_REGULATION_OF_EXTRINSIC_APOPTOTIC_SIGNALING_PATHWAY_VIA_DEATH_DOMAIN_RECEPTORS
	GOBP_DNA_DEPENDENT_DNA_REPLICATION_MAINTENANCE_OF_FIDELITY	GOBP_REGULATION_OF_SECONDARY_METABOLIC_PROCESS
	GOBP_PROSTATE_GLAND_DEVELOPMENT	GOBP_PHARYNGEAL_SYSTEM_DEVELOPMENT
	GOBP_TEMPERATURE_HOMEOSTASIS	GOBP_REGULATION_OF_OSSIFICATION
	GOBP_PROTEIN_LOCALIZATION_TO_CHROMOSOME_CENTROMERIC_REGION
	GOBP_REGULATION_OF_PROTEIN_SERINE_THREONINE_KINASE_ACTIVITY
	GOBP_NEGATIVE_REGULATION_OF_GROWTH
	GOBP_REGULATION_OF_PROTEIN_MODIFICATION_BY_SMALL_PROTEIN_CONJUGATION_OR_REMOVAL
	GOBP_ATTACHMENT_OF_MITOTIC_SPINDLE_MICROTUBULES_TO_KINETOCHORE
	GOBP_DETOXIFICATION_OF_COPPER_ION
	GOBP_FORMATION_OF_EXTRACHROMOSOMAL_CIRCULAR_DNA
	GOBP_NEGATIVE_REGULATION_OF_DNA_DEPENDENT_DNA_REPLICATION
	GOBP_REGULATION_OF_GTP_BINDING
	GOBP_RESPONSE_TO_UV
	GOBP_CELLULAR_RESPONSE_TO_RADIATION
	GOBP_KIDNEY_MORPHOGENESIS
	GOBP_ANIMAL_ORGAN_REGENERATION
	GOBP_REGULATION_OF_WOUND_HEALING
	GOBP_OSTEOBLAST_DIFFERENTIATION
	GOBP_EMBRYONIC_CAMERA_TYPE_EYE_FORMATION
	GOBP_TELOMERIC_LOOP_DISASSEMBLY
	GOBP_TRANSFORMING_GROWTH_FACTOR_BETA_ACTIVATION
	GOBP_BLASTOCYST_GROWTH
	GOBP_MITOCHONDRIAL_DEPOLARIZATION
	GOBP_REGULATION_OF_CELL_CELL_ADHESION_MEDIATED_BY_CADHERIN
	GOBP_CELLULAR_COMPONENT_DISASSEMBLY
	GOBP_APPENDAGE_MORPHOGENESIS
	GOBP_RESPONSE_TO_CADMIUM_ION
	GOBP_DEOXYRIBONUCLEOTIDE_BIOSYNTHETIC_PROCESS
	GOBP_REGULATION_OF_EXTRACELLULAR_MATRIX_DISASSEMBLY
	GOBP_REGULATION_OF_TRANSMEMBRANE_RECEPTOR_PROTEIN_SERINE_THREONINE_KINASE_SIGNALING_PATHWAY
	GOBP_POSITIVE_REGULATION_OF_EXTRACELLULAR_MATRIX_ORGANIZATION

## Sheet: SupplementaryTable04
	Supplementary Figure S4. Predicted miRNAs.
	predicted miRNAs 90s vs children	predicted miRNAs progeria vs children	predicted miRNAs common DEGs
	hsa-let-7b-5p	hsa-let-7b-5p	hsa-let-7b-5p
	hsa-mir-100	hsa-mir-100-5p	hsa-mir-100-5p
	hsa-mir-100-5p	hsa-mir-10b-5p	hsa-mir-10b-5p
	hsa-mir-10b	hsa-mir-124	hsa-mir-124-3p
	hsa-mir-10b-5p	hsa-mir-124-3p	hsa-mir-1246
	hsa-mir-124	hsa-mir-1246	hsa-mir-125b
	hsa-mir-124-3p	hsa-mir-125b	hsa-mir-125b-5p
	hsa-mir-1246	hsa-mir-125b-5p	hsa-mir-126-3p
	hsa-mir-125b	hsa-mir-126-3p	hsa-mir-126-5p
	hsa-mir-125b-5p	hsa-mir-126-5p	hsa-mir-130b-3p
	hsa-mir-126*	hsa-mir-130b-3p	hsa-mir-138-5p
	hsa-mir-126-3p	hsa-mir-138-5p	hsa-mir-145-5p
	hsa-mir-126-5p	hsa-mir-145-5p	hsa-mir-155-5p
	hsa-mir-130b-3p	hsa-mir-155	hsa-mir-17-5p
	hsa-mir-138-5p	hsa-mir-155-5p	hsa-mir-181a-5p
	hsa-mir-145	hsa-mir-17-5p	hsa-mir-181b-5p
	hsa-mir-145-5p	hsa-mir-181a-5p	hsa-mir-200a-3p
	hsa-mir-155	hsa-mir-181b-5p	hsa-mir-205-5p
	hsa-mir-155-5p	hsa-mir-200a-3p	hsa-mir-20a-5p
	hsa-mir-17	hsa-mir-205-5p	hsa-mir-218-5p
	hsa-mir-17-5p	hsa-mir-20a-5p	hsa-mir-221
	hsa-mir-181a	hsa-mir-218-5p	hsa-mir-221-3p
	hsa-mir-181a-5p	hsa-mir-221	hsa-mir-222
	hsa-mir-181b	hsa-mir-221-3p	hsa-mir-222-3p
	hsa-mir-181b-5p	hsa-mir-222	hsa-mir-22-3p
	hsa-mir-200a	hsa-mir-222-3p	hsa-mir-224-5p
	hsa-mir-200a-3p	hsa-mir-22-3p	hsa-mir-24-3p
	hsa-mir-205	hsa-mir-224-5p	hsa-mir-26a-5p
	hsa-mir-205-5p	hsa-mir-24-3p	hsa-mir-27b-3p
	hsa-mir-20a	hsa-mir-26a-5p	hsa-mir-302b-3p
	hsa-mir-20a-5p	hsa-mir-27b-3p	hsa-mir-31-5p
	hsa-mir-218	hsa-mir-302b-3p	hsa-mir-328-3p
	hsa-mir-218-5p	hsa-mir-31-5p	hsa-mir-372-3p
	hsa-mir-22	hsa-mir-328-3p	hsa-mir-675-5p
	hsa-mir-221	hsa-mir-372-3p	hsa-mir-941
	hsa-mir-221-3p	hsa-mir-675-5p	hsa-mir-99a-5p
	hsa-mir-222	hsa-mir-941	hsa-mir-99b-5p
	hsa-mir-222-3p	hsa-mir-99a-5p
	hsa-mir-22-3p	hsa-mir-99b-5p
	hsa-mir-224-5p
	hsa-mir-24
	hsa-mir-24-3p
	hsa-mir-26a
	hsa-mir-26a-5p
	hsa-mir-27b
	hsa-mir-27b-3p
	hsa-mir-302b-3p
	hsa-mir-31-5p
	hsa-mir-328-3p
	hsa-mir-372-3p
	hsa-mir-675-5p
	hsa-mir-941
	hsa-mir-99a
	hsa-mir-99a-5p
	hsa-mir-99b-5p

## Sheet: SupplementaryTable05
ensgene	baseMean	log2FoldChange	lfcSE	pvalue	padj	test	entrezgene_id	ensembl_gene_id	gene_biotype	chromosome_name	start_position	end_position	strand	external_gene_name	description
ENSG00000000971.16	313.171	2.38695	0.654637	1.17115e-05	0.00110817	TRUE	3075	ENSG00000000971	protein_coding	1	196652043	196747504	1	CFH	complement factor H [Source:HGNC Symbol;Acc:HGNC:4883]
ENSG00000001617.12	241.048	1.79767	0.377734	9.86177e-08	2.76063e-05	TRUE	6405	ENSG00000001617	protein_coding	3	50155045	50189075	1	SEMA3F	semaphorin 3F [Source:HGNC Symbol;Acc:HGNC:10728]
ENSG00000002745.13	52.1669	3.62771	0.920925	3.55596e-06	0.000446434	TRUE	51384	ENSG00000002745	protein_coding	7	121325367	121341104	1	WNT16	Wnt family member 16 [Source:HGNC Symbol;Acc:HGNC:16267]
ENSG00000003436.16	616.098	1.34116	0.585941	0.000789025	0.0231645	TRUE	7035	ENSG00000003436	protein_coding	2	187464230	187565760	-1	TFPI	tissue factor pathway inhibitor [Source:HGNC Symbol;Acc:HGNC:11760]
ENSG00000003989.18	35.8193	5.42901	1.9166	9.61737e-05	0.00535035	TRUE	6542	ENSG00000003989	protein_coding	8	17497088	17570573	1	SLC7A2	solute carrier family 7 member 2 [Source:HGNC Symbol;Acc:HGNC:11060]
ENSG00000006468.14	281.055	-1.91473	0.552592	1.6836e-05	0.00143522	TRUE	2115	ENSG00000006468	protein_coding	7	13891229	13991425	-1	ETV1	ETS variant transcription factor 1 [Source:HGNC Symbol;Acc:HGNC:3490]
ENSG00000006606.9	42.0971	-1.29205	0.526043	0.000438987	0.0156516	TRUE	10344	ENSG00000006606	protein_coding	7	75769533	75789896	-1	CCL26	C-C motif chemokine ligand 26 [Source:HGNC Symbol;Acc:HGNC:10625]
ENSG00000007944.15	60.8065	1.02793	0.552664	0.00209035	0.045342	TRUE	29116	ENSG00000007944	protein_coding	6	16129086	16148248	1	MYLIP	myosin regulatory light chain interacting protein [Source:HGNC Symbol;Acc:HGNC:21155]
ENSG00000010610.10	63.1686	2.91047	0.824478	1.76223e-05	0.00148998	TRUE	920	ENSG00000010610	protein_coding	12	6786858	6820799	1	CD4	CD4 molecule [Source:HGNC Symbol;Acc:HGNC:1678]
ENSG00000013588.9	742.647	1.82438	0.778934	0.000633461	0.019822	TRUE	9052	ENSG00000013588	protein_coding	12	12891559	12917937	1	GPRC5A	G protein-coupled receptor class C group 5 member A [Source:HGNC Symbol;Acc:HGNC:9836]
ENSG00000016402.14	11.6551	2.69718	1.2883	0.00115913	0.0307705	TRUE	53832	ENSG00000016402	protein_coding	6	136999971	137045180	-1	IL20RA	interleukin 20 receptor subunit alpha [Source:HGNC Symbol;Acc:HGNC:6003]
ENSG00000017483.16	1214.69	-1.05978	0.432574	0.000473096	0.0164432	TRUE	92745	ENSG00000017483	protein_coding	X	48458537	48470260	-1	SLC38A5	solute carrier family 38 member 5 [Source:HGNC Symbol;Acc:HGNC:18070]
ENSG00000019991.18	27.2261	2.9339	0.744063	3.23961e-06	0.000416823	TRUE	3082	ENSG00000019991	protein_coding	7	81699010	81770438	-1	HGF	hepatocyte growth factor [Source:HGNC Symbol;Acc:HGNC:4893]
ENSG00000021645.20	67.2022	2.50913	1.15906	0.000786041	0.0231645	TRUE	9369	ENSG00000021645	protein_coding	14	78170373	79868291	1	NRXN3	neurexin 3 [Source:HGNC Symbol;Acc:HGNC:8010]
ENSG00000023445.16	61.8109	3.68745	0.608619	7.91507e-11	7.12872e-08	TRUE	330	ENSG00000023445	protein_coding	11	102317450	102339403	1	BIRC3	baculoviral IAP repeat containing 3 [Source:HGNC Symbol;Acc:HGNC:591]
ENSG00000029534.21	164.053	1.91291	0.679389	0.000175071	0.0083562	TRUE	286	ENSG00000029534	protein_coding	8	41653220	41896762	-1	ANK1	ankyrin 1 [Source:HGNC Symbol;Acc:HGNC:492]
ENSG00000038945.15	11.3458	2.66102	1.0728	0.000432852	0.0155399	TRUE	4481	ENSG00000038945	protein_coding	8	16107878	16567490	-1	MSR1	macrophage scavenger receptor 1 [Source:HGNC Symbol;Acc:HGNC:7376]
ENSG00000039068.20	15.5935	2.91668	0.653025	3.7517e-07	7.8961e-05	TRUE	999	ENSG00000039068	protein_coding	16	68737292	68835537	1	CDH1	cadherin 1 [Source:HGNC Symbol;Acc:HGNC:1748]
ENSG00000040731.10	82.1649	-1.80697	0.698842	0.000259615	0.0111114	TRUE	1008	ENSG00000040731	protein_coding	5	24487100	24644978	-1	CDH10	cadherin 10 [Source:HGNC Symbol;Acc:HGNC:1749]
ENSG00000049759.20	315.19	2.14528	0.362016	1.80315e-10	1.43662e-07	TRUE	23327	ENSG00000049759	protein_coding	18	58044226	58401540	1	NEDD4L	NEDD4 like E3 ubiquitin protein ligase [Source:HGNC Symbol;Acc:HGNC:7728]
ENSG00000054356.14	668.813	-3.29187	0.751779	3.39563e-07	7.40425e-05	TRUE	5798	ENSG00000054356	protein_coding	2	219289623	219309648	-1	PTPRN	protein tyrosine phosphatase receptor type N [Source:HGNC Symbol;Acc:HGNC:9676]
ENSG00000054392.13	124.889	1.45272	0.474718	9.06185e-05	0.00514979	TRUE	55733	ENSG00000054392	protein_coding	1	210328252	210676296	1	HHAT	hedgehog acyltransferase [Source:HGNC Symbol;Acc:HGNC:18270]
ENSG00000055163.20	115.161	2.12048	0.415571	1.59226e-08	6.343e-06	TRUE	26999	ENSG00000055163	protein_coding	5	157266079	157395595	1	CYFIP2	cytoplasmic FMR1 interacting protein 2 [Source:HGNC Symbol;Acc:HGNC:13760]
ENSG00000062038.15	5.55347	4.24255	1.67064	8.96119e-05	0.00514979	TRUE	1001	ENSG00000062038	protein_coding	16	68636189	68727468	1	CDH3	cadherin 3 [Source:HGNC Symbol;Acc:HGNC:1762]
ENSG00000064270.13	14.5492	-1.03944	0.498424	0.00121277	0.0316404	TRUE	9914	ENSG00000064270	protein_coding	16	84368527	84464187	1	ATP2C2	ATPase secretory pathway Ca2+ transporting 2 [Source:HGNC Symbol;Acc:HGNC:29103]
ENSG00000064655.19	158.849	-3.74989	0.753811	1.69431e-08	6.49955e-06	TRUE	2139	ENSG00000064655	protein_coding	20	46894624	47188844	1	EYA2	EYA transcriptional coactivator and phosphatase 2 [Source:HGNC Symbol;Acc:HGNC:3520]
ENSG00000070159.14	60.9989	2.56831	0.628482	1.99024e-06	0.00028433	TRUE	5774	ENSG00000070159	protein_coding	9	109375466	109498313	-1	PTPN3	protein tyrosine phosphatase non-receptor type 3 [Source:HGNC Symbol;Acc:HGNC:9655]
ENSG00000070182.21	73.2782	-2.98339	0.661697	2.65773e-07	6.04999e-05	TRUE	6710	ENSG00000070182	protein_coding	14	64746283	64879907	-1	SPTB	spectrin beta, erythrocytic [Source:HGNC Symbol;Acc:HGNC:11274]
ENSG00000074527.13	4821.25	3.71174	0.756031	4.73415e-08	1.47383e-05	TRUE	59277	ENSG00000074527	protein_coding	12	95657807	95791189	-1	NTN4	netrin 4 [Source:HGNC Symbol;Acc:HGNC:13658]
ENSG00000075651.17	102.621	1.46083	0.443398	4.3527e-05	0.00301265	TRUE	5337	ENSG00000075651	protein_coding	3	171600404	171810950	-1	PLD1	phospholipase D1 [Source:HGNC Symbol;Acc:HGNC:9067]
ENSG00000077092.20	249.386	3.24643	0.651387	3.10633e-08	1.07246e-05	TRUE	5915	ENSG00000077092	protein_coding	3	24687887	25597932	1	RARB	retinoic acid receptor beta [Source:HGNC Symbol;Acc:HGNC:9865]
ENSG00000081051.8	13.5178	-1.7768	0.700732	0.000325505	0.0129569	TRUE	174	ENSG00000081051	protein_coding	4	73431138	73456174	1	AFP	alpha fetoprotein [Source:HGNC Symbol;Acc:HGNC:317]
ENSG00000082497.12	262.975	1.60425	0.636524	0.000424766	0.0153909	TRUE	56256	ENSG00000082497	protein_coding	1	210232796	210246631	1	SERTAD4	SERTA domain containing 4 [Source:HGNC Symbol;Acc:HGNC:25236]
ENSG00000083067.24	6.64412	3.42979	1.26443	0.00020512	0.00933861	TRUE	80036	ENSG00000083067	protein_coding	9	70529060	71446904	-1	TRPM3	transient receptor potential cation channel subfamily M member 3 [Source:HGNC Symbol;Acc:HGNC:17992]
ENSG00000084710.14	156.284	-2.22645	0.492325	2.1604e-07	5.20381e-05	TRUE	22979	ENSG00000084710	protein_coding	2	25042076	25159135	1	EFR3B	EFR3 homolog B [Source:HGNC Symbol;Acc:HGNC:29155]
ENSG00000090339.9	198.725	1.22434	0.698405	0.00228435	0.0478951	TRUE	3383	ENSG00000090339	protein_coding	19	10271093	10286615	1	ICAM1	intercellular adhesion molecule 1 [Source:HGNC Symbol;Acc:HGNC:5344]
ENSG00000092068.21	741.438	-2.3173	0.56723	1.47068e-06	0.000222374	TRUE	23428	ENSG00000092068	protein_coding	14	23125295	23183674	-1	SLC7A8	solute carrier family 7 member 8 [Source:HGNC Symbol;Acc:HGNC:11066]
ENSG00000092969.12	326.312	4.03694	0.752969	4.06858e-09	1.8729e-06	TRUE	7042	ENSG00000092969	protein_coding	1	218345336	218444619	1	TGFB2	transforming growth factor beta 2 [Source:HGNC Symbol;Acc:HGNC:11768]
ENSG00000095203.15	108.679	1.75303	0.539566	4.88631e-05	0.00326516	TRUE	54566	ENSG00000095203	protein_coding	9	109171974	109321059	-1	EPB41L4B	erythrocyte membrane protein band 4.1 like 4B [Source:HGNC Symbol;Acc:HGNC:19818]
ENSG00000095752.7	657.576	-1.98296	0.545949	9.07739e-06	0.000907605	TRUE	3589	ENSG00000095752	protein_coding	19	55364382	55370463	-1	IL11	interleukin 11 [Source:HGNC Symbol;Acc:HGNC:5966]
ENSG00000099204.21	294.922	1.24407	0.476754	0.00036515	0.0138923	TRUE	3983	ENSG00000099204	protein_coding	10	114431112	114768061	-1	ABLIM1	actin binding LIM protein 1 [Source:HGNC Symbol;Acc:HGNC:78]
ENSG00000099256.19	371.669	-1.09599	0.334501	4.363e-05	0.00301265	TRUE	56952	ENSG00000099256	protein_coding	10	24848614	24952606	-1	PRTFDC1	phosphoribosyl transferase domain containing 1 [Source:HGNC Symbol;Acc:HGNC:23333]
ENSG00000099260.12	50.742	2.89141	0.404809	4.50194e-14	1.16572e-10	TRUE	54873	ENSG00000099260	protein_coding	1	99646113	99694541	1	PALMD	palmdelphin [Source:HGNC Symbol;Acc:HGNC:15846]
ENSG00000100065.15	123.292	1.52553	0.739533	0.00119467	0.0313031	TRUE	29775	ENSG00000100065	protein_coding	22	37490362	37519542	-1	CARD10	caspase recruitment domain family member 10 [Source:HGNC Symbol;Acc:HGNC:16422]
ENSG00000100302.7	323.622	-2.8267	0.668095	6.94257e-07	0.000133162	TRUE	23551	ENSG00000100302	protein_coding	22	35540831	35553999	1	RASD2	RASD family member 2 [Source:HGNC Symbol;Acc:HGNC:18229]
ENSG00000100473.18	3.809	3.23302	1.45273	0.000640305	0.0199406	TRUE	1690	ENSG00000100473	protein_coding	14	30874514	30895065	1	COCH	cochlin [Source:HGNC Symbol;Acc:HGNC:2180]
ENSG00000100558.9	214.859	-1.46065	0.544775	0.000221811	0.00992401	TRUE	26499	ENSG00000100558	protein_coding	14	67386984	67412167	-1	PLEK2	pleckstrin 2 [Source:HGNC Symbol;Acc:HGNC:19238]
ENSG00000100628.12	6.608	3.46735	0.972028	1.87821e-05	0.00156254	TRUE	51676	ENSG00000100628	protein_coding	14	93934166	93976739	-1	ASB2	ankyrin repeat and SOCS box containing 2 [Source:HGNC Symbol;Acc:HGNC:16012]
ENSG00000101333.19	1361.01	1.00646	0.301541	4.47803e-05	0.00306146	TRUE	5332	ENSG00000101333	protein_coding	20	9067825	9504593	1	PLCB4	phospholipase C beta 4 [Source:HGNC Symbol;Acc:HGNC:9059]
ENSG00000101336.18	31.0802	5.17623	1.34519	5.65278e-06	0.000626189	TRUE	3055	ENSG00000101336	protein_coding	20	32052197	32101856	1	HCK	HCK proto-oncogene, Src family tyrosine kinase [Source:HGNC Symbol;Acc:HGNC:4840]
ENSG00000101384.12	1432.95	3.11184	0.470619	2.13901e-12	3.69247e-09	TRUE	182	ENSG00000101384	protein_coding	20	10637684	10673999	-1	JAG1	jagged canonical Notch ligand 1 [Source:HGNC Symbol;Acc:HGNC:6188]
ENSG00000101825.8	7495.79	-2.01126	0.653439	5.74473e-05	0.00368427	TRUE	25878	ENSG00000101825	protein_coding	X	3308565	3346652	-1	MXRA5	matrix remodeling associated 5 [Source:HGNC Symbol;Acc:HGNC:7539]
ENSG00000102471.15	911.245	1.06399	0.337998	8.4896e-05	0.00495386	TRUE	54602	ENSG00000102471	protein_coding	13	79481124	79556077	1	NDFIP2	Nedd4 family interacting protein 2 [Source:HGNC Symbol;Acc:HGNC:18537]
ENSG00000102935.12	64.2136	2.63922	0.59969	5.01443e-07	9.98787e-05	TRUE	23090	ENSG00000102935	protein_coding	16	49487524	49857919	-1	ZNF423	zinc finger protein 423 [Source:HGNC Symbol;Acc:HGNC:16762]
ENSG00000103942.13	414.001	-1.2961	0.72666	0.00160653	0.0378641	TRUE	9455	ENSG00000103942	protein_coding	15	82836946	82986153	-1	HOMER2	homer scaffold protein 2 [Source:HGNC Symbol;Acc:HGNC:17513]
ENSG00000104219.13	544.649	1.05722	0.290991	1.49123e-05	0.0013145	TRUE	51201	ENSG00000104219	protein_coding	8	17156482	17224799	1	ZDHHC2	zinc finger DHHC-type palmitoyltransferase 2 [Source:HGNC Symbol;Acc:HGNC:18469]
ENSG00000104332.12	5974.05	-4.90106	0.769654	5.52311e-12	7.62741e-09	TRUE	6422	ENSG00000104332	protein_coding	8	41261962	41309473	-1	SFRP1	secreted frizzled related protein 1 [Source:HGNC Symbol;Acc:HGNC:10776]
ENSG00000104783.15	176.656	-1.58385	0.431535	9.11329e-06	0.000907605	TRUE	3783	ENSG00000104783	protein_coding	19	43766533	43780976	-1	KCNN4	potassium calcium-activated channel subfamily N member 4 [Source:HGNC Symbol;Acc:HGNC:6293]
ENSG00000105464.4	111.891	-1.12212	0.64926	0.00197331	0.0439068	TRUE	2906	ENSG00000105464	protein_coding	19	48393668	48444931	1	GRIN2D	glutamate ionotropic receptor NMDA type subunit 2D [Source:HGNC Symbol;Acc:HGNC:4588]
ENSG00000105655.19	176.581	1.16562	0.475354	0.000555369	0.0181459	TRUE	51477	ENSG00000105655	protein_coding	19	18434388	18438167	-1	ISYNA1	inositol-3-phosphate synthase 1 [Source:HGNC Symbol;Acc:HGNC:29821]
ENSG00000105963.15	54.2157	-1.48294	0.549163	0.000201621	0.00921981	TRUE	11033	ENSG00000105963	protein_coding	7	897900	955407	-1	ADAP1	ArfGAP with dual PH domains 1 [Source:HGNC Symbol;Acc:HGNC:16486]
ENSG00000106484.16	642.588	4.09169	0.755193	3.18527e-09	1.53449e-06	TRUE	4232	ENSG00000106484	protein_coding	7	130486171	130506465	1	MEST	mesoderm specific transcript [Source:HGNC Symbol;Acc:HGNC:7028]
ENSG00000106511.6	217.03	6.87782	1.18967	4.28812e-10	2.96095e-07	TRUE	4223	ENSG00000106511	protein_coding	7	15611212	15686683	-1	MEOX2	mesenchyme homeobox 2 [Source:HGNC Symbol;Acc:HGNC:7014]
ENSG00000106714.18	9.68214	7.43631	3.08259	6.14014e-05	0.00388969	TRUE	79937	ENSG00000106714	protein_coding	9	39064710	39288315	-1	CNTNAP3	contactin associated protein family member 3 [Source:HGNC Symbol;Acc:HGNC:13834]
ENSG00000106976.21	725.35	-1.64136	0.428102	4.55788e-06	0.000545364	TRUE	1759	ENSG00000106976	protein_coding	9	128191655	128255248	1	DNM1	dynamin 1 [Source:HGNC Symbol;Acc:HGNC:2972]
ENSG00000107249.24	401.282	-1.03979	0.259523	2.91955e-06	0.000384335	TRUE	169792	ENSG00000107249	protein_coding	9	3824127	4348392	-1	GLIS3	GLIS family zinc finger 3 [Source:HGNC Symbol;Acc:HGNC:28510]
ENSG00000108551.5	38.3376	-1.37767	0.732739	0.0013878	0.0346782	TRUE	51655	ENSG00000108551	protein_coding	17	17494437	17496395	-1	RASD1	ras related dexamethasone induced 1 [Source:HGNC Symbol;Acc:HGNC:15828]
ENSG00000108639.8	283.678	1.11336	0.534244	0.00130558	0.0333069	TRUE	9144	ENSG00000108639	protein_coding	17	78168581	78173527	1	SYNGR2	synaptogyrin 2 [Source:HGNC Symbol;Acc:HGNC:11499]
ENSG00000108691.9	248.394	1.79111	0.549703	4.73271e-05	0.00318305	TRUE	6347	ENSG00000108691	protein_coding	17	34255218	34257203	1	CCL2	C-C motif chemokine ligand 2 [Source:HGNC Symbol;Acc:HGNC:10618]
ENSG00000109063.15	478.532	4.22913	1.2397	2.38034e-05	0.00184677	TRUE	4621	ENSG00000109063	protein_coding	17	10628526	10657309	-1	MYH3	myosin heavy chain 3 [Source:HGNC Symbol;Acc:HGNC:7573]
ENSG00000109743.11	989.443	1.6047	0.541733	0.000124603	0.00648413	TRUE	683	ENSG00000109743	protein_coding	4	15703065	15738313	1	BST1	bone marrow stromal cell antigen 1 [Source:HGNC Symbol;Acc:HGNC:1118]
ENSG00000109861.17	1318.79	1.86866	0.687926	0.000243349	0.010546	TRUE	1075	ENSG00000109861	protein_coding	11	88265069	88359684	-1	CTSC	cathepsin C [Source:HGNC Symbol;Acc:HGNC:2528]
ENSG00000110080.20	767.911	-1.03386	0.247537	1.444e-06	0.000221574	TRUE	6484	ENSG00000110080	protein_coding	11	126355640	126440344	1	ST3GAL4	ST3 beta-galactoside alpha-2,3-sialyltransferase 4 [Source:HGNC Symbol;Acc:HGNC:10864]
ENSG00000110203.10	25.6393	-1.81402	0.689883	0.000234272	0.010225	TRUE	2352	ENSG00000110203	protein_coding	11	72114869	72139892	1	FOLR3	folate receptor gamma [Source:HGNC Symbol;Acc:HGNC:3795]
ENSG00000110660.15	143.949	-1.01185	0.388873	0.00035208	0.0135856	TRUE	54733	ENSG00000110660	protein_coding	11	107790991	107928293	-1	SLC35F2	solute carrier family 35 member F2 [Source:HGNC Symbol;Acc:HGNC:23615]
ENSG00000110900.16	125.248	-1.85621	0.73935	0.000302069	0.0124154	TRUE	441631	ENSG00000110900	protein_coding	12	30926428	30996602	1	TSPAN11	tetraspanin 11 [Source:HGNC Symbol;Acc:HGNC:30795]
ENSG00000111057.11	3079.29	2.92837	0.788563	8.87417e-06	0.000892371	TRUE	3875	ENSG00000111057	protein_coding	12	52948871	52952906	1	KRT18	keratin 18 [Source:HGNC Symbol;Acc:HGNC:6430]
ENSG00000111110.12	97.0689	2.75533	0.738955	8.16618e-06	0.000836588	TRUE	57460	ENSG00000111110	protein_coding	12	62643994	62935150	-1	PPM1H	protein phosphatase, Mg2+/Mn2+ dependent 1H [Source:HGNC Symbol;Acc:HGNC:18583]
ENSG00000111859.17	1012.5	1.60837	0.354499	3.02257e-07	6.73588e-05	TRUE	4739	ENSG00000111859	protein_coding	6	11183298	11382348	-1	NEDD9	neural precursor cell expressed, developmentally down-regulated 9 [Source:HGNC Symbol;Acc:HGNC:7733]
ENSG00000112137.19	14.0467	-1.87785	0.502416	7.49299e-06	0.000787905	TRUE	221692	ENSG00000112137	protein_coding	6	12716312	13290446	1	PHACTR1	phosphatase and actin regulator 1 [Source:HGNC Symbol;Acc:HGNC:20990]
ENSG00000112414.15	365.894	1.38292	0.695421	0.00147683	0.0360336	TRUE	57211	ENSG00000112414	protein_coding	6	142301854	142446266	1	ADGRG6	adhesion G protein-coupled receptor G6 [Source:HGNC Symbol;Acc:HGNC:13841]
ENSG00000113389.16	4897.56	-1.91412	0.646047	8.41745e-05	0.00492563	TRUE	4883	ENSG00000113389	protein_coding	5	32689070	32791724	1	NPR3	natriuretic peptide receptor 3 [Source:HGNC Symbol;Acc:HGNC:7945]
ENSG00000113494.17	36.7359	-1.50105	0.481627	6.35174e-05	0.00398716	TRUE	5618	ENSG00000113494	protein_coding	5	35048756	35230487	-1	PRLR	prolactin receptor [Source:HGNC Symbol;Acc:HGNC:9446]
ENSG00000114251.15	3666.91	1.38414	0.547823	0.000450183	0.0158868	TRUE	7474	ENSG00000114251	protein_coding	3	55465715	55490539	-1	WNT5A	Wnt family member 5A [Source:HGNC Symbol;Acc:HGNC:12784]
ENSG00000114854.8	34.7988	3.73624	0.926747	2.42511e-06	0.000332689	TRUE	7134	ENSG00000114854	protein_coding	3	52451100	52454041	-1	TNNC1	troponin C1, slow skeletal and cardiac type [Source:HGNC Symbol;Acc:HGNC:11943]
ENSG00000115165.10	27.6994	7.6644	1.48965	3.83781e-12	6.1154e-09	TRUE	9595	ENSG00000115165	protein_coding	2	157414619	157488961	-1	CYTIP	cytohesin 1 interacting protein [Source:HGNC Symbol;Acc:HGNC:9506]
ENSG00000115271.11	7.71059	1.6954	1.0358	0.00208636	0.045342	TRUE	25801	ENSG00000115271	protein_coding	2	162318840	162371595	1	GCA	grancalcin [Source:HGNC Symbol;Acc:HGNC:15990]
ENSG00000115339.14	49.1158	3.63819	0.497283	1.1778e-14	4.87962e-11	TRUE	2591	ENSG00000115339	protein_coding	2	165747588	165794659	-1	GALNT3	polypeptide N-acetylgalactosaminyltransferase 3 [Source:HGNC Symbol;Acc:HGNC:4125]
ENSG00000115380.20	5185.84	1.71452	0.903875	0.00159218	0.0377368	TRUE	2202	ENSG00000115380	protein_coding	2	55865967	55924139	-1	EFEMP1	EGF containing fibulin extracellular matrix protein 1 [Source:HGNC Symbol;Acc:HGNC:3218]
ENSG00000115415.20	6734.71	1.49359	0.38466	5.23343e-06	0.000592407	TRUE	6772	ENSG00000115415	protein_coding	2	190908460	191020960	-1	STAT1	signal transducer and activator of transcription 1 [Source:HGNC Symbol;Acc:HGNC:11362]
ENSG00000115457.10	274.485	4.07682	0.701674	3.30361e-10	2.44408e-07	TRUE	3485	ENSG00000115457	protein_coding	2	216632828	216664436	1	IGFBP2	insulin like growth factor binding protein 2 [Source:HGNC Symbol;Acc:HGNC:5471]
ENSG00000116106.12	295.306	1.5132	0.494664	9.32738e-05	0.00525847	TRUE	2043	ENSG00000116106	protein_coding	2	221418027	221574202	-1	EPHA4	EPH receptor A4 [Source:HGNC Symbol;Acc:HGNC:3388]
ENSG00000116117.19	480.128	1.71106	0.401697	9.85859e-07	0.000170184	TRUE	117583	ENSG00000116117	protein_coding	2	204545475	205620162	1	PARD3B	par-3 family cell polarity regulator beta [Source:HGNC Symbol;Acc:HGNC:14446]
ENSG00000116678.20	320.898	1.08084	0.379619	0.000201264	0.00921981	TRUE	3953	ENSG00000116678	protein_coding	1	65420652	65641559	1	LEPR	leptin receptor [Source:HGNC Symbol;Acc:HGNC:6554]
ENSG00000116991.12	259.912	1.79077	0.721642	0.000447626	0.0158868	TRUE	57568	ENSG00000116991	protein_coding	1	232397965	232630571	-1	SIPA1L2	signal induced proliferation associated 1 like 2 [Source:HGNC Symbol;Acc:HGNC:23800]
ENSG00000117114.21	1125.68	1.47407	0.653648	0.000832696	0.0241587	TRUE	23266	ENSG00000117114	protein_coding	1	81306147	81993932	1	ADGRL2	adhesion G protein-coupled receptor L2 [Source:HGNC Symbol;Acc:HGNC:18582]
ENSG00000117155.17	1394.46	-2.39817	0.534406	2.39931e-07	5.58446e-05	TRUE	117178	ENSG00000117155	protein_coding	1	84643706	84690803	-1	SSX2IP	SSX family member 2 interacting protein [Source:HGNC Symbol;Acc:HGNC:16509]
ENSG00000117595.12	319.709	-1.91709	0.762602	0.000289843	0.0120807	TRUE	3664	ENSG00000117595	protein_coding	1	209785617	209806175	-1	IRF6	interferon regulatory factor 6 [Source:HGNC Symbol;Acc:HGNC:6121]
ENSG00000118473.23	450.019	1.28995	0.516665	0.000496985	0.016934	TRUE	84251	ENSG00000118473	protein_coding	1	66533267	66751139	1	SGIP1	SH3GL interacting endocytic adaptor 1 [Source:HGNC Symbol;Acc:HGNC:25412]
ENSG00000118898.16	75.0091	3.03361	1.51461	0.00109511	0.0293873	TRUE	5493	ENSG00000118898	protein_coding	16	4882507	4960741	-1	PPL	periplakin [Source:HGNC Symbol;Acc:HGNC:9273]
ENSG00000119862.13	39.5034	1.9938	0.607282	4.55246e-05	0.00310211	TRUE	29094	ENSG00000119862	protein_coding	2	64453969	64461381	1	LGALSL	galectin like [Source:HGNC Symbol;Acc:HGNC:25012]
ENSG00000120279.7	35.486	3.83013	1.36557	0.000144848	0.00723019	TRUE	80177	ENSG00000120279	protein_coding	6	152697897	152724569	1	MYCT1	MYC target 1 [Source:HGNC Symbol;Acc:HGNC:23172]
ENSG00000120594.17	84.4644	-3.05571	0.558607	1.81882e-09	9.91499e-07	TRUE	84898	ENSG00000120594	protein_coding	10	19816239	20289856	1	PLXDC2	plexin domain containing 2 [Source:HGNC Symbol;Acc:HGNC:21013]
ENSG00000120738.8	992.268	1.84094	0.583747	6.72981e-05	0.00413674	TRUE	1958	ENSG00000120738	protein_coding	5	138465479	138469303	1	EGR1	early growth response 1 [Source:HGNC Symbol;Acc:HGNC:3238]
ENSG00000120875.9	625.146	-1.42861	0.674879	0.000831034	0.0241443	TRUE	1846	ENSG00000120875	protein_coding	8	29333064	29350684	-1	DUSP4	dual specificity phosphatase 4 [Source:HGNC Symbol;Acc:HGNC:3070]
ENSG00000121068.14	174.446	1.17621	0.33067	1.82309e-05	0.00153518	TRUE	6909	ENSG00000121068	protein_coding	17	61399843	61409466	1	TBX2	T-box transcription factor 2 [Source:HGNC Symbol;Acc:HGNC:11597]
ENSG00000121361.5	229.272	-1.96322	0.758185	0.000236485	0.0102916	TRUE	3764	ENSG00000121361	protein_coding	12	21764955	21775600	-1	KCNJ8	potassium inwardly rectifying channel subfamily J member 8 [Source:HGNC Symbol;Acc:HGNC:6269]
ENSG00000122335.17	419.351	1.26469	0.352462	1.56667e-05	0.00135789	TRUE	84947	ENSG00000122335	protein_coding	6	158109519	158168280	-1	SERAC1	serine active site containing 1 [Source:HGNC Symbol;Acc:HGNC:21061]
ENSG00000122861.16	1065.29	2.00888	0.401257	2.89582e-08	1.01673e-05	TRUE	5328	ENSG00000122861	protein_coding	10	73909177	73917496	1	PLAU	plasminogen activator, urokinase [Source:HGNC Symbol;Acc:HGNC:9052]
ENSG00000123095.6	170.714	-1.51903	0.411022	8.01685e-06	0.000826214	TRUE	79365	ENSG00000123095	protein_coding	12	26120030	26125037	-1	BHLHE41	basic helix-loop-helix family member e41 [Source:HGNC Symbol;Acc:HGNC:16617]
ENSG00000123612.16	24.1397	3.95225	0.485293	7.64558e-17	5.27927e-13	TRUE	130399	ENSG00000123612	protein_coding	2	157526767	157628864	-1	ACVR1C	activin A receptor type 1C [Source:HGNC Symbol;Acc:HGNC:18123]
ENSG00000123685.9	17.7262	2.26037	0.773912	0.000135995	0.00687108	TRUE	55509	ENSG00000123685	protein_coding	1	212686417	212699840	-1	BATF3	basic leucine zipper ATF-like transcription factor 3 [Source:HGNC Symbol;Acc:HGNC:28915]
ENSG00000123901.9	6.39117	-2.68171	1.02641	0.00030929	0.012642	TRUE	10888	ENSG00000123901	protein_coding	11	94377316	94401419	-1	GPR83	G protein-coupled receptor 83 [Source:HGNC Symbol;Acc:HGNC:4523]
ENSG00000124216.4	498.009	-1.79315	0.459202	3.31963e-06	0.000421846	TRUE	6615	ENSG00000124216	protein_coding	20	49982980	49988886	1	SNAI1	snail family transcriptional repressor 1 [Source:HGNC Symbol;Acc:HGNC:11128]
ENSG00000124772.12	14.43	-2.81992	0.831883	2.13907e-05	0.00172266	TRUE	57699	ENSG00000124772	protein_coding	6	36740775	36839444	-1	CPNE5	copine 5 [Source:HGNC Symbol;Acc:HGNC:2318]
ENSG00000125355.16	18.0974	3.05968	0.746758	1.82173e-06	0.00027149	TRUE	55026	ENSG00000125355	protein_coding	X	120258650	120311556	-1	TMEM255A	transmembrane protein 255A [Source:HGNC Symbol;Acc:HGNC:26086]
ENSG00000125378.16	46.0988	3.83857	0.727408	8.14718e-09	3.59083e-06	TRUE	652	ENSG00000125378	protein_coding	14	53949736	53958761	-1	BMP4	bone morphogenetic protein 4 [Source:HGNC Symbol;Acc:HGNC:1071]
ENSG00000125726.11	6.63315	3.57817	1.00818	2.43315e-05	0.0018737	TRUE	970	ENSG00000125726	protein_coding	19	6583183	6604103	-1	CD70	CD70 molecule [Source:HGNC Symbol;Acc:HGNC:11937]
ENSG00000125810.10	7.19168	4.05461	1.72804	0.000362146	0.0138923	TRUE	22918	ENSG00000125810	protein_coding	20	23079360	23086324	-1	CD93	CD93 molecule [Source:HGNC Symbol;Acc:HGNC:15855]
ENSG00000125965.9	79.5312	2.83672	0.732853	4.60723e-06	0.000545364	TRUE	8200	ENSG00000125965	protein_coding	20	35433347	35454746	-1	GDF5	growth differentiation factor 5 [Source:HGNC Symbol;Acc:HGNC:4220]
ENSG00000126010.6	112.08	3.58396	0.811595	4.86778e-07	9.78991e-05	TRUE	2925	ENSG00000126010	protein_coding	X	16123565	16153518	1	GRPR	gastrin releasing peptide receptor [Source:HGNC Symbol;Acc:HGNC:4609]
ENSG00000126778.12	134.013	1.40162	0.359845	4.6577e-06	0.000548206	TRUE	6495	ENSG00000126778	protein_coding	14	60643421	60658259	-1	SIX1	SIX homeobox 1 [Source:HGNC Symbol;Acc:HGNC:10887]
ENSG00000126950.8	41.4642	2.78073	0.562644	3.39079e-08	1.13291e-05	TRUE	59353	ENSG00000126950	protein_coding	X	101078879	101096367	1	TMEM35A	transmembrane protein 35A [Source:HGNC Symbol;Acc:HGNC:25864]
ENSG00000127863.16	1241.8	-1.20032	0.618412	0.00130075	0.0333065	TRUE	55504	ENSG00000127863	protein_coding	13	23570370	23676104	1	TNFRSF19	TNF receptor superfamily member 19 [Source:HGNC Symbol;Acc:HGNC:11915]
ENSG00000127946.17	1901.69	-1.07678	0.286911	8.19828e-06	0.000836588	TRUE	3092	ENSG00000127946	protein_coding	7	75533298	75738962	-1	HIP1	huntingtin interacting protein 1 [Source:HGNC Symbol;Acc:HGNC:4913]
ENSG00000128045.7	67.3574	-2.82266	0.681808	1.08489e-06	0.000181237	TRUE	65997	ENSG00000128045	protein_coding	4	52862317	52866835	1	RASL11B	RAS like family 11 member B [Source:HGNC Symbol;Acc:HGNC:23804]
ENSG00000128052.10	18.7128	-4.59636	0.961089	6.22763e-08	1.84293e-05	TRUE	3791	ENSG00000128052	protein_coding	4	55078481	55125595	-1	KDR	kinase insert domain receptor [Source:HGNC Symbol;Acc:HGNC:6307]
ENSG00000128342.5	165.695	2.15161	1.14682	0.00144233	0.03553	TRUE	3976	ENSG00000128342	protein_coding	22	30240453	30246759	-1	LIF	LIF interleukin 6 family cytokine [Source:HGNC Symbol;Acc:HGNC:6596]
ENSG00000128422.18	43.5879	1.75908	1.10872	0.00233368	0.0484877	TRUE	3872	ENSG00000128422	protein_coding	17	41619442	41624842	-1	KRT17	keratin 17 [Source:HGNC Symbol;Acc:HGNC:6427]
ENSG00000128510.12	418.281	2.55264	0.592571	7.9426e-07	0.000145603	TRUE	51200	ENSG00000128510	protein_coding	7	130293134	130324180	1	CPA4	carboxypeptidase A4 [Source:HGNC Symbol;Acc:HGNC:15740]
ENSG00000128594.8	45.8834	-1.75913	0.591067	8.60934e-05	0.00500962	TRUE	64101	ENSG00000128594	protein_coding	7	128027071	128032107	-1	LRRC4	leucine rich repeat containing 4 [Source:HGNC Symbol;Acc:HGNC:15586]
ENSG00000128606.13	148.958	3.13614	0.766697	1.97735e-06	0.00028433	TRUE	10234	ENSG00000128606	protein_coding	7	102913000	102945111	1	LRRC17	leucine rich repeat containing 17 [Source:HGNC Symbol;Acc:HGNC:16895]
ENSG00000128641.19	7017.6	1.0121	0.280813	1.56511e-05	0.00135789	TRUE	4430	ENSG00000128641	protein_coding	2	191245185	191425389	1	MYO1B	myosin IB [Source:HGNC Symbol;Acc:HGNC:7596]
ENSG00000129009.13	10595.9	-1.35876	0.502145	0.000197991	0.0091142	TRUE	3671	ENSG00000129009	protein_coding	15	74173710	74176872	1	ISLR	immunoglobulin superfamily containing leucine rich repeat [Source:HGNC Symbol;Acc:HGNC:6133]
ENSG00000129048.7	121.567	-3.40092	0.537577	9.89202e-12	1.20537e-08	TRUE	51554	ENSG00000129048	protein_coding	3	132597270	132618967	1	ACKR4	atypical chemokine receptor 4 [Source:HGNC Symbol;Acc:HGNC:1611]
ENSG00000129422.15	5.63361	3.38323	1.25345	0.000196869	0.00908272	TRUE	57509	ENSG00000129422	protein_coding	8	17643795	17801094	-1	MTUS1	microtubule associated scaffold protein 1 [Source:HGNC Symbol;Acc:HGNC:29789]
ENSG00000129596.5	17.1993	1.1111	0.368793	0.000134277	0.00681751	TRUE	1036	ENSG00000129596	protein_coding	5	115804733	115816659	-1	CDO1	cysteine dioxygenase type 1 [Source:HGNC Symbol;Acc:HGNC:1795]
ENSG00000130513.7	62.2813	1.7126	0.783007	0.000855654	0.0246521	TRUE	9518	ENSG00000130513	protein_coding	19	18374731	18389176	1	GDF15	growth differentiation factor 15 [Source:HGNC Symbol;Acc:HGNC:30142]
ENSG00000130558.20	119.699	-2.09461	0.409079	1.13256e-08	4.88771e-06	TRUE	10439	ENSG00000130558	protein_coding	9	135075422	135121180	1	OLFM1	olfactomedin 1 [Source:HGNC Symbol;Acc:HGNC:17187]
ENSG00000130592.17	16.0847	3.25849	1.06289	7.79912e-05	0.00466933	TRUE	4046	ENSG00000130592	protein_coding	11	1850904	1892267	1	LSP1	lymphocyte specific protein 1 [Source:HGNC Symbol;Acc:HGNC:6707]
ENSG00000131016.17	2457.69	1.75085	0.339393	1.3681e-08	5.55691e-06	TRUE	9590	ENSG00000131016	protein_coding	6	151239967	151358559	1	AKAP12	A-kinase anchoring protein 12 [Source:HGNC Symbol;Acc:HGNC:370]
ENSG00000132359.15	113.885	2.11223	0.717618	0.000120137	0.00628443	TRUE	23108	ENSG00000132359	protein_coding	17	2755705	3037741	1	RAP1GAP2	RAP1 GTPase activating protein 2 [Source:HGNC Symbol;Acc:HGNC:29176]
ENSG00000132470.14	11.2667	1.67336	0.756775	0.000789482	0.0231645	TRUE	3691	ENSG00000132470	protein_coding	17	75721328	75757818	1	ITGB4	integrin subunit beta 4 [Source:HGNC Symbol;Acc:HGNC:6158]
ENSG00000133135.14	38.5078	-2.29708	0.777415	8.08834e-05	0.00481465	TRUE	79589	ENSG00000133135	protein_coding	X	106693794	106797016	1	RNF128	ring finger protein 128 [Source:HGNC Symbol;Acc:HGNC:21153]
ENSG00000133256.13	5.67055	5.71772	1.51426	4.68606e-07	9.51684e-05	TRUE	5158	ENSG00000133256	protein_coding	4	625573	670782	1	PDE6B	phosphodiesterase 6B [Source:HGNC Symbol;Acc:HGNC:8786]
ENSG00000133392.18	44.2546	1.76227	0.555233	6.18537e-05	0.00389453	TRUE	4629	ENSG00000133392	protein_coding	16	15703135	15857028	-1	MYH11	myosin heavy chain 11 [Source:HGNC Symbol;Acc:HGNC:7569]
ENSG00000133657.17	3964.4	1.16035	0.361352	6.722e-05	0.00413674	TRUE	79572	ENSG00000133657	protein_coding	3	194402672	194498364	-1	ATP13A3	ATPase 13A3 [Source:HGNC Symbol;Acc:HGNC:24113]
ENSG00000134363.12	1296	1.3003	0.487102	0.000309413	0.012642	TRUE	10468	ENSG00000134363	protein_coding	5	53480626	53487134	1	FST	follistatin [Source:HGNC Symbol;Acc:HGNC:3971]
ENSG00000134463.15	28.7562	2.10945	0.701715	0.000110535	0.00596373	TRUE	79746	ENSG00000134463	protein_coding	10	11742366	11764070	1	ECHDC3	enoyl-CoA hydratase domain containing 3 [Source:HGNC Symbol;Acc:HGNC:23489]
ENSG00000134508.13	417.28	-1.09029	0.316566	2.45477e-05	0.0018764	TRUE	91768	ENSG00000134508	protein_coding	18	23134564	23260470	1	CABLES1	Cdk5 and Abl enzyme substrate 1 [Source:HGNC Symbol;Acc:HGNC:25097]
ENSG00000134775.16	1223.6	-1.30664	0.302322	6.4482e-07	0.000124836	TRUE	80206	ENSG00000134775	protein_coding	18	36297713	36780220	1	FHOD3	formin homology 2 domain containing 3 [Source:HGNC Symbol;Acc:HGNC:26178]
ENSG00000135083.17	18.6168	2.93827	1.14775	0.000330188	0.0130531	TRUE	79616	ENSG00000135083	protein_coding	5	160249083	160345396	-1	CCNJL	cyclin J like [Source:HGNC Symbol;Acc:HGNC:25876]
ENSG00000135312.7	2.65186	5.34096	2.71723	0.000424475	0.0153909	TRUE	3351	ENSG00000135312	protein_coding	6	77460924	77463491	-1	HTR1B	5-hydroxytryptamine receptor 1B [Source:HGNC Symbol;Acc:HGNC:5287]
ENSG00000135424.19	983.394	3.23763	0.54365	1.42092e-10	1.17737e-07	TRUE	3679	ENSG00000135424	protein_coding	12	55684568	55716404	-1	ITGA7	integrin subunit alpha 7 [Source:HGNC Symbol;Acc:HGNC:6143]
ENSG00000135437.10	132.512	1.16014	0.569026	0.00140336	0.0349407	TRUE	5959	ENSG00000135437	protein_coding	12	55720367	55724705	1	RDH5	retinol dehydrogenase 5 [Source:HGNC Symbol;Acc:HGNC:9940]
ENSG00000135454.14	572.03	-1.43558	0.393547	9.94735e-06	0.00098593	TRUE	2583	ENSG00000135454	protein_coding	12	57623409	57633239	-1	B4GALNT1	beta-1,4-N-acetyl-galactosaminyltransferase 1 [Source:HGNC Symbol;Acc:HGNC:4117]
ENSG00000135472.9	12.4767	1.71803	1.01772	0.00197982	0.0439668	TRUE	23017	ENSG00000135472	protein_coding	12	49866896	49904217	-1	FAIM2	Fas apoptotic inhibitory molecule 2 [Source:HGNC Symbol;Acc:HGNC:17067]
ENSG00000135604.10	14.2256	1.85986	0.584723	6.68091e-05	0.0041312	TRUE	8676	ENSG00000135604	protein_coding	6	144150517	144191939	1	STX11	syntaxin 11 [Source:HGNC Symbol;Acc:HGNC:11429]
ENSG00000136014.12	4.87356	2.92312	1.34003	0.00127588	0.0327913	TRUE	84101	ENSG00000136014	protein_coding	12	95516560	95551476	-1	USP44	ubiquitin specific peptidase 44 [Source:HGNC Symbol;Acc:HGNC:20064]
ENSG00000136367.15	47.4942	2.5335	0.769678	2.96273e-05	0.00218409	TRUE	85446	ENSG00000136367	protein_coding	14	23520857	23556192	-1	ZFHX2	zinc finger homeobox 2 [Source:HGNC Symbol;Acc:HGNC:20152]
ENSG00000136378.15	840.927	1.3096	0.594783	0.00096576	0.0268173	TRUE	11173	ENSG00000136378	protein_coding	15	78759206	78811464	-1	ADAMTS7	ADAM metallopeptidase with thrombospondin type 1 motif 7 [Source:HGNC Symbol;Acc:HGNC:223]
ENSG00000136842.14	13.6376	2.5403	0.896621	0.000161491	0.00787128	TRUE	7111	ENSG00000136842	protein_coding	9	97501180	97601743	1	TMOD1	tropomodulin 1 [Source:HGNC Symbol;Acc:HGNC:11871]
ENSG00000137193.14	263.728	1.0265	0.51428	0.00162645	0.0381034	TRUE	5292	ENSG00000137193	protein_coding	6	37170152	37175428	1	PIM1	Pim-1 proto-oncogene, serine/threonine kinase [Source:HGNC Symbol;Acc:HGNC:8986]
ENSG00000137273.6	138.176	-1.65965	0.13877	3.62469e-34	7.50855e-30	TRUE	2295	ENSG00000137273	protein_coding	6	1389576	1395603	1	FOXF2	forkhead box F2 [Source:HGNC Symbol;Acc:HGNC:3810]
ENSG00000137501.18	686.762	1.43234	0.47414	0.000106659	0.0057839	TRUE	54843	ENSG00000137501	protein_coding	11	85694224	85811159	-1	SYTL2	synaptotagmin like 2 [Source:HGNC Symbol;Acc:HGNC:15585]
ENSG00000137507.11	492.674	1.67891	0.456841	1.10479e-05	0.00107445	TRUE	2615	ENSG00000137507	protein_coding	11	76657524	76670747	-1	LRRC32	leucine rich repeat containing 32 [Source:HGNC Symbol;Acc:HGNC:4161]
ENSG00000137672.13	164.982	2.93703	1.41589	0.000916461	0.0258997	TRUE	7225	ENSG00000137672	protein_coding	11	101451564	101872562	-1	TRPC6	transient receptor potential cation channel subfamily C member 6 [Source:HGNC Symbol;Acc:HGNC:12338]
ENSG00000137699.17	38.6022	-1.73582	0.551104	5.15584e-05	0.00342751	TRUE	23650	ENSG00000137699	protein_coding	11	120111286	120185529	-1	TRIM29	tripartite motif containing 29 [Source:HGNC Symbol;Acc:HGNC:17274]
ENSG00000137727.13	85.8901	2.07158	0.859781	0.000503059	0.0170554	TRUE	57569	ENSG00000137727	protein_coding	11	110577042	110713189	-1	ARHGAP20	Rho GTPase activating protein 20 [Source:HGNC Symbol;Acc:HGNC:18357]
ENSG00000138111.14	17.6926	1.2587	0.398533	6.43305e-05	0.00402233	TRUE	79847	ENSG00000138111	protein_coding	10	102461395	102477045	1	MFSD13A	major facilitator superfamily domain containing 13A [Source:HGNC Symbol;Acc:HGNC:26196]
ENSG00000138190.17	63.8504	1.62498	0.401648	2.69086e-06	0.00035962	TRUE	54536	ENSG00000138190	protein_coding	10	92826831	93059493	1	EXOC6	exocyst complex component 6 [Source:HGNC Symbol;Acc:HGNC:23196]
ENSG00000138378.19	58.2296	1.66319	0.605145	0.000223466	0.00995505	TRUE	6775	ENSG00000138378	protein_coding	2	191029576	191151596	-1	STAT4	signal transducer and activator of transcription 4 [Source:HGNC Symbol;Acc:HGNC:11365]
ENSG00000138650.9	596.042	2.38335	1.35692	0.00169653	0.0391828	TRUE	57575	ENSG00000138650	protein_coding	4	133149294	133208606	1	PCDH10	protocadherin 10 [Source:HGNC Symbol;Acc:HGNC:13404]
ENSG00000138696.11	43.1707	-1.81677	0.546056	2.92103e-05	0.00216879	TRUE	658	ENSG00000138696	protein_coding	4	94757955	95158448	1	BMPR1B	bone morphogenetic protein receptor type 1B [Source:HGNC Symbol;Acc:HGNC:1077]
ENSG00000139292.13	128.669	3.38173	0.89153	6.84112e-06	0.000738093	TRUE	8549	ENSG00000139292	protein_coding	12	71439798	71586310	1	LGR5	leucine rich repeat containing G protein-coupled receptor 5 [Source:HGNC Symbol;Acc:HGNC:4504]
ENSG00000139304.16	119.927	2.25794	0.523407	8.53323e-07	0.000152384	TRUE	374462	ENSG00000139304	protein_coding	12	80402178	80680273	1	PTPRQ	protein tyrosine phosphatase receptor type Q [Source:HGNC Symbol;Acc:HGNC:9679]
ENSG00000139364.11	107.569	-1.74566	0.602493	0.000111134	0.0059796	TRUE	114795	ENSG00000139364	protein_coding	12	125186386	125662377	1	TMEM132B	transmembrane protein 132B [Source:HGNC Symbol;Acc:HGNC:29397]
ENSG00000139508.15	105.659	1.03745	0.419105	0.000573825	0.0186022	TRUE	283537	ENSG00000139508	protein_coding	13	28700064	28718970	-1	SLC46A3	solute carrier family 46 member 3 [Source:HGNC Symbol;Acc:HGNC:27501]
ENSG00000139970.18	47.7224	4.47893	1.1099	2.04918e-06	0.000290744	TRUE	6252	ENSG00000139970	protein_coding	14	59595976	59870776	-1	RTN1	reticulon 1 [Source:HGNC Symbol;Acc:HGNC:10467]
ENSG00000139998.16	552.807	-1.03253	0.246994	1.4287e-06	0.000220862	TRUE	376267	ENSG00000139998	protein_coding	14	64945814	64973226	-1	RAB15	RAB15, member RAS oncogene family [Source:HGNC Symbol;Acc:HGNC:20150]
ENSG00000141574.8	184.541	2.99689	0.684673	5.78682e-07	0.000114166	TRUE	6398	ENSG00000141574	protein_coding	17	82321024	82334074	-1	SECTM1	secreted and transmembrane 1 [Source:HGNC Symbol;Acc:HGNC:10707]
ENSG00000142621.21	25.7869	1.54873	0.690249	0.00068847	0.020973	TRUE	114827	ENSG00000142621	protein_coding	1	15236521	15400283	1	FHAD1	forkhead associated phosphopeptide binding domain 1 [Source:HGNC Symbol;Acc:HGNC:29408]
ENSG00000142661.19	58.9375	-2.07408	0.608587	2.00202e-05	0.00164571	TRUE	127294	ENSG00000142661	protein_coding	1	24056035	24112135	-1	MYOM3	myomesin 3 [Source:HGNC Symbol;Acc:HGNC:26679]
ENSG00000142677.4	6.95252	-5.58432	1.37601	4.7669e-08	1.47383e-05	TRUE	58985	ENSG00000142677	protein_coding	1	24119771	24143140	-1	IL22RA1	interleukin 22 receptor subunit alpha 1 [Source:HGNC Symbol;Acc:HGNC:13700]
ENSG00000143126.8	94.1187	1.42184	0.465672	9.41389e-05	0.00528479	TRUE	1952	ENSG00000143126	protein_coding	1	109249539	109275751	1	CELSR2	cadherin EGF LAG seven-pass G-type receptor 2 [Source:HGNC Symbol;Acc:HGNC:3231]
ENSG00000143353.12	121.552	1.40779	0.280105	2.64669e-08	9.55182e-06	TRUE	127018	ENSG00000143353	protein_coding	1	219173869	219212865	1	LYPLAL1	lysophospholipase like 1 [Source:HGNC Symbol;Acc:HGNC:20440]
ENSG00000143355.16	1998.13	2.5204	0.640626	3.85201e-06	0.000472156	TRUE	56956	ENSG00000143355	protein_coding	1	197911902	197935478	1	LHX9	LIM homeobox 9 [Source:HGNC Symbol;Acc:HGNC:14222]
ENSG00000143367.17	444.672	1.38395	0.449245	8.93846e-05	0.00514979	TRUE	7286	ENSG00000143367	protein_coding	1	151540305	151583583	1	TUFT1	tuftelin 1 [Source:HGNC Symbol;Acc:HGNC:12422]
ENSG00000143375.15	2.90345	2.49167	1.43721	0.00236999	0.0489963	TRUE	57530	ENSG00000143375	protein_coding	1	151510510	151538692	1	CGN	cingulin [Source:HGNC Symbol;Acc:HGNC:17429]
ENSG00000143473.13	83.3165	3.46501	0.703857	3.20916e-08	1.0898e-05	TRUE	3756	ENSG00000143473	protein_coding	1	210676823	211134165	-1	KCNH1	potassium voltage-gated channel subfamily H member 1 [Source:HGNC Symbol;Acc:HGNC:6250]
ENSG00000143801.18	165.143	1.15295	0.446258	0.000411301	0.0152417	TRUE	5664	ENSG00000143801	protein_coding	1	226870184	226927726	1	PSEN2	presenilin 2 [Source:HGNC Symbol;Acc:HGNC:9509]
ENSG00000143995.20	542.504	-1.44647	0.358644	2.16743e-06	0.000305431	TRUE	4211	ENSG00000143995	protein_coding	2	66433452	66573869	1	MEIS1	Meis homeobox 1 [Source:HGNC Symbol;Acc:HGNC:7000]
ENSG00000144063.4	4678.42	-2.17234	0.488373	3.02407e-07	6.73588e-05	TRUE	7851	ENSG00000144063	protein_coding	2	110083870	110116022	-1	MALL	mal, T cell differentiation protein like [Source:HGNC Symbol;Acc:HGNC:6818]
ENSG00000144199.12	39.8919	1.3979	0.485738	0.000173382	0.0082947	TRUE	151313	ENSG00000144199	protein_coding	2	97083583	97094882	-1	FAHD2B	fumarylacetoacetate hydrolase domain containing 2B [Source:HGNC Symbol;Acc:HGNC:25318]
ENSG00000144229.13	12.208	4.62141	0.844041	4.39584e-09	1.97956e-06	TRUE	80731	ENSG00000144229	protein_coding	2	136765545	137677718	1	THSD7B	thrombospondin type 1 domain containing 7B [Source:HGNC Symbol;Acc:HGNC:29348]
ENSG00000144891.19	117.155	3.41872	0.531528	7.37733e-12	9.55133e-09	TRUE	185	ENSG00000144891	protein_coding	3	148697784	148743008	1	AGTR1	angiotensin II receptor type 1 [Source:HGNC Symbol;Acc:HGNC:336]
ENSG00000145390.12	702.986	1.00118	0.283262	2.06395e-05	0.00168991	TRUE	54532	ENSG00000145390	protein_coding	4	119212587	119295518	1	USP53	ubiquitin specific peptidase 53 [Source:HGNC Symbol;Acc:HGNC:29255]
ENSG00000145681.11	2037.68	1.3992	0.677639	0.00125345	0.0325787	TRUE	1404	ENSG00000145681	protein_coding	5	83637805	83720855	-1	HAPLN1	hyaluronan and proteoglycan link protein 1 [Source:HGNC Symbol;Acc:HGNC:2380]
ENSG00000145703.17	2.69053	4.2811	1.46564	2.99914e-05	0.00220309	TRUE	10788	ENSG00000145703	protein_coding	5	76403285	76708132	1	IQGAP2	IQ motif containing GTPase activating protein 2 [Source:HGNC Symbol;Acc:HGNC:6111]
ENSG00000145777.15	6.99326	5.59591	1.39762	3.85004e-08	1.24615e-05	TRUE	85480	ENSG00000145777	protein_coding	5	111070062	111078026	1	TSLP	thymic stromal lymphopoietin [Source:HGNC Symbol;Acc:HGNC:30743]
ENSG00000146281.6	130.934	1.16009	0.637076	0.00208401	0.045342	TRUE	135293	ENSG00000146281	protein_coding	6	89146055	89165565	1	PM20D2	peptidase M20 domain containing 2 [Source:HGNC Symbol;Acc:HGNC:21408]
ENSG00000147231.14	28.9861	-1.27135	0.677397	0.0014758	0.0360336	TRUE	55086	ENSG00000147231	protein_coding	X	106611930	106679439	1	RADX	RPA1 related single stranded DNA binding protein, X-linked [Source:HGNC Symbol;Acc:HGNC:25486]
ENSG00000147251.16	511.345	1.05496	0.276559	7.15712e-06	0.000764226	TRUE	139818	ENSG00000147251	protein_coding	X	118495815	118686163	1	DOCK11	dedicator of cytokinesis 11 [Source:HGNC Symbol;Acc:HGNC:23483]
ENSG00000148053.18	175.589	3.17341	1.25061	0.000321057	0.0128889	TRUE	4915	ENSG00000148053	protein_coding	9	84668375	85095751	1	NTRK2	neurotrophic receptor tyrosine kinase 2 [Source:HGNC Symbol;Acc:HGNC:8032]
ENSG00000148154.10	989.115	1.87033	0.216452	3.21464e-19	3.32956e-15	TRUE	7357	ENSG00000148154	protein_coding	9	111896814	111935369	1	UGCG	UDP-glucose ceramide glucosyltransferase [Source:HGNC Symbol;Acc:HGNC:12524]
ENSG00000148677.7	1879.29	2.76355	1.11727	0.000424988	0.0153909	TRUE	27063	ENSG00000148677	protein_coding	10	90912096	90921087	-1	ANKRD1	ankyrin repeat domain 1 [Source:HGNC Symbol;Acc:HGNC:15819]
ENSG00000149201.10	68.6032	2.52645	0.380972	1.537e-12	2.89445e-09	TRUE	60494	ENSG00000149201	protein_coding	11	86374736	86423109	1	CCDC81	coiled-coil domain containing 81 [Source:HGNC Symbol;Acc:HGNC:26281]
ENSG00000149380.12	660.642	-1.57959	0.442811	1.27688e-05	0.00117558	TRUE	283208	ENSG00000149380	protein_coding	11	74235801	74311640	-1	P4HA3	prolyl 4-hydroxylase subunit alpha 3 [Source:HGNC Symbol;Acc:HGNC:30135]
ENSG00000149564.12	39.0193	5.32283	1.72012	6.44659e-05	0.00402233	TRUE	90952	ENSG00000149564	protein_coding	11	124752583	124762290	-1	ESAM	endothelial cell adhesion molecule [Source:HGNC Symbol;Acc:HGNC:17474]
ENSG00000150347.17	2434.32	1.01561	0.241938	1.45944e-06	0.000222296	TRUE	84159	ENSG00000150347	protein_coding	10	61901684	62096944	1	ARID5B	AT-rich interaction domain 5B [Source:HGNC Symbol;Acc:HGNC:17362]
ENSG00000150394.14	134.868	3.57735	0.756812	1.12905e-07	3.11844e-05	TRUE	1006	ENSG00000150394	protein_coding	16	61647242	62037035	-1	CDH8	cadherin 8 [Source:HGNC Symbol;Acc:HGNC:1767]
ENSG00000150687.12	14150.1	1.49151	0.379806	4.58659e-06	0.000545364	TRUE	11098	ENSG00000150687	protein_coding	11	86791059	86952910	1	PRSS23	serine protease 23 [Source:HGNC Symbol;Acc:HGNC:14370]
ENSG00000151012.13	721.132	1.81336	0.396389	2.45373e-07	5.64767e-05	TRUE	23657	ENSG00000151012	protein_coding	4	138164097	138242349	-1	SLC7A11	solute carrier family 7 member 11 [Source:HGNC Symbol;Acc:HGNC:11059]
ENSG00000151150.22	43.4166	2.40649	0.763942	5.43372e-05	0.00356201	TRUE	288	ENSG00000151150	protein_coding	10	60026298	60733490	-1	ANK3	ankyrin 3 [Source:HGNC Symbol;Acc:HGNC:494]
ENSG00000152078.10	20.4914	1.64933	0.861011	0.00162885	0.0381034	TRUE	148534	ENSG00000152078	protein_coding	1	95117355	95197607	1	TLCD4	TLC domain containing 4 [Source:HGNC Symbol;Acc:HGNC:26477]
ENSG00000152284.5	322.746	1.02314	0.288735	2.11476e-05	0.00171793	TRUE	83439	ENSG00000152284	protein_coding	2	85133392	85310387	1	TCF7L1	transcription factor 7 like 1 [Source:HGNC Symbol;Acc:HGNC:11640]
ENSG00000152580.9	52.2156	1.6386	0.758256	0.000946079	0.0265196	TRUE	285313	ENSG00000152580	protein_coding	3	151425384	151461061	-1	IGSF10	immunoglobulin superfamily member 10 [Source:HGNC Symbol;Acc:HGNC:26384]
ENSG00000152804.11	13.8461	2.09902	0.800146	0.000326562	0.0129569	TRUE	3087	ENSG00000152804	protein_coding	10	92689955	92695647	1	HHEX	hematopoietically expressed homeobox [Source:HGNC Symbol;Acc:HGNC:4901]
ENSG00000153684.16	13.9127	-2.71955	0.755682	1.17333e-05	0.00110817	TRUE	100132565	ENSG00000153684	protein_coding	15	28378621	28392021	1	GOLGA8F	golgin A8 family member F [Source:HGNC Symbol;Acc:HGNC:32378]
ENSG00000153930.13	39.6514	2.35322	1.5159	0.00227865	0.047824	TRUE	162282	ENSG00000153930	protein_coding	17	55882301	56517016	1	ANKFN1	ankyrin repeat and fibronectin type III domain containing 1 [Source:HGNC Symbol;Acc:HGNC:26766]
ENSG00000153976.3	486.517	-1.95826	0.445312	4.01827e-07	8.32385e-05	TRUE	9955	ENSG00000153976	protein_coding	17	13494032	13601929	-1	HS3ST3A1	heparan sulfate-glucosamine 3-sulfotransferase 3A1 [Source:HGNC Symbol;Acc:HGNC:5196]
ENSG00000154175.18	4154.17	3.42524	0.528485	5.33164e-12	7.62741e-09	TRUE	25890	ENSG00000154175	protein_coding	3	100749156	100993515	-1	ABI3BP	ABI family member 3 binding protein [Source:HGNC Symbol;Acc:HGNC:17265]
ENSG00000154217.16	325.265	-1.54009	0.373179	1.4282e-06	0.000220862	TRUE	26207	ENSG00000154217	protein_coding	17	67377281	67697256	1	PITPNC1	phosphatidylinositol transfer protein cytoplasmic 1 [Source:HGNC Symbol;Acc:HGNC:21045]
ENSG00000154529.15	40.44	4.38036	2.11592	0.000723275	0.0218088	TRUE	728577	ENSG00000154529	protein_coding	9	41890314	42129510	-1	CNTNAP3B	contactin associated protein family member 3B [Source:HGNC Symbol;Acc:HGNC:32035]
ENSG00000154856.13	367.222	2.55293	0.763551	3.33803e-05	0.00240095	TRUE	147495	ENSG00000154856	protein_coding	18	10454635	10489949	1	APCDD1	APC down-regulated 1 [Source:HGNC Symbol;Acc:HGNC:15718]
ENSG00000154864.14	155.57	2.29117	0.817371	0.000189465	0.0088997	TRUE	63895	ENSG00000154864	protein_coding	18	10666483	11149569	-1	PIEZO2	piezo type mechanosensitive ion channel component 2 [Source:HGNC Symbol;Acc:HGNC:26270]
ENSG00000155016.18	394.158	1.20789	0.456958	0.000337996	0.0132606	TRUE	113612	ENSG00000155016	protein_coding	4	107931549	107953461	1	CYP2U1	cytochrome P450 family 2 subfamily U member 1 [Source:HGNC Symbol;Acc:HGNC:20582]
ENSG00000155719.18	4.76425	-3.35548	1.08319	0.000116399	0.00613539	TRUE	146183	ENSG00000155719	protein_coding	16	21663968	21761935	1	OTOA	otoancorin [Source:HGNC Symbol;Acc:HGNC:16378]
ENSG00000156011.18	1303.26	1.10552	0.245114	3.61434e-07	7.79907e-05	TRUE	23362	ENSG00000156011	protein_coding	8	18527303	19084730	-1	PSD3	pleckstrin and Sec7 domain containing 3 [Source:HGNC Symbol;Acc:HGNC:19093]
ENSG00000156049.7	9.5346	3.8647	1.15213	6.61474e-05	0.00410252	TRUE	9630	ENSG00000156049	protein_coding	9	77423079	77648322	-1	GNA14	G protein subunit alpha 14 [Source:HGNC Symbol;Acc:HGNC:4382]
ENSG00000156265.16	167.804	1.5517	0.38851	3.16169e-06	0.00040934	TRUE	56911	ENSG00000156265	protein_coding	21	29077471	29175889	1	MAP3K7CL	MAP3K7 C-terminal like [Source:HGNC Symbol;Acc:HGNC:16457]
ENSG00000156675.16	126.125	1.22874	0.626775	0.00155643	0.0371874	TRUE	80223	ENSG00000156675	protein_coding	8	37858618	37899497	-1	RAB11FIP1	RAB11 family interacting protein 1 [Source:HGNC Symbol;Acc:HGNC:30265]
ENSG00000157193.18	474.568	-1.57446	0.368278	7.51166e-07	0.000141458	TRUE	7804	ENSG00000157193	protein_coding	1	53242364	53328469	-1	LRP8	LDL receptor related protein 8 [Source:HGNC Symbol;Acc:HGNC:6700]
ENSG00000157399.17	25.8965	1.65292	1.0103	0.00236727	0.0489891	TRUE	415	ENSG00000157399	protein_coding	X	2934045	2968475	-1	ARSL	arylsulfatase L [Source:HGNC Symbol;Acc:HGNC:719]
ENSG00000157404.17	407.248	1.69524	0.464164	1.17796e-05	0.00110817	TRUE	3815	ENSG00000157404	protein_coding	4	54657267	54740783	1	KIT	KIT proto-oncogene, receptor tyrosine kinase [Source:HGNC Symbol;Acc:HGNC:6342]
ENSG00000157554.20	113.862	-2.51909	0.765471	2.75214e-05	0.00207311	TRUE	2078	ENSG00000157554	protein_coding	21	38380027	38661780	-1	ERG	ETS transcription factor ERG [Source:HGNC Symbol;Acc:HGNC:3446]
ENSG00000158220.14	70.5068	-1.69948	0.485695	1.6384e-05	0.00140246	TRUE	83850	ENSG00000158220	protein_coding	3	138434586	138481686	1	ESYT3	extended synaptotagmin 3 [Source:HGNC Symbol;Acc:HGNC:24295]
ENSG00000158296.14	26.5076	-2.17693	0.465259	1.3026e-07	3.40877e-05	TRUE	64849	ENSG00000158296	protein_coding	20	46557823	46684467	-1	SLC13A3	solute carrier family 13 member 3 [Source:HGNC Symbol;Acc:HGNC:14430]
ENSG00000158560.14	47.9774	-1.20855	0.570561	0.000980542	0.0271188	TRUE	1780	ENSG00000158560	protein_coding	7	95772506	96110322	1	DYNC1I1	dynein cytoplasmic 1 intermediate chain 1 [Source:HGNC Symbol;Acc:HGNC:2963]
ENSG00000162409.12	62.3959	1.87405	0.443677	1.13596e-06	0.000186757	TRUE	5563	ENSG00000162409	protein_coding	1	56645314	56715335	1	PRKAA2	protein kinase AMP-activated catalytic subunit alpha 2 [Source:HGNC Symbol;Acc:HGNC:9377]
ENSG00000162630.6	149.921	2.09825	1.07883	0.00132096	0.0335751	TRUE	8707	ENSG00000162630	protein_coding	1	193178730	193186613	-1	B3GALT2	beta-1,3-galactosyltransferase 2 [Source:HGNC Symbol;Acc:HGNC:917]
ENSG00000162722.9	45.1695	4.11666	1.78114	0.000509646	0.017091	TRUE	25893	ENSG00000162722	protein_coding	1	247857187	247880138	1	TRIM58	tripartite motif containing 58 [Source:HGNC Symbol;Acc:HGNC:24150]
ENSG00000162757.4	162.594	-1.05559	0.276412	6.25898e-06	0.000686004	TRUE	148304	ENSG00000162757	protein_coding	1	209779208	209784559	-1	C1orf74	chromosome 1 open reading frame 74 [Source:HGNC Symbol;Acc:HGNC:26319]
ENSG00000162772.17	130.903	2.91128	0.40574	3.95507e-14	1.16572e-10	TRUE	467	ENSG00000162772	protein_coding	1	212565334	212620777	1	ATF3	activating transcription factor 3 [Source:HGNC Symbol;Acc:HGNC:785]
ENSG00000162849.16	303.278	-1.37893	0.750371	0.00141127	0.0349909	TRUE	55083	ENSG00000162849	protein_coding	1	245154985	245709432	1	KIF26B	kinesin family member 26B [Source:HGNC Symbol;Acc:HGNC:25484]
ENSG00000163017.14	202.215	4.82732	0.876859	2.16121e-09	1.14794e-06	TRUE	72	ENSG00000163017	protein_coding	2	73892314	73919865	1	ACTG2	actin gamma 2, smooth muscle [Source:HGNC Symbol;Acc:HGNC:145]
ENSG00000163132.8	457.041	-1.78444	0.482329	7.37322e-06	0.000779267	TRUE	4487	ENSG00000163132	protein_coding	4	4859665	4863936	1	MSX1	msh homeobox 1 [Source:HGNC Symbol;Acc:HGNC:7391]
ENSG00000163347.6	28.7339	4.17098	1.60777	3.67552e-05	0.0026053	TRUE	9076	ENSG00000163347	protein_coding	3	190305707	190322446	-1	CLDN1	claudin 1 [Source:HGNC Symbol;Acc:HGNC:2032]
ENSG00000163485.17	66.565	-1.48378	0.617152	0.000456781	0.0160696	TRUE	134	ENSG00000163485	protein_coding	1	203090654	203167405	1	ADORA1	adenosine A1 receptor [Source:HGNC Symbol;Acc:HGNC:262]
ENSG00000163694.15	24.5508	-1.55146	0.57625	0.000234461	0.010225	TRUE	54502	ENSG00000163694	protein_coding	4	40423267	40630875	-1	RBM47	RNA binding motif protein 47 [Source:HGNC Symbol;Acc:HGNC:30358]
ENSG00000163739.5	42.9768	-1.6437	0.744304	0.000671078	0.0206029	TRUE	2919	ENSG00000163739	protein_coding	4	73869393	73871308	1	CXCL1	C-X-C motif chemokine ligand 1 [Source:HGNC Symbol;Acc:HGNC:4602]
ENSG00000163820.16	776.617	1.37872	0.241237	6.15804e-10	3.98637e-07	TRUE	79443	ENSG00000163820	protein_coding	3	45917903	45995824	-1	FYCO1	FYVE and coiled-coil domain autophagy adaptor 1 [Source:HGNC Symbol;Acc:HGNC:14673]
ENSG00000163909.8	23.9493	3.35738	0.797934	1.39269e-06	0.000218558	TRUE	26508	ENSG00000163909	protein_coding	1	39623435	39639643	-1	HEYL	hes related family bHLH transcription factor with YRPW motif like [Source:HGNC Symbol;Acc:HGNC:4882]
ENSG00000164093.18	619.887	-1.27714	0.288754	4.27382e-07	8.76557e-05	TRUE	5308	ENSG00000164093	protein_coding	4	110617423	110642123	-1	PITX2	paired like homeodomain 2 [Source:HGNC Symbol;Acc:HGNC:9005]
ENSG00000164106.8	61.3768	2.19082	0.754718	0.000132801	0.00677577	TRUE	11341	ENSG00000164106	protein_coding	4	173384701	173406380	-1	SCRG1	stimulator of chondrogenesis 1 [Source:HGNC Symbol;Acc:HGNC:17036]
ENSG00000164220.7	507.506	4.26484	0.850154	2.67442e-08	9.55182e-06	TRUE	2151	ENSG00000164220	protein_coding	5	76615482	76623413	-1	F2RL2	coagulation factor II thrombin receptor like 2 [Source:HGNC Symbol;Acc:HGNC:3539]
ENSG00000164318.18	49.4472	3.62505	1.63083	0.000595298	0.0191484	TRUE	133584	ENSG00000164318	protein_coding	5	38258409	38465480	1	EGFLAM	EGF like, fibronectin type III and laminin G domains [Source:HGNC Symbol;Acc:HGNC:26810]
ENSG00000164330.17	309.634	1.6547	0.519216	6.16869e-05	0.00389453	TRUE	1879	ENSG00000164330	protein_coding	5	158695916	159099916	-1	EBF1	EBF transcription factor 1 [Source:HGNC Symbol;Acc:HGNC:3126]
ENSG00000164379.7	9.2318	-3.47728	0.841736	2.3213e-06	0.000322724	TRUE	94234	ENSG00000164379	protein_coding	6	1312098	1314758	1	FOXQ1	forkhead box Q1 [Source:HGNC Symbol;Acc:HGNC:20951]
ENSG00000164674.17	192.224	-1.38008	0.384525	1.28583e-05	0.00117858	TRUE	94120	ENSG00000164674	protein_coding	6	158650014	158764876	1	SYTL3	synaptotagmin like 3 [Source:HGNC Symbol;Acc:HGNC:15587]
ENSG00000164684.13	53.3761	4.24118	0.794938	9.29153e-10	5.83255e-07	TRUE	619279	ENSG00000164684	protein_coding	8	80628451	80874781	-1	ZNF704	zinc finger protein 704 [Source:HGNC Symbol;Acc:HGNC:32291]
ENSG00000164764.11	241.127	4.12377	1.6035	0.0002673	0.0113698	TRUE	157869	ENSG00000164764	protein_coding	8	73064543	73124088	-1	SBSPON	somatomedin B and thrombospondin type 1 domain containing [Source:HGNC Symbol;Acc:HGNC:30362]
ENSG00000164850.16	239.12	-1.284	0.303809	1.04953e-06	0.000178205	TRUE	2852	ENSG00000164850	protein_coding	7	1082208	1093815	1	GPER1	G protein-coupled estrogen receptor 1 [Source:HGNC Symbol;Acc:HGNC:4485]
ENSG00000164932.13	2410.08	-1.23737	0.625145	0.00118741	0.0311751	TRUE	115908	ENSG00000164932	protein_coding	8	103371538	103382989	1	CTHRC1	collagen triple helix repeat containing 1 [Source:HGNC Symbol;Acc:HGNC:18831]
ENSG00000165072.10	184.432	3.88692	0.70111	1.40125e-09	8.06301e-07	TRUE	256691	ENSG00000165072	protein_coding	9	70043848	70226972	1	MAMDC2	MAM domain containing 2 [Source:HGNC Symbol;Acc:HGNC:23673]
ENSG00000165891.16	692.3	-1.32687	0.506003	0.000259395	0.0111114	TRUE	144455	ENSG00000165891	protein_coding	12	77021248	77065569	-1	E2F7	E2F transcription factor 7 [Source:HGNC Symbol;Acc:HGNC:23820]
ENSG00000166106.4	191.195	1.6883	0.722008	0.000641103	0.0199406	TRUE	170689	ENSG00000166106	protein_coding	11	130448645	130476645	1	ADAMTS15	ADAM metallopeptidase with thrombospondin type 1 motif 15 [Source:HGNC Symbol;Acc:HGNC:16305]
ENSG00000166228.9	288.443	1.23796	0.244465	2.33582e-08	8.79755e-06	TRUE	5092	ENSG00000166228	protein_coding	10	70882280	70888565	-1	PCBD1	pterin-4 alpha-carbinolamine dehydratase 1 [Source:HGNC Symbol;Acc:HGNC:8646]
ENSG00000166432.16	54.3724	2.74069	0.702093	4.00735e-06	0.000488307	TRUE	84460	ENSG00000166432	protein_coding	X	101882288	101932031	-1	ZMAT1	zinc finger matrin-type 1 [Source:HGNC Symbol;Acc:HGNC:29377]
ENSG00000166592.12	17.0505	1.86878	0.572683	5.16235e-05	0.00342751	TRUE	6236	ENSG00000166592	protein_coding	16	66921679	66925536	-1	RRAD	RRAD, Ras related glycolysis inhibitor and calcium channel regulator [Source:HGNC Symbol;Acc:HGNC:10446]
ENSG00000166670.10	40.9367	-3.01225	0.794779	5.18087e-06	0.000592407	TRUE	4319	ENSG00000166670	protein_coding	11	102770502	102780628	-1	MMP10	matrix metallopeptidase 10 [Source:HGNC Symbol;Acc:HGNC:7156]
ENSG00000166897.16	27.9378	-2.27443	0.552581	1.97961e-06	0.00028433	TRUE	114794	ENSG00000166897	protein_coding	22	37367960	37427479	-1	ELFN2	extracellular leucine rich repeat and fibronectin type III domain containing 2 [Source:HGNC Symbol;Acc:HGNC:29396]
ENSG00000167034.10	328.961	-2.51398	0.460848	1.77392e-09	9.91499e-07	TRUE	4824	ENSG00000167034	protein_coding	8	23678697	23682938	-1	NKX3-1	NK3 homeobox 1 [Source:HGNC Symbol;Acc:HGNC:7838]
ENSG00000167191.12	361.342	-3.46532	0.485858	3.66701e-14	1.16572e-10	TRUE	51704	ENSG00000167191	protein_coding	16	19856691	19886167	-1	GPRC5B	G protein-coupled receptor class C group 5 member B [Source:HGNC Symbol;Acc:HGNC:13308]
ENSG00000167641.11	167.825	2.47203	0.953772	0.000310157	0.0126474	TRUE	94274	ENSG00000167641	protein_coding	19	38251237	38256532	-1	PPP1R14A	protein phosphatase 1 regulatory inhibitor subunit 14A [Source:HGNC Symbol;Acc:HGNC:14871]
ENSG00000167642.13	89.4855	1.79141	0.712485	0.000412732	0.0152674	TRUE	10653	ENSG00000167642	protein_coding	19	38244035	38292615	1	SPINT2	serine peptidase inhibitor, Kunitz type 2 [Source:HGNC Symbol;Acc:HGNC:11247]
ENSG00000167912.7	45.205	2.20102	0.755673	0.000135034	0.00683919	TRUE	100505501	ENSG00000167912	lncRNA	8	59119040	59123478	1		novel transcript
ENSG00000168427.9	24.5039	1.76663	0.918831	0.00148477	0.0360922	TRUE	377007	ENSG00000168427	protein_coding	2	238138668	238152947	1	KLHL30	kelch like family member 30 [Source:HGNC Symbol;Acc:HGNC:24770]
ENSG00000168505.7	18.969	4.63986	1.64172	0.000144682	0.00723019	TRUE	2637	ENSG00000168505	protein_coding	2	236165236	236168386	-1	GBX2	gastrulation brain homeobox 2 [Source:HGNC Symbol;Acc:HGNC:4186]
ENSG00000168675.19	151.013	-2.50934	0.62469	1.90732e-06	0.000280214	TRUE	753	ENSG00000168675	protein_coding	18	13217498	13652755	1	LDLRAD4	low density lipoprotein receptor class A domain containing 4 [Source:HGNC Symbol;Acc:HGNC:1224]
ENSG00000168743.13	12.0491	2.75063	1.60992	0.00118159	0.0311079	TRUE	255743	ENSG00000168743	protein_coding	4	105894775	106004027	1	NPNT	nephronectin [Source:HGNC Symbol;Acc:HGNC:27405]
ENSG00000169432.19	504.383	1.47279	0.401145	1.13491e-05	0.00109347	TRUE	6335	ENSG00000169432	protein_coding	2	166195185	166376001	-1	SCN9A	sodium voltage-gated channel alpha subunit 9 [Source:HGNC Symbol;Acc:HGNC:10597]
ENSG00000169570.10	69.2971	1.07768	0.318432	3.31897e-05	0.00239556	TRUE	285605	ENSG00000169570	protein_coding	5	118836074	118988547	-1	DTWD2	DTW domain containing 2 [Source:HGNC Symbol;Acc:HGNC:19334]
ENSG00000169862.20	48.7223	7.16888	1.25508	5.74694e-10	3.84025e-07	TRUE	1501	ENSG00000169862	protein_coding	5	10971836	11904446	-1	CTNND2	catenin delta 2 [Source:HGNC Symbol;Acc:HGNC:2516]
ENSG00000169884.14	24.7793	-1.98114	0.740862	0.000213515	0.00961513	TRUE	7480	ENSG00000169884	protein_coding	12	48965340	48971735	-1	WNT10B	Wnt family member 10B [Source:HGNC Symbol;Acc:HGNC:12775]
ENSG00000169933.17	28.8026	2.67197	0.713025	7.20799e-06	0.000765711	TRUE	9758	ENSG00000169933	protein_coding	X	11822423	12724523	1	FRMPD4	FERM and PDZ domain containing 4 [Source:HGNC Symbol;Acc:HGNC:29007]
ENSG00000170421.13	287.561	1.44217	0.791787	0.00189284	0.0425273	TRUE	3856	ENSG00000170421	protein_coding	12	52897187	52949954	-1	KRT8	keratin 8 [Source:HGNC Symbol;Acc:HGNC:6446]
ENSG00000170571.12	198.848	2.33581	1.46603	0.002105	0.045612	TRUE	133418	ENSG00000170571	protein_coding	5	50396192	50443248	-1	EMB	embigin [Source:HGNC Symbol;Acc:HGNC:30465]
ENSG00000170745.12	75.816	-2.27819	0.536348	7.37919e-07	0.000140239	TRUE	3790	ENSG00000170745	protein_coding	2	17877847	18361616	1	KCNS3	potassium voltage-gated channel modifier subfamily S member 3 [Source:HGNC Symbol;Acc:HGNC:6302]
ENSG00000170909.14	20.0428	-1.27839	0.464092	0.000214324	0.00963063	TRUE	126014	ENSG00000170909	protein_coding	19	54094668	54102692	-1	OSCAR	osteoclast associated Ig-like receptor [Source:HGNC Symbol;Acc:HGNC:29960]
ENSG00000170959.15	6.43548	-2.73904	0.902006	0.000105691	0.00574645	TRUE	341019	ENSG00000170959	protein_coding	11	30830369	31369810	-1	DCDC1	doublecortin domain containing 1 [Source:HGNC Symbol;Acc:HGNC:20625]
ENSG00000170989.10	540.617	-1.8485	0.309938	1.03411e-10	8.9257e-08	TRUE	1901	ENSG00000170989	protein_coding	1	101236865	101243713	1	S1PR1	sphingosine-1-phosphate receptor 1 [Source:HGNC Symbol;Acc:HGNC:3165]
ENSG00000171130.19	202.976	1.34676	0.385752	2.36785e-05	0.00184398	TRUE	155066	ENSG00000171130	protein_coding	7	149872968	149891204	1	ATP6V0E2	ATPase H+ transporting V0 subunit e2 [Source:HGNC Symbol;Acc:HGNC:21723]
ENSG00000171385.10	103.868	2.3455	1.22571	0.00130907	0.0333547	TRUE	3752	ENSG00000171385	protein_coding	1	111770662	111989668	-1	KCND3	potassium voltage-gated channel subfamily D member 3 [Source:HGNC Symbol;Acc:HGNC:6239]
ENSG00000171509.16	3.44109	5.84879	2.68114	9.45746e-05	0.0052949	TRUE	59350	ENSG00000171509	protein_coding	4	158315311	158653372	1	RXFP1	relaxin family peptide receptor 1 [Source:HGNC Symbol;Acc:HGNC:19718]
ENSG00000171840.13	29.6789	-1.6283	0.451412	1.15466e-05	0.00110225	TRUE	4815	ENSG00000171840	protein_coding	12	564296	663589	-1	NINJ2	ninjurin 2 [Source:HGNC Symbol;Acc:HGNC:7825]
ENSG00000171877.21	85.6032	-2.60976	0.565065	1.53176e-07	3.86956e-05	TRUE	84978	ENSG00000171877	protein_coding	15	43870761	44195271	-1	FRMD5	FERM domain containing 5 [Source:HGNC Symbol;Acc:HGNC:28214]
ENSG00000171889.6	736.712	-1.44447	0.374439	4.43607e-06	0.000534263	TRUE	554202	ENSG00000171889	lncRNA	9	21453802	21559900	-1	MIR31HG	MIR31 host gene [Source:HGNC Symbol;Acc:HGNC:37187]
ENSG00000172403.11	6136.37	2.51449	0.547923	2.18947e-07	5.21321e-05	TRUE	171024	ENSG00000172403	protein_coding	4	118850688	119061247	1	SYNPO2	synaptopodin 2 [Source:HGNC Symbol;Acc:HGNC:17732]
ENSG00000172572.7	382.244	1.99019	0.620411	5.47249e-05	0.00357611	TRUE	5139	ENSG00000172572	protein_coding	12	20368537	20688583	1	PDE3A	phosphodiesterase 3A [Source:HGNC Symbol;Acc:HGNC:8778]
ENSG00000173114.13	276.446	2.23863	0.788948	0.000166238	0.00803656	TRUE	54674	ENSG00000173114	protein_coding	7	111091006	111125454	1	LRRN3	leucine rich repeat neuronal 3 [Source:HGNC Symbol;Acc:HGNC:17200]
ENSG00000173597.9	26.4203	5.53057	1.19317	3.78973e-08	1.2461e-05	TRUE	27284	ENSG00000173597	protein_coding	4	69721167	69787961	-1	SULT1B1	sulfotransferase family 1B member 1 [Source:HGNC Symbol;Acc:HGNC:17845]
ENSG00000173801.17	235.559	1.48659	0.59119	0.000435181	0.0155821	TRUE	3728	ENSG00000173801	protein_coding	17	41754604	41786931	-1	JUP	junction plakoglobin [Source:HGNC Symbol;Acc:HGNC:6207]
ENSG00000173918.15	168.117	-1.14409	0.650206	0.00183769	0.0417568	TRUE	114897	ENSG00000173918	protein_coding	17	79022814	79049788	1	C1QTNF1	C1q and TNF related 1 [Source:HGNC Symbol;Acc:HGNC:14324]
ENSG00000174669.12	10.5186	1.37397	0.744135	0.00191749	0.0429413	TRUE	3177	ENSG00000174669	protein_coding	11	66362521	66372214	-1	SLC29A2	solute carrier family 29 member 2 [Source:HGNC Symbol;Acc:HGNC:11004]
ENSG00000175567.11	118.54	1.50961	0.729775	0.00117757	0.0310745	TRUE	7351	ENSG00000175567	protein_coding	11	73974672	73982843	-1	UCP2	uncoupling protein 2 [Source:HGNC Symbol;Acc:HGNC:12518]
ENSG00000176435.7	485.401	2.82531	1.20332	0.000534311	0.0176809	TRUE	161198	ENSG00000176435	protein_coding	14	38254000	38256093	-1	CLEC14A	C-type lectin domain containing 14A [Source:HGNC Symbol;Acc:HGNC:19832]
ENSG00000176485.13	91.216	1.2957	0.720919	0.0020675	0.045321	TRUE	11145	ENSG00000176485	protein_coding	11	63573195	63616883	-1	PLAAT3	phospholipase A and acyltransferase 3 [Source:HGNC Symbol;Acc:HGNC:17825]
ENSG00000176771.18	79.0252	2.77775	0.72077	4.87178e-06	0.000570164	TRUE	344148	ENSG00000176771	protein_coding	2	132671788	133568463	-1	NCKAP5	NCK associated protein 5 [Source:HGNC Symbol;Acc:HGNC:29847]
ENSG00000176842.16	182.567	-1.21158	0.336014	1.29303e-05	0.00117996	TRUE	10265	ENSG00000176842	protein_coding	16	54930865	54934485	1	IRX5	iroquois homeobox 5 [Source:HGNC Symbol;Acc:HGNC:14361]
ENSG00000176845.13	1564.95	-1.18596	0.402077	0.000115865	0.00612283	TRUE	284207	ENSG00000176845	protein_coding	17	83079609	83095122	1	METRNL	meteorin like, glial cell differentiation regulator [Source:HGNC Symbol;Acc:HGNC:27584]
ENSG00000176928.7	221.939	1.20717	0.622901	0.00164618	0.0383152	TRUE	51301	ENSG00000176928	protein_coding	5	75025346	75052558	-1	GCNT4	glucosaminyl (N-acetyl) transferase 4 [Source:HGNC Symbol;Acc:HGNC:17973]
ENSG00000177363.5	214.082	2.5191	0.838913	9.99567e-05	0.00549232	TRUE	221091	ENSG00000177363	protein_coding	11	62686406	62689530	-1	LRRN4CL	LRRN4 C-terminal like [Source:HGNC Symbol;Acc:HGNC:33724]
ENSG00000177570.15	109.571	1.90992	1.11394	0.00198318	0.0439684	TRUE	401474	ENSG00000177570	protein_coding	8	118189455	118622112	-1	SAMD12	sterile alpha motif domain containing 12 [Source:HGNC Symbol;Acc:HGNC:31750]
ENSG00000177614.11	14.8866	-4.14865	0.949609	1.64924e-07	4.11614e-05	TRUE	79605	ENSG00000177614	protein_coding	1	230314490	230426332	-1	PGBD5	piggyBac transposable element derived 5 [Source:HGNC Symbol;Acc:HGNC:19405]
ENSG00000177679.16	43.9989	-1.54141	0.488946	5.36904e-05	0.00353078	TRUE	222183	ENSG00000177679	protein_coding	7	76201896	76287288	1	SRRM3	serine/arginine repetitive matrix 3 [Source:HGNC Symbol;Acc:HGNC:26729]
ENSG00000177822.9	217.909	-1.34854	0.483613	0.00017161	0.00822892	TRUE	NA	ENSG00000177822	lncRNA	4	181874438	182145249	-1	TENM3-AS1	TENM3 antisense RNA 1 [Source:HGNC Symbol;Acc:HGNC:28076]
ENSG00000177875.5	19.651	-1.25648	0.694037	0.00173973	0.0399982	TRUE	387856	ENSG00000177875	protein_coding	12	48183644	48185926	1	CCDC184	coiled-coil domain containing 184 [Source:HGNC Symbol;Acc:HGNC:33749]
ENSG00000178343.5	4.01378	2.81284	1.53328	0.00238211	0.0490999	TRUE	152573	ENSG00000178343	protein_coding	4	42397488	42402487	1	SHISA3	shisa family member 3 [Source:HGNC Symbol;Acc:HGNC:25159]
ENSG00000178718.7	98.7472	-1.11148	0.453157	0.000474958	0.0164803	TRUE	54913	ENSG00000178718	protein_coding	15	74954418	74956772	-1	RPP25	ribonuclease P and MRP subunit p25 [Source:HGNC Symbol;Acc:HGNC:30361]
ENSG00000178919.9	529.208	6.89093	1.11718	3.80126e-11	3.93716e-08	TRUE	2304	ENSG00000178919	protein_coding	9	97853226	97856717	1	FOXE1	forkhead box E1 [Source:HGNC Symbol;Acc:HGNC:3806]
ENSG00000179136.7	11.1419	3.24652	0.822975	3.81572e-06	0.000471905	TRUE	284034	ENSG00000179136	lncRNA	17	12549764	12642854	1	LINC00670	long intergenic non-protein coding RNA 670 [Source:HGNC Symbol;Acc:HGNC:44338]
ENSG00000179163.12	259.402	1.06317	0.471602	0.000953093	0.0266083	TRUE	2517	ENSG00000179163	protein_coding	1	23845077	23868290	-1	FUCA1	alpha-L-fucosidase 1 [Source:HGNC Symbol;Acc:HGNC:4006]
ENSG00000179772.8	16.8544	6.80303	1.62589	5.27127e-08	1.6058e-05	TRUE	2307	ENSG00000179772	protein_coding	20	31844303	31845604	-1	FOXS1	forkhead box S1 [Source:HGNC Symbol;Acc:HGNC:3735]
ENSG00000179869.15	47.1552	-3.62275	0.721394	1.63131e-08	6.37596e-06	TRUE	154664	ENSG00000179869	protein_coding	7	48171458	48647497	1	ABCA13	ATP binding cassette subfamily A member 13 [Source:HGNC Symbol;Acc:HGNC:14638]
ENSG00000180155.20	378.921	1.21237	0.559291	0.00108567	0.0292833	TRUE	66004	ENSG00000180155	protein_coding	8	142771197	142777810	-1	LYNX1	Ly6/neurotoxin 1 [Source:HGNC Symbol;Acc:HGNC:29604]
ENSG00000180332.7	14.3591	3.18821	0.948824	3.54827e-05	0.00252586	TRUE	386618	ENSG00000180332	protein_coding	13	45192853	45201045	-1	KCTD4	potassium channel tetramerization domain containing 4 [Source:HGNC Symbol;Acc:HGNC:23227]
ENSG00000181104.7	1703.98	2.12217	0.491585	8.03661e-07	0.000145673	TRUE	2149	ENSG00000181104	protein_coding	5	76716126	76735770	1	F2R	coagulation factor II thrombin receptor [Source:HGNC Symbol;Acc:HGNC:3537]
ENSG00000181291.8	8.27157	-4.02916	1.14679	2.35917e-05	0.00184398	TRUE	124842	ENSG00000181291	protein_coding	17	34579487	34639318	1	TMEM132E	transmembrane protein 132E [Source:HGNC Symbol;Acc:HGNC:26991]
ENSG00000181634.8	44.0206	7.32007	1.26445	3.55367e-11	3.87444e-08	TRUE	9966	ENSG00000181634	protein_coding	9	114784652	114806039	-1	TNFSF15	TNF superfamily member 15 [Source:HGNC Symbol;Acc:HGNC:11931]
ENSG00000181744.9	167.701	1.02044	0.402188	0.0004906	0.016798	TRUE	205428	ENSG00000181744	protein_coding	3	143971823	144048719	1	DIPK2A	divergent protein kinase domain 2A [Source:HGNC Symbol;Acc:HGNC:28490]
ENSG00000182022.18	141.66	1.99318	0.524572	6.38111e-06	0.000695709	TRUE	51363	ENSG00000182022	protein_coding	10	124007668	124093598	-1	CHST15	carbohydrate sulfotransferase 15 [Source:HGNC Symbol;Acc:HGNC:18137]
ENSG00000182253.15	353.99	1.62556	0.404673	2.93145e-06	0.000384335	TRUE	23336	ENSG00000182253	protein_coding	15	99098217	99135593	1	SYNM	synemin [Source:HGNC Symbol;Acc:HGNC:24466]
ENSG00000182287.15	854.488	1.49647	0.429684	2.2621e-05	0.00180228	TRUE	8905	ENSG00000182287	protein_coding	X	15825806	15854931	-1	AP1S2	adaptor related protein complex 1 subunit sigma 2 [Source:HGNC Symbol;Acc:HGNC:560]
ENSG00000182389.20	90.0384	3.26019	1.44436	0.000600545	0.0192574	TRUE	785	ENSG00000182389	protein_coding	2	151832771	152099167	-1	CACNB4	calcium voltage-gated channel auxiliary subunit beta 4 [Source:HGNC Symbol;Acc:HGNC:1404]
ENSG00000182575.8	280.869	-1.78846	0.619727	0.000110551	0.00596373	TRUE	11248	ENSG00000182575	protein_coding	17	49575871	49583827	1	NXPH3	neurexophilin 3 [Source:HGNC Symbol;Acc:HGNC:8077]
ENSG00000182585.10	199.154	2.95961	1.27037	0.000547552	0.0179755	TRUE	255324	ENSG00000182585	protein_coding	4	74308470	74316789	1	EPGN	epithelial mitogen [Source:HGNC Symbol;Acc:HGNC:17470]
ENSG00000182901.18	63.5747	2.80554	1.11548	0.000364671	0.0138923	TRUE	6000	ENSG00000182901	protein_coding	1	240767636	241357374	-1	RGS7	regulator of G protein signaling 7 [Source:HGNC Symbol;Acc:HGNC:10003]
ENSG00000183114.8	12.3564	-2.09694	0.779457	0.000225299	0.00999374	TRUE	163933	ENSG00000183114	protein_coding	1	20552573	20555020	1	FAM43B	family with sequence similarity 43 member B [Source:HGNC Symbol;Acc:HGNC:31791]
ENSG00000183775.11	196.633	3.55658	0.58467	6.50095e-11	6.12123e-08	TRUE	57528	ENSG00000183775	protein_coding	5	144170873	144485686	1	KCTD16	potassium channel tetramerization domain containing 16 [Source:HGNC Symbol;Acc:HGNC:29244]
ENSG00000183801.8	157.679	2.23884	0.643458	2.14553e-05	0.00172266	TRUE	283298	ENSG00000183801	protein_coding	11	7485388	7511377	1	OLFML1	olfactomedin like 1 [Source:HGNC Symbol;Acc:HGNC:24473]
ENSG00000184524.6	25.822	1.34719	0.611658	0.000899965	0.025538	TRUE	51286	ENSG00000184524	protein_coding	11	787115	790113	-1	CEND1	cell cycle exit and neuronal differentiation 1 [Source:HGNC Symbol;Acc:HGNC:24153]
ENSG00000184545.11	26.5137	1.14424	0.606324	0.00183276	0.0417206	TRUE	1850	ENSG00000184545	protein_coding	11	1554051	1572271	-1	DUSP8	dual specificity phosphatase 8 [Source:HGNC Symbol;Acc:HGNC:3074]
ENSG00000184860.10	20.1607	5.44626	1.20821	7.8585e-08	2.26096e-05	TRUE	93517	ENSG00000184860	protein_coding	16	81988855	82011481	-1	SDR42E1	short chain dehydrogenase/reductase family 42E, member 1 [Source:HGNC Symbol;Acc:HGNC:29834]
ENSG00000184995.7	44.482	-1.63467	0.294274	1.39681e-09	8.06301e-07	TRUE	338376	ENSG00000184995	protein_coding	9	21480839	21482313	-1	IFNE	interferon epsilon [Source:HGNC Symbol;Acc:HGNC:18163]
ENSG00000185013.16	16.8812	2.04397	0.565613	1.25556e-05	0.00116111	TRUE	93034	ENSG00000185013	protein_coding	2	18562872	18589572	-1	NT5C1B	5'-nucleotidase, cytosolic IB [Source:HGNC Symbol;Acc:HGNC:17818]
ENSG00000185112.6	388.558	1.5824	0.834088	0.00161614	0.0380003	TRUE	131583	ENSG00000185112	protein_coding	3	194685883	194689037	1	FAM43A	family with sequence similarity 43 member A [Source:HGNC Symbol;Acc:HGNC:26888]
ENSG00000185495.10	48.6217	1.10398	0.371033	0.000127897	0.00660693	TRUE	NA	ENSG00000185495	transcribed_unprocessed_pseudogene	1	223992743	224010612	1	SEPTIN7P13	septin 7 pseudogene 13 [Source:HGNC Symbol;Acc:HGNC:55092]
ENSG00000185972.6	92.5931	-1.37722	0.464579	0.000104308	0.00568617	TRUE	881	ENSG00000185972	protein_coding	9	36169388	36171334	1	CCIN	calicin [Source:HGNC Symbol;Acc:HGNC:1568]
ENSG00000186352.9	268.719	1.23132	0.578295	0.00113257	0.0303508	TRUE	353322	ENSG00000186352	protein_coding	4	185396021	185400628	1	ANKRD37	ankyrin repeat domain 37 [Source:HGNC Symbol;Acc:HGNC:29593]
ENSG00000187098.18	113.812	1.71968	0.826672	0.00106273	0.0287772	TRUE	4286	ENSG00000187098	protein_coding	3	69739456	69968336	1	MITF	melanocyte inducing transcription factor [Source:HGNC Symbol;Acc:HGNC:7105]
ENSG00000187123.15	352.199	1.74694	0.445627	4.1664e-06	0.000504719	TRUE	130574	ENSG00000187123	protein_coding	2	149329985	149474138	1	LYPD6	LY6/PLAUR domain containing 6 [Source:HGNC Symbol;Acc:HGNC:28751]
ENSG00000187193.9	389.442	-2.30769	0.525123	3.74593e-07	7.8961e-05	TRUE	4501	ENSG00000187193	protein_coding	16	56682470	56684196	1	MT1X	metallothionein 1X [Source:HGNC Symbol;Acc:HGNC:7405]
ENSG00000187800.14	1127.51	2.03154	0.431836	1.31645e-07	3.40877e-05	TRUE	375033	ENSG00000187800	protein_coding	1	156893698	156916429	1	PEAR1	platelet endothelial aggregation receptor 1 [Source:HGNC Symbol;Acc:HGNC:33631]
ENSG00000188152.13	9.68758	-1.03379	0.579787	0.00236189	0.0489756	TRUE	441457	ENSG00000188152	protein_coding	9	96928310	96940253	1	NUTM2G	NUT family member 2G [Source:HGNC Symbol;Acc:HGNC:23449]
ENSG00000188153.14	315.073	3.46484	1.13844	8.32487e-05	0.00489914	TRUE	1287	ENSG00000188153	protein_coding	X	108439838	108697545	1	COL4A5	collagen type IV alpha 5 chain [Source:HGNC Symbol;Acc:HGNC:2207]
ENSG00000188487.12	19.8322	-1.41543	0.540694	0.000327128	0.0129569	TRUE	387755	ENSG00000188487	protein_coding	11	15112424	15247208	1	INSC	INSC spindle orientation adaptor protein [Source:HGNC Symbol;Acc:HGNC:33116]
ENSG00000188783.6	1162.53	1.2563	0.713876	0.00228971	0.0479082	TRUE	5549	ENSG00000188783	protein_coding	1	203475806	203491352	1	PRELP	proline and arginine rich end leucine rich repeat protein [Source:HGNC Symbol;Acc:HGNC:9357]
ENSG00000189056.15	655.891	4.90649	1.05747	1.68938e-07	4.16613e-05	TRUE	5649	ENSG00000189056	protein_coding	7	103471381	103989658	-1	RELN	reelin [Source:HGNC Symbol;Acc:HGNC:9957]
ENSG00000189157.14	2.99831	2.31988	1.41972	0.00142579	0.035203	TRUE	100129583	ENSG00000189157	protein_coding	4	76214040	76283783	1	FAM47E	family with sequence similarity 47 member E [Source:HGNC Symbol;Acc:HGNC:34343]
ENSG00000196460.14	187.826	-1.24997	0.449807	0.000187541	0.00882935	TRUE	731220	ENSG00000196460	protein_coding	2	101397359	101475112	-1	RFX8	regulatory factor X8 [Source:HGNC Symbol;Acc:HGNC:37253]
ENSG00000196526.11	4193.66	1.06688	0.258039	1.93672e-06	0.000282529	TRUE	60312	ENSG00000196526	protein_coding	4	7758714	7939926	-1	AFAP1	actin filament associated protein 1 [Source:HGNC Symbol;Acc:HGNC:24017]
ENSG00000196668.4	3.45065	2.97223	1.22773	0.000636359	0.019877	TRUE	100287569	ENSG00000196668	lncRNA	12	116533422	116536518	1	LINC00173	long intergenic non-protein coding RNA 173 [Source:HGNC Symbol;Acc:HGNC:33791]
ENSG00000197077.14	174.434	3.26642	0.606749	3.61784e-09	1.70326e-06	TRUE	85379	ENSG00000197077	protein_coding	22	24952716	25197448	1	KIAA1671	KIAA1671 [Source:HGNC Symbol;Acc:HGNC:29345]
ENSG00000197106.7	143.838	-2.18971	0.533244	1.33776e-06	0.000213167	TRUE	388662	ENSG00000197106	protein_coding	1	110150494	110202202	1	SLC6A17	solute carrier family 6 member 17 [Source:HGNC Symbol;Acc:HGNC:31399]
ENSG00000197321.16	705.623	1.40988	0.571347	0.000515034	0.0171802	TRUE	6840	ENSG00000197321	protein_coding	10	29457338	29736959	-1	SVIL	supervillin [Source:HGNC Symbol;Acc:HGNC:11480]
ENSG00000197442.10	288.513	1.13852	0.358742	7.09321e-05	0.00430897	TRUE	4217	ENSG00000197442	protein_coding	6	136557046	136792477	-1	MAP3K5	mitogen-activated protein kinase kinase kinase 5 [Source:HGNC Symbol;Acc:HGNC:6857]
ENSG00000197461.13	155.998	1.43841	0.336749	9.71154e-07	0.000169054	TRUE	5154	ENSG00000197461	protein_coding	7	497258	520296	-1	PDGFA	platelet derived growth factor subunit A [Source:HGNC Symbol;Acc:HGNC:8799]
ENSG00000197467.17	801.256	-1.58828	0.475714	2.84455e-05	0.00212725	TRUE	1305	ENSG00000197467	protein_coding	10	69801880	69964275	1	COL13A1	collagen type XIII alpha 1 chain [Source:HGNC Symbol;Acc:HGNC:2190]
ENSG00000197558.13	6.01035	3.56215	1.8272	0.000315731	0.0127617	TRUE	NA	ENSG00000197558	transcribed_unitary_pseudogene	7	149776042	149833979	1	SSPOP	SCO-spondin, pseudogene [Source:HGNC Symbol;Acc:HGNC:21998]
ENSG00000197565.17	15.9745	7.02084	1.41073	1.92604e-11	2.21655e-08	TRUE	1288	ENSG00000197565	protein_coding	X	108155607	108439497	-1	COL4A6	collagen type IV alpha 6 chain [Source:HGNC Symbol;Acc:HGNC:2208]
ENSG00000197594.14	2109.63	-1.38702	0.734808	0.0013256	0.0336104	TRUE	5167	ENSG00000197594	protein_coding	6	131808016	131895155	1	ENPP1	ectonucleotide pyrophosphatase/phosphodiesterase 1 [Source:HGNC Symbol;Acc:HGNC:3356]
ENSG00000197632.9	820.513	3.79556	0.734097	1.20441e-08	5.0917e-06	TRUE	5055	ENSG00000197632	protein_coding	18	63871692	63903888	1	SERPINB2	serpin family B member 2 [Source:HGNC Symbol;Acc:HGNC:8584]
ENSG00000197852.12	338.689	2.97286	0.544927	2.45078e-09	1.20876e-06	TRUE	55924	ENSG00000197852	protein_coding	1	111680630	111755824	-1	INKA2	inka box actin regulator 2 [Source:HGNC Symbol;Acc:HGNC:28045]
ENSG00000197977.4	14.4722	1.49488	0.735833	0.00140823	0.0349909	TRUE	54898	ENSG00000197977	protein_coding	6	10980759	11044305	-1	ELOVL2	ELOVL fatty acid elongase 2 [Source:HGNC Symbol;Acc:HGNC:14416]
ENSG00000198053.12	3404.23	-1.10855	0.344509	5.20703e-05	0.00344612	TRUE	140885	ENSG00000198053	protein_coding	20	1894167	1940592	1	SIRPA	signal regulatory protein alpha [Source:HGNC Symbol;Acc:HGNC:9662]
ENSG00000198768.11	1277.25	-1.33574	0.648627	0.00096562	0.0268173	TRUE	164284	ENSG00000198768	protein_coding	20	58459101	58515399	-1	APCDD1L	APC down-regulated 1 like [Source:HGNC Symbol;Acc:HGNC:26892]
ENSG00000198814.14	151.071	-1.46955	0.352897	1.27258e-06	0.000205949	TRUE	2710	ENSG00000198814	protein_coding	X	30653359	30731462	1	GK	glycerol kinase [Source:HGNC Symbol;Acc:HGNC:4289]
ENSG00000203805.11	364.889	-1.44653	0.438387	3.42458e-05	0.00245468	TRUE	196051	ENSG00000203805	protein_coding	10	120457227	120592065	1	PLPP4	phospholipid phosphatase 4 [Source:HGNC Symbol;Acc:HGNC:23531]
ENSG00000204131.10	224.16	1.86635	0.404887	1.98575e-07	4.83939e-05	TRUE	392490	ENSG00000204131	protein_coding	X	71910845	72161750	1	NHSL2	NHS like 2 [Source:HGNC Symbol;Acc:HGNC:33737]
ENSG00000204131.10	224.16	1.86635	0.404887	1.98575e-07	4.83939e-05	TRUE	340527	ENSG00000204131	protein_coding	X	71910845	72161750	1	NHSL2	NHS like 2 [Source:HGNC Symbol;Acc:HGNC:33737]
ENSG00000204301.6	22.9211	-1.2364	0.451741	0.000226301	0.0100167	TRUE	4855	ENSG00000204301	protein_coding	6	32194843	32224067	-1	NOTCH4	notch receptor 4 [Source:HGNC Symbol;Acc:HGNC:7884]
ENSG00000204642.14	99.281	1.1424	0.635646	0.00217918	0.0465378	TRUE	3134	ENSG00000204642	protein_coding	6	29722775	29738528	1	HLA-F	major histocompatibility complex, class I, F [Source:HGNC Symbol;Acc:HGNC:4963]
ENSG00000204650.14	230.879	1.67764	0.435266	5.22105e-06	0.000592407	TRUE	147081	ENSG00000204650	transcribed_unitary_pseudogene	17	45620328	45655156	1	LINC02210	long intergenic non-protein coding RNA 2210 [Source:HGNC Symbol;Acc:HGNC:26327]
ENSG00000204745.4	83.3073	-1.20476	0.418527	0.000147366	0.00731655	TRUE	102724642	ENSG00000204745	unprocessed_pseudogene	2	87125198	87196629	1		anaphase promoting complex subunit 1 (ANAPC1) pseudogene
ENSG00000204963.6	11.9174	-1.49551	0.778485	0.00135942	0.0341338	TRUE	56141	ENSG00000204963	protein_coding	5	140834248	141012347	1	PCDHA7	protocadherin alpha 7 [Source:HGNC Symbol;Acc:HGNC:8673]
ENSG00000205364.4	94.2581	-1.70831	0.591352	0.000115699	0.00612283	TRUE	4499	ENSG00000205364	protein_coding	16	56632659	56633981	1	MT1M	metallothionein 1M [Source:HGNC Symbol;Acc:HGNC:14296]
ENSG00000205707.11	130.362	1.1356	0.42406	0.00031357	0.0127115	TRUE	144363	ENSG00000205707	protein_coding	12	25195216	25209645	1	ETFRF1	electron transfer flavoprotein regulatory factor 1 [Source:HGNC Symbol;Acc:HGNC:27052]
ENSG00000205923.3	52.9619	-1.09327	0.388454	0.000182322	0.00864256	TRUE	752014	ENSG00000205923	protein_coding	16	2530035	2531417	-1	CEMP1	cementum protein 1 [Source:HGNC Symbol;Acc:HGNC:32553]
ENSG00000213493.3	33.1262	1.57369	0.650025	0.000542798	0.0179045	TRUE	NA	ENSG00000213493	processed_pseudogene	4	116598161	116599611	1	ACTN4P1	actinin alpha 4 pseudogene 1 [Source:HGNC Symbol;Acc:HGNC:44028]
ENSG00000213856.3	9.08994	-1.23445	0.708996	0.00215906	0.0464045	TRUE	NA	ENSG00000213856	processed_pseudogene	X	49632500	49633349	-1	VDAC1P2	voltage dependent anion channel 1 pseudogene 2 [Source:HGNC Symbol;Acc:HGNC:12670]
ENSG00000213904.10	33.1472	1.74617	0.467926	7.72897e-06	0.000800528	TRUE	101930071	ENSG00000213904	lncRNA	19	42397114	42652355	1	LIPE-AS1	LIPE antisense RNA 1 [Source:HGNC Symbol;Acc:HGNC:48589]
ENSG00000213904.10	33.1472	1.74617	0.467926	7.72897e-06	0.000800528	TRUE	100996307	ENSG00000213904	lncRNA	19	42397114	42652355	1	LIPE-AS1	LIPE antisense RNA 1 [Source:HGNC Symbol;Acc:HGNC:48589]
ENSG00000214575.10	84.9603	-1.19241	0.494518	0.000497025	0.016934	TRUE	64506	ENSG00000214575	protein_coding	15	82543201	82648861	-1	CPEB1	cytoplasmic polyadenylation element binding protein 1 [Source:HGNC Symbol;Acc:HGNC:21744]
ENSG00000218336.9	5141.51	-1.31181	0.467807	0.000157933	0.00771597	TRUE	55714	ENSG00000218336	protein_coding	4	182143987	182803024	1	TENM3	teneurin transmembrane protein 3 [Source:HGNC Symbol;Acc:HGNC:29944]
ENSG00000221890.6	223.317	-1.37035	0.743132	0.00141434	0.0350036	TRUE	23467	ENSG00000221890	protein_coding	22	38818452	38844028	-1	NPTXR	neuronal pentraxin receptor [Source:HGNC Symbol;Acc:HGNC:7954]
ENSG00000223804.5	31.2672	1.54656	0.696129	0.000870442	0.024905	TRUE	NA	ENSG00000223804	transcribed_unprocessed_pseudogene	1	120267334	120341871	-1		Poly [ADP-ribose] polymerase 8 (PARP8) pseudogene
ENSG00000224063.6	5.81754	2.21268	1.64792	0.00188419	0.0423789	TRUE	NA	ENSG00000224063	lncRNA	2	187003220	187556288	1		novel transcript, antisense to TFPI and CALCRL
ENSG00000224934.6	29.8087	-1.00243	0.529401	0.00160588	0.0378641	TRUE	NA	ENSG00000224934	lncRNA	10	99430915	99463259	1		novel transcript
ENSG00000225206.11	223.768	1.17626	0.467135	0.000478059	0.0165602	TRUE	400765	ENSG00000225206	lncRNA	1	97933474	98049863	-1	MIR137HG	MIR137 host gene [Source:HGNC Symbol;Acc:HGNC:42871]
ENSG00000225938.2	16.1617	-1.49345	0.518035	0.000148486	0.007341	TRUE	NA	ENSG00000225938	lncRNA	1	101234555	101236624	-1		novel transcript
ENSG00000226674.11	7.28059	4.26201	0.981261	1.13508e-06	0.000186757	TRUE	401014	ENSG00000226674	lncRNA	2	144666312	145262988	1	TEX41	testis expressed 41 [Source:HGNC Symbol;Acc:HGNC:48667]
ENSG00000226808.3	36.3056	1.8205	0.500302	1.20744e-05	0.00112162	TRUE	100506835	ENSG00000226808	lncRNA	10	43778946	43901004	1	LINC00840	long intergenic non-protein coding RNA 840 [Source:HGNC Symbol;Acc:HGNC:44987]
ENSG00000227036.9	104.273	-1.15703	0.44615	0.000325708	0.0129569	TRUE	100499467	ENSG00000227036	lncRNA	17	72290091	72640472	-1	LINC00511	long intergenic non-protein coding RNA 511 [Source:HGNC Symbol;Acc:HGNC:43564]
ENSG00000227036.9	104.273	-1.15703	0.44615	0.000325708	0.0129569	TRUE	400619	ENSG00000227036	lncRNA	17	72290091	72640472	-1	LINC00511	long intergenic non-protein coding RNA 511 [Source:HGNC Symbol;Acc:HGNC:43564]
ENSG00000227811.3	16.5848	2.08951	0.62618	3.85666e-05	0.00270816	TRUE	NA	ENSG00000227811	lncRNA	1	111739579	111747798	1	INKA2-AS1	INKA2 antisense RNA 1 [Source:HGNC Symbol;Acc:HGNC:49446]
ENSG00000228434.1	34.2692	-1.14463	0.289477	3.82718e-06	0.000471905	TRUE	NA	ENSG00000228434	lncRNA	7	44004046	44007866	-1		novel transcript
ENSG00000228501.2	29.937	2.35201	0.588307	3.07037e-06	0.000400017	TRUE	NA	ENSG00000228501	processed_pseudogene	13	100150481	100151092	-1	RPL15P18	ribosomal protein L15 pseudogene 18 [Source:HGNC Symbol;Acc:HGNC:36515]
ENSG00000229047.1	16.1399	1.72545	0.550937	7.19312e-05	0.00435493	TRUE	NA	ENSG00000229047	lncRNA	21	14961309	14964233	1		novel transcript
ENSG00000229619.5	545.83	1.2429	0.349984	1.86087e-05	0.00155435	TRUE	401093	ENSG00000229619	lncRNA	3	152245262	152269565	-1	MBNL1-AS1	MBNL1 antisense RNA 1 [Source:HGNC Symbol;Acc:HGNC:44584]
ENSG00000230417.12	223.572	-1.3353	0.579934	0.000590818	0.0190339	TRUE	100132987	ENSG00000230417	lncRNA	10	78179185	78551355	1	LINC00595	long intergenic non-protein coding RNA 595 [Source:HGNC Symbol;Acc:HGNC:31430]
ENSG00000230417.12	223.572	-1.3353	0.579934	0.000590818	0.0190339	TRUE	414243	ENSG00000230417	lncRNA	10	78179185	78551355	1	LINC00595	long intergenic non-protein coding RNA 595 [Source:HGNC Symbol;Acc:HGNC:31430]
ENSG00000230699.2	48.4447	-1.40101	0.665397	0.000888263	0.0253229	TRUE	NA	ENSG00000230699	lncRNA	1	911435	914948	1		novel transcript
ENSG00000231290.6	129.614	-2.01699	0.489777	1.3564e-06	0.000214487	TRUE	149773	ENSG00000231290	lncRNA	20	58515379	58619888	1	APCDD1L-DT	APCDD1L divergent transcript [Source:HGNC Symbol;Acc:HGNC:27152]
ENSG00000231312.8	65.7297	1.03171	0.286957	1.74687e-05	0.00148305	TRUE	NA	ENSG00000231312	lncRNA	2	39436530	39665343	1	MAP4K3-DT	MAP4K3 divergent transcript [Source:HGNC Symbol;Acc:HGNC:54056]
ENSG00000232727.2	13.0208	2.6024	0.966104	0.000270636	0.0114413	TRUE	NA	ENSG00000232727	processed_pseudogene	7	64433830	64434592	1	YWHAEP1	tyrosine 3-monooxygenase/tryptophan 5-monooxygenase activation protein epsilon pseudogene 1 [Source:HGNC Symbol;Acc:HGNC:49442]
ENSG00000233058.3	14.8942	1.62679	0.530978	9.94797e-05	0.00548065	TRUE	NA	ENSG00000233058	lncRNA	3	194487140	194521156	1	LINC00884	long intergenic non-protein coding RNA 884 [Source:HGNC Symbol;Acc:HGNC:48570]
ENSG00000233098.10	20.7184	2.35514	0.905745	0.000295191	0.0122298	TRUE	440416	ENSG00000233098	lncRNA	17	20868433	21002276	1	CCDC144NL-AS1	CCDC144NL antisense RNA 1 [Source:HGNC Symbol;Acc:HGNC:51340]
ENSG00000233098.10	20.7184	2.35514	0.905745	0.000295191	0.0122298	TRUE	339260	ENSG00000233098	lncRNA	17	20868433	21002276	1	CCDC144NL-AS1	CCDC144NL antisense RNA 1 [Source:HGNC Symbol;Acc:HGNC:51340]
ENSG00000233296.2	27.9869	2.89739	1.19643	0.000462119	0.0161703	TRUE	NA	ENSG00000233296	lncRNA	2	677186	697382	1	TMEM18-DT	TMEM18 divergent transcript [Source:HGNC Symbol;Acc:HGNC:54481]
ENSG00000234810.4	8.9561	2.03586	1.03637	0.00146409	0.035807	TRUE	NA	ENSG00000234810	lncRNA	1	55329288	56070513	1		novel transcript
ENSG00000235605.1	8.75206	2.42406	0.951531	0.00037102	0.014025	TRUE	NA	ENSG00000235605	processed_pseudogene	1	234356704	234357141	-1		ribosomal protein S15 (RPS15) pseudogene
ENSG00000236130.2	4.44015	5.97297	2.70097	7.76518e-05	0.00466249	TRUE	101928337	ENSG00000236130	lncRNA	9	97699625	97853080	-1	PTCSC2	papillary thyroid carcinoma susceptibility candidate 2 [Source:HGNC Symbol;Acc:HGNC:44086]
ENSG00000236304.2	3.8366	1.80853	0.98844	0.00237936	0.0490922	TRUE	NA	ENSG00000236304	lncRNA	11	76656984	76663866	1		novel transcript
ENSG00000236609.4	8.84681	2.29249	1.00388	0.000725948	0.0218576	TRUE	54753	ENSG00000236609	protein_coding	7	6615610	6624290	1	ZNF853	zinc finger protein 853 [Source:HGNC Symbol;Acc:HGNC:21767]
ENSG00000236876.3	6.19771	2.27524	1.22857	0.0018499	0.0418951	TRUE	NA	ENSG00000236876	processed_pseudogene	1	42500205	42500339	-1	TMSB4XP1	TMSB4X pseudogene 1 [Source:HGNC Symbol;Acc:HGNC:11883]
ENSG00000237749.4	12.9137	3.09143	1.33238	0.000628424	0.0197982	TRUE	NA	ENSG00000237749	processed_pseudogene	1	37556247	37556499	1		ribosomal protein S27 (metallopanstimulin 1) (RPS27) pseudogene
ENSG00000237807.4	141.549	1.03294	0.443486	0.000786954	0.0231645	TRUE	100507516	ENSG00000237807	lncRNA	8	53493523	53524336	-1		novel transcript
ENSG00000240065.8	88.6327	1.19037	0.471514	0.000469892	0.0163593	TRUE	5698	ENSG00000240065	protein_coding	6	32844136	32859851	1	PSMB9	proteasome 20S subunit beta 9 [Source:HGNC Symbol;Acc:HGNC:9546]
ENSG00000240476.1	3.93694	2.55792	1.18462	0.0014545	0.0356989	TRUE	NA	ENSG00000240476	lncRNA	3	98981058	98983096	1	LINC00973	long intergenic non-protein coding RNA 973 [Source:HGNC Symbol;Acc:HGNC:48868]
ENSG00000240583.14	1533.97	3.21366	0.834046	5.15501e-06	0.000592407	TRUE	358	ENSG00000240583	protein_coding	7	30911853	30925517	1	AQP1	aquaporin 1 (Colton blood group) [Source:HGNC Symbol;Acc:HGNC:633]
ENSG00000240694.9	204.675	2.81371	0.811308	2.29731e-05	0.00181636	TRUE	10687	ENSG00000240694	protein_coding	8	26504701	26514092	-1	PNMA2	PNMA family member 2 [Source:HGNC Symbol;Acc:HGNC:9159]
ENSG00000241945.8	136.057	-1.40548	0.641377	0.000775609	0.0230166	TRUE	5822	ENSG00000241945	protein_coding	21	44107373	44131181	1	PWP2	PWP2 small subunit processome component [Source:HGNC Symbol;Acc:HGNC:9711]
ENSG00000241956.11	10.2468	5.25366	1.55619	2.12852e-05	0.00172235	TRUE	102546299	ENSG00000241956	lncRNA	5	164296696	165171643	1		novel transcript
ENSG00000242262.1	9.03181	2.87126	0.883303	5.60824e-05	0.00363928	TRUE	NA	ENSG00000242262	processed_pseudogene	4	47706372	47706987	1		ribosomal protein L15 (RPL15) pseudogene
ENSG00000242779.7	58.1839	1.4164	0.709704	0.00133759	0.0337213	TRUE	79986	ENSG00000242779	transcribed_processed_pseudogene	19	52966896	53037898	-1	ZNF702P	zinc finger protein 702, pseudogene [Source:HGNC Symbol;Acc:HGNC:25775]
ENSG00000245522.2	41.0828	1.06619	0.449993	0.000728286	0.0218644	TRUE	440028	ENSG00000245522	lncRNA	11	9754770	9759533	-1	LINC02709	long intergenic non-protein coding RNA 2709 [Source:HGNC Symbol;Acc:HGNC:54226]
ENSG00000245812.4	36.1877	1.406	0.838445	0.00242794	0.0496863	TRUE	101927740	ENSG00000245812	lncRNA	5	159100483	159117478	1	LINC02202	long intergenic non-protein coding RNA 2202 [Source:HGNC Symbol;Acc:HGNC:53068]
ENSG00000246273.8	103.52	1.12056	0.418726	0.000312802	0.0127069	TRUE	283104	ENSG00000246273	lncRNA	11	9758268	9811335	1	SBF2-AS1	SBF2 antisense RNA 1 [Source:HGNC Symbol;Acc:HGNC:27438]
ENSG00000247134.8	121.235	1.05023	0.472833	0.00103033	0.0281575	TRUE	NA	ENSG00000247134	lncRNA	8	32927913	33045445	1		novel transcript
ENSG00000248641.1	23.3873	2.58221	0.849912	9.50976e-05	0.00530983	TRUE	NA	ENSG00000248641	processed_pseudogene	4	73098822	73099145	1	HMGA1P2	high mobility group AT-hook 1 pseudogene 2 [Source:HGNC Symbol;Acc:HGNC:13322]
ENSG00000250241.7	7.15564	5.80911	1.37787	1.15293e-07	3.1425e-05	TRUE	NA	ENSG00000250241	lncRNA	4	133075311	133149147	-1	PCDH10-DT	PCDH10 divergent transcript [Source:HGNC Symbol;Acc:HGNC:53036]
ENSG00000250510.8	31.8483	1.52644	0.503376	9.83177e-05	0.00543107	TRUE	27239	ENSG00000250510	protein_coding	12	6821624	6829972	1	GPR162	G protein-coupled receptor 162 [Source:HGNC Symbol;Acc:HGNC:16693]
ENSG00000250903.10	47.9334	1.27365	0.531859	0.000605121	0.0193137	TRUE	NA	ENSG00000250903	lncRNA	6	2245718	2525976	1	GMDS-DT	GMDS divergent transcript [Source:HGNC Symbol;Acc:HGNC:48993]
ENSG00000253357.1	16.7895	-1.77082	0.67813	0.000277286	0.0116511	TRUE	NA	ENSG00000253357	lncRNA	5	167721363	167729124	1		novel transcript
ENSG00000253485.3	90.1097	-1.00088	0.390886	0.000402959	0.0149746	TRUE	56110	ENSG00000253485	protein_coding	5	141364162	141512975	1	PCDHGA5	protocadherin gamma subfamily A, 5 [Source:HGNC Symbol;Acc:HGNC:8703]
ENSG00000254002.3	17.6466	-1.59826	0.463673	2.42568e-05	0.0018737	TRUE	NA	ENSG00000254002	lncRNA	8	23714066	23743042	-1		novel transcript
ENSG00000254187.1	19.9475	-2.34375	0.764324	6.51616e-05	0.00405352	TRUE	NA	ENSG00000254187	lncRNA	5	167653228	167660481	-1		novel transcript
ENSG00000255073.8	72.0138	-2.28059	0.745392	6.01019e-05	0.00381905	TRUE	NA	ENSG00000255073	protein_coding	11	58579172	58624639	1	ZFP91-CNTF	ZFP91-CNTF readthrough (NMD candidate) [Source:HGNC Symbol;Acc:HGNC:33441]
ENSG00000255200.1	23.4282	-1.45196	0.379755	4.99039e-06	0.000580763	TRUE	NA	ENSG00000255200	transcribed_processed_pseudogene	11	65174117	65176470	-1	PGAM1P8	phosphoglycerate mutase 1 pseudogene 8 [Source:HGNC Symbol;Acc:HGNC:42455]
ENSG00000255495.1	58.0486	1.31495	0.428749	9.68824e-05	0.00536609	TRUE	NA	ENSG00000255495	lncRNA	8	12194467	12196280	1		novel transcript
ENSG00000255663.1	12.5973	2.70483	0.920206	0.000149263	0.00736185	TRUE	NA	ENSG00000255663	protein_coding	11	114400682	114443932	1		novel transcript, RBM7-REXO2 readthrough
ENSG00000256664.1	63.5939	1.27207	0.293978	8.08711e-07	0.000145673	TRUE	NA	ENSG00000256664	processed_pseudogene	12	68841946	68842384	1		ribosomal L24 domain containing 1 (RSL24D1) pseudogene
ENSG00000257150.4	4.83619	2.10843	1.08638	0.00194705	0.0434156	TRUE	100132594	ENSG00000257150	transcribed_processed_pseudogene	12	95551582	95673999	1	PGAM1P5	phosphoglycerate mutase 1 pseudogene 5 [Source:HGNC Symbol;Acc:HGNC:42452]
ENSG00000257167.3	76.3769	-1.0966	0.50924	0.000977432	0.0271051	TRUE	100128191	ENSG00000257167	lncRNA	12	98512973	98516422	-1	TMPO-AS1	TMPO antisense RNA 1 [Source:HGNC Symbol;Acc:HGNC:44158]
ENSG00000257181.1	79.7974	1.35702	0.328219	1.8638e-06	0.000275775	TRUE	NA	ENSG00000257181	lncRNA	12	68841288	68843237	-1		novel transcript
ENSG00000257335.8	31.0657	2.30885	1.14968	0.00119531	0.0313031	TRUE	8972	ENSG00000257335	protein_coding	7	141907813	142106747	1	MGAM	maltase-glucoamylase [Source:HGNC Symbol;Acc:HGNC:7043]
ENSG00000257376.1	7.32139	1.44703	0.621943	0.000787286	0.0231645	TRUE	NA	ENSG00000257376	processed_pseudogene	12	42431665	42433357	-1		fragile X mental retardation, autosomal homolog 1 (FXR1) pseudogene
ENSG00000258964.1	57.3175	1.7751	0.771324	0.00070179	0.0212849	TRUE	NA	ENSG00000258964	lncRNA	14	61734138	61776260	1		novel transcript
ENSG00000260228.6	822.266	1.27303	0.459015	0.000232642	0.0101886	TRUE	102724163	ENSG00000260228	lncRNA	16	83789967	83807834	-1		novel transcript, antisense to CDH13
ENSG00000260230.5	21.3605	3.81927	1.20825	2.64356e-05	0.00200591	TRUE	23732	ENSG00000260230	protein_coding	9	109130293	109167249	-1	FRRS1L	ferric chelate reductase 1 like [Source:HGNC Symbol;Acc:HGNC:1362]
ENSG00000260439.1	51.6352	1.31207	0.59768	0.000933476	0.026273	TRUE	101929387	ENSG00000260439	lncRNA	16	921033	934495	1	LMF1-AS1	LMF1 antisense RNA 1 [Source:HGNC Symbol;Acc:HGNC:50469]
ENSG00000261115.7	17.2606	3.55499	1.01361	2.29318e-05	0.00181636	TRUE	100507421	ENSG00000261115	protein_coding	7	141074064	141480380	1	TMEM178B	transmembrane protein 178B [Source:HGNC Symbol;Acc:HGNC:44112]
ENSG00000262655.4	88.9955	-1.9521	0.491808	2.63928e-06	0.000357337	TRUE	10418	ENSG00000262655	protein_coding	11	13962723	14268133	1	SPON1	spondin 1 [Source:HGNC Symbol;Acc:HGNC:11252]
ENSG00000263513.6	64.3902	-2.45286	0.421536	2.57616e-10	1.97649e-07	TRUE	554282	ENSG00000263513	protein_coding	1	143955287	143971986	-1	FAM72C	family with sequence similarity 72 member C [Source:HGNC Symbol;Acc:HGNC:30602]
ENSG00000264230.9	51.506	-1.83195	0.787657	0.000485797	0.0167442	TRUE	728113	ENSG00000264230	protein_coding	10	46375627	46391784	1	ANXA8L1	annexin A8 like 1 [Source:HGNC Symbol;Acc:HGNC:23334]
ENSG00000266865.7	53.0771	1.61678	0.343526	1.18001e-07	3.17455e-05	TRUE	107984974	ENSG00000266865	transcribed_unprocessed_pseudogene	17	31008497	31093127	1		SMAD specific E3 ubiquitin protein ligase 2 (SMURF2) pseudogene
ENSG00000266918.1	12.2069	-1.54674	0.48092	5.7335e-05	0.00368427	TRUE	NA	ENSG00000266918	TEC	17	45531577	45533838	1		TEC
ENSG00000266993.3	15.8658	1.56854	0.726652	0.000764255	0.0227832	TRUE	NA	ENSG00000266993	lncRNA	1	51793934	51799154	1		novel transcript, antisense to NRD1
ENSG00000268941.2	7.13449	-3.29288	0.884494	1.37803e-05	0.00121991	TRUE	79160	ENSG00000268941	lncRNA	20	58634772	58635738	1	LINC01711	long intergenic non-protein coding RNA 1711 [Source:HGNC Symbol;Acc:HGNC:28663]
ENSG00000270820.7	73.8508	1.09187	0.40398	0.000296029	0.01224	TRUE	NA	ENSG00000270820	lncRNA	2	61471188	61484130	1	USP34-DT	USP34 divergent transcript [Source:HGNC Symbol;Acc:HGNC:55262]
ENSG00000270823.1	9.0485	3.43729	1.35545	0.000428302	0.0154779	TRUE	NA	ENSG00000270823	lncRNA	7	130495794	130498427	-1		novel transcript, antisense to MEST
ENSG00000272755.1	2.96993	5.67926	2.65757	0.000120514	0.00628828	TRUE	NA	ENSG00000272755	lncRNA	1	149264252	149264816	1		novel transcript
ENSG00000272789.1	7.13803	1.75554	0.717545	0.000586086	0.0189108	TRUE	NA	ENSG00000272789	lncRNA	2	127625997	127626848	-1		novel transcript, antisense to MYO7B
ENSG00000274376.4	6.81683	2.92857	1.22988	0.000508017	0.017091	TRUE	NA	ENSG00000274376	transcribed_unprocessed_pseudogene	15	82298553	82334609	1	ADAMTS7P1	ADAMTS7 pseudogene 1 [Source:HGNC Symbol;Acc:HGNC:49407]
ENSG00000274845.1	14.848	-1.00668	0.415861	0.000619304	0.0196461	TRUE	NA	ENSG00000274845	misc_RNA	2	191682452	191682633	1
ENSG00000275226.1	8.17728	3.08467	1.20388	0.00040163	0.0149746	TRUE	400121	ENSG00000275226	lncRNA	13	37534940	37551536	1	LINC00547	long intergenic non-protein coding RNA 547 [Source:HGNC Symbol;Acc:HGNC:43682]
ENSG00000275638.1	2.20175	5.00581	2.649	0.000545277	0.0179292	TRUE	NA	ENSG00000275638	lncRNA	15	65655620	65656085	-1		novel transcript, antisense to SLC24A1
ENSG00000275719.1	78.6978	-1.80397	0.755054	0.000403346	0.0149746	TRUE	NA	ENSG00000275719	lncRNA	19	46787815	46789043	1		novel transcript, antisense to SLC1A5
ENSG00000277778.3	21.0065	1.2182	0.609789	0.0015413	0.0369538	TRUE	595135	ENSG00000277778	transcribed_unprocessed_pseudogene	9	41006999	41074957	-1	PGM5P2	phosphoglucomutase 5 pseudogene 2 [Source:HGNC Symbol;Acc:HGNC:18965]
ENSG00000277991.4	161.802	-2.1069	0.655467	3.68597e-05	0.0026053	TRUE	NA	ENSG00000277991	lncRNA	21	7669397	7681742	-1		novel transcript
ENSG00000278989.1	8.26562	1.66965	0.793521	0.00116011	0.0307705	TRUE	NA	ENSG00000278989	TEC	11	86434924	86437282	-1		novel transcript
ENSG00000279204.1	52.7273	1.58527	0.860293	0.00175318	0.0401738	TRUE	NA	ENSG00000279204	TEC	5	159106380	159108617	1		TEC
ENSG00000279333.1	34.5222	3.57034	0.761006	1.27729e-07	3.39219e-05	TRUE	NA	ENSG00000279333	TEC	1	210678315	210681932	1		novel transcript
ENSG00000279739.1	4.4874	-2.34195	0.977468	0.000706879	0.0214079	TRUE	NA	ENSG00000279739	TEC	5	168128856	168130422	1		TEC
ENSG00000280061.1	23.9024	-4.63924	0.652725	2.52569e-13	5.23196e-10	TRUE	NA	ENSG00000280061	TEC	19	30553956	30558058	1		TEC
ENSG00000282849.1	44.5807	-2.05145	0.543956	5.43247e-06	0.000611595	TRUE	NA	ENSG00000282849	lncRNA	1	200478020	200483604	-1		novel transcript
ENSG00000283341.3	41.122	-1.88753	0.271349	1.47349e-13	3.39148e-10	TRUE	NA	ENSG00000283341	lncRNA	11	43578889	43840030	1		novel transcript
ENSG00000283900.1	7.85179	3.04788	1.44731	0.00126686	0.0327913	TRUE	102800317	ENSG00000283900	protein_coding	22	38291918	38398522	-1	TPTEP2-CSNK1E	TPTEP2-CSNK1E readthrough [Source:HGNC Symbol;Acc:HGNC:53829]
ENSG00000284237.1	8.90366	-1.69091	0.761731	0.000776666	0.0230166	TRUE	NA	ENSG00000284237	lncRNA	1	207959292	207969329	1	LINC02767	long intergenic non-protein coding RNA 2767 [Source:HGNC Symbol;Acc:HGNC:54287]
ENSG00000287281.1	22.8519	-1.43368	0.470101	8.69828e-05	0.0050472	TRUE	107985177	ENSG00000287281	lncRNA	18	75455787	75468835	1		novel transcript
ENSG00000287787.1	27.9281	-1.33173	0.42794	7.21092e-05	0.00435493	TRUE	NA	ENSG00000287787	lncRNA	16	85227203	85309176	1		novel transcript, sense intronic to GSE1
ENSG00000288529.1	3.68918	-4.45852	1.40332	8.31951e-06	0.000844798	TRUE	NA	ENSG00000288529	protein_coding	6	133953304	133980088	1		novel protein
ENSG00000288550.2	126.9	1.01924	0.473022	0.00118184	0.0311079	TRUE	NA	ENSG00000288550	protein_coding	3	9917116	9945385	1		novel protein
ENSG00000289106.1	36.6622	1.03754	0.251644	2.19656e-06	0.000307445	TRUE	NA	ENSG00000289106	lncRNA	1	161364227	161364751	1		novel transcript, antisense to CFAP126
ENSG00000289123.1	14.2247	-1.33115	0.786552	0.00204431	0.0449553	TRUE	NA	ENSG00000289123	lncRNA	9	91193809	91195055	1		novel transcript
ENSG00000289396.1	8.23529	1.44282	0.611502	0.000674549	0.0206705	TRUE	NA	ENSG00000289396	lncRNA	3	197073879	197075341	-1		novel transcript, sense intronic to DLG1

## Sheet: SupplementaryTable06
ensgene	baseMean	log2FoldChange	lfcSE	pvalue	padj	test	entrezgene_id	ensembl_gene_id	gene_biotype	chromosome_name	start_position	end_position	strand	external_gene_name	description
ENSG00000000971.16	231.699	2.21914	0.529735	1.52472e-06	3.55304e-05	TRUE	3075	ENSG00000000971	protein_coding	1	196652043	196747504	1	CFH	complement factor H [Source:HGNC Symbol;Acc:HGNC:4883]
ENSG00000001561.7	121.762	4.26819	0.479141	2.05512e-20	3.17352e-17	TRUE	22875	ENSG00000001561	protein_coding	6	46129989	46146688	1	ENPP4	ectonucleotide pyrophosphatase/phosphodiesterase 4 [Source:HGNC Symbol;Acc:HGNC:3359]
ENSG00000001617.12	153.949	1.35476	0.481297	0.000429537	0.00329954	TRUE	6405	ENSG00000001617	protein_coding	3	50155045	50189075	1	SEMA3F	semaphorin 3F [Source:HGNC Symbol;Acc:HGNC:10728]
ENSG00000002745.13	93.3118	4.61541	0.785421	1.60699e-10	1.71533e-08	TRUE	51384	ENSG00000002745	protein_coding	7	121325367	121341104	1	WNT16	Wnt family member 16 [Source:HGNC Symbol;Acc:HGNC:16267]
ENSG00000003096.14	32.8763	-4.76682	1.08712	4.87177e-07	1.41072e-05	TRUE	90293	ENSG00000003096	protein_coding	X	117897813	118117340	-1	KLHL13	kelch like family member 13 [Source:HGNC Symbol;Acc:HGNC:22931]
ENSG00000003249.15	52.2833	-2.17594	0.370629	2.86053e-10	2.68253e-08	TRUE	79007	ENSG00000003249	protein_coding	16	90004871	90019890	-1	DBNDD1	dysbindin domain containing 1 [Source:HGNC Symbol;Acc:HGNC:28455]
ENSG00000003400.15	100.628	1.11388	0.310079	4.52536e-05	0.000547654	TRUE	843	ENSG00000003400	protein_coding	2	201182898	201229406	1	CASP10	caspase 10 [Source:HGNC Symbol;Acc:HGNC:1500]
ENSG00000003436.16	580.68	1.51156	0.506754	0.000218824	0.00193681	TRUE	7035	ENSG00000003436	protein_coding	2	187464230	187565760	-1	TFPI	tissue factor pathway inhibitor [Source:HGNC Symbol;Acc:HGNC:11760]
ENSG00000003987.14	35.2214	1.59977	0.332869	1.39939e-07	4.9133e-06	TRUE	9108	ENSG00000003987	protein_coding	8	17296794	17413528	-1	MTMR7	myotubularin related protein 7 [Source:HGNC Symbol;Acc:HGNC:7454]
ENSG00000004777.19	75.4465	-1.97625	0.355464	2.57302e-09	1.68835e-07	TRUE	115703	ENSG00000004777	protein_coding	19	35774532	35788822	1	ARHGAP33	Rho GTPase activating protein 33 [Source:HGNC Symbol;Acc:HGNC:23085]
ENSG00000004799.8	51.5485	2.64275	0.515918	1.61653e-08	8.24752e-07	TRUE	5166	ENSG00000004799	protein_coding	7	95583499	95596516	-1	PDK4	pyruvate dehydrogenase kinase 4 [Source:HGNC Symbol;Acc:HGNC:8812]
ENSG00000005075.16	385.921	-1.19946	0.226839	1.87844e-08	9.41784e-07	TRUE	5439	ENSG00000005075	protein_coding	7	102473128	102478922	-1	POLR2J	RNA polymerase II subunit J [Source:HGNC Symbol;Acc:HGNC:9197]
ENSG00000005436.14	202.811	1.10808	0.274346	7.66352e-06	0.000130736	TRUE	6936	ENSG00000005436	protein_coding	2	75652000	75710985	-1	GCFC2	GC-rich sequence DNA-binding factor 2 [Source:HGNC Symbol;Acc:HGNC:1317]
ENSG00000006015.18	151.384	-1.5297	0.447105	5.76543e-05	0.000666058	TRUE	55049	ENSG00000006015	protein_coding	19	18588685	18592337	1	REX1BD	required for excision 1-B domain containing [Source:HGNC Symbol;Acc:HGNC:26098]
ENSG00000006118.15	144.427	-1.55288	0.310912	6.88405e-08	2.74923e-06	TRUE	54972	ENSG00000006118	protein_coding	11	60924460	60937159	1	TMEM132A	transmembrane protein 132A [Source:HGNC Symbol;Acc:HGNC:31092]
ENSG00000006327.14	3804	-1.12149	0.356206	0.000230176	0.00201647	TRUE	51330	ENSG00000006327	protein_coding	16	3018445	3022383	1	TNFRSF12A	TNF receptor superfamily member 12A [Source:HGNC Symbol;Acc:HGNC:18152]
ENSG00000006606.9	29.9743	-1.34294	0.62194	0.0023644	0.0126716	TRUE	10344	ENSG00000006606	protein_coding	7	75769533	75789896	-1	CCL26	C-C motif chemokine ligand 26 [Source:HGNC Symbol;Acc:HGNC:10625]
ENSG00000006704.11	299.873	-1.02312	0.258924	1.36555e-05	0.000210662	TRUE	9569	ENSG00000006704	protein_coding	7	74453790	74602605	1	GTF2IRD1	GTF2I repeat domain containing 1 [Source:HGNC Symbol;Acc:HGNC:4661]
ENSG00000007080.11	361.908	-1.44438	0.398357	2.91507e-05	0.000386501	TRUE	115098	ENSG00000007080	protein_coding	19	17933015	17943991	1	CCDC124	coiled-coil domain containing 124 [Source:HGNC Symbol;Acc:HGNC:25171]
ENSG00000007376.8	144.829	-1.59776	0.339589	2.65488e-07	8.54098e-06	TRUE	113000	ENSG00000007376	protein_coding	16	784974	788397	-1	RPUSD1	RNA pseudouridine synthase domain containing 1 [Source:HGNC Symbol;Acc:HGNC:14173]
ENSG00000007520.4	394.089	-1.26248	0.351692	4.0857e-05	0.00050232	TRUE	115939	ENSG00000007520	protein_coding	16	1349240	1351878	-1	TSR3	TSR3 ribosome maturation factor [Source:HGNC Symbol;Acc:HGNC:14175]
ENSG00000007944.15	68.3543	1.73994	0.484986	2.28877e-05	0.000316506	TRUE	29116	ENSG00000007944	protein_coding	6	16129086	16148248	1	MYLIP	myosin regulatory light chain interacting protein [Source:HGNC Symbol;Acc:HGNC:21155]
ENSG00000007952.18	3.27102	4.36211	1.51069	3.31063e-05	0.00042555	TRUE	27035	ENSG00000007952	protein_coding	X	100843324	100874359	-1	NOX1	NADPH oxidase 1 [Source:HGNC Symbol;Acc:HGNC:7889]
ENSG00000008517.19	58.2331	1.2236	1.49424	0.011198	0.0424864	TRUE	9235	ENSG00000008517	protein_coding	16	3065297	3082192	1	IL32	interleukin 32 [Source:HGNC Symbol;Acc:HGNC:16830]
ENSG00000009413.16	2729.22	1.87927	0.41314	4.02152e-07	1.21132e-05	TRUE	5980	ENSG00000009413	protein_coding	6	111299028	111483715	-1	REV3L	REV3 like, DNA directed polymerase zeta catalytic subunit [Source:HGNC Symbol;Acc:HGNC:9968]
ENSG00000009724.17	23.0338	1.24594	0.414141	0.000287188	0.00240009	TRUE	10747	ENSG00000009724	protein_coding	1	11026523	11047239	-1	MASP2	MBL associated serine protease 2 [Source:HGNC Symbol;Acc:HGNC:6902]
ENSG00000009790.15	2.35192	-3.19392	1.30968	0.000503933	0.00373523	TRUE	80342	ENSG00000009790	protein_coding	1	209756032	209782320	1	TRAF3IP3	TRAF3 interacting protein 3 [Source:HGNC Symbol;Acc:HGNC:30766]
ENSG00000010810.17	1286.48	1.10318	0.254364	2.24766e-06	4.82061e-05	TRUE	2534	ENSG00000010810	protein_coding	6	111660332	111873452	-1	FYN	FYN proto-oncogene, Src family tyrosine kinase [Source:HGNC Symbol;Acc:HGNC:4037]
ENSG00000011332.22	34.353	-1.34908	0.404844	9.59328e-05	0.000997796	TRUE	8193	ENSG00000011332	protein_coding	19	38211006	38229714	-1	DPF1	double PHD fingers 1 [Source:HGNC Symbol;Acc:HGNC:20225]
ENSG00000011422.12	1071.42	-1.25473	0.270927	4.89179e-07	1.41459e-05	TRUE	5329	ENSG00000011422	protein_coding	19	43646095	43670547	-1	PLAUR	plasminogen activator, urokinase receptor [Source:HGNC Symbol;Acc:HGNC:9053]
ENSG00000011426.11	3040.73	-1.85864	0.513461	1.98632e-05	0.000282092	TRUE	54443	ENSG00000011426	protein_coding	7	36389821	36453791	1	ANLN	anillin actin binding protein [Source:HGNC Symbol;Acc:HGNC:14082]
ENSG00000011454.18	1588.37	1.21876	0.276577	1.36067e-06	3.24919e-05	TRUE	23637	ENSG00000011454	protein_coding	9	122940833	123104866	1	RABGAP1	RAB GTPase activating protein 1 [Source:HGNC Symbol;Acc:HGNC:17155]
ENSG00000011465.18	31451	1.41492	0.64942	0.00197977	0.0109943	TRUE	1634	ENSG00000011465	protein_coding	12	91140484	91183217	-1	DCN	decorin [Source:HGNC Symbol;Acc:HGNC:2705]
ENSG00000012048.23	402.649	-1.33029	0.449765	0.000318913	0.00260471	TRUE	672	ENSG00000012048	protein_coding	17	43044295	43170245	-1	BRCA1	BRCA1 DNA repair associated [Source:HGNC Symbol;Acc:HGNC:1100]
ENSG00000013297.12	2937.43	2.3307	0.808761	0.000165269	0.00154297	TRUE	5010	ENSG00000013297	protein_coding	3	170418868	170454733	1	CLDN11	claudin 11 [Source:HGNC Symbol;Acc:HGNC:8514]
ENSG00000013306.16	1102.36	-1.04216	0.286429	4.67117e-05	0.000561778	TRUE	51629	ENSG00000013306	protein_coding	17	44319625	44324870	-1	SLC25A39	solute carrier family 25 member 39 [Source:HGNC Symbol;Acc:HGNC:24279]
ENSG00000013573.17	226.66	-1.37183	0.304653	7.96223e-07	2.12721e-05	TRUE	1663	ENSG00000013573	protein_coding	12	31073860	31104799	1	DDX11	DEAD/H-box helicase 11 [Source:HGNC Symbol;Acc:HGNC:2736]
ENSG00000013810.21	878.055	-2.27351	0.462832	6.30327e-08	2.54804e-06	TRUE	10460	ENSG00000013810	protein_coding	4	1712858	1745171	1	TACC3	transforming acidic coiled-coil containing protein 3 [Source:HGNC Symbol;Acc:HGNC:11524]
ENSG00000014138.9	245.236	-1.61568	0.394038	3.74186e-06	7.35761e-05	TRUE	23649	ENSG00000014138	protein_coding	11	65261920	65305589	1	POLA2	DNA polymerase alpha 2, accessory subunit [Source:HGNC Symbol;Acc:HGNC:30073]
ENSG00000015133.20	4.18897	-1.91378	1.96349	0.00192162	0.0107565	TRUE	440193	ENSG00000015133	protein_coding	14	91271323	91417844	-1	CCDC88C	coiled-coil domain containing 88C [Source:HGNC Symbol;Acc:HGNC:19967]
ENSG00000016391.11	64.2181	2.88429	0.898108	4.24126e-05	0.000518491	TRUE	55349	ENSG00000016391	protein_coding	3	53812335	53846419	-1	CHDH	choline dehydrogenase [Source:HGNC Symbol;Acc:HGNC:24288]
ENSG00000017427.17	44.5745	-2.11386	1.11527	0.00212333	0.0116216	TRUE	3479	ENSG00000017427	protein_coding	12	102395874	102481744	-1	IGF1	insulin like growth factor 1 [Source:HGNC Symbol;Acc:HGNC:5464]
ENSG00000019991.18	22.4027	2.40445	0.940285	0.000382649	0.00301419	TRUE	3082	ENSG00000019991	protein_coding	7	81699010	81770438	-1	HGF	hepatocyte growth factor [Source:HGNC Symbol;Acc:HGNC:4893]
ENSG00000023287.13	1235.58	1.07338	0.221768	2.09703e-07	6.96753e-06	TRUE	9821	ENSG00000023287	protein_coding	8	52622458	52745843	-1	RB1CC1	RB1 inducible coiled-coil 1 [Source:HGNC Symbol;Acc:HGNC:15574]
ENSG00000023445.16	19.4361	1.97813	0.501803	5.76437e-06	0.000104752	TRUE	330	ENSG00000023445	protein_coding	11	102317450	102339403	1	BIRC3	baculoviral IAP repeat containing 3 [Source:HGNC Symbol;Acc:HGNC:591]
ENSG00000023892.11	8.60445	-1.81315	0.69973	0.000515318	0.00380017	TRUE	50619	ENSG00000023892	protein_coding	6	35297818	35321771	1	DEF6	DEF6 guanine nucleotide exchange factor [Source:HGNC Symbol;Acc:HGNC:2760]
ENSG00000025039.15	7.14378	2.10237	1.34199	0.003043	0.0154167	TRUE	58528	ENSG00000025039	protein_coding	6	89364616	89412273	-1	RRAGD	Ras related GTP binding D [Source:HGNC Symbol;Acc:HGNC:19903]
ENSG00000025770.19	558.446	-1.39348	0.304315	5.46178e-07	1.54096e-05	TRUE	29781	ENSG00000025770	protein_coding	22	50508224	50524780	1	NCAPH2	non-SMC condensin II complex subunit H2 [Source:HGNC Symbol;Acc:HGNC:25071]
ENSG00000025796.14	2745.39	1.25345	0.198754	3.69351e-11	4.6496e-09	TRUE	11231	ENSG00000025796	protein_coding	6	107867756	107958208	-1	SEC63	SEC63 homolog, protein translocation regulator [Source:HGNC Symbol;Acc:HGNC:21082]
ENSG00000026036.22	135.14	-1.40355	0.540848	0.000841422	0.00555583	TRUE	NA	ENSG00000026036	protein_coding	20	63659300	63698684	1	RTEL1-TNFRSF6B	RTEL1-TNFRSF6B readthrough (NMD candidate) [Source:HGNC Symbol;Acc:HGNC:44095]
ENSG00000026559.14	55.2638	-1.98955	0.476503	2.38299e-06	5.05933e-05	TRUE	3755	ENSG00000026559	protein_coding	20	51003656	51023107	-1	KCNG1	potassium voltage-gated channel modifier subfamily G member 1 [Source:HGNC Symbol;Acc:HGNC:6248]
ENSG00000027869.12	18.049	-3.52278	1.39296	0.000393041	0.00307984	TRUE	9047	ENSG00000027869	protein_coding	1	156806243	156816848	-1	SH2D2A	SH2 domain containing 2A [Source:HGNC Symbol;Acc:HGNC:10821]
ENSG00000028277.22	99.0941	1.38025	0.461203	0.000238355	0.00207168	TRUE	5452	ENSG00000028277	protein_coding	19	42086110	42196585	-1	POU2F2	POU class 2 homeobox 2 [Source:HGNC Symbol;Acc:HGNC:9213]
ENSG00000029993.15	620.956	-1.93061	0.417621	2.94756e-07	9.34451e-06	TRUE	3149	ENSG00000029993	protein_coding	X	150980509	150990771	1	HMGB3	high mobility group box 3 [Source:HGNC Symbol;Acc:HGNC:5004]
ENSG00000034053.15	30.9185	-1.90075	1.08972	0.00322463	0.0161044	TRUE	321	ENSG00000034053	protein_coding	15	28884483	29118315	1	APBA2	amyloid beta precursor protein binding family A member 2 [Source:HGNC Symbol;Acc:HGNC:579]
ENSG00000034971.17	2.52414	2.6538	1.44688	0.00158896	0.00925912	TRUE	4653	ENSG00000034971	protein_coding	1	171635417	171652688	-1	MYOC	myocilin [Source:HGNC Symbol;Acc:HGNC:7610]
ENSG00000035499.13	88.2157	-1.6432	0.607802	0.000498684	0.00371177	TRUE	55789	ENSG00000035499	protein_coding	5	60596912	60700190	-1	DEPDC1B	DEP domain containing 1B [Source:HGNC Symbol;Acc:HGNC:24902]
ENSG00000038945.15	18.3321	3.58841	0.974287	9.10462e-06	0.000150636	TRUE	4481	ENSG00000038945	protein_coding	8	16107878	16567490	-1	MSR1	macrophage scavenger receptor 1 [Source:HGNC Symbol;Acc:HGNC:7376]
ENSG00000039068.20	5.71018	1.47481	0.928941	0.0055374	0.0246849	TRUE	999	ENSG00000039068	protein_coding	16	68737292	68835537	1	CDH1	cadherin 1 [Source:HGNC Symbol;Acc:HGNC:1748]
ENSG00000040608.14	1.95502	-2.57559	1.40782	0.00243942	0.0129805	TRUE	65078	ENSG00000040608	protein_coding	22	20241415	20283246	-1	RTN4R	reticulon 4 receptor [Source:HGNC Symbol;Acc:HGNC:18601]
ENSG00000046653.15	17.2319	2.02111	0.510499	4.73038e-06	8.88644e-05	TRUE	2824	ENSG00000046653	protein_coding	X	13770939	13938638	-1	GPM6B	glycoprotein M6B [Source:HGNC Symbol;Acc:HGNC:4461]
ENSG00000046774.10	5.84696	-7.37801	3.08377	5.261e-05	0.000617327	TRUE	51438	ENSG00000046774	protein_coding	X	142202342	142205290	-1	MAGEC2	MAGE family member C2 [Source:HGNC Symbol;Acc:HGNC:13574]
ENSG00000046889.19	6.98809	1.78945	1.5862	0.00579603	0.0255575	TRUE	80243	ENSG00000046889	protein_coding	8	67952046	68237032	1	PREX2	phosphatidylinositol-3,4,5-trisphosphate dependent Rac exchange factor 2 [Source:HGNC Symbol;Acc:HGNC:22950]
ENSG00000047346.13	494.8	1.33972	0.253694	1.42193e-08	7.41807e-07	TRUE	56204	ENSG00000047346	protein_coding	15	52581317	52709817	-1	FAM214A	family with sequence similarity 214 member A [Source:HGNC Symbol;Acc:HGNC:25609]
ENSG00000048392.13	1085.5	1.35247	0.234896	9.75121e-10	7.51089e-08	TRUE	50484	ENSG00000048392	protein_coding	8	102204502	102238961	-1	RRM2B	ribonucleotide reductase regulatory TP53 inducible subunit M2B [Source:HGNC Symbol;Acc:HGNC:17296]
ENSG00000048740.19	659.586	2.48383	0.505082	4.83101e-08	2.03087e-06	TRUE	10659	ENSG00000048740	protein_coding	10	10798397	11336675	1	CELF2	CUGBP Elav-like family member 2 [Source:HGNC Symbol;Acc:HGNC:2550]
ENSG00000049449.10	7212.39	1.20576	0.191649	3.35689e-11	4.32519e-09	TRUE	5954	ENSG00000049449	protein_coding	11	32091074	32105722	1	RCN1	reticulocalbin 1 [Source:HGNC Symbol;Acc:HGNC:9934]
ENSG00000050767.18	4.03342	-2.16921	2.02107	0.00252362	0.0133033	TRUE	91522	ENSG00000050767	protein_coding	5	178237476	178590393	-1	COL23A1	collagen type XXIII alpha 1 chain [Source:HGNC Symbol;Acc:HGNC:22990]
ENSG00000050820.17	742.041	-1.03787	0.356467	0.000562979	0.00407763	TRUE	9564	ENSG00000050820	protein_coding	16	75228181	75268053	-1	BCAR1	BCAR1 scaffold protein, Cas family member [Source:HGNC Symbol;Acc:HGNC:971]
ENSG00000051180.17	229.435	-1.57709	0.386195	4.12444e-06	7.94796e-05	TRUE	5888	ENSG00000051180	protein_coding	15	40694774	40732340	1	RAD51	RAD51 recombinase [Source:HGNC Symbol;Acc:HGNC:9817]
ENSG00000051341.15	246.54	-1.26741	0.636748	0.00394795	0.0189448	TRUE	10721	ENSG00000051341	protein_coding	3	121431431	121545988	-1	POLQ	DNA polymerase theta [Source:HGNC Symbol;Acc:HGNC:9186]
ENSG00000051523.11	374.654	-1.07551	0.428706	0.00164725	0.00950555	TRUE	1535	ENSG00000051523	protein_coding	16	88643289	88651054	-1	CYBA	cytochrome b-245 alpha chain [Source:HGNC Symbol;Acc:HGNC:2577]
ENSG00000052802.13	605.958	1.09077	0.251315	2.18891e-06	4.72963e-05	TRUE	6307	ENSG00000052802	protein_coding	4	165327667	165343164	1	MSMO1	methylsterol monooxygenase 1 [Source:HGNC Symbol;Acc:HGNC:10545]
ENSG00000052850.8	11.5313	-5.35464	1.11196	3.11502e-08	1.42034e-06	TRUE	60529	ENSG00000052850	protein_coding	11	44260440	44310139	-1	ALX4	ALX homeobox 4 [Source:HGNC Symbol;Acc:HGNC:450]
ENSG00000054219.11	20.5018	1.40653	1.62855	0.00899722	0.0360127	TRUE	4065	ENSG00000054219	protein_coding	2	159803355	159904756	-1	LY75	lymphocyte antigen 75 [Source:HGNC Symbol;Acc:HGNC:6729]
ENSG00000054356.14	474.958	-2.1653	0.713247	0.000136609	0.00132452	TRUE	5798	ENSG00000054356	protein_coding	2	219289623	219309648	-1	PTPRN	protein tyrosine phosphatase receptor type N [Source:HGNC Symbol;Acc:HGNC:9676]
ENSG00000054598.9	176.683	1.28078	0.389898	0.000107367	0.0010946	TRUE	2296	ENSG00000054598	protein_coding	6	1609915	1613897	1	FOXC1	forkhead box C1 [Source:HGNC Symbol;Acc:HGNC:3800]
ENSG00000054654.20	243.075	-1.38034	0.403022	6.36714e-05	0.000720101	TRUE	23224	ENSG00000054654	protein_coding	14	63761899	64226433	1	SYNE2	spectrin repeat containing nuclear envelope protein 2 [Source:HGNC Symbol;Acc:HGNC:17084]
ENSG00000054967.13	131.029	-1.75708	0.401039	1.08642e-06	2.74127e-05	TRUE	84957	ENSG00000054967	protein_coding	11	73376399	73397474	1	RELT	RELT TNF receptor [Source:HGNC Symbol;Acc:HGNC:13764]
ENSG00000055732.13	11.3025	2.74646	1.31202	0.0010023	0.00642401	TRUE	55283	ENSG00000055732	protein_coding	1	85018082	85048500	-1	MCOLN3	mucolipin TRP cation channel 3 [Source:HGNC Symbol;Acc:HGNC:13358]
ENSG00000055813.6	236.28	-3.3772	1.07286	6.65097e-05	0.000745314	TRUE	114800	ENSG00000055813	protein_coding	2	56183990	56386172	1	CCDC85A	coiled-coil domain containing 85A [Source:HGNC Symbol;Acc:HGNC:29400]
ENSG00000056736.10	100.016	2.53373	0.54013	1.41796e-07	4.96137e-06	TRUE	55540	ENSG00000056736	protein_coding	3	53846568	53865794	1	IL17RB	interleukin 17 receptor B [Source:HGNC Symbol;Acc:HGNC:18015]
ENSG00000058453.17	179.058	-1.01861	0.278423	4.61964e-05	0.000556736	TRUE	9696	ENSG00000058453	protein_coding	1	16740273	16972964	1	CROCC	ciliary rootlet coiled-coil, rootletin [Source:HGNC Symbol;Acc:HGNC:21299]
ENSG00000059145.19	194.526	-1.17344	0.284831	5.46893e-06	0.000100219	TRUE	64718	ENSG00000059145	protein_coding	16	1363205	1414751	-1	UNKL	unk like zinc finger [Source:HGNC Symbol;Acc:HGNC:14184]
ENSG00000061337.15	174.438	-1.06574	0.423556	0.00165594	0.00955332	TRUE	11178	ENSG00000061337	protein_coding	8	20246165	20303963	-1	LZTS1	leucine zipper tumor suppressor 1 [Source:HGNC Symbol;Acc:HGNC:13861]
ENSG00000062822.16	175.721	-2.01827	0.4543	7.0821e-07	1.93447e-05	TRUE	5424	ENSG00000062822	protein_coding	19	50384204	50418018	1	POLD1	DNA polymerase delta 1, catalytic subunit [Source:HGNC Symbol;Acc:HGNC:9175]
ENSG00000063241.8	357.873	-1.1886	0.33319	4.88265e-05	0.000582278	TRUE	79763	ENSG00000063241	protein_coding	19	55452985	55462343	-1	ISOC2	isochorismatase domain containing 2 [Source:HGNC Symbol;Acc:HGNC:26278]
ENSG00000063245.15	1103.17	-1.22512	0.351651	6.23991e-05	0.000709549	TRUE	29924	ENSG00000063245	protein_coding	19	55675226	55709858	1	EPN1	epsin 1 [Source:HGNC Symbol;Acc:HGNC:21604]
ENSG00000063660.9	3487.57	-1.44441	0.48194	0.000246805	0.00213391	TRUE	2817	ENSG00000063660	protein_coding	2	240435663	240468076	1	GPC1	glypican 1 [Source:HGNC Symbol;Acc:HGNC:4449]
ENSG00000063854.13	373.014	-1.13973	0.329245	7.67325e-05	0.000832484	TRUE	3029	ENSG00000063854	protein_coding	16	1795620	1827157	-1	HAGH	hydroxyacylglutathione hydrolase [Source:HGNC Symbol;Acc:HGNC:4805]
ENSG00000064205.11	1218.9	4.85375	0.795746	3.77327e-11	4.69231e-09	TRUE	8839	ENSG00000064205	protein_coding	20	44714844	44728509	1	CCN5	cellular communication network factor 5 [Source:HGNC Symbol;Acc:HGNC:12770]
ENSG00000064309.16	607.238	2.20025	0.595815	1.16024e-05	0.000183695	TRUE	50937	ENSG00000064309	protein_coding	11	125955796	126063335	-1	CDON	cell adhesion associated, oncogene regulated [Source:HGNC Symbol;Acc:HGNC:17104]
ENSG00000064490.14	268.478	-1.04913	0.289635	4.88858e-05	0.000582481	TRUE	8625	ENSG00000064490	protein_coding	19	19192229	19201869	1	RFXANK	regulatory factor X associated ankyrin containing protein [Source:HGNC Symbol;Acc:HGNC:9987]
ENSG00000064787.14	46.9735	1.4197	0.885119	0.00485253	0.0222264	TRUE	8537	ENSG00000064787	protein_coding	20	53936777	54070594	-1	BCAS1	brain enriched myelin associated protein 1 [Source:HGNC Symbol;Acc:HGNC:974]
ENSG00000064989.13	10.8876	1.03604	0.700211	0.0118494	0.0444266	TRUE	10203	ENSG00000064989	protein_coding	2	187341964	187448460	-1	CALCRL	calcitonin receptor like receptor [Source:HGNC Symbol;Acc:HGNC:16709]
ENSG00000065054.14	598.458	-2.17719	0.467928	2.29779e-07	7.51337e-06	TRUE	9351	ENSG00000065054	protein_coding	16	2025356	2039026	1	SLC9A3R2	SLC9A3 regulator 2 [Source:HGNC Symbol;Acc:HGNC:11076]
ENSG00000065057.9	89.4642	-1.58295	0.378935	3.00522e-06	6.15473e-05	TRUE	4913	ENSG00000065057	protein_coding	16	2039815	2047866	-1	NTHL1	nth like DNA glycosylase 1 [Source:HGNC Symbol;Acc:HGNC:8028]
ENSG00000065328.17	205.798	-1.96202	0.500536	6.4885e-06	0.000115167	TRUE	55388	ENSG00000065328	protein_coding	10	13161558	13211110	1	MCM10	minichromosome maintenance 10 replication initiation factor [Source:HGNC Symbol;Acc:HGNC:18043]
ENSG00000065618.21	12.2439	-1.99379	0.71912	0.00030632	0.00252591	TRUE	1308	ENSG00000065618	protein_coding	10	104031286	104085880	-1	COL17A1	collagen type XVII alpha 1 chain [Source:HGNC Symbol;Acc:HGNC:2194]
ENSG00000066185.13	10.6416	1.16018	0.549048	0.00341295	0.0168129	TRUE	84217	ENSG00000066185	protein_coding	1	42430329	42456253	-1	ZMYND12	zinc finger MYND-type containing 12 [Source:HGNC Symbol;Acc:HGNC:21192]
ENSG00000066279.19	1299.98	-1.49414	0.615817	0.00112747	0.00706975	TRUE	259266	ENSG00000066279	protein_coding	1	197084121	197146694	-1	ASPM	assembly factor for spindle microtubules [Source:HGNC Symbol;Acc:HGNC:19048]
ENSG00000066382.17	19.442	-3.62814	1.07097	3.88193e-05	0.000482907	TRUE	744	ENSG00000066382	protein_coding	11	30384493	30586872	-1	MPPED2	metallophosphoesterase domain containing 2 [Source:HGNC Symbol;Acc:HGNC:1180]
ENSG00000067057.18	3371.61	-1.05304	0.258236	7.62886e-06	0.000130508	TRUE	5214	ENSG00000067057	protein_coding	10	3066333	3137718	1	PFKP	phosphofructokinase, platelet [Source:HGNC Symbol;Acc:HGNC:8878]
ENSG00000067167.8	6085.63	1.16946	0.219476	2.11647e-08	1.04528e-06	TRUE	23471	ENSG00000067167	protein_coding	8	70573218	70608416	-1	TRAM1	translocation associated membrane protein 1 [Source:HGNC Symbol;Acc:HGNC:20568]
ENSG00000067606.17	10.9513	-1.79547	1.03748	0.00347915	0.0170736	TRUE	5590	ENSG00000067606	protein_coding	1	2050411	2185395	1	PRKCZ	protein kinase C zeta [Source:HGNC Symbol;Acc:HGNC:9412]
ENSG00000068001.14	553.608	-1.31749	0.280882	3.44362e-07	1.06353e-05	TRUE	8692	ENSG00000068001	protein_coding	3	50317790	50322782	-1	HYAL2	hyaluronidase 2 [Source:HGNC Symbol;Acc:HGNC:5321]
ENSG00000068078.20	81.9935	-2.40923	0.756721	7.56672e-05	0.000824402	TRUE	2261	ENSG00000068078	protein_coding	4	1793293	1808872	1	FGFR3	fibroblast growth factor receptor 3 [Source:HGNC Symbol;Acc:HGNC:3690]
ENSG00000068489.13	994.431	-1.78532	0.541378	7.09948e-05	0.000779361	TRUE	55771	ENSG00000068489	protein_coding	17	59155732	59206709	1	PRR11	proline rich 11 [Source:HGNC Symbol;Acc:HGNC:25619]
ENSG00000068615.20	8.33792	-1.36574	0.653524	0.00264237	0.0138098	TRUE	65055	ENSG00000068615	protein_coding	2	86213993	86338083	-1	REEP1	receptor accessory protein 1 [Source:HGNC Symbol;Acc:HGNC:25786]
ENSG00000068697.7	6429.67	1.01058	0.136561	2.05235e-14	6.01753e-12	TRUE	9741	ENSG00000068697	protein_coding	2	20032650	20051628	-1	LAPTM4A	lysosomal protein transmembrane 4 alpha [Source:HGNC Symbol;Acc:HGNC:6924]
ENSG00000069011.16	13.8055	-6.88225	1.49761	6.32708e-10	5.38802e-08	TRUE	5307	ENSG00000069011	protein_coding	5	135027734	135034813	-1	PITX1	paired like homeodomain 1 [Source:HGNC Symbol;Acc:HGNC:9004]
ENSG00000069535.14	4.02214	1.93373	1.65135	0.00806892	0.0331031	TRUE	4129	ENSG00000069535	protein_coding	X	43766610	43882450	-1	MAOB	monoamine oxidase B [Source:HGNC Symbol;Acc:HGNC:6834]
ENSG00000069702.11	1511.21	2.35433	0.401054	2.56772e-10	2.48854e-08	TRUE	7049	ENSG00000069702	protein_coding	1	91680343	91906335	-1	TGFBR3	transforming growth factor beta receptor 3 [Source:HGNC Symbol;Acc:HGNC:11774]
ENSG00000070047.13	568.58	-1.17072	0.27583	3.15917e-06	6.4133e-05	TRUE	57661	ENSG00000070047	protein_coding	11	576470	612222	1	PHRF1	PHD and ring finger domains 1 [Source:HGNC Symbol;Acc:HGNC:24351]
ENSG00000070182.21	53.4988	-2.53686	0.962328	0.000358898	0.00286169	TRUE	6710	ENSG00000070182	protein_coding	14	64746283	64879907	-1	SPTB	spectrin beta, erythrocytic [Source:HGNC Symbol;Acc:HGNC:11274]
ENSG00000070193.5	3.64229	2.63664	2.09248	0.00418887	0.0198338	TRUE	2255	ENSG00000070193	protein_coding	5	44300247	44389706	-1	FGF10	fibroblast growth factor 10 [Source:HGNC Symbol;Acc:HGNC:3666]
ENSG00000070404.10	1841.87	-2.32889	0.503359	2.44751e-07	7.94e-06	TRUE	10272	ENSG00000070404	protein_coding	19	676392	683392	1	FSTL3	follistatin like 3 [Source:HGNC Symbol;Acc:HGNC:3973]
ENSG00000070423.18	198.361	-1.51454	0.394266	1.21339e-05	0.000191065	TRUE	55658	ENSG00000070423	protein_coding	19	647526	663233	-1	RNF126	ring finger protein 126 [Source:HGNC Symbol;Acc:HGNC:21151]
ENSG00000070669.17	994.311	1.21598	0.451919	0.00074898	0.00509205	TRUE	440	ENSG00000070669	protein_coding	7	97851677	97872542	-1	ASNS	asparagine synthetase (glutamine-hydrolyzing) [Source:HGNC Symbol;Acc:HGNC:753]
ENSG00000071242.12	1399.25	1.18508	0.407708	0.000440984	0.00336779	TRUE	6196	ENSG00000071242	protein_coding	6	166409364	166906451	-1	RPS6KA2	ribosomal protein S6 kinase A2 [Source:HGNC Symbol;Acc:HGNC:10431]
ENSG00000071282.12	1368.62	2.17828	0.655145	4.44147e-05	0.000538909	TRUE	29995	ENSG00000071282	protein_coding	3	8501807	8574668	1	LMCD1	LIM and cysteine rich domains 1 [Source:HGNC Symbol;Acc:HGNC:6633]
ENSG00000071539.14	441.48	-1.75171	0.441512	5.73482e-06	0.000104595	TRUE	9319	ENSG00000071539	protein_coding	5	892884	919357	1	TRIP13	thyroid hormone receptor interactor 13 [Source:HGNC Symbol;Acc:HGNC:12307]
ENSG00000071564.17	751.77	-1.08072	0.276486	1.56516e-05	0.00023357	TRUE	6929	ENSG00000071564	protein_coding	19	1609290	1652615	-1	TCF3	transcription factor 3 [Source:HGNC Symbol;Acc:HGNC:11633]
ENSG00000071655.18	794.595	-1.42322	0.405664	4.57064e-05	0.000551692	TRUE	53615	ENSG00000071655	protein_coding	19	1573596	1592865	-1	MBD3	methyl-CpG binding domain protein 3 [Source:HGNC Symbol;Acc:HGNC:6918]
ENSG00000071889.17	338.306	-1.32271	0.252239	2.04885e-08	1.0184e-06	TRUE	60343	ENSG00000071889	protein_coding	X	154506159	154516242	-1	FAM3A	FAM3 metabolism regulating signaling molecule A [Source:HGNC Symbol;Acc:HGNC:13749]
ENSG00000071894.17	846.567	-1.20606	0.31525	1.75156e-05	0.000254367	TRUE	29894	ENSG00000071894	protein_coding	8	144393229	144409335	-1	CPSF1	cleavage and polyadenylation specific factor 1 [Source:HGNC Symbol;Acc:HGNC:2324]
ENSG00000071967.12	9549.51	1.43555	0.194857	1.83293e-14	5.58634e-12	TRUE	79901	ENSG00000071967	protein_coding	2	171522247	171558129	1	CYBRD1	cytochrome b reductase 1 [Source:HGNC Symbol;Acc:HGNC:20797]
ENSG00000072201.14	209.667	1.83212	0.494787	1.39834e-05	0.000214502	TRUE	84708	ENSG00000072201	protein_coding	4	53459301	53701405	-1	LNX1	ligand of numb-protein X 1 [Source:HGNC Symbol;Acc:HGNC:6657]
ENSG00000072401.15	379.682	2.3801	0.283811	3.04369e-18	2.35003e-15	TRUE	7321	ENSG00000072401	protein_coding	10	58334979	58370751	1	UBE2D1	ubiquitin conjugating enzyme E2 D1 [Source:HGNC Symbol;Acc:HGNC:12474]
ENSG00000072571.20	348.482	-1.55896	0.551794	0.000372518	0.00294895	TRUE	3161	ENSG00000072571	protein_coding	5	163460203	163491941	1	HMMR	hyaluronan mediated motility receptor [Source:HGNC Symbol;Acc:HGNC:5012]
ENSG00000072657.10	119.834	-2.81369	1.39869	0.00126925	0.00778079	TRUE	29953	ENSG00000072657	protein_coding	12	72087266	72670758	1	TRHDE	thyrotropin releasing hormone degrading enzyme [Source:HGNC Symbol;Acc:HGNC:30748]
ENSG00000073111.14	549.731	-1.45471	0.483738	0.000238328	0.00207168	TRUE	4171	ENSG00000073111	protein_coding	3	127598410	127622436	1	MCM2	minichromosome maintenance complex component 2 [Source:HGNC Symbol;Acc:HGNC:6944]
ENSG00000073150.14	13.5187	-2.81081	0.673783	1.71423e-06	3.86253e-05	TRUE	56666	ENSG00000073150	protein_coding	22	50170731	50180295	1	PANX2	pannexin 2 [Source:HGNC Symbol;Acc:HGNC:8600]
ENSG00000073756.13	1529.56	-1.9098	0.684503	0.000305234	0.00252045	TRUE	5743	ENSG00000073756	protein_coding	1	186671791	186680922	-1	PTGS2	prostaglandin-endoperoxide synthase 2 [Source:HGNC Symbol;Acc:HGNC:9605]
ENSG00000074071.15	459.438	-1.31586	0.257964	4.39757e-08	1.88282e-06	TRUE	65993	ENSG00000074071	protein_coding	16	1771890	1773150	-1	MRPS34	mitochondrial ribosomal protein S34 [Source:HGNC Symbol;Acc:HGNC:16618]
ENSG00000074842.8	3119.71	-1.07869	0.248122	2.238e-06	4.80434e-05	TRUE	56005	ENSG00000074842	protein_coding	19	4641374	4670362	-1	MYDGF	myeloid derived growth factor [Source:HGNC Symbol;Acc:HGNC:16948]
ENSG00000074855.11	110.996	-1.18844	0.336712	5.65592e-05	0.000656024	TRUE	57719	ENSG00000074855	protein_coding	19	17323223	17334855	-1	ANO8	anoctamin 8 [Source:HGNC Symbol;Acc:HGNC:29329]
ENSG00000075218.19	511.327	-2.62388	0.57843	3.37507e-07	1.04654e-05	TRUE	51512	ENSG00000075218	protein_coding	22	46296870	46330810	1	GTSE1	G2 and S-phase expressed 1 [Source:HGNC Symbol;Acc:HGNC:13698]
ENSG00000075340.23	273.723	-2.92185	0.858413	3.16672e-05	0.000410928	TRUE	119	ENSG00000075340	protein_coding	2	70607618	70768225	-1	ADD2	adducin 2 [Source:HGNC Symbol;Acc:HGNC:244]
ENSG00000075461.6	8.29529	-6.12532	1.56675	1.18786e-07	4.30584e-06	TRUE	27092	ENSG00000075461	protein_coding	17	66964707	67033398	1	CACNG4	calcium voltage-gated channel auxiliary subunit gamma 4 [Source:HGNC Symbol;Acc:HGNC:1408]
ENSG00000075618.18	3369.06	-1.23737	0.357805	6.71735e-05	0.000749595	TRUE	6624	ENSG00000075618	protein_coding	7	5592816	5606655	1	FSCN1	fascin actin-bundling protein 1 [Source:HGNC Symbol;Acc:HGNC:11148]
ENSG00000075643.6	258.787	1.59079	0.525624	0.000170851	0.00158424	TRUE	55034	ENSG00000075643	protein_coding	18	36187497	36272157	1	MOCOS	molybdenum cofactor sulfurase [Source:HGNC Symbol;Acc:HGNC:18234]
ENSG00000075651.17	76.5357	1.1722	0.522974	0.00245843	0.0130204	TRUE	5337	ENSG00000075651	protein_coding	3	171600404	171810950	-1	PLD1	phospholipase D1 [Source:HGNC Symbol;Acc:HGNC:9067]
ENSG00000075702.19	180.216	-2.27859	0.4596	5.5698e-08	2.29153e-06	TRUE	284403	ENSG00000075702	protein_coding	19	36054649	36105108	1	WDR62	WD repeat domain 62 [Source:HGNC Symbol;Acc:HGNC:24502]
ENSG00000076382.17	1008.9	-2.40943	0.481125	3.63356e-08	1.60926e-06	TRUE	10615	ENSG00000076382	protein_coding	17	28577565	28599025	-1	SPAG5	sperm associated antigen 5 [Source:HGNC Symbol;Acc:HGNC:13452]
ENSG00000076662.10	105.978	-1.10328	0.286147	1.8193e-05	0.000262394	TRUE	3385	ENSG00000076662	protein_coding	19	10333776	10339661	-1	ICAM3	intercellular adhesion molecule 3 [Source:HGNC Symbol;Acc:HGNC:5346]
ENSG00000076706.17	1402.52	-2.54488	0.529861	9.88397e-08	3.70457e-06	TRUE	4162	ENSG00000076706	protein_coding	11	119308529	119321521	-1	MCAM	melanoma cell adhesion molecule [Source:HGNC Symbol;Acc:HGNC:6934]
ENSG00000076770.15	58.2811	1.24601	0.844269	0.00764488	0.0317915	TRUE	55796	ENSG00000076770	protein_coding	X	132369317	132489968	-1	MBNL3	muscleblind like splicing regulator 3 [Source:HGNC Symbol;Acc:HGNC:20564]
ENSG00000076864.21	6.17612	1.394	1.08519	0.00929688	0.0369459	TRUE	5909	ENSG00000076864	protein_coding	1	21596221	21669357	-1	RAP1GAP	RAP1 GTPase activating protein [Source:HGNC Symbol;Acc:HGNC:9858]
ENSG00000076928.18	734.364	-1.05971	0.316773	0.000122567	0.00121684	TRUE	100505585	ENSG00000076928	protein_coding	19	41883173	41930150	1	ARHGEF1	Rho guanine nucleotide exchange factor 1 [Source:HGNC Symbol;Acc:HGNC:681]
ENSG00000076928.18	734.364	-1.05971	0.316773	0.000122567	0.00121684	TRUE	9138	ENSG00000076928	protein_coding	19	41883173	41930150	1	ARHGEF1	Rho guanine nucleotide exchange factor 1 [Source:HGNC Symbol;Acc:HGNC:681]
ENSG00000077147.16	4977.56	1.40032	0.18506	4.33982e-15	1.50035e-12	TRUE	56889	ENSG00000077147	protein_coding	10	96518110	96587452	-1	TM9SF3	transmembrane 9 superfamily member 3 [Source:HGNC Symbol;Acc:HGNC:21529]
ENSG00000077152.11	316.926	-2.00574	0.457705	8.70692e-07	2.2918e-05	TRUE	29089	ENSG00000077152	protein_coding	1	202331657	202341980	-1	UBE2T	ubiquitin conjugating enzyme E2 T [Source:HGNC Symbol;Acc:HGNC:25009]
ENSG00000077454.17	259.19	-1.27546	0.335843	1.81835e-05	0.000262394	TRUE	4034	ENSG00000077454	protein_coding	7	100574011	100586129	-1	LRCH4	leucine rich repeats and calponin homology domain containing 4 [Source:HGNC Symbol;Acc:HGNC:6691]
ENSG00000077463.15	138.06	-1.26014	0.36995	8.18893e-05	0.000879371	TRUE	51548	ENSG00000077463	protein_coding	19	4174109	4182566	-1	SIRT6	sirtuin 6 [Source:HGNC Symbol;Acc:HGNC:14934]
ENSG00000077616.11	6.71001	2.29569	0.732512	0.000117233	0.00117248	TRUE	10003	ENSG00000077616	protein_coding	11	90131515	90192894	1	NAALAD2	N-acetylated alpha-linked acidic dipeptidase 2 [Source:HGNC Symbol;Acc:HGNC:14526]
ENSG00000078098.15	3326.64	1.08026	0.317127	0.000115198	0.00115719	TRUE	2191	ENSG00000078098	protein_coding	2	162170684	162245151	-1	FAP	fibroblast activation protein alpha [Source:HGNC Symbol;Acc:HGNC:3590]
ENSG00000078114.19	4.82951	-1.71558	2.36478	0.0045196	0.0210134	TRUE	10529	ENSG00000078114	protein_coding	10	20779973	21293011	-1	NEBL	nebulette [Source:HGNC Symbol;Acc:HGNC:16932]
ENSG00000078725.13	163.007	2.88055	0.82713	1.90379e-05	0.000272206	TRUE	1620	ENSG00000078725	protein_coding	9	119153458	119369435	-1	BRINP1	BMP/retinoic acid inducible neural specific 1 [Source:HGNC Symbol;Acc:HGNC:2687]
ENSG00000078814.18	4.13315	-1.06126	0.729776	0.0117821	0.0442457	TRUE	57644	ENSG00000078814	protein_coding	20	34955810	35002437	1	MYH7B	myosin heavy chain 7B [Source:HGNC Symbol;Acc:HGNC:15906]
ENSG00000079215.15	146.886	1.73479	0.65116	0.000416052	0.00321671	TRUE	6507	ENSG00000079215	protein_coding	5	36596588	36688334	1	SLC1A3	solute carrier family 1 member 3 [Source:HGNC Symbol;Acc:HGNC:10941]
ENSG00000079313.15	182.496	-1.07046	0.284671	2.88612e-05	0.000383622	TRUE	57455	ENSG00000079313	protein_coding	19	1815248	1848483	-1	REXO1	RNA exonuclease 1 homolog [Source:HGNC Symbol;Acc:HGNC:24616]
ENSG00000079435.10	13.9536	-2.50852	0.557139	3.84885e-07	1.16843e-05	TRUE	3991	ENSG00000079435	protein_coding	19	42401514	42427388	-1	LIPE	lipase E, hormone sensitive type [Source:HGNC Symbol;Acc:HGNC:6621]
ENSG00000079462.8	144.279	-2.11057	0.394956	7.30581e-09	4.10739e-07	TRUE	5050	ENSG00000079462	protein_coding	19	42297033	42303546	-1	PAFAH1B3	platelet activating factor acetylhydrolase 1b catalytic subunit 3 [Source:HGNC Symbol;Acc:HGNC:8576]
ENSG00000079616.14	730.77	-2.141	0.435521	6.46354e-08	2.59471e-06	TRUE	3835	ENSG00000079616	protein_coding	16	29790727	29805385	1	KIF22	kinesin family member 22 [Source:HGNC Symbol;Acc:HGNC:6391]
ENSG00000080546.14	388.578	1.16725	0.223747	2.5525e-08	1.21654e-06	TRUE	27244	ENSG00000080546	protein_coding	6	108984309	109094846	-1	SESN1	sestrin 1 [Source:HGNC Symbol;Acc:HGNC:21595]
ENSG00000080986.13	470.345	-2.16252	0.59121	1.61266e-05	0.000239417	TRUE	10403	ENSG00000080986	protein_coding	18	2571557	2616635	1	NDC80	NDC80 kinetochore complex component [Source:HGNC Symbol;Acc:HGNC:16909]
ENSG00000081052.14	20.1055	3.62629	0.890547	2.0298e-06	4.43132e-05	TRUE	1286	ENSG00000081052	protein_coding	2	227002714	227164453	-1	COL4A4	collagen type IV alpha 4 chain [Source:HGNC Symbol;Acc:HGNC:2206]
ENSG00000081320.11	743.059	1.00827	0.29303	9.77261e-05	0.00101417	TRUE	9262	ENSG00000081320	protein_coding	2	196133583	196176503	-1	STK17B	serine/threonine kinase 17b [Source:HGNC Symbol;Acc:HGNC:11396]
ENSG00000081377.17	938.541	1.25201	0.288269	1.70387e-06	3.85417e-05	TRUE	8555	ENSG00000081377	protein_coding	9	96490241	96619843	-1	CDC14B	cell division cycle 14B [Source:HGNC Symbol;Acc:HGNC:1719]
ENSG00000081665.14	198.642	1.18491	0.194362	1.4581e-10	1.57088e-08	TRUE	440515	ENSG00000081665	protein_coding	19	19785839	19821751	-1	ZNF506	zinc finger protein 506 [Source:HGNC Symbol;Acc:HGNC:23780]
ENSG00000081803.17	27.1321	2.1921	1.25073	0.00219721	0.0119358	TRUE	93664	ENSG00000081803	protein_coding	7	122318411	122886759	-1	CADPS2	calcium dependent secretion activator 2 [Source:HGNC Symbol;Acc:HGNC:16018]
ENSG00000082269.17	157.968	1.18158	0.183126	1.6677e-11	2.46045e-09	TRUE	57579	ENSG00000082269	protein_coding	6	70412941	70561174	1	FAM135A	family with sequence similarity 135 member A [Source:HGNC Symbol;Acc:HGNC:21084]
ENSG00000082482.14	3149.39	1.49268	0.324066	4.61171e-07	1.35136e-05	TRUE	3776	ENSG00000082482	protein_coding	1	215005775	215237090	1	KCNK2	potassium two pore domain channel subfamily K member 2 [Source:HGNC Symbol;Acc:HGNC:6277]
ENSG00000083454.22	47.8896	-2.32195	0.744425	9.83966e-05	0.00101794	TRUE	5026	ENSG00000083454	protein_coding	17	3672199	3696240	-1	P2RX5	purinergic receptor P2X 5 [Source:HGNC Symbol;Acc:HGNC:8536]
ENSG00000084207.18	3030.45	-1.34804	0.23178	7.58701e-10	6.16625e-08	TRUE	2950	ENSG00000084207	protein_coding	11	67583742	67586656	1	GSTP1	glutathione S-transferase pi 1 [Source:HGNC Symbol;Acc:HGNC:4638]
ENSG00000084710.14	112.578	-1.75192	0.54487	9.49642e-05	0.000989054	TRUE	22979	ENSG00000084710	protein_coding	2	25042076	25159135	1	EFR3B	EFR3 homolog B [Source:HGNC Symbol;Acc:HGNC:29155]
ENSG00000085276.19	21.8578	-1.11363	0.653256	0.00899735	0.0360127	TRUE	2122	ENSG00000085276	protein_coding	3	169083499	169663775	-1	MECOM	MDS1 and EVI1 complex locus [Source:HGNC Symbol;Acc:HGNC:3498]
ENSG00000085365.18	1065.26	1.08055	0.187534	1.37934e-09	1.00788e-07	TRUE	9522	ENSG00000085365	protein_coding	5	78360611	78480739	1	SCAMP1	secretory carrier membrane protein 1 [Source:HGNC Symbol;Acc:HGNC:10563]
ENSG00000085840.13	122.437	-1.65394	0.506115	8.80892e-05	0.000930844	TRUE	4998	ENSG00000085840	protein_coding	1	52372829	52404423	-1	ORC1	origin recognition complex subunit 1 [Source:HGNC Symbol;Acc:HGNC:8487]
ENSG00000085999.13	117.818	-1.36295	0.498294	0.000614351	0.00436242	TRUE	8438	ENSG00000085999	protein_coding	1	46246461	46278480	1	RAD54L	RAD54 like [Source:HGNC Symbol;Acc:HGNC:9826]
ENSG00000087258.16	5.07762	-2.67024	0.737208	1.61348e-05	0.000239417	TRUE	2775	ENSG00000087258	protein_coding	16	56191390	56357444	1	GNAO1	G protein subunit alpha o1 [Source:HGNC Symbol;Acc:HGNC:4389]
ENSG00000087586.18	741.688	-1.87414	0.532455	3.07079e-05	0.000401761	TRUE	6790	ENSG00000087586	protein_coding	20	56369389	56392337	-1	AURKA	aurora kinase A [Source:HGNC Symbol;Acc:HGNC:11393]
ENSG00000088325.16	1835.67	-1.89017	0.522363	2.10036e-05	0.0002952	TRUE	22974	ENSG00000088325	protein_coding	20	31739271	31801805	1	TPX2	TPX2 microtubule nucleation factor [Source:HGNC Symbol;Acc:HGNC:1249]
ENSG00000088387.21	370.601	1.33395	0.417938	0.000135532	0.00131739	TRUE	23348	ENSG00000088387	protein_coding	13	98793429	99086625	-1	DOCK9	dedicator of cytokinesis 9 [Source:HGNC Symbol;Acc:HGNC:14132]
ENSG00000088756.13	23.2967	1.96663	0.973468	0.00131043	0.00796886	TRUE	79822	ENSG00000088756	protein_coding	18	6729716	6915716	1	ARHGAP28	Rho GTPase activating protein 28 [Source:HGNC Symbol;Acc:HGNC:25509]
ENSG00000088826.18	199.322	-1.63908	0.341898	1.57446e-07	5.44315e-06	TRUE	54498	ENSG00000088826	protein_coding	20	4120980	4187747	1	SMOX	spermine oxidase [Source:HGNC Symbol;Acc:HGNC:15862]
ENSG00000089685.15	1035.48	-2.23471	0.539192	2.20521e-06	4.74716e-05	TRUE	332	ENSG00000089685	protein_coding	17	78214186	78225636	1	BIRC5	baculoviral IAP repeat containing 5 [Source:HGNC Symbol;Acc:HGNC:593]
ENSG00000090376.11	257.985	1.19584	0.38564	0.000221668	0.001956	TRUE	11213	ENSG00000090376	protein_coding	12	66189195	66254622	1	IRAK3	interleukin 1 receptor associated kinase 3 [Source:HGNC Symbol;Acc:HGNC:17020]
ENSG00000090530.10	528.286	-1.46629	0.539299	0.000544277	0.00396785	TRUE	55214	ENSG00000090530	protein_coding	3	189956728	190122437	-1	P3H2	prolyl 3-hydroxylase 2 [Source:HGNC Symbol;Acc:HGNC:19317]
ENSG00000090534.20	2.75818	1.83143	1.07917	0.00547102	0.0244313	TRUE	7066	ENSG00000090534	protein_coding	3	184371935	184381968	-1	THPO	thrombopoietin [Source:HGNC Symbol;Acc:HGNC:11795]
ENSG00000090889.12	528.888	-2.16214	0.535422	3.58207e-06	7.07947e-05	TRUE	24137	ENSG00000090889	protein_coding	X	70290104	70420886	1	KIF4A	kinesin family member 4A [Source:HGNC Symbol;Acc:HGNC:13339]
ENSG00000091490.11	1112.56	-1.54824	0.533819	0.000299706	0.00248464	TRUE	23231	ENSG00000091490	protein_coding	4	25747433	25863760	-1	SEL1L3	SEL1L family member 3 [Source:HGNC Symbol;Acc:HGNC:29108]
ENSG00000091513.16	4.24982	3.37617	1.04747	2.74459e-05	0.000367899	TRUE	7018	ENSG00000091513	protein_coding	3	133746040	133796641	1	TF	transferrin [Source:HGNC Symbol;Acc:HGNC:11740]
ENSG00000091651.9	253.346	-1.69195	0.453431	1.58897e-05	0.000236084	TRUE	23594	ENSG00000091651	protein_coding	16	46689643	46698394	1	ORC6	origin recognition complex subunit 6 [Source:HGNC Symbol;Acc:HGNC:17151]
ENSG00000091831.25	22.5969	1.70438	0.487667	3.42339e-05	0.000436652	TRUE	2099	ENSG00000091831	protein_coding	6	151656691	152129619	1	ESR1	estrogen receptor 1 [Source:HGNC Symbol;Acc:HGNC:3467]
ENSG00000091844.8	17.3149	2.24545	0.554764	3.06024e-06	6.23433e-05	TRUE	26575	ENSG00000091844	protein_coding	6	153004459	153131282	-1	RGS17	regulator of G protein signaling 17 [Source:HGNC Symbol;Acc:HGNC:14088]
ENSG00000092068.21	586.304	-1.02846	0.393175	0.00133671	0.00808064	TRUE	23428	ENSG00000092068	protein_coding	14	23125295	23183674	-1	SLC7A8	solute carrier family 7 member 8 [Source:HGNC Symbol;Acc:HGNC:11066]
ENSG00000092096.19	272.931	-1.1342	0.335195	9.94594e-05	0.00102755	TRUE	51310	ENSG00000092096	protein_coding	14	23346314	23352912	-1	SLC22A17	solute carrier family 22 member 17 [Source:HGNC Symbol;Acc:HGNC:23095]
ENSG00000092439.16	1394.31	1.01072	0.158735	3.61645e-11	4.60262e-09	TRUE	54822	ENSG00000092439	protein_coding	15	50552473	50686797	-1	TRPM7	transient receptor potential cation channel subfamily M member 7 [Source:HGNC Symbol;Acc:HGNC:17994]
ENSG00000092470.12	295.489	-1.08503	0.407397	0.00107107	0.00679518	TRUE	79968	ENSG00000092470	protein_coding	15	43826980	43868412	1	WDR76	WD repeat domain 76 [Source:HGNC Symbol;Acc:HGNC:25773]
ENSG00000092607.15	801.384	1.30807	0.279548	3.40509e-07	1.05303e-05	TRUE	6913	ENSG00000092607	protein_coding	1	118883046	118989556	-1	TBX15	T-box transcription factor 15 [Source:HGNC Symbol;Acc:HGNC:11594]
ENSG00000092820.19	3393.66	-1.23418	0.378252	0.000133282	0.00130097	TRUE	7430	ENSG00000092820	protein_coding	6	158765741	158819368	-1	EZR	ezrin [Source:HGNC Symbol;Acc:HGNC:12691]
ENSG00000092853.14	409.18	-1.53421	0.44519	5.11919e-05	0.000603746	TRUE	63967	ENSG00000092853	protein_coding	1	35720218	35769978	-1	CLSPN	claspin [Source:HGNC Symbol;Acc:HGNC:19715]
ENSG00000093009.11	198.211	-1.6599	0.543318	0.000173231	0.00160182	TRUE	8318	ENSG00000093009	protein_coding	22	19479457	19520612	1	CDC45	cell division cycle 45 [Source:HGNC Symbol;Acc:HGNC:1739]
ENSG00000093072.18	100.959	3.09039	0.685694	2.63407e-07	8.48582e-06	TRUE	51816	ENSG00000093072	protein_coding	22	17178790	17258235	-1	ADA2	adenosine deaminase 2 [Source:HGNC Symbol;Acc:HGNC:1839]
ENSG00000094804.12	406.571	-1.0335	0.520123	0.00586636	0.0258086	TRUE	990	ENSG00000094804	protein_coding	17	40287879	40304657	1	CDC6	cell division cycle 6 [Source:HGNC Symbol;Acc:HGNC:1744]
ENSG00000095383.20	600.031	-1.08364	0.357724	0.000357626	0.00285447	TRUE	55357	ENSG00000095383	protein_coding	9	98199011	98255649	-1	TBC1D2	TBC1 domain family member 2 [Source:HGNC Symbol;Acc:HGNC:18026]
ENSG00000095397.16	129.645	-1.08501	0.506499	0.00385465	0.018605	TRUE	25861	ENSG00000095397	protein_coding	9	114402080	114505473	-1	WHRN	whirlin [Source:HGNC Symbol;Acc:HGNC:16361]
ENSG00000095587.9	19.1378	-1.09722	0.710654	0.0109047	0.0416394	TRUE	7093	ENSG00000095587	protein_coding	10	96364608	96513926	-1	TLL2	tolloid like 2 [Source:HGNC Symbol;Acc:HGNC:11844]
ENSG00000095637.23	128.929	-1.18007	0.863938	0.0112257	0.0425707	TRUE	10580	ENSG00000095637	protein_coding	10	95311771	95561414	-1	SORBS1	sorbin and SH3 domain containing 1 [Source:HGNC Symbol;Acc:HGNC:14565]
ENSG00000095752.7	438.462	-2.7279	0.506643	4.47945e-09	2.68107e-07	TRUE	3589	ENSG00000095752	protein_coding	19	55364382	55370463	-1	IL11	interleukin 11 [Source:HGNC Symbol;Acc:HGNC:5966]
ENSG00000095906.17	242.193	-1.58229	0.479353	8.26574e-05	0.000885157	TRUE	10101	ENSG00000095906	protein_coding	16	1782932	1789186	1	NUBP2	nucleotide binding protein 2 [Source:HGNC Symbol;Acc:HGNC:8042]
ENSG00000097021.20	535.657	-1.56362	0.320917	1.11836e-07	4.07948e-06	TRUE	11332	ENSG00000097021	protein_coding	1	6264269	6393767	-1	ACOT7	acyl-CoA thioesterase 7 [Source:HGNC Symbol;Acc:HGNC:24157]
ENSG00000099203.7	434.231	-1.1534	0.296991	1.48537e-05	0.000224865	TRUE	11018	ENSG00000099203	protein_coding	19	10832067	10836318	-1	TMED1	transmembrane p24 trafficking protein 1 [Source:HGNC Symbol;Acc:HGNC:17291]
ENSG00000099260.12	51.6875	2.58761	1.0337	0.000380243	0.00299781	TRUE	54873	ENSG00000099260	protein_coding	1	99646113	99694541	1	PALMD	palmdelphin [Source:HGNC Symbol;Acc:HGNC:15846]
ENSG00000099364.18	184.911	-1.16834	0.251637	5.25806e-07	1.49941e-05	TRUE	54620	ENSG00000099364	protein_coding	16	30923055	30948783	1	FBXL19	F-box and leucine rich repeat protein 19 [Source:HGNC Symbol;Acc:HGNC:25300]
ENSG00000099385.12	556.482	-1.39489	0.284094	1.06631e-07	3.92815e-06	TRUE	9274	ENSG00000099385	protein_coding	16	30833626	30894302	-1	BCL7C	BAF chromatin remodeling complex subunit BCL7C [Source:HGNC Symbol;Acc:HGNC:1006]
ENSG00000099624.8	261.843	-1.38076	0.522672	0.00074982	0.00509627	TRUE	513	ENSG00000099624	protein_coding	19	1241746	1244825	1	ATP5F1D	ATP synthase F1 subunit delta [Source:HGNC Symbol;Acc:HGNC:837]
ENSG00000099625.14	31.4707	-1.77441	0.743016	0.000991328	0.00636246	TRUE	255057	ENSG00000099625	protein_coding	19	1228287	1238027	-1	CBARP	CACN subunit beta associated regulatory protein [Source:HGNC Symbol;Acc:HGNC:28617]
ENSG00000099795.7	432.711	-1.70827	0.574319	0.000212781	0.00189709	TRUE	4713	ENSG00000099795	protein_coding	19	14566078	14572066	-1	NDUFB7	NADH:ubiquinone oxidoreductase subunit B7 [Source:HGNC Symbol;Acc:HGNC:7702]
ENSG00000099800.8	520.306	-1.51213	0.343737	1.10469e-06	2.77528e-05	TRUE	26517	ENSG00000099800	protein_coding	19	2425625	2427586	-1	TIMM13	translocase of inner mitochondrial membrane 13 [Source:HGNC Symbol;Acc:HGNC:11816]
ENSG00000099804.9	415.552	-1.04311	0.274289	2.45924e-05	0.000335869	TRUE	997	ENSG00000099804	protein_coding	19	531760	542092	1	CDC34	cell division cycle 34, ubiqiutin conjugating enzyme [Source:HGNC Symbol;Acc:HGNC:1734]
ENSG00000099849.15	94.3738	-1.71982	0.619872	0.0003935	0.00308031	TRUE	8045	ENSG00000099849	protein_coding	11	560404	564025	1	RASSF7	Ras association domain family member 7 [Source:HGNC Symbol;Acc:HGNC:1166]
ENSG00000099889.14	24.5175	-1.47209	0.534065	0.000515991	0.0038027	TRUE	421	ENSG00000099889	protein_coding	22	19969896	20016823	-1	ARVCF	ARVCF delta catenin family member [Source:HGNC Symbol;Acc:HGNC:728]
ENSG00000099901.17	1042.31	-1.22291	0.236393	3.23494e-08	1.46064e-06	TRUE	5902	ENSG00000099901	protein_coding	22	20115938	20127355	1	RANBP1	RAN binding protein 1 [Source:HGNC Symbol;Acc:HGNC:9847]
ENSG00000100034.14	838.218	-1.23977	0.232547	1.36582e-08	7.19009e-07	TRUE	9647	ENSG00000100034	protein_coding	22	21919425	21952848	-1	PPM1F	protein phosphatase, Mg2+/Mn2+ dependent 1F [Source:HGNC Symbol;Acc:HGNC:19388]
ENSG00000100058.13	333.356	-1.06306	0.271165	1.48157e-05	0.000224592	TRUE	1416	ENSG00000100058	transcribed_unprocessed_pseudogene	22	25448080	25520856	1	CRYBB2P1	crystallin beta B2 pseudogene 1 [Source:HGNC Symbol;Acc:HGNC:2399]
ENSG00000100068.14	29.3561	-1.00535	0.364146	0.000936591	0.00606324	TRUE	NA	ENSG00000100068	transcribed_unprocessed_pseudogene	22	25351418	25405377	-1	LRP5L	LDL receptor related protein 5 like [Source:HGNC Symbol;Acc:HGNC:25323]
ENSG00000100092.24	32.4431	-1.18549	0.412738	0.00052396	0.00385134	TRUE	23616	ENSG00000100092	protein_coding	22	37634654	37656117	1	SH3BP1	SH3 domain binding protein 1 [Source:HGNC Symbol;Acc:HGNC:10824]
ENSG00000100116.17	98.8207	-1.05542	0.263064	1.03401e-05	0.000167021	TRUE	23464	ENSG00000100116	protein_coding	22	37807905	37817176	1	GCAT	glycine C-acetyltransferase [Source:HGNC Symbol;Acc:HGNC:4188]
ENSG00000100162.15	97.5034	-2.23486	0.54515	2.89266e-06	5.99846e-05	TRUE	79019	ENSG00000100162	protein_coding	22	41938737	41947152	-1	CENPM	centromere protein M [Source:HGNC Symbol;Acc:HGNC:18352]
ENSG00000100181.22	110.243	1.32867	1.01223	0.00819018	0.033482	TRUE	387590	ENSG00000100181	transcribed_unprocessed_pseudogene	22	16601887	16698742	1	TPTEP1	TPTE pseudogene 1 [Source:HGNC Symbol;Acc:HGNC:43648]
ENSG00000100242.16	2151.29	-1.23423	0.302262	5.83086e-06	0.000105598	TRUE	25777	ENSG00000100242	protein_coding	22	38733290	38794143	-1	SUN2	Sad1 and UNC84 domain containing 2 [Source:HGNC Symbol;Acc:HGNC:14210]
ENSG00000100258.18	1306.91	-1.36939	0.394418	5.48769e-05	0.000640682	TRUE	91289	ENSG00000100258	protein_coding	22	50502949	50507702	-1	LMF2	lipase maturation factor 2 [Source:HGNC Symbol;Acc:HGNC:25096]
ENSG00000100285.10	23.6483	-2.94218	0.755619	3.77322e-06	7.4067e-05	TRUE	4744	ENSG00000100285	protein_coding	22	29480218	29491390	1	NEFH	neurofilament heavy chain [Source:HGNC Symbol;Acc:HGNC:7737]
ENSG00000100297.16	682.461	-1.1269	0.522138	0.00340415	0.016797	TRUE	4174	ENSG00000100297	protein_coding	22	35400134	35425431	1	MCM5	minichromosome maintenance complex component 5 [Source:HGNC Symbol;Acc:HGNC:6948]
ENSG00000100300.18	1772.11	-1.59466	0.450021	3.37349e-05	0.000431236	TRUE	706	ENSG00000100300	protein_coding	22	43151547	43163242	1	TSPO	translocator protein [Source:HGNC Symbol;Acc:HGNC:1158]
ENSG00000100302.7	230.618	-2.24628	0.764769	0.000170331	0.00158068	TRUE	23551	ENSG00000100302	protein_coding	22	35540831	35553999	1	RASD2	RASD family member 2 [Source:HGNC Symbol;Acc:HGNC:18229]
ENSG00000100304.13	383.194	-1.28241	0.317865	6.93902e-06	0.00012158	TRUE	23170	ENSG00000100304	protein_coding	22	43166622	43187134	-1	TTLL12	tubulin tyrosine ligase like 12 [Source:HGNC Symbol;Acc:HGNC:28974]
ENSG00000100342.21	151.35	2.66961	0.488527	2.37713e-09	1.58678e-07	TRUE	8542	ENSG00000100342	protein_coding	22	36253071	36267530	1	APOL1	apolipoprotein L1 [Source:HGNC Symbol;Acc:HGNC:618]
ENSG00000100401.20	1905.88	-1.36551	0.293729	3.63322e-07	1.11024e-05	TRUE	5905	ENSG00000100401	protein_coding	22	41244779	41286187	-1	RANGAP1	Ran GTPase activating protein 1 [Source:HGNC Symbol;Acc:HGNC:9854]
ENSG00000100479.13	68.6397	-1.14643	0.382058	0.000369054	0.00292653	TRUE	5427	ENSG00000100479	protein_coding	14	49643555	49688422	-1	POLE2	DNA polymerase epsilon 2, accessory subunit [Source:HGNC Symbol;Acc:HGNC:9178]
ENSG00000100526.21	268.073	-1.29329	0.557892	0.00189034	0.0106122	TRUE	1033	ENSG00000100526	protein_coding	14	54396849	54420218	1	CDKN3	cyclin dependent kinase inhibitor 3 [Source:HGNC Symbol;Acc:HGNC:1791]
ENSG00000100558.9	147.423	-1.42026	0.46164	0.000194396	0.00175753	TRUE	26499	ENSG00000100558	protein_coding	14	67386984	67412167	-1	PLEK2	pleckstrin 2 [Source:HGNC Symbol;Acc:HGNC:19238]
ENSG00000100626.17	48.5537	2.60979	0.706949	9.17615e-06	0.000151495	TRUE	57452	ENSG00000100626	protein_coding	14	69259277	69357033	1	GALNT16	polypeptide N-acetylgalactosaminyltransferase 16 [Source:HGNC Symbol;Acc:HGNC:23233]
ENSG00000100629.17	125.835	-1.46705	0.385438	1.45308e-05	0.000220997	TRUE	145508	ENSG00000100629	protein_coding	14	80476983	80959517	-1	CEP128	centrosomal protein 128 [Source:HGNC Symbol;Acc:HGNC:20359]
ENSG00000100726.15	223.825	-1.33517	0.423282	0.00017541	0.00161809	TRUE	9894	ENSG00000100726	protein_coding	16	1493344	1510457	1	TELO2	telomere maintenance 2 [Source:HGNC Symbol;Acc:HGNC:29099]
ENSG00000100739.11	202.586	-2.59184	0.502987	1.59642e-08	8.18092e-07	TRUE	623	ENSG00000100739	protein_coding	14	96256210	96268967	1	BDKRB1	bradykinin receptor B1 [Source:HGNC Symbol;Acc:HGNC:1029]
ENSG00000100867.15	6.49513	-3.35556	1.03887	2.97463e-05	0.000391485	TRUE	10202	ENSG00000100867	protein_coding	14	23630115	23645639	1	DHRS2	dehydrogenase/reductase 2 [Source:HGNC Symbol;Acc:HGNC:18349]
ENSG00000100908.14	126.163	-1.10029	0.25176	2.12966e-06	4.61453e-05	TRUE	51016	ENSG00000100908	protein_coding	14	24138959	24141591	-1	EMC9	ER membrane protein complex subunit 9 [Source:HGNC Symbol;Acc:HGNC:20273]
ENSG00000101003.10	179.71	-1.00798	0.447108	0.00349756	0.0171495	TRUE	9837	ENSG00000101003	protein_coding	20	25407673	25452628	1	GINS1	GINS complex subunit 1 [Source:HGNC Symbol;Acc:HGNC:28980]
ENSG00000101017.14	35.8467	1.21919	0.921718	0.00970607	0.0380989	TRUE	958	ENSG00000101017	protein_coding	20	46118278	46129863	1	CD40	CD40 molecule [Source:HGNC Symbol;Acc:HGNC:11919]
ENSG00000101057.16	405.194	-2.07182	0.621068	5.32265e-05	0.000623614	TRUE	4605	ENSG00000101057	protein_coding	20	43667019	43716495	1	MYBL2	MYB proto-oncogene like 2 [Source:HGNC Symbol;Acc:HGNC:7548]
ENSG00000101115.13	8.64763	-1.84531	0.869669	0.00148001	0.00874529	TRUE	57167	ENSG00000101115	protein_coding	20	51782331	51802521	-1	SALL4	spalt like transcription factor 4 [Source:HGNC Symbol;Acc:HGNC:15924]
ENSG00000101187.16	5.64501	-3.86032	1.37079	0.000184992	0.00168284	TRUE	28231	ENSG00000101187	protein_coding	20	62642503	62685785	1	SLCO4A1	solute carrier organic anion transporter family member 4A1 [Source:HGNC Symbol;Acc:HGNC:10953]
ENSG00000101188.5	5.09191	-2.34091	2.04908	0.00564016	0.0250562	TRUE	4923	ENSG00000101188	protein_coding	20	62708836	62762771	1	NTSR1	neurotensin receptor 1 [Source:HGNC Symbol;Acc:HGNC:8039]
ENSG00000101194.18	899.773	-1.21047	0.357493	9.03091e-05	0.000948676	TRUE	63910	ENSG00000101194	protein_coding	20	62952707	62969585	1	SLC17A9	solute carrier family 17 member 9 [Source:HGNC Symbol;Acc:HGNC:16192]
ENSG00000101210.13	9.64147	-1.72067	0.93336	0.00209995	0.0115127	TRUE	1917	ENSG00000101210	protein_coding	20	63488013	63499239	-1	EEF1A2	eukaryotic translation elongation factor 1 alpha 2 [Source:HGNC Symbol;Acc:HGNC:3192]
ENSG00000101220.18	265.175	-1.48674	0.337347	1.10772e-06	2.77987e-05	TRUE	54976	ENSG00000101220	protein_coding	20	3753508	3767781	-1	C20orf27	chromosome 20 open reading frame 27 [Source:HGNC Symbol;Acc:HGNC:15873]
ENSG00000101224.18	924.515	-1.02672	0.318655	0.000211154	0.00188653	TRUE	994	ENSG00000101224	protein_coding	20	3786772	3806121	1	CDC25B	cell division cycle 25B [Source:HGNC Symbol;Acc:HGNC:1726]
ENSG00000101265.16	422.323	1.64081	0.505931	8.27639e-05	0.000885888	TRUE	9770	ENSG00000101265	protein_coding	20	4780023	4823608	-1	RASSF2	Ras association domain family member 2 [Source:HGNC Symbol;Acc:HGNC:9883]
ENSG00000101306.11	4.25082	-1.71042	0.716339	0.00132066	0.00802054	TRUE	85366	ENSG00000101306	protein_coding	20	31819308	31834689	1	MYLK2	myosin light chain kinase 2 [Source:HGNC Symbol;Acc:HGNC:16243]
ENSG00000101333.19	1303.54	1.19903	0.419134	0.000500314	0.00372032	TRUE	5332	ENSG00000101333	protein_coding	20	9067825	9504593	1	PLCB4	phospholipase C beta 4 [Source:HGNC Symbol;Acc:HGNC:9059]
ENSG00000101412.13	325.193	-1.82695	0.511215	2.60069e-05	0.000351868	TRUE	1869	ENSG00000101412	protein_coding	20	33675477	33686385	-1	E2F1	E2F transcription factor 1 [Source:HGNC Symbol;Acc:HGNC:3113]
ENSG00000101447.15	382.302	-2.24786	0.57412	5.76489e-06	0.000104752	TRUE	81610	ENSG00000101447	protein_coding	20	38926312	38953106	1	FAM83D	family with sequence similarity 83 member D [Source:HGNC Symbol;Acc:HGNC:16122]
ENSG00000101470.10	4.13316	2.02407	0.973907	0.00202164	0.0111866	TRUE	7125	ENSG00000101470	protein_coding	20	45823214	45833745	-1	TNNC2	troponin C2, fast skeletal type [Source:HGNC Symbol;Acc:HGNC:11944]
ENSG00000101638.14	5.62371	-2.49795	1.06119	0.000647377	0.00453987	TRUE	29906	ENSG00000101638	protein_coding	18	46667821	46759257	-1	ST8SIA5	ST8 alpha-N-acetyl-neuraminide alpha-2,8-sialyltransferase 5 [Source:HGNC Symbol;Acc:HGNC:17827]
ENSG00000101846.9	1237.81	1.66733	0.281075	2.58157e-10	2.49154e-08	TRUE	412	ENSG00000101846	protein_coding	X	7147237	7804358	1	STS	steroid sulfatase [Source:HGNC Symbol;Acc:HGNC:11425]
ENSG00000101856.10	4157.57	1.00314	0.191406	2.97723e-08	1.37648e-06	TRUE	10857	ENSG00000101856	protein_coding	X	119236245	119244466	1	PGRMC1	progesterone receptor membrane component 1 [Source:HGNC Symbol;Acc:HGNC:16090]
ENSG00000101935.12	321.431	1.04122	0.236055	1.7534e-06	3.93547e-05	TRUE	9949	ENSG00000101935	protein_coding	X	110194186	110440318	-1	AMMECR1	AMMECR nuclear protein 1 [Source:HGNC Symbol;Acc:HGNC:467]
ENSG00000101945.17	144.073	-1.70768	0.37513	4.87231e-07	1.41072e-05	TRUE	6839	ENSG00000101945	protein_coding	X	48695554	48709016	1	SUV39H1	suppressor of variegation 3-9 homolog 1 [Source:HGNC Symbol;Acc:HGNC:11479]
ENSG00000102189.17	1389.31	1.10261	0.189123	8.69201e-10	6.87143e-08	TRUE	8411	ENSG00000102189	protein_coding	12	92770637	92929331	-1	EEA1	early endosome antigen 1 [Source:HGNC Symbol;Acc:HGNC:3185]
ENSG00000102384.14	324.558	-1.36354	0.486823	0.000487433	0.00363972	TRUE	2491	ENSG00000102384	protein_coding	X	101098188	101166126	1	CENPI	centromere protein I [Source:HGNC Symbol;Acc:HGNC:3968]
ENSG00000102445.20	30.7364	2.02206	0.81389	0.000521819	0.00383711	TRUE	80183	ENSG00000102445	protein_coding	13	46334681	46438190	-1	RUBCNL	rubicon like autophagy enhancer [Source:HGNC Symbol;Acc:HGNC:20420]
ENSG00000102466.16	380.682	1.00641	0.504342	0.00567063	0.0251482	TRUE	2259	ENSG00000102466	protein_coding	13	101710804	102402457	-1	FGF14	fibroblast growth factor 14 [Source:HGNC Symbol;Acc:HGNC:3671]
ENSG00000102678.7	149.85	3.45859	1.27159	0.000155573	0.00147384	TRUE	2254	ENSG00000102678	protein_coding	13	21671073	21704498	1	FGF9	fibroblast growth factor 9 [Source:HGNC Symbol;Acc:HGNC:3687]
ENSG00000102760.13	257.484	4.13006	0.741345	1.00293e-09	7.64175e-08	TRUE	28984	ENSG00000102760	protein_coding	13	41457550	41470871	1	RGCC	regulator of cell cycle [Source:HGNC Symbol;Acc:HGNC:20369]
ENSG00000102796.12	58.1735	1.04092	0.291268	5.40444e-05	0.0006316	TRUE	79758	ENSG00000102796	protein_coding	13	51767993	51804163	-1	DHRS12	dehydrogenase/reductase 12 [Source:HGNC Symbol;Acc:HGNC:25832]
ENSG00000102854.16	4.20701	-3.37687	1.52179	0.000940455	0.00608485	TRUE	10232	ENSG00000102854	protein_coding	16	760734	768865	1	MSLN	mesothelin [Source:HGNC Symbol;Acc:HGNC:7371]
ENSG00000102879.16	11.4851	-2.37217	0.64413	1.49241e-05	0.000225644	TRUE	11151	ENSG00000102879	protein_coding	16	30182827	30189076	1	CORO1A	coronin 1A [Source:HGNC Symbol;Acc:HGNC:2252]
ENSG00000102901.13	938.659	-1.08696	0.262828	5.92503e-06	0.000107053	TRUE	80152	ENSG00000102901	protein_coding	16	67828157	67847811	-1	CENPT	centromere protein T [Source:HGNC Symbol;Acc:HGNC:25787]
ENSG00000102977.17	163.146	-1.14427	0.278534	6.23455e-06	0.000111171	TRUE	65057	ENSG00000102977	protein_coding	16	67657512	67660815	-1	ACD	ACD shelterin complex subunit and telomerase recruitment factor [Source:HGNC Symbol;Acc:HGNC:25070]
ENSG00000103024.8	82.3659	-1.7161	0.597432	0.000293807	0.00244712	TRUE	4832	ENSG00000103024	protein_coding	16	1770320	1771561	-1	NME3	NME/NM23 nucleoside diphosphate kinase 3 [Source:HGNC Symbol;Acc:HGNC:7851]
ENSG00000103121.9	387.218	-1.06686	0.220861	2.4156e-07	7.85851e-06	TRUE	56942	ENSG00000103121	protein_coding	16	80966448	81020270	-1	CMC2	C-X9-C motif containing 2 [Source:HGNC Symbol;Acc:HGNC:24447]
ENSG00000103152.12	447.876	-1.32586	0.403867	0.00011247	0.00113514	TRUE	4350	ENSG00000103152	protein_coding	16	77007	85851	1	MPG	N-methylpurine DNA glycosylase [Source:HGNC Symbol;Acc:HGNC:7211]
ENSG00000103253.19	32.7603	-1.455	0.590974	0.00111147	0.00699591	TRUE	84264	ENSG00000103253	protein_coding	16	726936	735525	1	HAGHL	hydroxyacylglutathione hydrolase like [Source:HGNC Symbol;Acc:HGNC:14177]
ENSG00000103254.10	42.12	-1.39705	0.503746	0.000548959	0.00399859	TRUE	65990	ENSG00000103254	protein_coding	16	720581	722590	1	ANTKMT	adenine nucleotide translocase lysine methyltransferase [Source:HGNC Symbol;Acc:HGNC:14152]
ENSG00000103257.9	1519.75	-1.00623	0.542297	0.0078094	0.0323305	TRUE	8140	ENSG00000103257	protein_coding	16	87830023	87869507	-1	SLC7A5	solute carrier family 7 member 5 [Source:HGNC Symbol;Acc:HGNC:11063]
ENSG00000103260.9	188.883	-1.86261	0.387753	1.25141e-07	4.49402e-06	TRUE	79006	ENSG00000103260	protein_coding	16	715118	719655	1	METRN	meteorin, glial cell differentiation regulator [Source:HGNC Symbol;Acc:HGNC:14151]
ENSG00000103269.14	7.0314	-1.20577	0.582527	0.00405223	0.019333	TRUE	9028	ENSG00000103269	protein_coding	16	675671	678268	1	RHBDL1	rhomboid like 1 [Source:HGNC Symbol;Acc:HGNC:10007]
ENSG00000103326.12	212.904	-1.21581	0.378133	0.000164932	0.00154108	TRUE	6650	ENSG00000103326	protein_coding	16	527712	554636	1	CAPN15	calpain 15 [Source:HGNC Symbol;Acc:HGNC:11182]
ENSG00000103363.16	1246.05	-1.14204	0.429666	0.000981654	0.00631788	TRUE	6923	ENSG00000103363	protein_coding	16	2771414	2777289	-1	ELOB	elongin B [Source:HGNC Symbol;Acc:HGNC:11619]
ENSG00000103449.13	294.44	-1.33067	0.529234	0.00110616	0.00697086	TRUE	6299	ENSG00000103449	protein_coding	16	51135982	51152334	-1	SALL1	spalt like transcription factor 1 [Source:HGNC Symbol;Acc:HGNC:10524]
ENSG00000103811.18	28.6533	1.18546	0.506233	0.00181443	0.0102707	TRUE	1512	ENSG00000103811	protein_coding	15	78921058	78949574	-1	CTSH	cathepsin H [Source:HGNC Symbol;Acc:HGNC:2535]
ENSG00000103888.17	44019	1.25858	0.729838	0.00725807	0.0305615	TRUE	57214	ENSG00000103888	protein_coding	15	80779343	80951776	1	CEMIP	cell migration inducing hyaluronidase 1 [Source:HGNC Symbol;Acc:HGNC:29213]
ENSG00000103942.13	296.174	-1.86637	0.537895	3.65884e-05	0.000460096	TRUE	9455	ENSG00000103942	protein_coding	15	82836946	82986153	-1	HOMER2	homer scaffold protein 2 [Source:HGNC Symbol;Acc:HGNC:17513]
ENSG00000103995.14	186.887	-1.24816	0.300582	4.3586e-06	8.30248e-05	TRUE	22995	ENSG00000103995	protein_coding	15	48712928	48811146	-1	CEP152	centrosomal protein 152 [Source:HGNC Symbol;Acc:HGNC:29298]
ENSG00000104047.15	840.255	1.31994	0.220953	2.76515e-10	2.63577e-08	TRUE	56986	ENSG00000104047	protein_coding	15	49621037	49656232	1	DTWD1	DTW domain containing 1 [Source:HGNC Symbol;Acc:HGNC:30926]
ENSG00000104147.9	60.4353	-1.75389	0.485789	2.45418e-05	0.000335574	TRUE	11339	ENSG00000104147	protein_coding	15	41309273	41332591	-1	OIP5	Opa interacting protein 5 [Source:HGNC Symbol;Acc:HGNC:20300]
ENSG00000104177.19	69.9203	-1.6119	0.60719	0.000587986	0.00421266	TRUE	50804	ENSG00000104177	protein_coding	15	48134632	48178353	-1	MYEF2	myelin expression factor 2 [Source:HGNC Symbol;Acc:HGNC:17940]
ENSG00000104213.13	49.0212	1.5183	1.66191	0.00737941	0.030943	TRUE	5157	ENSG00000104213	protein_coding	8	17576433	17644071	1	PDGFRL	platelet derived growth factor receptor like [Source:HGNC Symbol;Acc:HGNC:8805]
ENSG00000104327.7	1.67913	1.71846	1.27568	0.0078388	0.0324356	TRUE	793	ENSG00000104327	protein_coding	8	90058608	90095475	-1	CALB1	calbindin 1 [Source:HGNC Symbol;Acc:HGNC:1434]
ENSG00000104343.21	434.405	1.05236	0.224568	4.63097e-07	1.35352e-05	TRUE	55284	ENSG00000104343	protein_coding	8	73780097	73878910	-1	UBE2W	ubiquitin conjugating enzyme E2 W [Source:HGNC Symbol;Acc:HGNC:25616]
ENSG00000104361.10	1195.44	1.43427	0.187155	1.95191e-15	6.99785e-13	TRUE	79815	ENSG00000104361	protein_coding	8	98189826	98294393	-1	NIPAL2	NIPA like domain containing 2 [Source:HGNC Symbol;Acc:HGNC:25854]
ENSG00000104415.14	844.671	1.88219	0.66647	0.000251096	0.00216455	TRUE	8840	ENSG00000104415	protein_coding	8	133191039	133231690	1	CCN4	cellular communication network factor 4 [Source:HGNC Symbol;Acc:HGNC:12769]
ENSG00000104435.14	1813.78	-1.20431	0.703721	0.00706151	0.0298859	TRUE	11075	ENSG00000104435	protein_coding	8	79611117	79666158	1	STMN2	stathmin 2 [Source:HGNC Symbol;Acc:HGNC:10577]
ENSG00000104450.13	60.4838	-1.24194	0.298048	4.00028e-06	7.77937e-05	TRUE	6674	ENSG00000104450	protein_coding	8	100157906	100259278	1	SPAG1	sperm associated antigen 1 [Source:HGNC Symbol;Acc:HGNC:11212]
ENSG00000104522.16	568.532	-1.02015	0.214463	3.71127e-07	1.13111e-05	TRUE	7264	ENSG00000104522	protein_coding	8	143612618	143618048	-1	GFUS	GDP-L-fucose synthase [Source:HGNC Symbol;Acc:HGNC:12390]
ENSG00000104524.14	157.951	-1.20733	0.348621	6.94807e-05	0.000766737	TRUE	65263	ENSG00000104524	protein_coding	8	143603210	143609773	-1	PYCR3	pyrroline-5-carboxylate reductase 3 [Source:HGNC Symbol;Acc:HGNC:25846]
ENSG00000104783.15	106.366	-1.27311	0.690009	8.3597e-05	0.000893978	TRUE	3783	ENSG00000104783	protein_coding	19	43766533	43780976	-1	KCNN4	potassium calcium-activated channel subfamily N member 4 [Source:HGNC Symbol;Acc:HGNC:6293]
ENSG00000104825.17	201.536	-1.01539	0.292566	9.22355e-05	0.000965845	TRUE	4793	ENSG00000104825	protein_coding	19	38899700	38908893	1	NFKBIB	NFKB inhibitor beta [Source:HGNC Symbol;Acc:HGNC:7798]
ENSG00000104826.15	12.3114	-2.57389	0.827678	0.000111472	0.00112654	TRUE	3972	ENSG00000104826	protein_coding	19	49015980	49017091	-1	LHB	luteinizing hormone subunit beta [Source:HGNC Symbol;Acc:HGNC:6584]
ENSG00000104827.12	19.2789	-2.7942	1.09577	0.000382711	0.00301419	TRUE	1082	ENSG00000104827	protein_coding	19	49022869	49024333	-1	CGB3	chorionic gonadotropin subunit beta 3 [Source:HGNC Symbol;Acc:HGNC:1886]
ENSG00000104848.2	39.3708	-1.44127	0.945076	0.00641451	0.0277304	TRUE	3743	ENSG00000104848	protein_coding	19	49067397	49072699	-1	KCNA7	potassium voltage-gated channel subfamily A member 7 [Source:HGNC Symbol;Acc:HGNC:6226]
ENSG00000104863.12	55.6683	-1.69704	0.459449	1.79602e-05	0.000259846	TRUE	64130	ENSG00000104863	protein_coding	19	49114324	49118460	1	LIN7B	lin-7 homolog B, crumbs cell polarity complex component [Source:HGNC Symbol;Acc:HGNC:17788]
ENSG00000104886.12	406.908	-1.29635	0.222254	7.5652e-10	6.16625e-08	TRUE	55111	ENSG00000104886	protein_coding	19	2230084	2237704	-1	PLEKHJ1	pleckstrin homology domain containing J1 [Source:HGNC Symbol;Acc:HGNC:18211]
ENSG00000104889.7	335.949	-2.1106	0.451211	2.13735e-07	7.0624e-06	TRUE	10535	ENSG00000104889	protein_coding	19	12806584	12813640	1	RNASEH2A	ribonuclease H2 subunit A [Source:HGNC Symbol;Acc:HGNC:18518]
ENSG00000104897.10	257.808	-1.09273	0.370208	0.000460629	0.00348109	TRUE	8175	ENSG00000104897	protein_coding	19	2236824	2248655	1	SF3A2	splicing factor 3a subunit 2 [Source:HGNC Symbol;Acc:HGNC:10766]
ENSG00000104899.8	4.72314	-1.32406	0.866352	0.00907151	0.0362282	TRUE	268	ENSG00000104899	protein_coding	19	2249309	2252073	1	AMH	anti-Mullerian hormone [Source:HGNC Symbol;Acc:HGNC:464]
ENSG00000104960.15	992.005	-1.00235	0.340726	0.000512373	0.00378447	TRUE	53635	ENSG00000104960	protein_coding	19	49850735	49860744	1	PTOV1	PTOV1 extended AT-hook containing adaptor protein [Source:HGNC Symbol;Acc:HGNC:9632]
ENSG00000104976.12	255.111	-1.21007	0.352411	7.82863e-05	0.000847754	TRUE	6618	ENSG00000104976	protein_coding	19	7920338	7923250	1	SNAPC2	small nuclear RNA activating complex polypeptide 2 [Source:HGNC Symbol;Acc:HGNC:11135]
ENSG00000104998.4	55.8568	-1.04591	0.379379	0.000917903	0.00596058	TRUE	9466	ENSG00000104998	protein_coding	19	14031762	14053218	1	IL27RA	interleukin 27 receptor subunit alpha [Source:HGNC Symbol;Acc:HGNC:17290]
ENSG00000105011.9	292.198	-1.91231	0.532419	2.32927e-05	0.00032134	TRUE	55723	ENSG00000105011	protein_coding	19	14119512	14136613	-1	ASF1B	anti-silencing function 1B histone chaperone [Source:HGNC Symbol;Acc:HGNC:20996]
ENSG00000105255.11	27.5683	-1.77923	0.320022	3.05762e-09	1.96188e-07	TRUE	79187	ENSG00000105255	protein_coding	19	4304598	4323843	1	FSD1	fibronectin type III and SPRY domain containing 1 [Source:HGNC Symbol;Acc:HGNC:13745]
ENSG00000105325.15	540.717	-1.21136	0.298416	6.76872e-06	0.000119227	TRUE	51343	ENSG00000105325	protein_coding	19	3506311	3538334	1	FZR1	fizzy and cell division cycle 20 related 1 [Source:HGNC Symbol;Acc:HGNC:24824]
ENSG00000105355.9	4198.45	-1.01197	0.172904	8.92237e-10	7.02955e-08	TRUE	10226	ENSG00000105355	protein_coding	19	4838341	4867694	-1	PLIN3	perilipin 3 [Source:HGNC Symbol;Acc:HGNC:16893]
ENSG00000105364.14	340.561	-1.08434	0.362916	0.000413847	0.00320172	TRUE	51073	ENSG00000105364	protein_coding	19	10251901	10260055	1	MRPL4	mitochondrial ribosomal protein L4 [Source:HGNC Symbol;Acc:HGNC:14276]
ENSG00000105464.4	78.9358	-1.42825	0.45037	0.000145303	0.0013879	TRUE	2906	ENSG00000105464	protein_coding	19	48393668	48444931	1	GRIN2D	glutamate ionotropic receptor NMDA type subunit 2D [Source:HGNC Symbol;Acc:HGNC:4588]
ENSG00000105472.14	963.594	-1.0118	0.318539	0.000252182	0.00217067	TRUE	6320	ENSG00000105472	protein_coding	19	50723364	50725708	1	CLEC11A	C-type lectin domain containing 11A [Source:HGNC Symbol;Acc:HGNC:10576]
ENSG00000105486.14	331.767	-1.1447	0.395417	0.000496872	0.00370005	TRUE	3978	ENSG00000105486	protein_coding	19	48115445	48170603	-1	LIG1	DNA ligase 1 [Source:HGNC Symbol;Acc:HGNC:6598]
ENSG00000105617.4	104.124	-1.07341	0.285593	2.90691e-05	0.000385861	TRUE	79165	ENSG00000105617	protein_coding	19	54155161	54159721	-1	LENG1	leukocyte receptor cluster member 1 [Source:HGNC Symbol;Acc:HGNC:15502]
ENSG00000105619.14	155.207	-1.26532	0.302706	3.81125e-06	7.4682e-05	TRUE	29844	ENSG00000105619	protein_coding	19	54107020	54115657	-1	TFPT	TCF3 fusion partner [Source:HGNC Symbol;Acc:HGNC:13630]
ENSG00000105669.14	1242.9	-1.37508	0.332617	3.98403e-06	7.76131e-05	TRUE	11316	ENSG00000105669	protein_coding	19	18899514	18919387	-1	COPE	COPI coat complex subunit epsilon [Source:HGNC Symbol;Acc:HGNC:2234]
ENSG00000105699.17	24.8128	-1.02046	0.450805	0.00347049	0.017042	TRUE	51599	ENSG00000105699	protein_coding	19	35248330	35267964	1	LSR	lipolysis stimulated lipoprotein receptor [Source:HGNC Symbol;Acc:HGNC:29572]
ENSG00000105792.19	82.1902	2.34105	0.4253	1.6029e-09	1.1424e-07	TRUE	79846	ENSG00000105792	protein_coding	7	90245174	90311063	1	CFAP69	cilia and flagella associated protein 69 [Source:HGNC Symbol;Acc:HGNC:26107]
ENSG00000105825.14	2927.07	-2.37624	0.852077	0.000251955	0.00216953	TRUE	7980	ENSG00000105825	protein_coding	7	93885396	93890753	-1	TFPI2	tissue factor pathway inhibitor 2 [Source:HGNC Symbol;Acc:HGNC:11761]
ENSG00000105855.10	276.537	1.77396	0.503219	2.71968e-05	0.000365406	TRUE	3696	ENSG00000105855	protein_coding	7	20330702	20415754	1	ITGB8	integrin subunit beta 8 [Source:HGNC Symbol;Acc:HGNC:6163]
ENSG00000105963.15	31.4927	-1.53796	0.679413	0.00167114	0.00962182	TRUE	11033	ENSG00000105963	protein_coding	7	897900	955407	-1	ADAP1	ArfGAP with dual PH domains 1 [Source:HGNC Symbol;Acc:HGNC:16486]
ENSG00000106009.16	272.25	-1.04132	0.394929	0.00125058	0.00768994	TRUE	221927	ENSG00000106009	protein_coding	7	2537810	2555694	-1	BRAT1	BRCA1 associated ATM activator 1 [Source:HGNC Symbol;Acc:HGNC:21701]
ENSG00000106031.9	33.7334	1.28838	0.673295	0.00399539	0.019117	TRUE	3209	ENSG00000106031	protein_coding	7	27193503	27200091	-1	HOXA13	homeobox A13 [Source:HGNC Symbol;Acc:HGNC:5102]
ENSG00000106034.18	851.647	1.349	0.419435	0.000123304	0.00122212	TRUE	79974	ENSG00000106034	protein_coding	7	120988697	121297442	1	CPED1	cadherin like and PC-esterase domain containing 1 [Source:HGNC Symbol;Acc:HGNC:26159]
ENSG00000106049.9	954.435	1.19132	0.203115	6.30996e-10	5.38802e-08	TRUE	11112	ENSG00000106049	protein_coding	7	27525442	27662883	-1	HIBADH	3-hydroxyisobutyrate dehydrogenase [Source:HGNC Symbol;Acc:HGNC:4907]
ENSG00000106069.24	15.0907	1.03433	0.670322	0.0116723	0.0438975	TRUE	1124	ENSG00000106069	protein_coding	7	29146569	29514328	1	CHN2	chimerin 2 [Source:HGNC Symbol;Acc:HGNC:1944]
ENSG00000106077.19	103.619	-1.01056	0.255741	1.48541e-05	0.000224865	TRUE	83451	ENSG00000106077	protein_coding	7	73736094	73738852	-1	ABHD11	abhydrolase domain containing 11 [Source:HGNC Symbol;Acc:HGNC:16407]
ENSG00000106089.12	136.749	-1.11562	0.343834	0.000165154	0.00154253	TRUE	6804	ENSG00000106089	protein_coding	7	73699206	73719672	-1	STX1A	syntaxin 1A [Source:HGNC Symbol;Acc:HGNC:11433]
ENSG00000106211.10	4015.12	-1.34508	0.481316	0.000488814	0.00364651	TRUE	3315	ENSG00000106211	protein_coding	7	76302673	76304295	1	HSPB1	heat shock protein family B (small) member 1 [Source:HGNC Symbol;Acc:HGNC:5246]
ENSG00000106236.4	21.9814	-4.49019	0.797023	7.79238e-10	6.26461e-08	TRUE	4885	ENSG00000106236	protein_coding	7	98617285	98629869	1	NPTX2	neuronal pentraxin 2 [Source:HGNC Symbol;Acc:HGNC:7953]
ENSG00000106268.16	194.999	-1.17593	0.431553	0.000788702	0.00527693	TRUE	4521	ENSG00000106268	protein_coding	7	2242226	2251146	1	NUDT1	nudix hydrolase 1 [Source:HGNC Symbol;Acc:HGNC:8048]
ENSG00000106299.8	916.076	1.25374	0.128101	1.56405e-23	5.17544e-20	TRUE	8976	ENSG00000106299	protein_coding	7	123681943	123749003	-1	WASL	WASP like actin nucleation promoting factor [Source:HGNC Symbol;Acc:HGNC:12735]
ENSG00000106462.12	395.186	-1.34816	0.375438	3.64995e-05	0.000459727	TRUE	2146	ENSG00000106462	protein_coding	7	148807257	148884321	-1	EZH2	enhancer of zeste 2 polycomb repressive complex 2 subunit [Source:HGNC Symbol;Acc:HGNC:3527]
ENSG00000106560.11	4.95533	1.88353	1.4987	0.00661986	0.0284271	TRUE	26157	ENSG00000106560	protein_coding	7	150685697	150693641	1	GIMAP2	GTPase, IMAP family member 2 [Source:HGNC Symbol;Acc:HGNC:21789]
ENSG00000106772.19	1459.01	1.02523	0.370397	0.000821307	0.00544942	TRUE	158471	ENSG00000106772	protein_coding	9	76611376	76906114	-1	PRUNE2	prune homolog 2 with BCH domain [Source:HGNC Symbol;Acc:HGNC:25209]
ENSG00000106789.13	43.5949	-1.24602	0.578197	0.00281379	0.0145223	TRUE	7464	ENSG00000106789	protein_coding	9	98120975	98192637	-1	CORO2A	coronin 2A [Source:HGNC Symbol;Acc:HGNC:2255]
ENSG00000106799.13	1869.18	1.07891	0.295923	3.98593e-05	0.00049162	TRUE	7046	ENSG00000106799	protein_coding	9	99104038	99154192	1	TGFBR1	transforming growth factor beta receptor 1 [Source:HGNC Symbol;Acc:HGNC:11772]
ENSG00000106823.13	401.696	3.58953	0.421677	7.44228e-19	7.98863e-16	TRUE	1842	ENSG00000106823	protein_coding	9	92493554	92536655	-1	ECM2	extracellular matrix protein 2 [Source:HGNC Symbol;Acc:HGNC:3154]
ENSG00000107130.10	1494.76	-1.01674	0.175102	1.2494e-09	9.27559e-08	TRUE	23413	ENSG00000107130	protein_coding	9	130172404	130237303	1	NCS1	neuronal calcium sensor 1 [Source:HGNC Symbol;Acc:HGNC:3953]
ENSG00000107281.10	441.897	-1.46389	0.518308	0.000408467	0.00316856	TRUE	56654	ENSG00000107281	protein_coding	9	137039463	137046179	-1	NPDC1	neural proliferation, differentiation and control 1 [Source:HGNC Symbol;Acc:HGNC:7899]
ENSG00000107317.13	17.7609	3.41295	1.25659	0.00019167	0.00173654	TRUE	5730	ENSG00000107317	protein_coding	9	136975092	136981742	1	PTGDS	prostaglandin D2 synthase [Source:HGNC Symbol;Acc:HGNC:9592]
ENSG00000107404.21	733.645	-2.11087	0.376942	1.67355e-09	1.18909e-07	TRUE	1855	ENSG00000107404	protein_coding	1	1335276	1349418	-1	DVL1	dishevelled segment polarity protein 1 [Source:HGNC Symbol;Acc:HGNC:3084]
ENSG00000107736.22	16.6086	-1.85527	1.38313	0.00475856	0.0218784	TRUE	64072	ENSG00000107736	protein_coding	10	71396920	71815947	1	CDH23	cadherin related 23 [Source:HGNC Symbol;Acc:HGNC:13733]
ENSG00000107864.15	28.0346	1.40953	0.328051	1.73437e-06	3.90031e-05	TRUE	22849	ENSG00000107864	protein_coding	10	92046692	92291078	-1	CPEB3	cytoplasmic polyadenylation element binding protein 3 [Source:HGNC Symbol;Acc:HGNC:21746]
ENSG00000107872.14	41.0972	-1.43864	0.545399	0.000738788	0.00504052	TRUE	79176	ENSG00000107872	protein_coding	10	102419189	102423136	1	FBXL15	F-box and leucine rich repeat protein 15 [Source:HGNC Symbol;Acc:HGNC:28155]
ENSG00000108106.14	664.006	-2.37226	0.479018	4.98112e-08	2.08263e-06	TRUE	27338	ENSG00000108106	protein_coding	19	55399745	55407788	-1	UBE2S	ubiquitin conjugating enzyme E2 S [Source:HGNC Symbol;Acc:HGNC:17895]
ENSG00000108239.9	279.775	1.50305	0.223747	1.85757e-12	3.52679e-10	TRUE	23232	ENSG00000108239	protein_coding	10	94402541	94536332	1	TBC1D12	TBC1 domain family member 12 [Source:HGNC Symbol;Acc:HGNC:29082]
ENSG00000108381.11	57.6703	3.13641	0.64654	4.69233e-08	1.97975e-06	TRUE	443	ENSG00000108381	protein_coding	17	3472374	3503405	1	ASPA	aspartoacylase [Source:HGNC Symbol;Acc:HGNC:756]
ENSG00000108448.23	141.361	1.14344	0.289276	1.06453e-05	0.000171472	TRUE	147166	ENSG00000108448	transcribed_unprocessed_pseudogene	17	18697998	18736118	1	TRIM16L	tripartite motif containing 16 like [Source:HGNC Symbol;Acc:HGNC:32670]
ENSG00000108479.13	167.313	-1.08917	0.416006	0.0012255	0.00756508	TRUE	2584	ENSG00000108479	protein_coding	17	75751594	75765236	-1	GALK1	galactokinase 1 [Source:HGNC Symbol;Acc:HGNC:4118]
ENSG00000108511.10	204.803	-1.50387	0.371935	4.95102e-06	9.18179e-05	TRUE	3216	ENSG00000108511	protein_coding	17	48595751	48604992	-1	HOXB6	homeobox B6 [Source:HGNC Symbol;Acc:HGNC:5117]
ENSG00000108515.18	105.682	-1.57863	0.439718	2.8907e-05	0.000383929	TRUE	2027	ENSG00000108515	protein_coding	17	4948092	4957131	1	ENO3	enolase 3 [Source:HGNC Symbol;Acc:HGNC:3354]
ENSG00000108557.20	496.233	-1.41124	0.223876	3.67024e-11	4.64556e-09	TRUE	10743	ENSG00000108557	protein_coding	17	17681458	17811453	1	RAI1	retinoic acid induced 1 [Source:HGNC Symbol;Acc:HGNC:9834]
ENSG00000108691.9	149.235	1.05796	0.572065	0.00666356	0.0285777	TRUE	6347	ENSG00000108691	protein_coding	17	34255218	34257203	1	CCL2	C-C motif chemokine ligand 2 [Source:HGNC Symbol;Acc:HGNC:10618]
ENSG00000108798.9	9.60642	-2.42323	0.928628	0.00047692	0.00357505	TRUE	51225	ENSG00000108798	protein_coding	17	49210411	49223225	1	ABI3	ABI family member 3 [Source:HGNC Symbol;Acc:HGNC:29859]
ENSG00000108846.16	747.616	1.34774	0.49816	0.000602164	0.00429695	TRUE	8714	ENSG00000108846	protein_coding	17	50634777	50692253	1	ABCC3	ATP binding cassette subfamily C member 3 [Source:HGNC Symbol;Acc:HGNC:54]
ENSG00000108984.15	61.0763	1.51249	0.556513	0.000464961	0.00350377	TRUE	5608	ENSG00000108984	protein_coding	17	69414697	69553865	1	MAP2K6	mitogen-activated protein kinase kinase 6 [Source:HGNC Symbol;Acc:HGNC:6846]
ENSG00000109099.16	2769.55	1.17813	0.344082	9.13246e-05	0.000957606	TRUE	5376	ENSG00000109099	protein_coding	17	15229773	15272292	-1	PMP22	peripheral myelin protein 22 [Source:HGNC Symbol;Acc:HGNC:9118]
ENSG00000109452.13	491.709	1.44271	0.438495	8.90207e-05	0.000939401	TRUE	8821	ENSG00000109452	protein_coding	4	142023160	142847432	-1	INPP4B	inositol polyphosphate-4-phosphatase type II B [Source:HGNC Symbol;Acc:HGNC:6075]
ENSG00000109472.14	1128.73	1.95533	0.52506	1.20236e-05	0.000189845	TRUE	1363	ENSG00000109472	protein_coding	4	165361194	165498547	1	CPE	carboxypeptidase E [Source:HGNC Symbol;Acc:HGNC:2303]
ENSG00000109674.4	99.1582	-1.08112	0.537912	0.0051627	0.0233823	TRUE	55247	ENSG00000109674	protein_coding	4	177309874	177362936	1	NEIL3	nei like DNA glycosylase 3 [Source:HGNC Symbol;Acc:HGNC:24573]
ENSG00000109736.15	549.698	-1.23859	0.374861	0.000116445	0.00116561	TRUE	10227	ENSG00000109736	protein_coding	4	2930561	2934834	-1	MFSD10	major facilitator superfamily domain containing 10 [Source:HGNC Symbol;Acc:HGNC:16894]
ENSG00000109738.11	181.742	1.1742	0.389286	0.000296934	0.00246873	TRUE	2743	ENSG00000109738	protein_coding	4	157076125	157172090	1	GLRB	glycine receptor beta [Source:HGNC Symbol;Acc:HGNC:4329]
ENSG00000109743.11	720.662	1.40809	0.390535	3.11085e-05	0.000405517	TRUE	683	ENSG00000109743	protein_coding	4	15703065	15738313	1	BST1	bone marrow stromal cell antigen 1 [Source:HGNC Symbol;Acc:HGNC:1118]
ENSG00000109805.10	642.392	-1.16441	0.534715	0.00308397	0.0155935	TRUE	64151	ENSG00000109805	protein_coding	4	17810979	17844865	1	NCAPG	non-SMC condensin I complex subunit G [Source:HGNC Symbol;Acc:HGNC:24304]
ENSG00000109846.9	7642.22	-1.07066	0.404875	0.00112519	0.00705926	TRUE	1410	ENSG00000109846	protein_coding	11	111908564	111923722	-1	CRYAB	crystallin alpha B [Source:HGNC Symbol;Acc:HGNC:2389]
ENSG00000110080.20	544.454	-1.08154	0.18723	1.33895e-09	9.84574e-08	TRUE	6484	ENSG00000110080	protein_coding	11	126355640	126440344	1	ST3GAL4	ST3 beta-galactoside alpha-2,3-sialyltransferase 4 [Source:HGNC Symbol;Acc:HGNC:10864]
ENSG00000110318.15	226.775	1.57121	0.248937	2.44075e-11	3.32559e-09	TRUE	57562	ENSG00000110318	protein_coding	11	101915010	102001062	1	CEP126	centrosomal protein 126 [Source:HGNC Symbol;Acc:HGNC:29264]
ENSG00000110328.6	34.2887	-1.47717	0.786208	0.00364828	0.0177607	TRUE	374378	ENSG00000110328	protein_coding	11	11270877	11622005	-1	GALNT18	polypeptide N-acetylgalactosaminyltransferase 18 [Source:HGNC Symbol;Acc:HGNC:30488]
ENSG00000110697.13	387.726	-1.09322	0.257322	3.5015e-06	6.97379e-05	TRUE	9600	ENSG00000110697	protein_coding	11	67491768	67506263	-1	PITPNM1	phosphatidylinositol transfer protein membrane associated 1 [Source:HGNC Symbol;Acc:HGNC:9003]
ENSG00000110717.13	496.747	-1.37463	0.311732	1.20324e-06	2.95188e-05	TRUE	4728	ENSG00000110717	protein_coding	11	68030617	68036644	1	NDUFS8	NADH:ubiquinone oxidoreductase core subunit S8 [Source:HGNC Symbol;Acc:HGNC:7715]
ENSG00000110719.10	931.312	-1.06083	0.446736	0.00232215	0.0124972	TRUE	10312	ENSG00000110719	protein_coding	11	68039025	68050895	1	TCIRG1	T cell immune regulator 1, ATPase H+ transporting V0 subunit a3 [Source:HGNC Symbol;Acc:HGNC:11647]
ENSG00000110723.12	67.9623	1.41546	0.777116	0.00387315	0.0186632	TRUE	23086	ENSG00000110723	protein_coding	11	108505435	108593768	-1	EXPH5	exophilin 5 [Source:HGNC Symbol;Acc:HGNC:30578]
ENSG00000110852.5	390.56	3.11617	0.614213	1.72308e-08	8.75256e-07	TRUE	9976	ENSG00000110852	protein_coding	12	9852369	9869386	-1	CLEC2B	C-type lectin domain family 2 member B [Source:HGNC Symbol;Acc:HGNC:2053]
ENSG00000110900.16	103.296	-1.08047	0.585369	0.0069559	0.0295199	TRUE	441631	ENSG00000110900	protein_coding	12	30926428	30996602	1	TSPAN11	tetraspanin 11 [Source:HGNC Symbol;Acc:HGNC:30795]
ENSG00000111057.11	223.292	-3.50337	0.628114	1.53398e-09	1.10346e-07	TRUE	3875	ENSG00000111057	protein_coding	12	52948871	52952906	1	KRT18	keratin 18 [Source:HGNC Symbol;Acc:HGNC:6430]
ENSG00000111058.8	139.864	1.49175	0.368392	4.73024e-06	8.88644e-05	TRUE	79611	ENSG00000111058	protein_coding	12	80936414	81261210	1	ACSS3	acyl-CoA synthetase short chain family member 3 [Source:HGNC Symbol;Acc:HGNC:24723]
ENSG00000111087.10	40.9528	-1.80698	0.50758	2.54344e-05	0.00034513	TRUE	2735	ENSG00000111087	protein_coding	12	57459785	57472268	1	GLI1	GLI family zinc finger 1 [Source:HGNC Symbol;Acc:HGNC:4317]
ENSG00000111206.13	1363.73	-1.40059	0.446936	0.000167721	0.00156147	TRUE	2305	ENSG00000111206	protein_coding	12	2857680	2877174	-1	FOXM1	forkhead box M1 [Source:HGNC Symbol;Acc:HGNC:3818]
ENSG00000111247.15	224.554	-1.48308	0.454071	0.000100797	0.00103906	TRUE	10635	ENSG00000111247	protein_coding	12	4538798	4560047	1	RAD51AP1	RAD51 associated protein 1 [Source:HGNC Symbol;Acc:HGNC:16956]
ENSG00000111269.3	942.515	1.15621	0.115846	2.94483e-24	1.13685e-20	TRUE	1389	ENSG00000111269	protein_coding	12	12611827	12645108	1	CREBL2	cAMP responsive element binding protein like 2 [Source:HGNC Symbol;Acc:HGNC:2350]
ENSG00000111305.19	10.9431	1.39026	0.754795	0.00419799	0.0198607	TRUE	83445	ENSG00000111305	protein_coding	12	13083532	13103683	-1	GSG1	germ cell associated 1 [Source:HGNC Symbol;Acc:HGNC:19716]
ENSG00000111335.14	72.8036	1.04281	0.652438	0.0102916	0.0398662	TRUE	4939	ENSG00000111335	protein_coding	12	112978395	113011723	1	OAS2	2'-5'-oligoadenylate synthetase 2 [Source:HGNC Symbol;Acc:HGNC:8087]
ENSG00000111424.12	546.194	1.21413	0.257075	3.11085e-07	9.73739e-06	TRUE	7421	ENSG00000111424	protein_coding	12	47841537	47943048	-1	VDR	vitamin D receptor [Source:HGNC Symbol;Acc:HGNC:12679]
ENSG00000111445.14	259.208	-1.18171	0.353506	0.000109866	0.00111468	TRUE	5985	ENSG00000111445	protein_coding	12	118013588	118033130	1	RFC5	replication factor C subunit 5 [Source:HGNC Symbol;Acc:HGNC:9973]
ENSG00000111452.13	594.566	2.62381	0.760783	2.40742e-05	0.000330349	TRUE	283383	ENSG00000111452	protein_coding	12	130953907	131141469	1	ADGRD1	adhesion G protein-coupled receptor D1 [Source:HGNC Symbol;Acc:HGNC:19893]
ENSG00000111602.12	652.154	-1.24545	0.419265	0.000340849	0.00275185	TRUE	8914	ENSG00000111602	protein_coding	12	56416363	56449426	-1	TIMELESS	timeless circadian regulator [Source:HGNC Symbol;Acc:HGNC:11813]
ENSG00000111664.11	62.9757	-1.39584	0.348176	6.67746e-06	0.000117979	TRUE	2784	ENSG00000111664	protein_coding	12	6839954	6847393	1	GNB3	G protein subunit beta 3 [Source:HGNC Symbol;Acc:HGNC:4400]
ENSG00000111665.12	465.965	-2.31691	0.548343	1.53283e-06	3.56806e-05	TRUE	83461	ENSG00000111665	protein_coding	12	6844793	6851292	-1	CDCA3	cell division cycle associated 3 [Source:HGNC Symbol;Acc:HGNC:14624]
ENSG00000111671.10	74.7109	-1.50976	0.285553	1.39746e-08	7.32336e-07	TRUE	105369632	ENSG00000111671	protein_coding	12	6870935	6889358	-1	SPSB2	splA/ryanodine receptor domain and SOCS box containing 2 [Source:HGNC Symbol;Acc:HGNC:29522]
ENSG00000111671.10	74.7109	-1.50976	0.285553	1.39746e-08	7.32336e-07	TRUE	84727	ENSG00000111671	protein_coding	12	6870935	6889358	-1	SPSB2	splA/ryanodine receptor domain and SOCS box containing 2 [Source:HGNC Symbol;Acc:HGNC:29522]
ENSG00000111678.11	710.893	-1.22738	0.433489	0.000529193	0.00387675	TRUE	113246	ENSG00000111678	protein_coding	12	6942978	6946003	1	C12orf57	chromosome 12 open reading frame 57 [Source:HGNC Symbol;Acc:HGNC:29521]
ENSG00000111788.10	43.2927	-1.58747	0.635284	0.000894892	0.00583405	TRUE	NA	ENSG00000111788	unprocessed_pseudogene	12	9277235	9313241	1		DEAD/H (Asp-Glu-Ala-Asp/His) box polypeptide like pseudogene
ENSG00000111801.16	294.024	1.20056	0.264803	7.48486e-07	2.02301e-05	TRUE	10384	ENSG00000111801	protein_coding	6	26440472	26453415	1	BTN3A3	butyrophilin subfamily 3 member A3 [Source:HGNC Symbol;Acc:HGNC:1140]
ENSG00000111816.8	21.3642	1.69288	0.46248	2.13525e-05	0.000299206	TRUE	2444	ENSG00000111816	protein_coding	6	115931149	116060891	-1	FRK	fyn related Src family tyrosine kinase [Source:HGNC Symbol;Acc:HGNC:3955]
ENSG00000111885.7	1118.49	2.06216	0.322042	1.03826e-11	1.60328e-09	TRUE	4121	ENSG00000111885	protein_coding	6	119177205	119349761	-1	MAN1A1	mannosidase alpha class 1A member 1 [Source:HGNC Symbol;Acc:HGNC:6821]
ENSG00000111911.7	339.816	1.24639	0.21013	3.82569e-10	3.48876e-08	TRUE	135114	ENSG00000111911	protein_coding	6	125956770	125980244	1	HINT3	histidine triad nucleotide binding protein 3 [Source:HGNC Symbol;Acc:HGNC:18468]
ENSG00000112029.10	302.378	-1.20868	0.391206	0.000246132	0.00212968	TRUE	26271	ENSG00000112029	protein_coding	6	152970519	152983579	-1	FBXO5	F-box protein 5 [Source:HGNC Symbol;Acc:HGNC:13584]
ENSG00000112039.5	108.533	-1.35601	0.306853	1.20766e-06	2.95188e-05	TRUE	2178	ENSG00000112039	protein_coding	6	35452338	35467102	1	FANCE	FA complementation group E [Source:HGNC Symbol;Acc:HGNC:3586]
ENSG00000112118.20	1217.83	-1.02623	0.363219	0.000741415	0.00505695	TRUE	4172	ENSG00000112118	protein_coding	6	52264014	52284881	-1	MCM3	minichromosome maintenance complex component 3 [Source:HGNC Symbol;Acc:HGNC:6945]
ENSG00000112137.19	56.4407	1.95144	0.493908	4.84825e-06	9.05646e-05	TRUE	221692	ENSG00000112137	protein_coding	6	12716312	13290446	1	PHACTR1	phosphatase and actin regulator 1 [Source:HGNC Symbol;Acc:HGNC:20990]
ENSG00000112208.11	2107.53	1.09585	0.255936	2.81854e-06	5.86576e-05	TRUE	9532	ENSG00000112208	protein_coding	6	57172326	57189833	1	BAG2	BAG cochaperone 2 [Source:HGNC Symbol;Acc:HGNC:938]
ENSG00000112297.18	249.755	1.08585	0.760367	0.0113894	0.0430713	TRUE	202	ENSG00000112297	protein_coding	6	106360717	106572017	1	CRYBG1	crystallin beta-gamma domain containing 1 [Source:HGNC Symbol;Acc:HGNC:356]
ENSG00000112299.8	2.61983	1.0354	4.02391	0.0117895	0.0442665	TRUE	8876	ENSG00000112299	protein_coding	6	132680849	132714055	-1	VNN1	vanin 1 [Source:HGNC Symbol;Acc:HGNC:12705]
ENSG00000112312.10	295.008	-1.34765	0.391679	6.32381e-05	0.000716963	TRUE	51053	ENSG00000112312	protein_coding	6	24774931	24786099	1	GMNN	geminin DNA replication inhibitor [Source:HGNC Symbol;Acc:HGNC:17493]
ENSG00000112378.12	1653.85	1.03288	0.295294	7.56275e-05	0.000824357	TRUE	64065	ENSG00000112378	protein_coding	6	138088505	138107419	-1	PERP	p53 apoptosis effector related to PMP22 [Source:HGNC Symbol;Acc:HGNC:17637]
ENSG00000112406.5	556.868	1.4173	0.172429	2.28114e-17	1.22879e-14	TRUE	51696	ENSG00000112406	protein_coding	6	139135080	139180802	1	HECA	hdc homolog, cell cycle regulator [Source:HGNC Symbol;Acc:HGNC:21041]
ENSG00000112541.19	33.2817	-3.49567	0.789659	3.03358e-07	9.54713e-06	TRUE	90632	ENSG00000112541	protein_coding	6	165327287	165988117	-1	PDE10A	phosphodiesterase 10A [Source:HGNC Symbol;Acc:HGNC:8772]
ENSG00000112541.19	33.2817	-3.49567	0.789659	3.03358e-07	9.54713e-06	TRUE	10846	ENSG00000112541	protein_coding	6	165327287	165988117	-1	PDE10A	phosphodiesterase 10A [Source:HGNC Symbol;Acc:HGNC:8772]
ENSG00000112559.15	7.50031	-1.89763	0.720694	0.000540109	0.0039453	TRUE	4188	ENSG00000112559	protein_coding	6	41636882	41654244	1	MDFI	MyoD family inhibitor [Source:HGNC Symbol;Acc:HGNC:6967]
ENSG00000112576.13	870.215	-1.14562	0.244012	4.09087e-07	1.22583e-05	TRUE	896	ENSG00000112576	protein_coding	6	41934934	42050357	-1	CCND3	cyclin D3 [Source:HGNC Symbol;Acc:HGNC:1585]
ENSG00000112667.13	120.49	-1.26719	0.301613	3.58136e-06	7.07947e-05	TRUE	10591	ENSG00000112667	protein_coding	6	43225629	43229481	-1	DNPH1	2'-deoxynucleoside 5'-phosphate N-hydrolase 1 [Source:HGNC Symbol;Acc:HGNC:21218]
ENSG00000112706.12	3.20124	1.6394	1.22726	0.00795946	0.0328097	TRUE	3617	ENSG00000112706	protein_coding	6	75921114	76072678	-1	IMPG1	interphotoreceptor matrix proteoglycan 1 [Source:HGNC Symbol;Acc:HGNC:6055]
ENSG00000112742.10	331.599	-1.55303	0.582538	0.000584946	0.00420114	TRUE	7272	ENSG00000112742	protein_coding	6	80003887	80042527	1	TTK	TTK protein kinase [Source:HGNC Symbol;Acc:HGNC:12401]
ENSG00000112769.20	10127	1.44042	0.249731	1.20552e-09	9.06607e-08	TRUE	3910	ENSG00000112769	protein_coding	6	112107931	112254939	-1	LAMA4	laminin subunit alpha 4 [Source:HGNC Symbol;Acc:HGNC:6484]
ENSG00000112787.14	177.129	-1.19382	0.444534	0.000836837	0.00553029	TRUE	57666	ENSG00000112787	protein_coding	12	132489551	132585188	1	FBRSL1	fibrosin like 1 [Source:HGNC Symbol;Acc:HGNC:29308]
ENSG00000112796.10	43.6574	7.43165	1.34568	2.25618e-10	2.2593e-08	TRUE	59084	ENSG00000112796	protein_coding	6	46159185	46170980	-1	ENPP5	ectonucleotide pyrophosphatase/phosphodiesterase family member 5 [Source:HGNC Symbol;Acc:HGNC:13717]
ENSG00000112877.8	33.4112	-1.84848	0.451089	3.5984e-06	7.10568e-05	TRUE	55722	ENSG00000112877	protein_coding	5	612340	667168	1	CEP72	centrosomal protein 72 [Source:HGNC Symbol;Acc:HGNC:25547]
ENSG00000112902.12	2873.94	1.26789	0.4305	0.000360632	0.00287285	TRUE	9037	ENSG00000112902	protein_coding	5	9035033	9546075	-1	SEMA5A	semaphorin 5A [Source:HGNC Symbol;Acc:HGNC:10736]
ENSG00000112984.12	1166.35	-1.87782	0.583071	8.21135e-05	0.00088137	TRUE	10112	ENSG00000112984	protein_coding	5	138178719	138187723	1	KIF20A	kinesin family member 20A [Source:HGNC Symbol;Acc:HGNC:9787]
ENSG00000113296.14	56.0649	2.70555	1.00543	0.000215409	0.00191389	TRUE	7060	ENSG00000113296	protein_coding	5	79991311	80083287	1	THBS4	thrombospondin 4 [Source:HGNC Symbol;Acc:HGNC:11788]
ENSG00000113361.13	132.569	-1.5683	1.07599	0.00605986	0.0265189	TRUE	1004	ENSG00000113361	protein_coding	5	31193686	31329146	1	CDH6	cadherin 6 [Source:HGNC Symbol;Acc:HGNC:1765]
ENSG00000113368.12	645.049	-1.64521	0.517289	0.00011542	0.00115785	TRUE	4001	ENSG00000113368	protein_coding	5	126776623	126837020	1	LMNB1	lamin B1 [Source:HGNC Symbol;Acc:HGNC:6637]
ENSG00000113369.9	1108.11	1.33105	0.303077	1.2562e-06	3.04366e-05	TRUE	57561	ENSG00000113369	protein_coding	5	91368631	91383317	-1	ARRDC3	arrestin domain containing 3 [Source:HGNC Symbol;Acc:HGNC:29263]
ENSG00000113389.16	3795.03	-1.65315	0.512813	9.82662e-05	0.0010178	TRUE	4883	ENSG00000113389	protein_coding	5	32689070	32791724	1	NPR3	natriuretic peptide receptor 3 [Source:HGNC Symbol;Acc:HGNC:7945]
ENSG00000113448.20	99.4552	-1.31916	0.450472	0.000358757	0.00286169	TRUE	5144	ENSG00000113448	protein_coding	5	58969038	60522120	-1	PDE4D	phosphodiesterase 4D [Source:HGNC Symbol;Acc:HGNC:8783]
ENSG00000113494.17	182.031	1.91032	0.453167	1.65791e-06	3.78783e-05	TRUE	5618	ENSG00000113494	protein_coding	5	35048756	35230487	-1	PRLR	prolactin receptor [Source:HGNC Symbol;Acc:HGNC:9446]
ENSG00000113721.14	6203.25	1.13865	0.242978	5.7115e-07	1.60553e-05	TRUE	5159	ENSG00000113721	protein_coding	5	150113839	150155872	-1	PDGFRB	platelet derived growth factor receptor beta [Source:HGNC Symbol;Acc:HGNC:8804]
ENSG00000113758.14	3002.46	-1.20577	0.249261	1.97412e-07	6.60788e-06	TRUE	1627	ENSG00000113758	protein_coding	5	177456608	177474401	-1	DBN1	drebrin 1 [Source:HGNC Symbol;Acc:HGNC:2695]
ENSG00000113805.9	1393.79	1.64627	0.357001	3.6311e-07	1.11024e-05	TRUE	5067	ENSG00000113805	protein_coding	3	74262568	74614659	-1	CNTN3	contactin 3 [Source:HGNC Symbol;Acc:HGNC:2173]
ENSG00000114115.10	10.0138	-2.65889	1.59328	0.0019746	0.0109709	TRUE	5947	ENSG00000114115	protein_coding	3	139517434	139539829	-1	RBP1	retinol binding protein 1 [Source:HGNC Symbol;Acc:HGNC:9919]
ENSG00000114120.14	1107.4	1.09088	0.146955	1.89616e-14	5.63088e-12	TRUE	55186	ENSG00000114120	protein_coding	3	140941830	140980995	1	SLC25A36	solute carrier family 25 member 36 [Source:HGNC Symbol;Acc:HGNC:25554]
ENSG00000114251.15	2926.44	1.09359	0.418808	0.00125231	0.00769625	TRUE	7474	ENSG00000114251	protein_coding	3	55465715	55490539	-1	WNT5A	Wnt family member 5A [Source:HGNC Symbol;Acc:HGNC:12784]
ENSG00000114270.18	1925.95	-1.79222	0.500378	2.55018e-05	0.000345842	TRUE	1294	ENSG00000114270	protein_coding	3	48564073	48595329	-1	COL7A1	collagen type VII alpha 1 chain [Source:HGNC Symbol;Acc:HGNC:2214]
ENSG00000114378.17	14.7469	-1.69231	0.675132	0.000788333	0.00527598	TRUE	3373	ENSG00000114378	protein_coding	3	50299890	50312381	-1	HYAL1	hyaluronidase 1 [Source:HGNC Symbol;Acc:HGNC:5320]
ENSG00000114529.13	114.987	-1.51925	0.250851	1.41631e-10	1.53299e-08	TRUE	79669	ENSG00000114529	protein_coding	3	112086335	112131004	1	C3orf52	chromosome 3 open reading frame 52 [Source:HGNC Symbol;Acc:HGNC:26255]
ENSG00000114698.15	605.136	2.17153	0.348115	2.94774e-11	3.89944e-09	TRUE	57088	ENSG00000114698	protein_coding	3	146192335	146251179	-1	PLSCR4	phospholipid scramblase 4 [Source:HGNC Symbol;Acc:HGNC:16497]
ENSG00000115084.15	1711.59	1.05417	0.162659	1.73013e-11	2.53444e-09	TRUE	80255	ENSG00000115084	protein_coding	2	113705011	113756693	-1	SLC35F5	solute carrier family 35 member F5 [Source:HGNC Symbol;Acc:HGNC:23617]
ENSG00000115138.11	5.65247	-1.4564	0.987028	0.00823493	0.0336294	TRUE	5443	ENSG00000115138	protein_coding	2	25160853	25168903	-1	POMC	proopiomelanocortin [Source:HGNC Symbol;Acc:HGNC:9201]
ENSG00000115163.15	179.565	-2.04312	0.626744	7.02706e-05	0.000773979	TRUE	1058	ENSG00000115163	protein_coding	2	26764289	26801067	1	CENPA	centromere protein A [Source:HGNC Symbol;Acc:HGNC:1851]
ENSG00000115221.12	3.8255	-1.11091	3.80667	0.00756821	0.0315236	TRUE	3694	ENSG00000115221	protein_coding	2	160099667	160200313	-1	ITGB6	integrin subunit beta 6 [Source:HGNC Symbol;Acc:HGNC:6161]
ENSG00000115252.18	133.772	4.24145	0.527343	1.76067e-17	1.07322e-14	TRUE	5136	ENSG00000115252	protein_coding	2	182140036	182523192	-1	PDE1A	phosphodiesterase 1A [Source:HGNC Symbol;Acc:HGNC:8774]
ENSG00000115267.9	31.8094	2.68188	0.716685	8.0814e-06	0.000136734	TRUE	64135	ENSG00000115267	protein_coding	2	162267074	162318684	-1	IFIH1	interferon induced with helicase C domain 1 [Source:HGNC Symbol;Acc:HGNC:18873]
ENSG00000115268.10	2545.6	-1.08916	0.320337	9.36194e-05	0.000978528	TRUE	6209	ENSG00000115268	protein_coding	19	1438358	1440495	1	RPS15	ribosomal protein S15 [Source:HGNC Symbol;Acc:HGNC:10388]
ENSG00000115271.11	8.60912	2.23071	0.846043	0.000319909	0.00261193	TRUE	25801	ENSG00000115271	protein_coding	2	162318840	162371595	1	GCA	grancalcin [Source:HGNC Symbol;Acc:HGNC:15990]
ENSG00000115286.21	203.06	-2.19946	0.458701	1.19268e-07	4.31655e-06	TRUE	374291	ENSG00000115286	protein_coding	19	1383527	1395589	1	NDUFS7	NADH:ubiquinone oxidoreductase core subunit S7 [Source:HGNC Symbol;Acc:HGNC:7714]
ENSG00000115295.21	1026.72	1.66607	0.27823	1.84492e-10	1.91632e-08	TRUE	79745	ENSG00000115295	protein_coding	2	29097705	29199777	1	CLIP4	CAP-Gly domain containing linker protein family member 4 [Source:HGNC Symbol;Acc:HGNC:26108]
ENSG00000115380.20	6022.46	2.04864	1.09167	0.00201423	0.0111536	TRUE	2202	ENSG00000115380	protein_coding	2	55865967	55924139	-1	EFEMP1	EGF containing fibulin extracellular matrix protein 1 [Source:HGNC Symbol;Acc:HGNC:3218]
ENSG00000115415.20	5653.43	1.57015	0.288225	6.58741e-09	3.76751e-07	TRUE	6772	ENSG00000115415	protein_coding	2	190908460	191020960	-1	STAT1	signal transducer and activator of transcription 1 [Source:HGNC Symbol;Acc:HGNC:11362]
ENSG00000115457.10	93.182	2.3751	0.826436	0.000159745	0.00150536	TRUE	3485	ENSG00000115457	protein_coding	2	216632828	216664436	1	IGFBP2	insulin like growth factor binding protein 2 [Source:HGNC Symbol;Acc:HGNC:5471]
ENSG00000115468.13	51.3395	-2.39407	1.03858	0.000827708	0.00548226	TRUE	80303	ENSG00000115468	protein_coding	2	232606057	232682776	1	EFHD1	EF-hand domain family member D1 [Source:HGNC Symbol;Acc:HGNC:29556]
ENSG00000115540.15	763.868	1.01144	0.207833	2.04907e-07	6.82915e-06	TRUE	25843	ENSG00000115540	protein_coding	2	197515571	197553699	1	MOB4	MOB family member 4, phocein [Source:HGNC Symbol;Acc:HGNC:17261]
ENSG00000115687.14	85.8753	-1.39967	0.374607	2.03035e-05	0.000286239	TRUE	23178	ENSG00000115687	protein_coding	2	241106099	241150264	-1	PASK	PAS domain containing serine/threonine kinase [Source:HGNC Symbol;Acc:HGNC:17270]
ENSG00000115718.18	2.83221	-2.03824	1.16085	0.00296496	0.0150972	TRUE	5624	ENSG00000115718	protein_coding	2	127418427	127429242	1	PROC	protein C, inactivator of coagulation factors Va and VIIIa [Source:HGNC Symbol;Acc:HGNC:9451]
ENSG00000115756.13	259.773	-1.04246	0.319891	0.000182661	0.00166771	TRUE	3241	ENSG00000115756	protein_coding	2	10302889	10427617	1	HPCAL1	hippocalcin like 1 [Source:HGNC Symbol;Acc:HGNC:5145]
ENSG00000115841.21	150.628	1.11333	0.226176	1.27663e-07	4.55634e-06	TRUE	151393	ENSG00000115841	protein_coding	2	37923187	38067142	1	RMDN2	regulator of microtubule dynamics 2 [Source:HGNC Symbol;Acc:HGNC:26567]
ENSG00000115844.11	61.2559	-2.36176	0.693165	3.33961e-05	0.000427757	TRUE	1746	ENSG00000115844	protein_coding	2	172099438	172102900	-1	DLX2	distal-less homeobox 2 [Source:HGNC Symbol;Acc:HGNC:2915]
ENSG00000115884.11	1034.85	-1.28575	0.398454	0.000141387	0.00135721	TRUE	6382	ENSG00000115884	protein_coding	2	20200797	20225433	-1	SDC1	syndecan 1 [Source:HGNC Symbol;Acc:HGNC:10658]
ENSG00000116106.12	192.196	1.20303	0.437867	0.000638869	0.00450081	TRUE	2043	ENSG00000116106	protein_coding	2	221418027	221574202	-1	EPHA4	EPH receptor A4 [Source:HGNC Symbol;Acc:HGNC:3388]
ENSG00000116117.19	548.095	2.2266	0.354147	1.97561e-11	2.75957e-09	TRUE	117583	ENSG00000116117	protein_coding	2	204545475	205620162	1	PARD3B	par-3 family cell polarity regulator beta [Source:HGNC Symbol;Acc:HGNC:14446]
ENSG00000116194.13	75.1402	1.1831	0.616312	0.00456357	0.0211766	TRUE	9068	ENSG00000116194	protein_coding	1	178849535	178871077	-1	ANGPTL1	angiopoietin like 1 [Source:HGNC Symbol;Acc:HGNC:489]
ENSG00000116254.18	4.80795	-1.59851	1.17383	0.00606664	0.0265335	TRUE	26038	ENSG00000116254	protein_coding	1	6101787	6180321	-1	CHD5	chromodomain helicase DNA binding protein 5 [Source:HGNC Symbol;Acc:HGNC:16816]
ENSG00000116396.15	415.352	-1.0867	0.421044	0.00132364	0.00802815	TRUE	3749	ENSG00000116396	protein_coding	1	110210314	110283100	1	KCNC4	potassium voltage-gated channel subfamily C member 4 [Source:HGNC Symbol;Acc:HGNC:6236]
ENSG00000116652.6	8.43036	1.62535	0.57808	0.000374352	0.00295842	TRUE	NA	ENSG00000116652	lncRNA	1	63547082	63550636	1	DLEU2L	deleted in lymphocytic leukemia 2 like [Source:HGNC Symbol;Acc:HGNC:13225]
ENSG00000116661.11	2.40751	-1.84128	1.0994	0.00516342	0.0233823	TRUE	26232	ENSG00000116661	protein_coding	1	11637018	11655785	-1	FBXO2	F-box protein 2 [Source:HGNC Symbol;Acc:HGNC:13581]
ENSG00000116670.15	312.084	-1.43651	0.230952	6.16123e-11	7.35632e-09	TRUE	10459	ENSG00000116670	protein_coding	1	11674480	11691650	-1	MAD2L2	mitotic arrest deficient 2 like 2 [Source:HGNC Symbol;Acc:HGNC:6764]
ENSG00000116678.20	293.498	1.18711	0.274518	2.02773e-06	4.43096e-05	TRUE	3953	ENSG00000116678	protein_coding	1	65420652	65641559	1	LEPR	leptin receptor [Source:HGNC Symbol;Acc:HGNC:6554]
ENSG00000116691.11	97.6889	-1.47208	0.36462	5.75883e-06	0.000104752	TRUE	60672	ENSG00000116691	protein_coding	1	12019466	12032045	1	MIIP	migration and invasion inhibitory protein [Source:HGNC Symbol;Acc:HGNC:25715]
ENSG00000116701.15	27.4344	-1.09232	0.738398	0.0119065	0.0445543	TRUE	4688	ENSG00000116701	protein_coding	1	183555562	183590876	-1	NCF2	neutrophil cytosolic factor 2 [Source:HGNC Symbol;Acc:HGNC:7661]
ENSG00000116729.14	477.439	-1.03294	0.540036	0.00675227	0.0288726	TRUE	79971	ENSG00000116729	protein_coding	1	68098473	68233120	-1	WLS	Wnt ligand secretion mediator [Source:HGNC Symbol;Acc:HGNC:30238]
ENSG00000116741.8	42.0286	-1.2843	0.408194	0.000177056	0.00162809	TRUE	5997	ENSG00000116741	protein_coding	1	192809039	192812275	1	RGS2	regulator of G protein signaling 2 [Source:HGNC Symbol;Acc:HGNC:9998]
ENSG00000116809.12	247.04	-1.07508	0.269093	1.09837e-05	0.000175217	TRUE	7709	ENSG00000116809	protein_coding	1	15941869	15976132	-1	ZBTB17	zinc finger and BTB domain containing 17 [Source:HGNC Symbol;Acc:HGNC:12936]
ENSG00000116833.14	26.7623	-3.78763	0.894416	1.18317e-06	2.93397e-05	TRUE	2494	ENSG00000116833	protein_coding	1	200027614	200177420	1	NR5A2	nuclear receptor subfamily 5 group A member 2 [Source:HGNC Symbol;Acc:HGNC:7984]
ENSG00000116991.12	155.763	1.36848	0.581262	0.00139562	0.00837049	TRUE	57568	ENSG00000116991	protein_coding	1	232397965	232630571	-1	SIPA1L2	signal induced proliferation associated 1 like 2 [Source:HGNC Symbol;Acc:HGNC:23800]
ENSG00000117151.13	622.664	1.01958	0.208665	1.8113e-07	6.10701e-06	TRUE	1486	ENSG00000117151	protein_coding	1	84549611	84574480	-1	CTBS	chitobiase [Source:HGNC Symbol;Acc:HGNC:2496]
ENSG00000117152.14	1308.44	-1.12411	0.60607	0.00623625	0.0271064	TRUE	5999	ENSG00000117152	protein_coding	1	163068775	163076802	1	RGS4	regulator of G protein signaling 4 [Source:HGNC Symbol;Acc:HGNC:10000]
ENSG00000117155.17	1191.12	-1.26635	0.631533	0.00382905	0.0184921	TRUE	117178	ENSG00000117155	protein_coding	1	84643706	84690803	-1	SSX2IP	SSX family member 2 interacting protein [Source:HGNC Symbol;Acc:HGNC:16509]
ENSG00000117280.13	432.985	1.16643	0.285968	5.95585e-06	0.000107526	TRUE	8934	ENSG00000117280	protein_coding	1	205767986	205775482	-1	RAB29	RAB29, member RAS oncogene family [Source:HGNC Symbol;Acc:HGNC:9789]
ENSG00000117308.15	255.501	-1.55645	0.280274	3.05559e-09	1.96188e-07	TRUE	2582	ENSG00000117308	protein_coding	1	23795599	23800781	-1	GALE	UDP-galactose-4-epimerase [Source:HGNC Symbol;Acc:HGNC:4116]
ENSG00000117318.9	4073.36	-2.18236	0.39055	1.69058e-09	1.19752e-07	TRUE	3399	ENSG00000117318	protein_coding	1	23557926	23559501	-1	ID3	inhibitor of DNA binding 3, HLH protein [Source:HGNC Symbol;Acc:HGNC:5362]
ENSG00000117399.14	780.034	-2.35018	0.536144	7.55734e-07	2.03597e-05	TRUE	991	ENSG00000117399	protein_coding	1	43358981	43363203	1	CDC20	cell division cycle 20 [Source:HGNC Symbol;Acc:HGNC:1723]
ENSG00000117533.15	564.113	1.07431	0.264671	7.59831e-06	0.000130081	TRUE	8674	ENSG00000117533	protein_coding	1	171700160	171742074	-1	VAMP4	vesicle associated membrane protein 4 [Source:HGNC Symbol;Acc:HGNC:12645]
ENSG00000117595.12	197.697	-2.96813	1.1824	0.000413669	0.00320141	TRUE	3664	ENSG00000117595	protein_coding	1	209785617	209806175	-1	IRF6	interferon regulatory factor 6 [Source:HGNC Symbol;Acc:HGNC:6121]
ENSG00000117620.15	598.008	1.64865	0.215416	1.74527e-15	6.52027e-13	TRUE	23443	ENSG00000117620	protein_coding	1	99969351	100035634	1	SLC35A3	solute carrier family 35 member A3 [Source:HGNC Symbol;Acc:HGNC:11023]
ENSG00000117632.23	3175.33	-1.53302	0.419075	2.328e-05	0.00032134	TRUE	3925	ENSG00000117632	protein_coding	1	25884181	25906991	-1	STMN1	stathmin 1 [Source:HGNC Symbol;Acc:HGNC:6510]
ENSG00000117643.15	93.7	1.91921	0.760223	0.000527115	0.00386868	TRUE	57134	ENSG00000117643	protein_coding	1	25616791	25786206	1	MAN1C1	mannosidase alpha class 1C member 1 [Source:HGNC Symbol;Acc:HGNC:19080]
ENSG00000117650.13	310.377	-2.44956	0.625183	5.27703e-06	9.70095e-05	TRUE	4751	ENSG00000117650	protein_coding	1	211658657	211675630	-1	NEK2	NIMA related kinase 2 [Source:HGNC Symbol;Acc:HGNC:7745]
ENSG00000117676.14	28.1414	-1.08104	0.428234	0.00145544	0.00863091	TRUE	6195	ENSG00000117676	protein_coding	1	26529761	26575030	1	RPS6KA1	ribosomal protein S6 kinase A1 [Source:HGNC Symbol;Acc:HGNC:10430]
ENSG00000117724.14	2369.63	-1.76389	0.57995	0.000163062	0.00152791	TRUE	1063	ENSG00000117724	protein_coding	1	214603195	214664571	1	CENPF	centromere protein F [Source:HGNC Symbol;Acc:HGNC:1857]
ENSG00000118193.12	376.627	-1.6844	0.571413	0.000233003	0.00203586	TRUE	9928	ENSG00000118193	protein_coding	1	200551497	200620751	-1	KIF14	kinesin family member 14 [Source:HGNC Symbol;Acc:HGNC:19181]
ENSG00000118257.17	1478.34	-1.12819	0.474919	0.00208631	0.0114488	TRUE	8828	ENSG00000118257	protein_coding	2	205681990	205798133	1	NRP2	neuropilin 2 [Source:HGNC Symbol;Acc:HGNC:8005]
ENSG00000118473.23	445.171	1.46436	0.505453	0.000304327	0.00251485	TRUE	84251	ENSG00000118473	protein_coding	1	66533267	66751139	1	SGIP1	SH3GL interacting endocytic adaptor 1 [Source:HGNC Symbol;Acc:HGNC:25412]
ENSG00000118496.5	605.105	1.0243	0.169968	3.04793e-10	2.84674e-08	TRUE	84085	ENSG00000118496	protein_coding	6	145793502	145814795	-1	FBXO30	F-box protein 30 [Source:HGNC Symbol;Acc:HGNC:15600]
ENSG00000118557.16	9.50477	-1.70689	0.950858	0.00333806	0.0165389	TRUE	83449	ENSG00000118557	protein_coding	16	72112157	72176878	-1	PMFBP1	polyamine modulated factor 1 binding protein 1 [Source:HGNC Symbol;Acc:HGNC:17728]
ENSG00000118596.12	653.531	1.41208	0.287896	9.36777e-08	3.55714e-06	TRUE	9194	ENSG00000118596	protein_coding	12	59596029	59789855	1	SLC16A7	solute carrier family 16 member 7 [Source:HGNC Symbol;Acc:HGNC:10928]
ENSG00000118777.12	3.24551	-1.30618	1.03715	0.0107688	0.0412636	TRUE	9429	ENSG00000118777	protein_coding	4	88090150	88231628	-1	ABCG2	ATP binding cassette subfamily G member 2 (Junior blood group) [Source:HGNC Symbol;Acc:HGNC:74]
ENSG00000118849.10	10.0308	1.03944	0.496074	0.00431843	0.020302	TRUE	5918	ENSG00000118849	protein_coding	3	158696892	158732489	-1	RARRES1	retinoic acid receptor responder 1 [Source:HGNC Symbol;Acc:HGNC:9867]
ENSG00000118898.16	162.678	4.58467	1.07279	7.17261e-07	1.95228e-05	TRUE	5493	ENSG00000118898	protein_coding	16	4882507	4960741	-1	PPL	periplakin [Source:HGNC Symbol;Acc:HGNC:9273]
ENSG00000119048.8	937.718	1.02019	0.164121	9.66703e-11	1.09763e-08	TRUE	7320	ENSG00000119048	protein_coding	5	134371469	134392108	1	UBE2B	ubiquitin conjugating enzyme E2 B [Source:HGNC Symbol;Acc:HGNC:12473]
ENSG00000119318.13	6326.27	1.15442	0.225402	5.52853e-08	2.2786e-06	TRUE	5887	ENSG00000119318	protein_coding	9	107283137	107332192	1	RAD23B	RAD23 homolog B, nucleotide excision repair protein [Source:HGNC Symbol;Acc:HGNC:9813]
ENSG00000119333.12	461.137	-1.29753	0.342805	1.84617e-05	0.000265443	TRUE	89891	ENSG00000119333	protein_coding	9	128633653	128656847	-1	DYNC2I2	dynein 2 intermediate chain 2 [Source:HGNC Symbol;Acc:HGNC:28296]
ENSG00000119574.13	111.144	-1.12762	0.394383	0.000576789	0.00415818	TRUE	84878	ENSG00000119574	protein_coding	19	58513530	58538911	-1	ZBTB45	zinc finger and BTB domain containing 45 [Source:HGNC Symbol;Acc:HGNC:23715]
ENSG00000119729.12	2674.69	1.08128	0.196534	6.18494e-09	3.56372e-07	TRUE	23433	ENSG00000119729	protein_coding	2	46541806	46584688	1	RHOQ	ras homolog family member Q [Source:HGNC Symbol;Acc:HGNC:17736]
ENSG00000119878.6	301.933	1.0581	0.158365	4.13161e-12	7.14182e-10	TRUE	9419	ENSG00000119878	protein_coding	2	46616416	46630176	1	CRIPT	CXXC repeat containing interactor of PDZ3 domain [Source:HGNC Symbol;Acc:HGNC:14312]
ENSG00000119900.9	678.858	1.79332	0.290105	5.15352e-11	6.24979e-09	TRUE	79627	ENSG00000119900	protein_coding	6	71288811	71309059	1	OGFRL1	opioid growth factor receptor like 1 [Source:HGNC Symbol;Acc:HGNC:21378]
ENSG00000119950.21	590.136	1.28132	0.267686	2.09207e-07	6.96244e-06	TRUE	4601	ENSG00000119950	protein_coding	10	110207605	110287365	1	MXI1	MAX interactor 1, dimerization protein [Source:HGNC Symbol;Acc:HGNC:7534]
ENSG00000120262.10	22.3237	1.8209	0.728255	0.000630745	0.00445154	TRUE	80129	ENSG00000120262	protein_coding	6	151494017	151621193	1	CCDC170	coiled-coil domain containing 170 [Source:HGNC Symbol;Acc:HGNC:21177]
ENSG00000120278.16	20.7463	1.7008	0.720787	0.000969056	0.0062425	TRUE	57480	ENSG00000120278	protein_coding	6	150599883	150843665	1	PLEKHG1	pleckstrin homology and RhoGEF domain containing G1 [Source:HGNC Symbol;Acc:HGNC:20884]
ENSG00000120334.16	245.195	-1.0001	0.306578	0.000193042	0.00174734	TRUE	91687	ENSG00000120334	protein_coding	1	173799550	173824883	-1	CENPL	centromere protein L [Source:HGNC Symbol;Acc:HGNC:17879]
ENSG00000120738.8	679.762	1.46311	0.536847	0.000501892	0.00372802	TRUE	1958	ENSG00000120738	protein_coding	5	138465479	138469303	1	EGR1	early growth response 1 [Source:HGNC Symbol;Acc:HGNC:3238]
ENSG00000121152.10	399.949	-2.375	0.54646	8.88162e-07	2.31933e-05	TRUE	23397	ENSG00000121152	protein_coding	2	96335766	96377091	1	NCAPH	non-SMC condensin I complex subunit H [Source:HGNC Symbol;Acc:HGNC:1112]
ENSG00000121211.8	34.1205	-1.30055	0.589474	0.00247026	0.0130696	TRUE	84057	ENSG00000121211	protein_coding	4	153344649	153415118	1	MND1	meiotic nuclear divisions 1 [Source:HGNC Symbol;Acc:HGNC:24839]
ENSG00000121410.12	84.7849	-1.97827	0.439929	5.15226e-07	1.47335e-05	TRUE	1	ENSG00000121410	protein_coding	19	58345178	58353492	-1	A1BG	alpha-1-B glycoprotein [Source:HGNC Symbol;Acc:HGNC:5]
ENSG00000121621.7	303.344	-1.24273	0.409822	0.000282447	0.00237308	TRUE	81930	ENSG00000121621	protein_coding	11	28020619	28108156	-1	KIF18A	kinesin family member 18A [Source:HGNC Symbol;Acc:HGNC:29441]
ENSG00000121964.15	302.777	1.48964	0.192831	1.15187e-15	4.4468e-13	TRUE	79712	ENSG00000121964	protein_coding	2	143938068	144332568	-1	GTDC1	glycosyltransferase like domain containing 1 [Source:HGNC Symbol;Acc:HGNC:20887]
ENSG00000121989.15	307.953	1.2798	0.552717	0.00177626	0.0101115	TRUE	92	ENSG00000121989	protein_coding	2	147844517	147930826	1	ACVR2A	activin A receptor type 2A [Source:HGNC Symbol;Acc:HGNC:173]
ENSG00000122042.10	2397.16	1.16267	0.206298	2.51832e-09	1.65716e-07	TRUE	5412	ENSG00000122042	protein_coding	13	29764371	29850617	-1	UBL3	ubiquitin like 3 [Source:HGNC Symbol;Acc:HGNC:12504]
ENSG00000122121.12	31.8151	3.69733	0.628792	1.91284e-10	1.97799e-08	TRUE	7512	ENSG00000122121	protein_coding	X	129738949	129769536	1	XPNPEP2	X-prolyl aminopeptidase 2 [Source:HGNC Symbol;Acc:HGNC:12823]
ENSG00000122176.12	1721.05	1.06113	0.596898	0.00800557	0.0329468	TRUE	2331	ENSG00000122176	protein_coding	1	203340628	203351758	-1	FMOD	fibromodulin [Source:HGNC Symbol;Acc:HGNC:3774]
ENSG00000122194.19	1.40005	4.35262	2.81431	0.00273052	0.0141809	TRUE	5340	ENSG00000122194	protein_coding	6	160702238	160754097	1	PLG	plasminogen [Source:HGNC Symbol;Acc:HGNC:9071]
ENSG00000122254.7	6.81913	-3.55796	1.4104	0.000311338	0.00255341	TRUE	9956	ENSG00000122254	protein_coding	16	22814162	22916338	1	HS3ST2	heparan sulfate-glucosamine 3-sulfotransferase 2 [Source:HGNC Symbol;Acc:HGNC:5195]
ENSG00000122335.17	344.181	1.13972	0.308758	3.0286e-05	0.000397459	TRUE	84947	ENSG00000122335	protein_coding	6	158109519	158168280	-1	SERAC1	serine active site containing 1 [Source:HGNC Symbol;Acc:HGNC:21061]
ENSG00000122378.14	8.96832	-2.78064	1.16445	0.000467564	0.00351972	TRUE	84293	ENSG00000122378	protein_coding	10	80407829	80437115	1	PRXL2A	peroxiredoxin like 2A [Source:HGNC Symbol;Acc:HGNC:28651]
ENSG00000122420.10	817.402	1.72915	0.491586	2.98151e-05	0.000392084	TRUE	5737	ENSG00000122420	protein_coding	1	78303884	78540701	1	PTGFR	prostaglandin F receptor [Source:HGNC Symbol;Acc:HGNC:9600]
ENSG00000122477.13	12.1696	1.24586	0.382159	0.000133261	0.00130097	TRUE	127495	ENSG00000122477	protein_coding	1	100148448	100178273	-1	LRRC39	leucine rich repeat containing 39 [Source:HGNC Symbol;Acc:HGNC:28228]
ENSG00000122547.11	89.7466	1.30751	0.747246	0.00501474	0.022834	TRUE	80820	ENSG00000122547	protein_coding	7	36153254	36301538	1	EEPD1	endonuclease/exonuclease/phosphatase family domain containing 1 [Source:HGNC Symbol;Acc:HGNC:22223]
ENSG00000122643.23	324.478	1.08599	0.1896	1.71491e-09	1.21105e-07	TRUE	51251	ENSG00000122643	protein_coding	7	33014130	33062796	-1	NT5C3A	5'-nucleotidase, cytosolic IIIA [Source:HGNC Symbol;Acc:HGNC:17820]
ENSG00000122824.11	4.22309	-1.88825	0.992512	0.0032891	0.0163558	TRUE	170685	ENSG00000122824	protein_coding	X	51332231	51337525	1	NUDT10	nudix hydrolase 10 [Source:HGNC Symbol;Acc:HGNC:17621]
ENSG00000122870.12	1846.41	1.62986	0.248577	5.54041e-12	9.29945e-10	TRUE	80114	ENSG00000122870	protein_coding	10	58512872	58831435	1	BICC1	BicC family RNA binding protein 1 [Source:HGNC Symbol;Acc:HGNC:19351]
ENSG00000122877.18	7.99858	1.98334	0.662616	0.000155762	0.00147403	TRUE	1959	ENSG00000122877	protein_coding	10	62811996	62819167	-1	EGR2	early growth response 2 [Source:HGNC Symbol;Acc:HGNC:3239]
ENSG00000122952.17	729.755	-2.06807	0.455017	3.97884e-07	1.20159e-05	TRUE	11130	ENSG00000122952	protein_coding	10	56357227	56361273	-1	ZWINT	ZW10 interacting kinetochore protein [Source:HGNC Symbol;Acc:HGNC:13195]
ENSG00000123119.12	32.4501	2.10568	0.448997	1.87742e-07	6.31156e-06	TRUE	64168	ENSG00000123119	protein_coding	8	90791741	90959393	1	NECAB1	N-terminal EF-hand calcium binding protein 1 [Source:HGNC Symbol;Acc:HGNC:20983]
ENSG00000123136.15	674.882	-1.44876	0.355633	4.86548e-06	9.06496e-05	TRUE	10212	ENSG00000123136	protein_coding	19	14408798	14419383	-1	DDX39A	DExD-box helicase 39A [Source:HGNC Symbol;Acc:HGNC:17821]
ENSG00000123159.16	1157.35	-1.05828	0.258117	7.3172e-06	0.000126014	TRUE	10755	ENSG00000123159	protein_coding	19	14477760	14496149	-1	GIPC1	GIPC PDZ domain containing family member 1 [Source:HGNC Symbol;Acc:HGNC:1226]
ENSG00000123219.13	211.879	-1.25782	0.507311	0.00133591	0.00807926	TRUE	64105	ENSG00000123219	protein_coding	5	65517766	65563168	-1	CENPK	centromere protein K [Source:HGNC Symbol;Acc:HGNC:29479]
ENSG00000123243.15	489.299	4.07948	0.798581	1.20099e-08	6.38042e-07	TRUE	80760	ENSG00000123243	protein_coding	10	7559270	7666998	-1	ITIH5	inter-alpha-trypsin inhibitor heavy chain 5 [Source:HGNC Symbol;Acc:HGNC:21449]
ENSG00000123364.5	8.57549	-6.21525	1.53356	3.65771e-08	1.60947e-06	TRUE	3229	ENSG00000123364	protein_coding	12	53938831	53946544	1	HOXC13	homeobox C13 [Source:HGNC Symbol;Acc:HGNC:5125]
ENSG00000123374.11	789.385	-1.1545	0.278692	5.2291e-06	9.65113e-05	TRUE	1017	ENSG00000123374	protein_coding	12	55966781	55972789	1	CDK2	cyclin dependent kinase 2 [Source:HGNC Symbol;Acc:HGNC:1771]
ENSG00000123388.4	69.9771	-8.79902	1.02196	2.15069e-26	1.66054e-22	TRUE	3227	ENSG00000123388	protein_coding	12	53973126	53977643	1	HOXC11	homeobox C11 [Source:HGNC Symbol;Acc:HGNC:5123]
ENSG00000123473.17	380.785	-1.42262	0.43934	0.000116264	0.00116481	TRUE	6491	ENSG00000123473	protein_coding	1	47250139	47314892	-1	STIL	STIL centriolar assembly protein [Source:HGNC Symbol;Acc:HGNC:10879]
ENSG00000123485.12	562.583	-1.95701	0.612146	8.95545e-05	0.000944086	TRUE	55355	ENSG00000123485	protein_coding	2	233833416	233854566	-1	HJURP	Holliday junction recognition protein [Source:HGNC Symbol;Acc:HGNC:25444]
ENSG00000123612.16	14.3461	2.56102	0.920278	0.000211864	0.0018911	TRUE	130399	ENSG00000123612	protein_coding	2	157526767	157628864	-1	ACVR1C	activin A receptor type 1C [Source:HGNC Symbol;Acc:HGNC:18123]
ENSG00000123689.6	14.4203	-5.90227	1.01822	1.0454e-10	1.16416e-08	TRUE	50486	ENSG00000123689	protein_coding	1	209675412	209676390	1	G0S2	G0/G1 switch 2 [Source:HGNC Symbol;Acc:HGNC:30229]
ENSG00000123700.5	79.0548	2.81652	0.496529	7.1145e-10	5.90426e-08	TRUE	3759	ENSG00000123700	protein_coding	17	70168673	70180044	1	KCNJ2	potassium inwardly rectifying channel subfamily J member 2 [Source:HGNC Symbol;Acc:HGNC:6263]
ENSG00000123975.5	547.133	-1.50944	0.501183	0.00022191	0.00195686	TRUE	1164	ENSG00000123975	protein_coding	9	89311195	89316703	1	CKS2	CDC28 protein kinase regulatory subunit 2 [Source:HGNC Symbol;Acc:HGNC:2000]
ENSG00000123989.15	3044.88	-1.48235	0.556356	0.000620429	0.00439614	TRUE	79586	ENSG00000123989	protein_coding	2	219538954	219543809	-1	CHPF	chondroitin polymerizing factor [Source:HGNC Symbol;Acc:HGNC:24291]
ENSG00000124097.8	2.81626	-1.27057	1.00311	0.0118069	0.0443104	TRUE	NA	ENSG00000124097	protein_coding	20	57487959	57495366	-1	HMGB1P1	high mobility group box 1 pseudogene 1 [Source:HGNC Symbol;Acc:HGNC:4993]
ENSG00000124191.18	91.9747	-1.08619	0.445915	0.00193828	0.0108254	TRUE	84969	ENSG00000124191	protein_coding	20	43914852	44069616	1	TOX2	TOX high mobility group box family member 2 [Source:HGNC Symbol;Acc:HGNC:16095]
ENSG00000124212.6	4875.04	1.78651	0.479454	1.37456e-05	0.000211274	TRUE	5740	ENSG00000124212	protein_coding	20	49503874	49568137	-1	PTGIS	prostaglandin I2 synthase [Source:HGNC Symbol;Acc:HGNC:9603]
ENSG00000124216.4	351.185	-1.77251	0.492102	2.41402e-05	0.00033106	TRUE	6615	ENSG00000124216	protein_coding	20	49982980	49988886	1	SNAI1	snail family transcriptional repressor 1 [Source:HGNC Symbol;Acc:HGNC:11128]
ENSG00000124243.19	103.543	-1.17945	0.279001	3.46929e-06	6.92154e-05	TRUE	55653	ENSG00000124243	protein_coding	20	50794894	50877177	1	BCAS4	breast carcinoma amplified sequence 4 [Source:HGNC Symbol;Acc:HGNC:14367]
ENSG00000124249.7	23.246	3.92346	0.623014	2.16741e-11	3.00557e-09	TRUE	60598	ENSG00000124249	protein_coding	20	44745865	44752313	1	KCNK15	potassium two pore domain channel subfamily K member 15 [Source:HGNC Symbol;Acc:HGNC:13814]
ENSG00000124302.13	11.8524	-5.17033	1.17141	1.0139e-07	3.76967e-06	TRUE	64377	ENSG00000124302	protein_coding	19	33621953	33773509	1	CHST8	carbohydrate sulfotransferase 8 [Source:HGNC Symbol;Acc:HGNC:15993]
ENSG00000124786.12	793.524	1.11849	0.130191	1.36606e-18	1.17192e-15	TRUE	51000	ENSG00000124786	protein_coding	6	8411435	8435561	-1	SLC35B3	solute carrier family 35 member B3 [Source:HGNC Symbol;Acc:HGNC:21601]
ENSG00000125144.14	2.90265	-2.34214	1.50717	0.00244087	0.0129851	TRUE	4495	ENSG00000125144	protein_coding	16	56666730	56668065	-1	MT1G	metallothionein 1G [Source:HGNC Symbol;Acc:HGNC:7399]
ENSG00000125148.7	2737.87	-3.08448	0.447888	3.71253e-13	8.59932e-11	TRUE	4502	ENSG00000125148	protein_coding	16	56608584	56609497	1	MT2A	metallothionein 2A [Source:HGNC Symbol;Acc:HGNC:7406]
ENSG00000125354.24	568.997	-1.16986	0.206985	2.41387e-09	1.60208e-07	TRUE	23157	ENSG00000125354	protein_coding	X	119615724	119693370	-1	SEPTIN6	septin 6 [Source:HGNC Symbol;Acc:HGNC:15848]
ENSG00000125503.13	812.609	-1.00987	0.349834	0.000603396	0.00430045	TRUE	54776	ENSG00000125503	protein_coding	19	55090914	55117637	-1	PPP1R12C	protein phosphatase 1 regulatory subunit 12C [Source:HGNC Symbol;Acc:HGNC:14947]
ENSG00000125505.17	1493.42	-1.06743	0.239645	1.43868e-06	3.37972e-05	TRUE	79143	ENSG00000125505	protein_coding	19	54173412	54189882	-1	MBOAT7	membrane bound O-acyltransferase domain containing 7 [Source:HGNC Symbol;Acc:HGNC:15505]
ENSG00000125534.10	1089.92	-1.38613	0.434219	0.000140703	0.0013533	TRUE	79144	ENSG00000125534	protein_coding	20	63520765	63522206	1	PPDPF	pancreatic progenitor cell differentiation and proliferation factor [Source:HGNC Symbol;Acc:HGNC:16142]
ENSG00000125551.19	50.6569	1.15799	0.464051	0.00137642	0.00828104	TRUE	5342	ENSG00000125551	protein_coding	2	87748087	87759476	1	PLGLB2	plasminogen like B2 [Source:HGNC Symbol;Acc:HGNC:9073]
ENSG00000125629.16	520.572	1.12208	0.19839	2.39632e-09	1.595e-07	TRUE	51141	ENSG00000125629	protein_coding	2	118088452	118110997	1	INSIG2	insulin induced gene 2 [Source:HGNC Symbol;Acc:HGNC:20452]
ENSG00000125652.8	149.634	-1.2334	0.455138	0.000760412	0.00514893	TRUE	84266	ENSG00000125652	protein_coding	19	6372794	6375250	1	ALKBH7	alkB homolog 7 [Source:HGNC Symbol;Acc:HGNC:21306]
ENSG00000125656.11	432.757	-1.36959	0.31507	1.60639e-06	3.70237e-05	TRUE	8192	ENSG00000125656	protein_coding	19	6361531	6370242	1	CLPP	caseinolytic mitochondrial matrix peptidase proteolytic subunit [Source:HGNC Symbol;Acc:HGNC:2084]
ENSG00000125730.17	133.865	2.92159	0.888158	3.67336e-05	0.000461421	TRUE	718	ENSG00000125730	protein_coding	19	6677704	6730562	-1	C3	complement C3 [Source:HGNC Symbol;Acc:HGNC:1318]
ENSG00000125835.20	1860.21	-1.31152	0.254331	3.12378e-08	1.42153e-06	TRUE	6628	ENSG00000125835	protein_coding	20	2461634	2470853	-1	SNRPB	small nuclear ribonucleoprotein polypeptides B and B1 [Source:HGNC Symbol;Acc:HGNC:11153]
ENSG00000125885.13	298.44	-1.84123	0.419665	9.30605e-07	2.40845e-05	TRUE	84515	ENSG00000125885	protein_coding	20	5950652	5998977	1	MCM8	minichromosome maintenance 8 homologous recombination repair factor [Source:HGNC Symbol;Acc:HGNC:16147]
ENSG00000125898.13	54.8765	-1.06925	0.299555	5.93463e-05	0.000681864	TRUE	83541	ENSG00000125898	protein_coding	20	833715	857463	1	FAM110A	family with sequence similarity 110 member A [Source:HGNC Symbol;Acc:HGNC:16188]
ENSG00000125912.11	1081.51	-1.71968	0.357944	1.39074e-07	4.89995e-06	TRUE	56926	ENSG00000125912	protein_coding	19	3185563	3209575	1	NCLN	nicalin [Source:HGNC Symbol;Acc:HGNC:26923]
ENSG00000125965.9	57.1283	2.58778	0.601362	8.34835e-07	2.21946e-05	TRUE	8200	ENSG00000125965	protein_coding	20	35433347	35454746	-1	GDF5	growth differentiation factor 5 [Source:HGNC Symbol;Acc:HGNC:4220]
ENSG00000125967.17	169.239	-1.18809	0.34353	7.35496e-05	0.000805118	TRUE	63941	ENSG00000125967	protein_coding	20	33657087	33674463	-1	NECAB3	N-terminal EF-hand calcium binding protein 3 [Source:HGNC Symbol;Acc:HGNC:15851]
ENSG00000125968.9	1877.34	-1.6129	0.488372	7.85827e-05	0.000850169	TRUE	3397	ENSG00000125968	protein_coding	20	31605283	31606515	1	ID1	inhibitor of DNA binding 1, HLH protein [Source:HGNC Symbol;Acc:HGNC:5360]
ENSG00000125995.16	395.35	-1.42258	0.400125	3.85634e-05	0.000480239	TRUE	140823	ENSG00000125995	protein_coding	20	35699272	35700984	1	ROMO1	reactive oxygen species modulator 1 [Source:HGNC Symbol;Acc:HGNC:16185]
ENSG00000126016.17	270.982	1.07436	0.455463	0.00222902	0.0120802	TRUE	154796	ENSG00000126016	protein_coding	X	112774503	112840831	-1	AMOT	angiomotin [Source:HGNC Symbol;Acc:HGNC:17810]
ENSG00000126215.14	125.511	-1.00763	0.265979	2.88282e-05	0.000383622	TRUE	7517	ENSG00000126215	protein_coding	14	103697609	103715504	-1	XRCC3	X-ray repair cross complementing 3 [Source:HGNC Symbol;Acc:HGNC:12830]
ENSG00000126254.12	555.329	-1.12069	0.310331	4.5586e-05	0.000550526	TRUE	79171	ENSG00000126254	protein_coding	19	35629030	35637686	1	RBM42	RNA binding motif protein 42 [Source:HGNC Symbol;Acc:HGNC:28117]
ENSG00000126453.10	147.444	-1.66133	0.365713	5.32047e-07	1.51398e-05	TRUE	83596	ENSG00000126453	protein_coding	19	49665142	49673916	1	BCL2L12	BCL2 like 12 [Source:HGNC Symbol;Acc:HGNC:13787]
ENSG00000126464.15	274.403	-1.20179	0.373381	0.000160919	0.00151234	TRUE	57479	ENSG00000126464	protein_coding	19	49591182	49626439	1	PRR12	proline rich 12 [Source:HGNC Symbol;Acc:HGNC:29217]
ENSG00000126500.4	5.81387	-2.21537	0.934745	0.00117935	0.00732761	TRUE	23769	ENSG00000126500	protein_coding	11	64035931	64119173	1	FLRT1	fibronectin leucine rich transmembrane protein 1 [Source:HGNC Symbol;Acc:HGNC:3760]
ENSG00000126562.17	247.404	-1.34913	0.479526	0.000474686	0.00355946	TRUE	65266	ENSG00000126562	protein_coding	17	42780610	42797066	1	WNK4	WNK lysine deficient protein kinase 4 [Source:HGNC Symbol;Acc:HGNC:14544]
ENSG00000126775.9	413.53	1.12267	0.135456	1.87134e-17	1.08365e-14	TRUE	22863	ENSG00000126775	protein_coding	14	55366391	55411830	-1	ATG14	autophagy related 14 [Source:HGNC Symbol;Acc:HGNC:19962]
ENSG00000126778.12	112.417	1.61538	0.414281	7.32928e-06	0.000126128	TRUE	6495	ENSG00000126778	protein_coding	14	60643421	60658259	-1	SIX1	SIX homeobox 1 [Source:HGNC Symbol;Acc:HGNC:10887]
ENSG00000126785.13	205.724	-1.32973	0.605287	0.00237153	0.012701	TRUE	57381	ENSG00000126785	protein_coding	14	63204114	63293508	1	RHOJ	ras homolog family member J [Source:HGNC Symbol;Acc:HGNC:688]
ENSG00000126787.13	675.927	-1.96042	0.669366	0.000206601	0.00185126	TRUE	9787	ENSG00000126787	protein_coding	14	55148112	55191608	-1	DLGAP5	DLG associated protein 5 [Source:HGNC Symbol;Acc:HGNC:16864]
ENSG00000126803.10	1216.58	-1.13503	0.455996	0.00155369	0.00908559	TRUE	3306	ENSG00000126803	protein_coding	14	64535905	64546173	1	HSPA2	heat shock protein family A (Hsp70) member 2 [Source:HGNC Symbol;Acc:HGNC:5235]
ENSG00000126821.8	487.491	1.50127	0.212184	1.54279e-13	3.84253e-11	TRUE	81537	ENSG00000126821	protein_coding	14	63684216	63728065	-1	SGPP1	sphingosine-1-phosphate phosphatase 1 [Source:HGNC Symbol;Acc:HGNC:17720]
ENSG00000126950.8	49.7555	3.0984	0.807635	4.58571e-06	8.67802e-05	TRUE	59353	ENSG00000126950	protein_coding	X	101078879	101096367	1	TMEM35A	transmembrane protein 35A [Source:HGNC Symbol;Acc:HGNC:25864]
ENSG00000127083.8	13.0629	2.0481	0.707003	0.000200443	0.00180305	TRUE	4958	ENSG00000127083	protein_coding	9	92412380	92424471	-1	OMD	osteomodulin [Source:HGNC Symbol;Acc:HGNC:8134]
ENSG00000127191.18	156.073	-1.26271	0.352238	4.26445e-05	0.000520978	TRUE	7186	ENSG00000127191	protein_coding	9	136881912	136926607	1	TRAF2	TNF receptor associated factor 2 [Source:HGNC Symbol;Acc:HGNC:12032]
ENSG00000127241.18	2034.88	1.09975	0.556441	0.00524981	0.0236809	TRUE	5648	ENSG00000127241	protein_coding	3	187217282	187291980	-1	MASP1	MBL associated serine protease 1 [Source:HGNC Symbol;Acc:HGNC:6901]
ENSG00000127423.11	52.2594	-1.65916	0.457166	2.15161e-05	0.000301011	TRUE	79000	ENSG00000127423	protein_coding	1	25831913	25859458	-1	AUNIP	aurora kinase A and ninein interacting protein [Source:HGNC Symbol;Acc:HGNC:28363]
ENSG00000127445.14	472.066	-1.29403	0.297307	1.67877e-06	3.81603e-05	TRUE	5300	ENSG00000127445	protein_coding	19	9835257	9849689	1	PIN1	peptidylprolyl cis/trans isomerase, NIMA-interacting 1 [Source:HGNC Symbol;Acc:HGNC:8988]
ENSG00000127561.16	3.32048	-1.38483	0.811091	0.00827325	0.033768	TRUE	9143	ENSG00000127561	protein_coding	16	1989660	1994275	1	SYNGR3	synaptogyrin 3 [Source:HGNC Symbol;Acc:HGNC:11501]
ENSG00000127564.17	185.643	-2.25933	0.50311	5.10943e-07	1.46472e-05	TRUE	9088	ENSG00000127564	protein_coding	16	2968024	2980479	-1	PKMYT1	protein kinase, membrane associated tyrosine/threonine 1 [Source:HGNC Symbol;Acc:HGNC:29650]
ENSG00000127580.17	92.4755	-1.24649	0.349497	4.62594e-05	0.000557206	TRUE	84219	ENSG00000127580	protein_coding	16	684622	690444	-1	WDR24	WD repeat domain 24 [Source:HGNC Symbol;Acc:HGNC:20852]
ENSG00000127586.17	131.091	-3.06572	0.5574	2.47787e-09	1.63518e-07	TRUE	63922	ENSG00000127586	protein_coding	16	788046	800737	1	CHTF18	chromosome transmission fidelity factor 18 [Source:HGNC Symbol;Acc:HGNC:18435]
ENSG00000127774.7	197.478	-1.03766	0.199101	3.68268e-08	1.60947e-06	TRUE	83460	ENSG00000127774	protein_coding	17	3668812	3669668	1	EMC6	ER membrane protein complex subunit 6 [Source:HGNC Symbol;Acc:HGNC:28430]
ENSG00000127831.11	2.52717	-5.66543	2.72118	0.000182474	0.00166731	TRUE	7429	ENSG00000127831	protein_coding	2	218419121	218453295	1	VIL1	villin 1 [Source:HGNC Symbol;Acc:HGNC:12690]
ENSG00000127995.17	212.489	1.52356	0.226687	1.70015e-12	3.25459e-10	TRUE	64921	ENSG00000127995	protein_coding	7	94509219	94557019	1	CASD1	CAS1 domain containing 1 [Source:HGNC Symbol;Acc:HGNC:16014]
ENSG00000128045.7	51.0022	-1.93213	0.607264	9.34906e-05	0.000978105	TRUE	65997	ENSG00000128045	protein_coding	4	52862317	52866835	1	RASL11B	RAS like family 11 member B [Source:HGNC Symbol;Acc:HGNC:23804]
ENSG00000128052.10	16.9826	-1.98818	0.613506	7.43897e-05	0.000812778	TRUE	3791	ENSG00000128052	protein_coding	4	55078481	55125595	-1	KDR	kinase insert domain receptor [Source:HGNC Symbol;Acc:HGNC:6307]
ENSG00000128185.10	356.709	-1.28311	0.269797	2.66265e-07	8.55408e-06	TRUE	85359	ENSG00000128185	protein_coding	22	20314238	20320080	-1	DGCR6L	DiGeorge syndrome critical region gene 6 like [Source:HGNC Symbol;Acc:HGNC:18551]
ENSG00000128228.5	95.8834	-1.42235	0.352805	6.17955e-06	0.00011061	TRUE	23753	ENSG00000128228	protein_coding	22	21642302	21644299	1	SDF2L1	stromal cell derived factor 2 like 1 [Source:HGNC Symbol;Acc:HGNC:10676]
ENSG00000128284.19	83.8799	2.1119	0.585765	1.70552e-05	0.000249716	TRUE	80833	ENSG00000128284	protein_coding	22	36140330	36166177	-1	APOL3	apolipoprotein L3 [Source:HGNC Symbol;Acc:HGNC:14868]
ENSG00000128309.17	355.997	-1.27916	0.421179	0.000264311	0.00225082	TRUE	4357	ENSG00000128309	protein_coding	22	37019635	37029821	1	MPST	mercaptopyruvate sulfurtransferase [Source:HGNC Symbol;Acc:HGNC:7223]
ENSG00000128408.9	18.207	-1.89537	0.795468	0.000880755	0.00577307	TRUE	26150	ENSG00000128408	protein_coding	22	45413693	45432509	1	RIBC2	RIB43A domain with coiled-coils 2 [Source:HGNC Symbol;Acc:HGNC:13241]
ENSG00000128487.19	270.514	-1.06017	0.441748	0.00221075	0.0119952	TRUE	92521	ENSG00000128487	protein_coding	17	20008865	20319026	1	SPECC1	sperm antigen with calponin homology and coiled-coil domains 1 [Source:HGNC Symbol;Acc:HGNC:30615]
ENSG00000128510.12	143.168	1.06353	0.433311	0.00181041	0.0102579	TRUE	51200	ENSG00000128510	protein_coding	7	130293134	130324180	1	CPA4	carboxypeptidase A4 [Source:HGNC Symbol;Acc:HGNC:15740]
ENSG00000128536.16	55.1305	1.27561	0.370962	6.4752e-05	0.000730209	TRUE	222256	ENSG00000128536	protein_coding	7	105876796	106036432	1	CDHR3	cadherin related family member 3 [Source:HGNC Symbol;Acc:HGNC:26308]
ENSG00000128591.16	10722.4	-1.02414	0.326912	0.000284162	0.00238307	TRUE	2318	ENSG00000128591	protein_coding	7	128830406	128859274	1	FLNC	filamin C [Source:HGNC Symbol;Acc:HGNC:3756]
ENSG00000128594.8	26.4154	-2.2776	0.578565	5.2528e-06	9.67174e-05	TRUE	64101	ENSG00000128594	protein_coding	7	128027071	128032107	-1	LRRC4	leucine rich repeat containing 4 [Source:HGNC Symbol;Acc:HGNC:15586]
ENSG00000128602.11	88.9489	-1.6031	0.459672	3.95289e-05	0.000488324	TRUE	6608	ENSG00000128602	protein_coding	7	129188633	129213545	1	SMO	smoothened, frizzled class receptor [Source:HGNC Symbol;Acc:HGNC:11119]
ENSG00000128626.12	243.512	-1.52219	0.26809	1.56017e-09	1.11883e-07	TRUE	6183	ENSG00000128626	protein_coding	19	38930944	38933168	1	MRPS12	mitochondrial ribosomal protein S12 [Source:HGNC Symbol;Acc:HGNC:10380]
ENSG00000128683.14	55.8903	1.47627	0.636277	0.00127526	0.00780411	TRUE	2571	ENSG00000128683	protein_coding	2	170813213	170861151	1	GAD1	glutamate decarboxylase 1 [Source:HGNC Symbol;Acc:HGNC:4092]
ENSG00000128692.8	217.921	1.2814	0.405481	0.000160712	0.00151234	TRUE	NA	ENSG00000128692	processed_pseudogene	2	170751805	170752788	1	EIF2S2P4	eukaryotic translation initiation factor 2 subunit 2 beta pseudogene 4 [Source:HGNC Symbol;Acc:HGNC:37626]
ENSG00000128709.13	88.5731	1.00914	0.385217	0.00128633	0.00785535	TRUE	3235	ENSG00000128709	protein_coding	2	176122719	176124937	1	HOXD9	homeobox D9 [Source:HGNC Symbol;Acc:HGNC:5140]
ENSG00000128710.6	158.662	3.88876	1.08635	9.6905e-06	0.000158294	TRUE	3236	ENSG00000128710	protein_coding	2	176108790	176119937	1	HOXD10	homeobox D10 [Source:HGNC Symbol;Acc:HGNC:5133]
ENSG00000128713.14	56.9517	3.25062	1.4597	0.000508867	0.00376338	TRUE	3237	ENSG00000128713	protein_coding	2	176104216	176109754	1	HOXD11	homeobox D11 [Source:HGNC Symbol;Acc:HGNC:5134]
ENSG00000128714.6	7.60789	4.86387	2.18758	0.000266346	0.00226482	TRUE	3239	ENSG00000128714	protein_coding	2	176092721	176095944	1	HOXD13	homeobox D13 [Source:HGNC Symbol;Acc:HGNC:5136]
ENSG00000128923.11	1069.47	1.25671	0.178809	2.72897e-13	6.56869e-11	TRUE	54629	ENSG00000128923	protein_coding	15	58771192	58861900	1	MINDY2	MINDY lysine 48 deubiquitinase 2 [Source:HGNC Symbol;Acc:HGNC:26954]
ENSG00000128944.14	551.514	-1.50635	0.432114	4.54628e-05	0.00054983	TRUE	90417	ENSG00000128944	protein_coding	15	40382721	40394288	1	KNSTRN	kinetochore localized astrin (SPAG5) binding protein [Source:HGNC Symbol;Acc:HGNC:30767]
ENSG00000129003.19	1447.16	1.42459	0.165637	8.67505e-19	8.70287e-16	TRUE	54832	ENSG00000129003	protein_coding	15	61852389	62060473	-1	VPS13C	vacuolar protein sorting 13 homolog C [Source:HGNC Symbol;Acc:HGNC:23594]
ENSG00000129009.13	8326.14	-1.00795	0.363451	0.000851835	0.00561978	TRUE	3671	ENSG00000129009	protein_coding	15	74173710	74176872	1	ISLR	immunoglobulin superfamily containing leucine rich repeat [Source:HGNC Symbol;Acc:HGNC:6133]
ENSG00000129048.7	1128.18	3.21581	0.644472	2.61183e-08	1.23971e-06	TRUE	51554	ENSG00000129048	protein_coding	3	132597270	132618967	1	ACKR4	atypical chemokine receptor 4 [Source:HGNC Symbol;Acc:HGNC:1611]
ENSG00000129195.16	415.556	-2.45906	0.546594	4.29516e-07	1.27668e-05	TRUE	54478	ENSG00000129195	protein_coding	17	6444441	6451469	1	PIMREG	PICALM interacting mitotic regulator [Source:HGNC Symbol;Acc:HGNC:25483]
ENSG00000129295.10	44.3436	1.324	0.364978	2.98507e-05	0.000392191	TRUE	23639	ENSG00000129295	protein_coding	8	132570416	132675592	-1	DNAAF11	dynein axonemal assembly factor 11 [Source:HGNC Symbol;Acc:HGNC:16725]
ENSG00000129355.7	218.271	-1.66101	0.345783	1.44493e-07	5.0481e-06	TRUE	1032	ENSG00000129355	protein_coding	19	10566460	10569059	-1	CDKN2D	cyclin dependent kinase inhibitor 2D [Source:HGNC Symbol;Acc:HGNC:1790]
ENSG00000129675.16	542.2	1.38968	0.350669	7.31166e-06	0.000126014	TRUE	9459	ENSG00000129675	protein_coding	X	136665547	136780932	-1	ARHGEF6	Rac/Cdc42 guanine nucleotide exchange factor 6 [Source:HGNC Symbol;Acc:HGNC:685]
ENSG00000129682.16	107.474	3.49818	0.796718	4.20365e-07	1.25476e-05	TRUE	2258	ENSG00000129682	protein_coding	X	138614727	139222777	-1	FGF13	fibroblast growth factor 13 [Source:HGNC Symbol;Acc:HGNC:3670]
ENSG00000129810.15	86.4177	-1.39387	0.500572	0.000505517	0.00374327	TRUE	151648	ENSG00000129810	protein_coding	3	20160593	20186206	-1	SGO1	shugoshin 1 [Source:HGNC Symbol;Acc:HGNC:25088]
ENSG00000129911.9	243.671	-1.42115	0.445706	0.000138341	0.00133572	TRUE	83855	ENSG00000129911	protein_coding	19	1852399	1863579	-1	KLF16	Kruppel like factor 16 [Source:HGNC Symbol;Acc:HGNC:16857]
ENSG00000129932.10	86.0385	-1.99958	0.453808	8.51709e-07	2.2495e-05	TRUE	83475	ENSG00000129932	protein_coding	19	3490821	3500674	-1	DOHH	deoxyhypusine hydroxylase [Source:HGNC Symbol;Acc:HGNC:28662]
ENSG00000129968.17	477.202	-1.76806	0.462934	1.06267e-05	0.000171292	TRUE	81926	ENSG00000129968	protein_coding	19	1876810	1885496	-1	ABHD17A	abhydrolase domain containing 17A, depalmitoylase [Source:HGNC Symbol;Acc:HGNC:28756]
ENSG00000129990.15	2.55612	-1.40333	1.11293	0.00910486	0.03633	TRUE	6861	ENSG00000129990	protein_coding	19	55171196	55180289	-1	SYT5	synaptotagmin 5 [Source:HGNC Symbol;Acc:HGNC:11513]
ENSG00000130032.17	5.01896	4.95333	1.70118	5.80275e-05	0.000669702	TRUE	79057	ENSG00000130032	protein_coding	X	151694607	151705924	1	PRRG3	proline rich and Gla domain 3 [Source:HGNC Symbol;Acc:HGNC:30798]
ENSG00000130193.8	60.6945	-1.32148	0.329571	7.77696e-06	0.00013226	TRUE	51337	ENSG00000130193	protein_coding	8	142727223	142736927	1	THEM6	thioesterase superfamily member 6 [Source:HGNC Symbol;Acc:HGNC:29656]
ENSG00000130204.13	522.811	-1.07672	0.241044	1.37371e-06	3.27357e-05	TRUE	10452	ENSG00000130204	protein_coding	19	44890569	44903689	1	TOMM40	translocase of outer mitochondrial membrane 40 [Source:HGNC Symbol;Acc:HGNC:18001]
ENSG00000130255.13	2352.37	-1.01473	0.378722	0.00115233	0.00718475	TRUE	25873	ENSG00000130255	protein_coding	19	5674947	5691875	1	RPL36	ribosomal protein L36 [Source:HGNC Symbol;Acc:HGNC:13631]
ENSG00000130270.16	93.2433	-1.26122	0.436001	0.000426287	0.00328042	TRUE	148229	ENSG00000130270	protein_coding	19	1782075	1812276	-1	ATP8B3	ATPase phospholipid transporting 8B3 [Source:HGNC Symbol;Acc:HGNC:13535]
ENSG00000130299.17	114.952	-1.12757	0.245753	7.12631e-07	1.94425e-05	TRUE	84705	ENSG00000130299	protein_coding	19	17334920	17342731	1	GTPBP3	GTP binding protein 3, mitochondrial [Source:HGNC Symbol;Acc:HGNC:14880]
ENSG00000130303.14	38.4553	4.38517	1.25416	1.26379e-05	0.000197792	TRUE	684	ENSG00000130303	protein_coding	19	17402939	17405630	-1	BST2	bone marrow stromal cell antigen 2 [Source:HGNC Symbol;Acc:HGNC:1119]
ENSG00000130305.17	155.199	-1.23902	0.327528	2.00696e-05	0.000284152	TRUE	55695	ENSG00000130305	protein_coding	7	73302516	73308826	-1	NSUN5	NOP2/Sun RNA methyltransferase 5 [Source:HGNC Symbol;Acc:HGNC:16385]
ENSG00000130332.15	328.773	-1.36585	0.25798	1.48243e-08	7.64756e-07	TRUE	51690	ENSG00000130332	protein_coding	19	2321520	2328611	-1	LSM7	LSM7 homolog, U6 small nuclear RNA and mRNA degradation associated [Source:HGNC Symbol;Acc:HGNC:20470]
ENSG00000130382.9	1138.65	-1.00518	0.327416	0.000345455	0.0027784	TRUE	4298	ENSG00000130382	protein_coding	19	6210381	6279975	-1	MLLT1	MLLT1 super elongation complex subunit [Source:HGNC Symbol;Acc:HGNC:7134]
ENSG00000130413.16	3.11298	-2.28145	0.886298	0.00072599	0.00497518	TRUE	65975	ENSG00000130413	protein_coding	11	8391868	8594289	-1	STK33	serine/threonine kinase 33 [Source:HGNC Symbol;Acc:HGNC:14568]
ENSG00000130429.15	2635.43	-1.15879	0.208802	4.46934e-09	2.68107e-07	TRUE	10095	ENSG00000130429	protein_coding	7	99374249	99394816	1	ARPC1B	actin related protein 2/3 complex subunit 1B [Source:HGNC Symbol;Acc:HGNC:704]
ENSG00000130520.11	864.622	-1.15227	0.206552	3.87364e-09	2.36119e-07	TRUE	25804	ENSG00000130520	protein_coding	19	18306236	18323112	-1	LSM4	LSM4 homolog, U6 small nuclear RNA and mRNA degradation associated [Source:HGNC Symbol;Acc:HGNC:17259]
ENSG00000130590.14	14.4602	-1.17409	0.456903	0.00134515	0.00812246	TRUE	140700	ENSG00000130590	protein_coding	20	63974116	63980008	-1	SAMD10	sterile alpha motif domain containing 10 [Source:HGNC Symbol;Acc:HGNC:16129]
ENSG00000130669.17	250.891	-1.60996	0.206222	7.2335e-16	2.93947e-13	TRUE	10298	ENSG00000130669	protein_coding	19	39125770	39182816	1	PAK4	p21 (RAC1) activated kinase 4 [Source:HGNC Symbol;Acc:HGNC:16059]
ENSG00000130695.16	266.71	-1.25099	0.270628	5.13554e-07	1.47039e-05	TRUE	64793	ENSG00000130695	protein_coding	1	26234200	26278808	1	CEP85	centrosomal protein 85 [Source:HGNC Symbol;Acc:HGNC:25309]
ENSG00000130702.15	35.0694	-1.67722	0.662829	0.000773623	0.00520914	TRUE	3911	ENSG00000130702	protein_coding	20	62307955	62367312	-1	LAMA5	laminin subunit alpha 5 [Source:HGNC Symbol;Acc:HGNC:6485]
ENSG00000130706.13	894.249	-1.46531	0.267939	5.02593e-09	2.97738e-07	TRUE	11047	ENSG00000130706	protein_coding	20	62302093	62308862	1	ADRM1	ADRM1 26S proteasome ubiquitin receptor [Source:HGNC Symbol;Acc:HGNC:15759]
ENSG00000130720.13	127.47	-1.42722	0.710746	0.00311702	0.015716	TRUE	84929	ENSG00000130720	protein_coding	9	130902438	130939286	-1	FIBCD1	fibrinogen C domain containing 1 [Source:HGNC Symbol;Acc:HGNC:25922]
ENSG00000130734.10	98.4102	-1.26623	0.255095	1.06268e-07	3.92815e-06	TRUE	84971	ENSG00000130734	protein_coding	19	10543895	10553418	1	ATG4D	autophagy related 4D cysteine peptidase [Source:HGNC Symbol;Acc:HGNC:20789]
ENSG00000130748.7	26.3955	-1.10932	0.523599	0.00417811	0.0198013	TRUE	54958	ENSG00000130748	protein_coding	19	47045909	47048624	-1	TMEM160	transmembrane protein 160 [Source:HGNC Symbol;Acc:HGNC:26042]
ENSG00000130940.15	16.9895	-1.65189	0.621192	0.000586785	0.00420535	TRUE	54897	ENSG00000130940	protein_coding	1	10636604	10796650	-1	CASZ1	castor zinc finger 1 [Source:HGNC Symbol;Acc:HGNC:26002]
ENSG00000131015.5	303.931	-1.29966	0.463918	0.000521613	0.00383681	TRUE	80328	ENSG00000131015	protein_coding	6	149942014	149949235	1	ULBP2	UL16 binding protein 2 [Source:HGNC Symbol;Acc:HGNC:14894]
ENSG00000131037.15	8.32079	-1.73581	0.573595	0.000202104	0.00181588	TRUE	54869	ENSG00000131037	protein_coding	19	55072020	55087923	1	EPS8L1	EPS8 like 1 [Source:HGNC Symbol;Acc:HGNC:21295]
ENSG00000131080.15	428.175	1.44466	0.272773	1.12093e-08	5.99631e-07	TRUE	60401	ENSG00000131080	protein_coding	X	66595637	66639298	-1	EDA2R	ectodysplasin A2 receptor [Source:HGNC Symbol;Acc:HGNC:17756]
ENSG00000131094.4	6.59514	-1.53224	0.826836	0.00422418	0.0199439	TRUE	10882	ENSG00000131094	protein_coding	17	44959693	44968303	-1	C1QL1	complement C1q like 1 [Source:HGNC Symbol;Acc:HGNC:24182]
ENSG00000131153.9	176.415	-1.46143	0.499824	0.000307874	0.00253512	TRUE	51659	ENSG00000131153	protein_coding	16	85676198	85690073	-1	GINS2	GINS complex subunit 2 [Source:HGNC Symbol;Acc:HGNC:24575]
ENSG00000131188.12	14.5702	-1.44052	0.782042	0.00441572	0.0206462	TRUE	80758	ENSG00000131188	protein_coding	5	177446445	177456286	1	PRR7	proline rich 7, synaptic [Source:HGNC Symbol;Acc:HGNC:28130]
ENSG00000131203.13	4.27049	-3.3914	1.80686	0.00239738	0.0128061	TRUE	3620	ENSG00000131203	protein_coding	8	39902275	39928790	1	IDO1	indoleamine 2,3-dioxygenase 1 [Source:HGNC Symbol;Acc:HGNC:6059]
ENSG00000131351.15	156.449	-1.71619	0.432487	6.18673e-06	0.00011061	TRUE	93323	ENSG00000131351	protein_coding	19	17049729	17075625	-1	HAUS8	HAUS augmin like complex subunit 8 [Source:HGNC Symbol;Acc:HGNC:30532]
ENSG00000131462.9	938.518	-1.00752	0.24867	9.43162e-06	0.00015472	TRUE	7283	ENSG00000131462	protein_coding	17	42609641	42615238	1	TUBG1	tubulin gamma 1 [Source:HGNC Symbol;Acc:HGNC:12417]
ENSG00000131470.15	168.765	-2.05201	0.400246	2.27183e-08	1.09859e-06	TRUE	29893	ENSG00000131470	protein_coding	17	42572310	42577831	-1	PSMC3IP	PSMC3 interacting protein [Source:HGNC Symbol;Acc:HGNC:17928]
ENSG00000131584.19	585.658	-1.08499	0.307909	6.67763e-05	0.000746856	TRUE	116983	ENSG00000131584	protein_coding	1	1292390	1309609	-1	ACAP3	ArfGAP with coiled-coil, ankyrin repeat and PH domains 3 [Source:HGNC Symbol;Acc:HGNC:16754]
ENSG00000131591.18	65.6623	-1.60253	0.408083	8.89989e-06	0.000147858	TRUE	54991	ENSG00000131591	protein_coding	1	1081818	1116361	-1	C1orf159	chromosome 1 open reading frame 159 [Source:HGNC Symbol;Acc:HGNC:26062]
ENSG00000131620.18	27.2726	-3.58135	1.2928	0.000201556	0.00181236	TRUE	55107	ENSG00000131620	protein_coding	11	69985907	70189530	1	ANO1	anoctamin 1 [Source:HGNC Symbol;Acc:HGNC:21625]
ENSG00000131737.7	913.41	-1.2643	1.26133	0.0119755	0.0447616	TRUE	3885	ENSG00000131737	protein_coding	17	41377669	41382306	-1	KRT34	keratin 34 [Source:HGNC Symbol;Acc:HGNC:6452]
ENSG00000131738.11	12.6357	-2.2968	0.777381	0.000158243	0.00149303	TRUE	3884	ENSG00000131738	protein_coding	17	41363498	41369813	-1	KRT33B	keratin 33B [Source:HGNC Symbol;Acc:HGNC:6451]
ENSG00000131747.15	3332.24	-1.70354	0.524871	8.85142e-05	0.000934483	TRUE	7153	ENSG00000131747	protein_coding	17	40388525	40417896	-1	TOP2A	DNA topoisomerase II alpha [Source:HGNC Symbol;Acc:HGNC:11989]
ENSG00000131969.15	2.39436	2.59816	1.70257	0.00212471	0.0116264	TRUE	145447	ENSG00000131969	protein_coding	14	50872053	50904970	1	ABHD12B	abhydrolase domain containing 12B [Source:HGNC Symbol;Acc:HGNC:19837]
ENSG00000132017.11	235.035	-1.48801	0.234705	2.87421e-11	3.82616e-09	TRUE	90379	ENSG00000132017	protein_coding	19	13952509	13961449	1	DCAF15	DDB1 and CUL4 associated factor 15 [Source:HGNC Symbol;Acc:HGNC:25095]
ENSG00000132207.18	146.271	-1.18703	0.326764	3.8374e-05	0.000478395	TRUE	548593	ENSG00000132207	protein_coding	16	30193875	30197561	1	SLX1A	SLX1 homolog A, structure-specific endonuclease subunit [Source:HGNC Symbol;Acc:HGNC:20922]
ENSG00000132274.16	1680.56	1.20176	0.330276	3.35516e-05	0.000429367	TRUE	10346	ENSG00000132274	protein_coding	11	5689697	5737089	1	TRIM22	tripartite motif containing 22 [Source:HGNC Symbol;Acc:HGNC:16379]
ENSG00000132386.11	1048.21	1.19426	0.533849	0.00237813	0.0127275	TRUE	5176	ENSG00000132386	protein_coding	17	1762029	1777565	1	SERPINF1	serpin family F member 1 [Source:HGNC Symbol;Acc:HGNC:8824]
ENSG00000132465.12	32.3253	1.4108	0.521136	0.000500125	0.0037201	TRUE	3512	ENSG00000132465	protein_coding	4	70655541	70681817	-1	JCHAIN	joining chain of multimeric IgA and IgM [Source:HGNC Symbol;Acc:HGNC:5713]
ENSG00000132530.17	318.032	1.19874	0.291111	4.85683e-06	9.06496e-05	TRUE	54739	ENSG00000132530	protein_coding	17	6755447	6775647	1	XAF1	XIAP associated factor 1 [Source:HGNC Symbol;Acc:HGNC:30932]
ENSG00000132541.11	266.377	1.09818	0.185342	5.082e-10	4.42535e-08	TRUE	10247	ENSG00000132541	protein_coding	8	98102344	98117171	-1	RIDA	reactive intermediate imine deaminase A homolog [Source:HGNC Symbol;Acc:HGNC:16897]
ENSG00000132669.14	936.682	1.02202	0.206623	1.33751e-07	4.74435e-06	TRUE	54453	ENSG00000132669	protein_coding	20	19757606	20002457	1	RIN2	Ras and Rab interactor 2 [Source:HGNC Symbol;Acc:HGNC:18750]
ENSG00000132749.11	4.71128	-1.93195	1.08608	0.00368867	0.0179341	TRUE	9633	ENSG00000132749	protein_coding	11	68707440	68751520	-1	TESMIN	testis expressed metallothionein like protein [Source:HGNC Symbol;Acc:HGNC:7446]
ENSG00000132819.17	54.1308	-1.1756	0.276316	3.38751e-06	6.77589e-05	TRUE	55544	ENSG00000132819	protein_coding	20	57391396	57409333	1	RBM38	RNA binding motif protein 38 [Source:HGNC Symbol;Acc:HGNC:15818]
ENSG00000132837.15	23.9537	1.23861	0.527259	0.00182234	0.0103129	TRUE	29958	ENSG00000132837	protein_coding	5	78997564	79236038	-1	DMGDH	dimethylglycine dehydrogenase [Source:HGNC Symbol;Acc:HGNC:24475]
ENSG00000132840.10	159.82	1.35435	0.475526	0.000391537	0.00307117	TRUE	23743	ENSG00000132840	protein_coding	5	79069767	79090069	1	BHMT2	betaine--homocysteine S-methyltransferase 2 [Source:HGNC Symbol;Acc:HGNC:1048]
ENSG00000132950.19	222.501	1.09908	0.204809	1.24668e-08	6.59186e-07	TRUE	9205	ENSG00000132950	protein_coding	13	19823482	19863649	-1	ZMYM5	zinc finger MYM-type containing 5 [Source:HGNC Symbol;Acc:HGNC:13029]
ENSG00000132967.9	1228.91	-1.29669	0.352308	2.7419e-05	0.000367899	TRUE	NA	ENSG00000132967	transcribed_processed_pseudogene	3	22381819	22382929	1	HMGB1P5	high mobility group box 1 pseudogene 5 [Source:HGNC Symbol;Acc:HGNC:4997]
ENSG00000133069.17	79.3627	-1.31514	0.332966	9.94902e-06	0.000161605	TRUE	9911	ENSG00000133069	protein_coding	1	205227946	205285632	1	TMCC2	transmembrane and coiled-coil domain family 2 [Source:HGNC Symbol;Acc:HGNC:24239]
ENSG00000133136.5	30.2756	-1.71287	0.756573	0.00145352	0.00862836	TRUE	NA	ENSG00000133136	protein_coding	X	110346103	110440372	-1	GNG5P2	G protein subunit gamma 5 pseudogene 2 [Source:HGNC Symbol;Acc:HGNC:24826]
ENSG00000133657.17	4391.78	1.62327	0.263103	6.21711e-11	7.38496e-09	TRUE	79572	ENSG00000133657	protein_coding	3	194402672	194498364	-1	ATP13A3	ATPase 13A3 [Source:HGNC Symbol;Acc:HGNC:24113]
ENSG00000133789.15	2742.04	1.17233	0.190023	9.79093e-11	1.10628e-08	TRUE	23075	ENSG00000133789	protein_coding	11	9664077	9752993	1	SWAP70	switching B cell complex subunit SWAP70 [Source:HGNC Symbol;Acc:HGNC:17070]
ENSG00000133818.14	2437.13	1.36556	0.203428	2.22695e-12	4.12663e-10	TRUE	22800	ENSG00000133818	protein_coding	11	14277922	14364506	-1	RRAS2	RAS related 2 [Source:HGNC Symbol;Acc:HGNC:17271]
ENSG00000133878.9	8.10689	-2.03959	1.07072	0.00241478	0.0128849	TRUE	78986	ENSG00000133878	protein_coding	8	33591330	33600023	-1	DUSP26	dual specificity phosphatase 26 [Source:HGNC Symbol;Acc:HGNC:28161]
ENSG00000134057.15	1465.6	-2.07027	0.60233	3.71814e-05	0.000466644	TRUE	891	ENSG00000134057	protein_coding	5	69167135	69178245	1	CCNB1	cyclin B1 [Source:HGNC Symbol;Acc:HGNC:1579]
ENSG00000134108.14	1393.03	1.06105	0.175302	2.37734e-10	2.35326e-08	TRUE	55207	ENSG00000134108	protein_coding	3	5122249	5180911	1	ARL8B	ADP ribosylation factor like GTPase 8B [Source:HGNC Symbol;Acc:HGNC:25564]
ENSG00000134201.12	174.019	1.57064	0.359865	1.10306e-06	2.77417e-05	TRUE	2949	ENSG00000134201	protein_coding	1	109711780	109775428	1	GSTM5	glutathione S-transferase mu 5 [Source:HGNC Symbol;Acc:HGNC:4637]
ENSG00000134215.16	18.2947	-1.20768	1.01997	0.0108085	0.0413882	TRUE	10451	ENSG00000134215	protein_coding	1	107571161	107965180	-1	VAV3	vav guanine nucleotide exchange factor 3 [Source:HGNC Symbol;Acc:HGNC:12659]
ENSG00000134222.16	312.812	-2.00837	0.431161	2.44566e-07	7.94e-06	TRUE	84722	ENSG00000134222	protein_coding	1	109279556	109283186	-1	PSRC1	proline and serine rich coiled-coil 1 [Source:HGNC Symbol;Acc:HGNC:24472]
ENSG00000134352.20	5988.84	1.08421	0.258659	6.20223e-06	0.00011068	TRUE	3572	ENSG00000134352	protein_coding	5	55935095	55995022	-1	IL6ST	interleukin 6 cytokine family signal transducer [Source:HGNC Symbol;Acc:HGNC:6021]
ENSG00000134363.12	2618	2.78263	0.476823	2.85052e-10	2.68253e-08	TRUE	10468	ENSG00000134363	protein_coding	5	53480626	53487134	1	FST	follistatin [Source:HGNC Symbol;Acc:HGNC:3971]
ENSG00000134531.10	11267.9	1.21637	0.22085	6.05419e-09	3.50583e-07	TRUE	2012	ENSG00000134531	protein_coding	12	13196723	13219941	1	EMP1	epithelial membrane protein 1 [Source:HGNC Symbol;Acc:HGNC:3333]
ENSG00000134690.11	527.179	-2.1908	0.533671	2.71333e-06	5.66207e-05	TRUE	55143	ENSG00000134690	protein_coding	1	37692481	37709719	1	CDCA8	cell division cycle associated 8 [Source:HGNC Symbol;Acc:HGNC:14629]
ENSG00000134769.23	39.0441	1.29051	0.64553	0.00347823	0.0170728	TRUE	1837	ENSG00000134769	protein_coding	18	34493291	34891844	1	DTNA	dystrobrevin alpha [Source:HGNC Symbol;Acc:HGNC:3057]
ENSG00000134815.19	157.161	-1.36948	0.227309	2.27574e-10	2.26236e-08	TRUE	9704	ENSG00000134815	protein_coding	19	47349315	47382704	1	DHX34	DExH-box helicase 34 [Source:HGNC Symbol;Acc:HGNC:16719]
ENSG00000134871.19	7859.19	-1.30305	0.369653	4.86329e-05	0.000580555	TRUE	1284	ENSG00000134871	protein_coding	13	110305812	110513209	1	COL4A2	collagen type IV alpha 2 chain [Source:HGNC Symbol;Acc:HGNC:2203]
ENSG00000134986.14	7165.16	1.14042	0.386862	0.000418703	0.00323496	TRUE	9315	ENSG00000134986	protein_coding	5	111662621	111997464	-1	NREP	neuronal regeneration related protein [Source:HGNC Symbol;Acc:HGNC:16834]
ENSG00000135069.14	1581.66	1.29277	0.508026	0.00101278	0.006484	TRUE	29968	ENSG00000135069	protein_coding	9	78297125	78330093	1	PSAT1	phosphoserine aminotransferase 1 [Source:HGNC Symbol;Acc:HGNC:19129]
ENSG00000135074.16	1717.33	-1.94706	0.386359	3.67539e-08	1.60947e-06	TRUE	8728	ENSG00000135074	protein_coding	5	157395534	157575775	-1	ADAM19	ADAM metallopeptidase domain 19 [Source:HGNC Symbol;Acc:HGNC:197]
ENSG00000135119.15	1.96699	-1.98559	1.90834	0.00531363	0.0239175	TRUE	84900	ENSG00000135119	protein_coding	12	116738178	116853631	1	RNFT2	ring finger protein, transmembrane 2 [Source:HGNC Symbol;Acc:HGNC:25905]
ENSG00000135205.15	37.4828	1.65081	0.346871	1.40144e-07	4.9133e-06	TRUE	57639	ENSG00000135205	protein_coding	7	77122434	77329533	1	CCDC146	coiled-coil domain containing 146 [Source:HGNC Symbol;Acc:HGNC:29296]
ENSG00000135324.6	49.7425	-1.55044	0.608178	0.000775117	0.00521439	TRUE	112609	ENSG00000135324	protein_coding	6	84033772	84090881	1	MRAP2	melanocortin 2 receptor accessory protein 2 [Source:HGNC Symbol;Acc:HGNC:21232]
ENSG00000135362.14	397.219	-1.12072	0.275024	7.16716e-06	0.000124541	TRUE	79899	ENSG00000135362	protein_coding	11	36296288	36465204	1	PRR5L	proline rich 5 like [Source:HGNC Symbol;Acc:HGNC:25878]
ENSG00000135414.10	351.697	-1.00067	0.213891	5.46186e-07	1.54096e-05	TRUE	10220	ENSG00000135414	protein_coding	12	55743122	55757264	1	GDF11	growth differentiation factor 11 [Source:HGNC Symbol;Acc:HGNC:4216]
ENSG00000135424.19	284.564	1.27823	0.51125	0.00113622	0.00710537	TRUE	3679	ENSG00000135424	protein_coding	12	55684568	55716404	-1	ITGA7	integrin subunit alpha 7 [Source:HGNC Symbol;Acc:HGNC:6143]
ENSG00000135451.13	227.805	-2.58349	0.61483	1.65819e-06	3.78783e-05	TRUE	10024	ENSG00000135451	protein_coding	12	49323236	49331731	1	TROAP	trophinin associated protein [Source:HGNC Symbol;Acc:HGNC:12327]
ENSG00000135454.14	342.959	-2.8666	0.345114	6.9695e-18	4.89195e-15	TRUE	2583	ENSG00000135454	protein_coding	12	57623409	57633239	-1	B4GALNT1	beta-1,4-N-acetyl-galactosaminyltransferase 1 [Source:HGNC Symbol;Acc:HGNC:4117]
ENSG00000135472.9	13.2543	1.57796	1.29682	0.00609347	0.0266147	TRUE	23017	ENSG00000135472	protein_coding	12	49866896	49904217	-1	FAIM2	Fas apoptotic inhibitory molecule 2 [Source:HGNC Symbol;Acc:HGNC:17067]
ENSG00000135476.12	372.744	-2.1983	0.589152	1.20465e-05	0.000190077	TRUE	9700	ENSG00000135476	protein_coding	12	53268299	53293638	1	ESPL1	extra spindle pole bodies like 1, separase [Source:HGNC Symbol;Acc:HGNC:16856]
ENSG00000135540.12	77.9884	-1.12513	0.46975	0.00187072	0.010525	TRUE	57224	ENSG00000135540	protein_coding	6	138422043	138692571	-1	NHSL1	NHS like 1 [Source:HGNC Symbol;Acc:HGNC:21021]
ENSG00000135604.10	10.2873	1.43635	0.696854	0.00273124	0.0141815	TRUE	8676	ENSG00000135604	protein_coding	6	144150517	144191939	1	STX11	syntaxin 11 [Source:HGNC Symbol;Acc:HGNC:11429]
ENSG00000135679.27	1627.9	1.60309	0.23597	9.14116e-13	1.82532e-10	TRUE	4193	ENSG00000135679	protein_coding	12	68808177	68845544	1	MDM2	MDM2 proto-oncogene [Source:HGNC Symbol;Acc:HGNC:6973]
ENSG00000135744.9	26.6013	1.18561	0.58958	0.00391047	0.0187961	TRUE	183	ENSG00000135744	protein_coding	1	230690776	230745576	-1	AGT	angiotensinogen [Source:HGNC Symbol;Acc:HGNC:333]
ENSG00000135749.19	291.654	1.31561	0.270178	1.26214e-07	4.51854e-06	TRUE	80003	ENSG00000135749	protein_coding	1	232983435	233295725	-1	PCNX2	pecanex 2 [Source:HGNC Symbol;Acc:HGNC:8736]
ENSG00000135766.9	1161.08	1.065	0.146644	6.70095e-14	1.80482e-11	TRUE	54583	ENSG00000135766	protein_coding	1	231363751	231422287	-1	EGLN1	egl-9 family hypoxia inducible factor 1 [Source:HGNC Symbol;Acc:HGNC:1232]
ENSG00000135968.22	980.07	1.09317	0.254703	2.77422e-06	5.77871e-05	TRUE	9648	ENSG00000135968	protein_coding	2	108449107	108509415	1	GCC2	GRIP and coiled-coil domain containing 2 [Source:HGNC Symbol;Acc:HGNC:23218]
ENSG00000136048.14	1927.98	1.59241	0.377637	2.32898e-06	4.96741e-05	TRUE	55332	ENSG00000136048	protein_coding	12	101877580	102012130	1	DRAM1	DNA damage regulated autophagy modulator 1 [Source:HGNC Symbol;Acc:HGNC:25645]
ENSG00000136108.15	1236.65	-1.09714	0.432816	0.00147149	0.00870605	TRUE	26586	ENSG00000136108	protein_coding	13	52455429	52476628	1	CKAP2	cytoskeleton associated protein 2 [Source:HGNC Symbol;Acc:HGNC:1990]
ENSG00000136160.17	16.545	-4.53768	0.768186	2.17087e-10	2.1958e-08	TRUE	1910	ENSG00000136160	protein_coding	13	77895481	77975529	-1	EDNRB	endothelin receptor type B [Source:HGNC Symbol;Acc:HGNC:3180]
ENSG00000136167.15	3.65217	-1.82107	1.19844	0.00553158	0.0246685	TRUE	3936	ENSG00000136167	protein_coding	13	46125920	46211871	-1	LCP1	lymphocyte cytosolic protein 1 [Source:HGNC Symbol;Acc:HGNC:6528]
ENSG00000136213.10	406.774	-1.827	0.414959	8.50228e-07	2.24815e-05	TRUE	55501	ENSG00000136213	protein_coding	7	2403588	2448484	1	CHST12	carbohydrate sulfotransferase 12 [Source:HGNC Symbol;Acc:HGNC:17423]
ENSG00000136235.17	3259.82	1.4557	0.244133	2.79953e-10	2.65761e-08	TRUE	10457	ENSG00000136235	protein_coding	7	23235967	23275108	1	GPNMB	glycoprotein nmb [Source:HGNC Symbol;Acc:HGNC:4462]
ENSG00000136490.9	116.158	-1.05337	0.420753	0.00173085	0.00990406	TRUE	80774	ENSG00000136490	protein_coding	17	63695888	63701172	-1	LIMD2	LIM domain containing 2 [Source:HGNC Symbol;Acc:HGNC:28142]
ENSG00000136492.10	277.686	-1.05267	0.45071	0.0026376	0.013788	TRUE	83990	ENSG00000136492	protein_coding	17	61679139	61863559	-1	BRIP1	BRCA1 interacting helicase 1 [Source:HGNC Symbol;Acc:HGNC:20473]
ENSG00000136542.9	9361.83	1.06995	0.337906	0.000283888	0.00238164	TRUE	11227	ENSG00000136542	protein_coding	2	157257705	157318491	1	GALNT5	polypeptide N-acetylgalactosaminyltransferase 5 [Source:HGNC Symbol;Acc:HGNC:4127]
ENSG00000136830.12	6912.54	-1.01626	0.250013	8.71011e-06	0.00014546	TRUE	64855	ENSG00000136830	protein_coding	9	127505339	127578989	-1	NIBAN2	niban apoptosis regulator 2 [Source:HGNC Symbol;Acc:HGNC:25282]
ENSG00000136859.10	927.149	1.12627	0.459747	0.00164536	0.00950171	TRUE	23452	ENSG00000136859	protein_coding	9	127087348	127122635	-1	ANGPTL2	angiopoietin like 2 [Source:HGNC Symbol;Acc:HGNC:490]
ENSG00000136869.16	330.976	2.39233	0.538924	4.58973e-07	1.34743e-05	TRUE	7099	ENSG00000136869	protein_coding	9	117704175	117724735	1	TLR4	toll like receptor 4 [Source:HGNC Symbol;Acc:HGNC:11850]
ENSG00000136943.12	8.37777	-1.4293	0.882945	0.0060067	0.0263261	TRUE	1515	ENSG00000136943	protein_coding	9	97029677	97156556	-1	CTSV	cathepsin V [Source:HGNC Symbol;Acc:HGNC:2538]
ENSG00000136960.13	6900.58	2.85862	0.54762	8.20695e-09	4.5587e-07	TRUE	5168	ENSG00000136960	protein_coding	8	119557086	119673453	-1	ENPP2	ectonucleotide pyrophosphatase/phosphodiesterase 2 [Source:HGNC Symbol;Acc:HGNC:3357]
ENSG00000136999.5	514.335	1.61803	0.83071	0.00243813	0.0129767	TRUE	4856	ENSG00000136999	protein_coding	8	119416446	119424434	1	CCN3	cellular communication network factor 3 [Source:HGNC Symbol;Acc:HGNC:7885]
ENSG00000137135.18	87.0138	-1.39643	0.370372	1.72351e-05	0.000251713	TRUE	84904	ENSG00000137135	protein_coding	9	35658875	35675866	-1	ARHGEF39	Rho guanine nucleotide exchange factor 39 [Source:HGNC Symbol;Acc:HGNC:25909]
ENSG00000137166.17	187.829	-1.52189	0.278529	5.06204e-09	2.99112e-07	TRUE	116113	ENSG00000137166	protein_coding	6	41546381	41602384	1	FOXP4	forkhead box P4 [Source:HGNC Symbol;Acc:HGNC:20842]
ENSG00000137203.15	153.772	-2.6581	0.416097	1.05546e-11	1.61905e-09	TRUE	7020	ENSG00000137203	protein_coding	6	10393186	10419659	-1	TFAP2A	transcription factor AP-2 alpha [Source:HGNC Symbol;Acc:HGNC:11742]
ENSG00000137267.7	1916.45	-1.4068	0.322301	1.40324e-06	3.31778e-05	TRUE	7280	ENSG00000137267	protein_coding	6	3153497	3157544	-1	TUBB2A	tubulin beta 2A class IIa [Source:HGNC Symbol;Acc:HGNC:12412]
ENSG00000137285.11	84.7458	-2.20192	0.777834	0.00024413	0.00211948	TRUE	347733	ENSG00000137285	protein_coding	6	3223324	3231730	-1	TUBB2B	tubulin beta 2B class IIb [Source:HGNC Symbol;Acc:HGNC:30829]
ENSG00000137310.12	925.131	-2.00919	0.411621	8.01103e-08	3.1239e-06	TRUE	6941	ENSG00000137310	protein_coding	6	31158547	31167159	1	TCF19	transcription factor 19 [Source:HGNC Symbol;Acc:HGNC:11629]
ENSG00000137414.7	876.259	1.70308	0.23486	3.53628e-14	9.98913e-12	TRUE	51439	ENSG00000137414	protein_coding	6	17600302	17611719	1	FAM8A1	family with sequence similarity 8 member A1 [Source:HGNC Symbol;Acc:HGNC:16372]
ENSG00000137460.10	29.099	-1.42434	0.589715	0.00127016	0.00778121	TRUE	85462	ENSG00000137460	protein_coding	4	152936323	152979671	1	FHDC1	FH2 domain containing 1 [Source:HGNC Symbol;Acc:HGNC:29363]
ENSG00000137463.5	166.48	2.03699	0.811099	0.000509867	0.00376957	TRUE	84709	ENSG00000137463	protein_coding	4	139266165	139280225	-1	MGARP	mitochondria localized glutamic acid rich protein [Source:HGNC Symbol;Acc:HGNC:29969]
ENSG00000137501.18	454.695	1.14666	0.497389	0.00224211	0.0121369	TRUE	54843	ENSG00000137501	protein_coding	11	85694224	85811159	-1	SYTL2	synaptotagmin like 2 [Source:HGNC Symbol;Acc:HGNC:15585]
ENSG00000137507.11	482.681	2.07129	0.503114	2.2021e-06	4.74573e-05	TRUE	2615	ENSG00000137507	protein_coding	11	76657524	76670747	-1	LRRC32	leucine rich repeat containing 32 [Source:HGNC Symbol;Acc:HGNC:4161]
ENSG00000137628.18	146.314	1.31959	0.403401	0.000108155	0.0011007	TRUE	55601	ENSG00000137628	protein_coding	4	168216291	168318883	-1	DDX60	DExD/H-box helicase 60 [Source:HGNC Symbol;Acc:HGNC:25942]
ENSG00000137675.5	7.71819	3.02733	1.61831	0.00146654	0.00868563	TRUE	64066	ENSG00000137675	protein_coding	11	102691487	102705769	-1	MMP27	matrix metallopeptidase 27 [Source:HGNC Symbol;Acc:HGNC:14250]
ENSG00000137752.24	50.3012	2.51225	0.627696	3.10577e-06	6.32153e-05	TRUE	834	ENSG00000137752	protein_coding	11	105025443	105035250	-1	CASP1	caspase 1 [Source:HGNC Symbol;Acc:HGNC:1499]
ENSG00000137804.14	956.718	-2.36884	0.546947	9.4318e-07	2.43555e-05	TRUE	51203	ENSG00000137804	protein_coding	15	41320794	41381050	1	NUSAP1	nucleolar and spindle associated protein 1 [Source:HGNC Symbol;Acc:HGNC:18538]
ENSG00000137807.16	1451	-1.69635	0.409978	2.96918e-06	6.10249e-05	TRUE	9493	ENSG00000137807	protein_coding	15	69414246	69448427	1	KIF23	kinesin family member 23 [Source:HGNC Symbol;Acc:HGNC:6392]
ENSG00000137812.21	570.803	-1.25093	0.520074	0.00161597	0.00937645	TRUE	57082	ENSG00000137812	protein_coding	15	40594020	40664342	1	KNL1	kinetochore scaffold 1 [Source:HGNC Symbol;Acc:HGNC:24054]
ENSG00000137819.14	244.171	1.8418	0.454989	3.48361e-06	6.94413e-05	TRUE	54852	ENSG00000137819	protein_coding	15	69298912	69407780	1	PAQR5	progestin and adipoQ receptor family member 5 [Source:HGNC Symbol;Acc:HGNC:29645]
ENSG00000137841.12	7.468	-1.40917	0.733489	0.00352242	0.0172421	TRUE	5330	ENSG00000137841	protein_coding	15	40278176	40307935	-1	PLCB2	phospholipase C beta 2 [Source:HGNC Symbol;Acc:HGNC:9055]
ENSG00000137871.21	569.935	1.02647	0.183645	4.06655e-09	2.47227e-07	TRUE	54816	ENSG00000137871	protein_coding	15	56630176	56734086	-1	ZNF280D	zinc finger protein 280D [Source:HGNC Symbol;Acc:HGNC:25953]
ENSG00000137962.13	3211.48	2.10938	0.455557	2.29741e-07	7.51337e-06	TRUE	9411	ENSG00000137962	protein_coding	1	94148988	94275068	-1	ARHGAP29	Rho GTPase activating protein 29 [Source:HGNC Symbol;Acc:HGNC:30207]
ENSG00000137970.7	1077.05	1.89218	0.521426	1.81378e-05	0.000261923	TRUE	NA	ENSG00000137970	processed_pseudogene	1	96678874	96679620	-1	RPL7P9	ribosomal protein L7 pseudogene 9 [Source:HGNC Symbol;Acc:HGNC:37028]
ENSG00000137975.8	12.0749	1.80754	0.792721	0.00106666	0.00676905	TRUE	9635	ENSG00000137975	protein_coding	1	86424171	86456553	1	CLCA2	chloride channel accessory 2 [Source:HGNC Symbol;Acc:HGNC:2016]
ENSG00000138079.14	3.34078	1.44099	0.95184	0.00803807	0.0330117	TRUE	6519	ENSG00000138079	protein_coding	2	44275458	44321494	1	SLC3A1	solute carrier family 3 member 1 [Source:HGNC Symbol;Acc:HGNC:11025]
ENSG00000138080.14	3152.23	-1.42933	0.365628	9.62605e-06	0.000157352	TRUE	11117	ENSG00000138080	protein_coding	2	27078615	27086403	1	EMILIN1	elastin microfibril interfacer 1 [Source:HGNC Symbol;Acc:HGNC:19880]
ENSG00000138092.11	673.674	-1.30285	0.339011	1.44203e-05	0.00021979	TRUE	79172	ENSG00000138092	protein_coding	2	24793136	24822376	1	CENPO	centromere protein O [Source:HGNC Symbol;Acc:HGNC:28152]
ENSG00000138131.4	2714.12	1.13849	0.787151	0.0101255	0.0393649	TRUE	84171	ENSG00000138131	protein_coding	10	98247690	98268194	-1	LOXL4	lysyl oxidase like 4 [Source:HGNC Symbol;Acc:HGNC:17171]
ENSG00000138160.7	824.747	-1.39072	0.512546	0.000604083	0.00430402	TRUE	3832	ENSG00000138160	protein_coding	10	92574105	92655395	1	KIF11	kinesin family member 11 [Source:HGNC Symbol;Acc:HGNC:6388]
ENSG00000138180.16	979.166	-2.03041	0.592447	3.93006e-05	0.000487214	TRUE	55165	ENSG00000138180	protein_coding	10	93496612	93529092	1	CEP55	centrosomal protein 55 [Source:HGNC Symbol;Acc:HGNC:1161]
ENSG00000138182.15	491.881	-1.14968	0.526198	0.00314867	0.0158206	TRUE	9585	ENSG00000138182	protein_coding	10	89701590	89774939	1	KIF20B	kinesin family member 20B [Source:HGNC Symbol;Acc:HGNC:7212]
ENSG00000138346.15	106.881	-1.10526	0.339476	0.000164831	0.00154075	TRUE	1763	ENSG00000138346	protein_coding	10	68414064	68472121	-1	DNA2	DNA replication helicase/nuclease 2 [Source:HGNC Symbol;Acc:HGNC:2939]
ENSG00000138356.14	872.011	1.7857	0.548671	7.09361e-05	0.000779086	TRUE	316	ENSG00000138356	protein_coding	2	200586014	200677064	1	AOX1	aldehyde oxidase 1 [Source:HGNC Symbol;Acc:HGNC:553]
ENSG00000138376.11	211.699	-1.47397	0.360024	4.20048e-06	8.07547e-05	TRUE	580	ENSG00000138376	protein_coding	2	214725646	214809683	-1	BARD1	BRCA1 associated RING domain 1 [Source:HGNC Symbol;Acc:HGNC:952]
ENSG00000138378.19	43.6534	1.56513	0.459673	5.21319e-05	0.000612338	TRUE	6775	ENSG00000138378	protein_coding	2	191029576	191151596	-1	STAT4	signal transducer and activator of transcription 4 [Source:HGNC Symbol;Acc:HGNC:11365]
ENSG00000138379.5	160.976	3.92694	1.20015	2.86409e-05	0.000381929	TRUE	2660	ENSG00000138379	protein_coding	2	190055700	190062729	-1	MSTN	myostatin [Source:HGNC Symbol;Acc:HGNC:4223]
ENSG00000138411.13	557.035	1.22224	0.35203	6.02759e-05	0.000689127	TRUE	57520	ENSG00000138411	protein_coding	2	196189099	196593684	-1	HECW2	HECT, C2 and WW domain containing E3 ubiquitin protein ligase 2 [Source:HGNC Symbol;Acc:HGNC:29853]
ENSG00000138439.12	50.5572	1.26646	0.285775	1.04646e-06	2.66364e-05	TRUE	150864	ENSG00000138439	protein_coding	2	202634969	202769757	1	FAM117B	family with sequence similarity 117 member B [Source:HGNC Symbol;Acc:HGNC:14440]
ENSG00000138495.7	243.211	-1.13579	0.284554	9.97257e-06	0.000161874	TRUE	10063	ENSG00000138495	protein_coding	3	119654513	119677454	-1	COX17	cytochrome c oxidase copper chaperone COX17 [Source:HGNC Symbol;Acc:HGNC:2264]
ENSG00000138623.10	5780.16	-1.04954	0.441884	0.0023622	0.0126627	TRUE	8482	ENSG00000138623	protein_coding	15	74409289	74433958	-1	SEMA7A	semaphorin 7A (John Milton Hagen blood group) [Source:HGNC Symbol;Acc:HGNC:10741]
ENSG00000138669.10	150.06	4.99119	1.17537	5.407e-07	1.53295e-05	TRUE	5593	ENSG00000138669	protein_coding	4	81087370	81215222	-1	PRKG2	protein kinase cGMP-dependent 2 [Source:HGNC Symbol;Acc:HGNC:9416]
ENSG00000138756.19	1150.37	1.12124	0.326113	8.18206e-05	0.00087904	TRUE	55589	ENSG00000138756	protein_coding	4	78776342	78916365	1	BMP2K	BMP2 inducible kinase [Source:HGNC Symbol;Acc:HGNC:18041]
ENSG00000138758.12	18084.9	1.00799	0.254839	1.66779e-05	0.000245121	TRUE	55752	ENSG00000138758	protein_coding	4	76949751	77040384	1	SEPTIN11	septin 11 [Source:HGNC Symbol;Acc:HGNC:25589]
ENSG00000138778.14	692.064	-1.17999	0.601133	0.00471241	0.0217005	TRUE	1062	ENSG00000138778	protein_coding	4	103105349	103198445	-1	CENPE	centromere protein E [Source:HGNC Symbol;Acc:HGNC:1856]
ENSG00000138821.14	37.0571	1.08242	0.51588	0.00408369	0.0194591	TRUE	64116	ENSG00000138821	protein_coding	4	102251080	102431258	-1	SLC39A8	solute carrier family 39 member 8 [Source:HGNC Symbol;Acc:HGNC:20862]
ENSG00000138829.12	4814.17	-2.06869	0.583644	2.29232e-05	0.000316807	TRUE	2201	ENSG00000138829	protein_coding	5	128257909	128659185	-1	FBN2	fibrillin 2 [Source:HGNC Symbol;Acc:HGNC:3604]
ENSG00000139117.14	92.1977	2.76079	0.35453	4.00216e-16	1.68549e-13	TRUE	144402	ENSG00000139117	protein_coding	12	38646822	38907430	-1	CPNE8	copine 8 [Source:HGNC Symbol;Acc:HGNC:23498]
ENSG00000139200.14	40.5505	-1.28027	0.629868	0.0035933	0.0175447	TRUE	196500	ENSG00000139200	protein_coding	12	6693791	6700815	-1	PIANP	PILR alpha associated neural protein [Source:HGNC Symbol;Acc:HGNC:25338]
ENSG00000139263.12	517.865	1.45353	0.427758	6.0033e-05	0.000688048	TRUE	121227	ENSG00000139263	protein_coding	12	58872149	58920504	-1	LRIG3	leucine rich repeats and immunoglobulin like domains 3 [Source:HGNC Symbol;Acc:HGNC:30991]
ENSG00000139329.5	18871.5	1.1672	0.53001	0.00295812	0.0150751	TRUE	4060	ENSG00000139329	protein_coding	12	91102629	91111494	-1	LUM	lumican [Source:HGNC Symbol;Acc:HGNC:6724]
ENSG00000139508.15	120.748	1.76336	0.31609	2.05759e-09	1.4059e-07	TRUE	283537	ENSG00000139508	protein_coding	13	28700064	28718970	-1	SLC46A3	solute carrier family 46 member 3 [Source:HGNC Symbol;Acc:HGNC:27501]
ENSG00000139567.13	582.528	1.05271	0.316889	0.000135765	0.0013191	TRUE	94	ENSG00000139567	protein_coding	12	51906908	51923361	1	ACVRL1	activin A receptor like type 1 [Source:HGNC Symbol;Acc:HGNC:175]
ENSG00000139597.18	51.3486	2.7725	0.446842	2.97326e-11	3.89944e-09	TRUE	90634	ENSG00000139597	protein_coding	13	32400723	32428311	-1	N4BP2L1	NEDD4 binding protein 2 like 1 [Source:HGNC Symbol;Acc:HGNC:25037]
ENSG00000139618.17	212.757	-1.1369	0.540685	0.0038217	0.0184767	TRUE	675	ENSG00000139618	protein_coding	13	32315086	32400268	1	BRCA2	BRCA2 DNA repair associated [Source:HGNC Symbol;Acc:HGNC:1101]
ENSG00000139637.14	306.952	-1.13506	0.308907	3.49958e-05	0.000444169	TRUE	60314	ENSG00000139637	protein_coding	12	53299695	53307177	1	MYG1	MYG1 exonuclease [Source:HGNC Symbol;Acc:HGNC:17590]
ENSG00000139679.16	97.7968	1.93353	0.310083	3.36111e-11	4.32519e-09	TRUE	10161	ENSG00000139679	protein_coding	13	48389567	48444704	-1	LPAR6	lysophosphatidic acid receptor 6 [Source:HGNC Symbol;Acc:HGNC:15520]
ENSG00000139826.6	293.78	1.1639	0.146256	2.78319e-16	1.23066e-13	TRUE	84945	ENSG00000139826	protein_coding	13	108218392	108234243	1	ABHD13	abhydrolase domain containing 13 [Source:HGNC Symbol;Acc:HGNC:20293]
ENSG00000139874.6	1045.29	-1.26481	0.382365	0.000109942	0.00111471	TRUE	6751	ENSG00000139874	protein_coding	14	38207904	38213067	1	SSTR1	somatostatin receptor 1 [Source:HGNC Symbol;Acc:HGNC:11330]
ENSG00000139880.21	126.151	-1.73977	0.300307	6.42309e-10	5.44975e-08	TRUE	64403	ENSG00000139880	protein_coding	14	23047062	23057538	-1	CDH24	cadherin 24 [Source:HGNC Symbol;Acc:HGNC:14265]
ENSG00000139910.20	31.1118	2.35323	1.04888	0.000758161	0.00514089	TRUE	4857	ENSG00000139910	protein_coding	14	26443090	26598033	-1	NOVA1	NOVA alternative splicing regulator 1 [Source:HGNC Symbol;Acc:HGNC:7886]
ENSG00000139974.16	152.339	1.06618	0.203722	2.74731e-08	1.29079e-06	TRUE	145389	ENSG00000139974	protein_coding	14	60981114	61083733	1	SLC38A6	solute carrier family 38 member 6 [Source:HGNC Symbol;Acc:HGNC:19863]
ENSG00000139977.14	448.013	1.01475	0.145591	5.78543e-13	1.21825e-10	TRUE	122830	ENSG00000139977	protein_coding	14	57390544	57415906	1	NAA30	N-alpha-acetyltransferase 30, NatC catalytic subunit [Source:HGNC Symbol;Acc:HGNC:19844]
ENSG00000139998.16	366.556	-1.51326	0.308524	9.85009e-08	3.69785e-06	TRUE	376267	ENSG00000139998	protein_coding	14	64945814	64973226	-1	RAB15	RAB15, member RAS oncogene family [Source:HGNC Symbol;Acc:HGNC:20150]
ENSG00000140030.6	6.41543	4.00539	1.85861	0.00058024	0.00417524	TRUE	8477	ENSG00000140030	protein_coding	14	88005135	88014811	1	GPR65	G protein-coupled receptor 65 [Source:HGNC Symbol;Acc:HGNC:4517]
ENSG00000140451.13	175.809	-1.37271	0.402526	6.90798e-05	0.000764498	TRUE	80119	ENSG00000140451	protein_coding	15	64815632	64825668	-1	PIF1	PIF1 5'-to-3' DNA helicase [Source:HGNC Symbol;Acc:HGNC:26220]
ENSG00000140525.19	773.976	-1.35302	0.400401	7.745e-05	0.000839483	TRUE	55215	ENSG00000140525	protein_coding	15	89243945	89317261	1	FANCI	FA complementation group I [Source:HGNC Symbol;Acc:HGNC:25568]
ENSG00000140534.14	252.924	-1.32294	0.224224	4.78862e-10	4.23354e-08	TRUE	90381	ENSG00000140534	protein_coding	15	89575469	89631056	1	TICRR	TOPBP1 interacting checkpoint and replication regulator [Source:HGNC Symbol;Acc:HGNC:28704]
ENSG00000140564.13	1954.01	-1.20152	0.304264	9.46931e-06	0.000155146	TRUE	5045	ENSG00000140564	protein_coding	15	90868588	90883564	1	FURIN	furin, paired basic amino acid cleaving enzyme [Source:HGNC Symbol;Acc:HGNC:8568]
ENSG00000140807.7	47.2301	-3.79984	0.925109	2.34693e-07	7.65285e-06	TRUE	85407	ENSG00000140807	protein_coding	16	50548396	50649249	1	NKD1	NKD inhibitor of WNT signaling pathway 1 [Source:HGNC Symbol;Acc:HGNC:17045]
ENSG00000140859.16	616.458	-1.04731	0.290847	5.34925e-05	0.000626414	TRUE	3801	ENSG00000140859	protein_coding	16	57758217	57863053	-1	KIFC3	kinesin family member C3 [Source:HGNC Symbol;Acc:HGNC:6326]
ENSG00000140961.14	55.7812	-1.14993	0.387049	0.000395979	0.00309344	TRUE	29948	ENSG00000140961	protein_coding	16	83931311	83966332	1	OSGIN1	oxidative stress induced growth inhibitor 1 [Source:HGNC Symbol;Acc:HGNC:30093]
ENSG00000140983.14	616.234	-1.03331	0.325804	0.000248571	0.00214597	TRUE	89941	ENSG00000140983	protein_coding	16	668105	674174	1	RHOT2	ras homolog family member T2 [Source:HGNC Symbol;Acc:HGNC:21169]
ENSG00000140988.16	10549.3	-1.00772	0.245429	7.28526e-06	0.000125744	TRUE	6187	ENSG00000140988	protein_coding	16	1962058	1964841	-1	RPS2	ribosomal protein S2 [Source:HGNC Symbol;Acc:HGNC:10404]
ENSG00000141338.15	50.6981	1.67302	0.66357	0.00067002	0.00466453	TRUE	10351	ENSG00000141338	protein_coding	17	68867289	68955392	-1	ABCA8	ATP binding cassette subfamily A member 8 [Source:HGNC Symbol;Acc:HGNC:38]
ENSG00000141376.23	315.932	1.18019	0.253426	4.11109e-07	1.22871e-05	TRUE	54828	ENSG00000141376	protein_coding	17	60677453	61392838	1	BCAS3	BCAS3 microtubule associated cell migration factor [Source:HGNC Symbol;Acc:HGNC:14347]
ENSG00000141499.17	176.356	-1.37746	0.324909	2.46533e-06	5.18661e-05	TRUE	55135	ENSG00000141499	protein_coding	17	7686071	7703502	1	WRAP53	WD repeat containing antisense to TP53 [Source:HGNC Symbol;Acc:HGNC:25522]
ENSG00000141522.12	3991.79	-1.12224	0.305196	3.48385e-05	0.000442657	TRUE	396	ENSG00000141522	protein_coding	17	81867721	81871378	-1	ARHGDIA	Rho GDP dissociation inhibitor alpha [Source:HGNC Symbol;Acc:HGNC:678]
ENSG00000141526.18	4236.1	-1.07939	0.373308	0.000552992	0.00401786	TRUE	9123	ENSG00000141526	protein_coding	17	82217934	82261129	1	SLC16A3	solute carrier family 16 member 3 [Source:HGNC Symbol;Acc:HGNC:10924]
ENSG00000141552.18	595.61	-1.09152	0.374072	0.000504649	0.00373826	TRUE	51529	ENSG00000141552	protein_coding	17	81890790	81900991	1	ANAPC11	anaphase promoting complex subunit 11 [Source:HGNC Symbol;Acc:HGNC:14452]
ENSG00000141574.8	56.8872	1.26889	0.662885	0.00412555	0.0196101	TRUE	6398	ENSG00000141574	protein_coding	17	82321024	82334074	-1	SECTM1	secreted and transmembrane 1 [Source:HGNC Symbol;Acc:HGNC:10707]
ENSG00000141577.14	98.6098	-1.76121	0.425669	3.01309e-06	6.16342e-05	TRUE	22994	ENSG00000141577	protein_coding	17	81189593	81222999	-1	CEP131	centrosomal protein 131 [Source:HGNC Symbol;Acc:HGNC:29511]
ENSG00000141682.12	102.312	-1.08069	0.392904	0.000840429	0.00555086	TRUE	5366	ENSG00000141682	protein_coding	18	59899996	59904305	1	PMAIP1	phorbol-12-myristate-13-acetate-induced protein 1 [Source:HGNC Symbol;Acc:HGNC:9108]
ENSG00000141696.13	1395.72	-1.00942	0.298259	0.000123863	0.00122609	TRUE	10609	ENSG00000141696	protein_coding	17	41801947	41812604	-1	P3H4	prolyl 3-hydroxylase family member 4 (inactive) [Source:HGNC Symbol;Acc:HGNC:16946]
ENSG00000141858.12	346.556	-1.04427	0.267291	1.61534e-05	0.00023954	TRUE	90378	ENSG00000141858	protein_coding	19	14087851	14091036	-1	SAMD1	sterile alpha motif domain containing 1 [Source:HGNC Symbol;Acc:HGNC:17958]
ENSG00000141933.9	28.8882	-2.65856	0.573296	2.52184e-07	8.16972e-06	TRUE	91978	ENSG00000141933	protein_coding	19	507497	519654	1	TPGS1	tubulin polyglutamylase complex subunit 1 [Source:HGNC Symbol;Acc:HGNC:25058]
ENSG00000142166.13	1433	1.33038	0.140432	3.34793e-22	6.92212e-19	TRUE	3454	ENSG00000142166	protein_coding	21	33324429	33359864	1	IFNAR1	interferon alpha and beta receptor subunit 1 [Source:HGNC Symbol;Acc:HGNC:5432]
ENSG00000142330.20	145.966	-1.49482	0.316239	2.55723e-07	8.24973e-06	TRUE	11132	ENSG00000142330	protein_coding	2	240586734	240617705	1	CAPN10	calpain 10 [Source:HGNC Symbol;Acc:HGNC:1477]
ENSG00000142409.6	110.334	-1.0789	0.408551	0.00117725	0.0073184	TRUE	126208	ENSG00000142409	protein_coding	19	56087366	56121295	-1	ZNF787	zinc finger protein 787 [Source:HGNC Symbol;Acc:HGNC:26998]
ENSG00000142494.13	6.02156	3.53342	1.15533	0.000141071	0.0013553	TRUE	55244	ENSG00000142494	protein_coding	17	19495385	19579034	1	SLC47A1	solute carrier family 47 member 1 [Source:HGNC Symbol;Acc:HGNC:25588]
ENSG00000142552.8	4139.91	-1.37638	0.31771	1.66319e-06	3.79551e-05	TRUE	57333	ENSG00000142552	protein_coding	19	49528003	49546962	1	RCN3	reticulocalbin 3 [Source:HGNC Symbol;Acc:HGNC:21145]
ENSG00000142611.17	13.8426	-2.20515	0.927388	0.000850713	0.00561398	TRUE	63976	ENSG00000142611	protein_coding	1	3069168	3438621	1	PRDM16	PR/SET domain 16 [Source:HGNC Symbol;Acc:HGNC:14000]
ENSG00000142632.17	147.984	-1.14852	0.399386	0.000520218	0.00382776	TRUE	128272	ENSG00000142632	protein_coding	1	16197854	16212652	-1	ARHGEF19	Rho guanine nucleotide exchange factor 19 [Source:HGNC Symbol;Acc:HGNC:26604]
ENSG00000142694.7	238.026	-1.53933	0.546907	0.000395606	0.00309225	TRUE	55194	ENSG00000142694	protein_coding	1	36322030	36324154	-1	EVA1B	eva-1 homolog B [Source:HGNC Symbol;Acc:HGNC:25558]
ENSG00000142731.11	281.585	-1.61124	0.479225	6.51903e-05	0.000733278	TRUE	10733	ENSG00000142731	protein_coding	4	127880893	127899224	1	PLK4	polo like kinase 4 [Source:HGNC Symbol;Acc:HGNC:11397]
ENSG00000142945.13	759.822	-2.40888	0.489084	5.64241e-08	2.31319e-06	TRUE	11004	ENSG00000142945	protein_coding	1	44739818	44767767	1	KIF2C	kinesin family member 2C [Source:HGNC Symbol;Acc:HGNC:6393]
ENSG00000143061.18	14.276	2.35514	0.916249	0.000438921	0.00335757	TRUE	3321	ENSG00000143061	protein_coding	1	116574399	116667755	-1	IGSF3	immunoglobulin superfamily member 3 [Source:HGNC Symbol;Acc:HGNC:5950]
ENSG00000143162.9	500.926	1.56436	0.266718	4.30455e-10	3.87963e-08	TRUE	8804	ENSG00000143162	protein_coding	1	167529117	167553805	-1	CREG1	cellular repressor of E1A stimulated genes 1 [Source:HGNC Symbol;Acc:HGNC:2351]
ENSG00000143196.5	970.945	1.26999	0.849308	0.00751715	0.0313767	TRUE	1805	ENSG00000143196	protein_coding	1	168695468	168729206	-1	DPT	dermatopontin [Source:HGNC Symbol;Acc:HGNC:3011]
ENSG00000143228.13	313.622	-1.74663	0.670393	0.000584637	0.00420114	TRUE	83540	ENSG00000143228	protein_coding	1	163266576	163355764	1	NUF2	NUF2 component of NDC80 kinetochore complex [Source:HGNC Symbol;Acc:HGNC:14621]
ENSG00000143333.7	99.4152	-4.65625	0.728218	8.59576e-12	1.36372e-09	TRUE	6004	ENSG00000143333	protein_coding	1	182598623	182604389	-1	RGS16	regulator of G protein signaling 16 [Source:HGNC Symbol;Acc:HGNC:9997]
ENSG00000143344.16	506.513	1.06766	0.176452	2.40813e-10	2.3736e-08	TRUE	23179	ENSG00000143344	protein_coding	1	183636085	183928532	1	RGL1	ral guanine nucleotide dissociation stimulator like 1 [Source:HGNC Symbol;Acc:HGNC:30281]
ENSG00000143353.12	105.887	1.33794	0.276187	1.386e-07	4.89387e-06	TRUE	127018	ENSG00000143353	protein_coding	1	219173869	219212865	1	LYPLAL1	lysophospholipase like 1 [Source:HGNC Symbol;Acc:HGNC:20440]
ENSG00000143387.14	3663.09	1.33681	0.354552	1.77397e-05	0.000256976	TRUE	1513	ENSG00000143387	protein_coding	1	150794880	150809577	-1	CTSK	cathepsin K [Source:HGNC Symbol;Acc:HGNC:2536]
ENSG00000143401.15	1222.57	-1.20497	0.314153	1.67839e-05	0.00024621	TRUE	81611	ENSG00000143401	protein_coding	1	150218417	150236156	-1	ANP32E	acidic nuclear phosphoprotein 32 family member E [Source:HGNC Symbol;Acc:HGNC:16673]
ENSG00000143476.18	418.429	-1.95566	0.474257	2.74814e-06	5.72954e-05	TRUE	51514	ENSG00000143476	protein_coding	1	212035553	212107400	1	DTL	denticleless E3 ubiquitin protein ligase homolog [Source:HGNC Symbol;Acc:HGNC:30288]
ENSG00000143502.16	11.5418	-2.2569	0.693468	5.58336e-05	0.00064967	TRUE	55061	ENSG00000143502	protein_coding	1	223220819	223364233	-1	SUSD4	sushi domain containing 4 [Source:HGNC Symbol;Acc:HGNC:25470]
ENSG00000143774.17	2079.1	-1.34735	0.359864	2.02439e-05	0.000285572	TRUE	2987	ENSG00000143774	protein_coding	1	228139962	228148984	1	GUK1	guanylate kinase 1 [Source:HGNC Symbol;Acc:HGNC:4693]
ENSG00000143793.13	125.374	-1.4287	0.275957	2.78452e-08	1.30563e-06	TRUE	79169	ENSG00000143793	protein_coding	1	228100726	228105411	-1	C1orf35	chromosome 1 open reading frame 35 [Source:HGNC Symbol;Acc:HGNC:19032]
ENSG00000143801.18	131.063	1.16684	0.400329	0.000422633	0.00325909	TRUE	5664	ENSG00000143801	protein_coding	1	226870184	226927726	1	PSEN2	presenilin 2 [Source:HGNC Symbol;Acc:HGNC:9509]
ENSG00000143850.16	80.5933	1.06785	0.751785	0.0119858	0.0447786	TRUE	22874	ENSG00000143850	protein_coding	1	204218853	204377665	-1	PLEKHA6	pleckstrin homology domain containing A6 [Source:HGNC Symbol;Acc:HGNC:17053]
ENSG00000144063.4	3281.87	-1.60345	0.779509	0.00232538	0.0125072	TRUE	7851	ENSG00000144063	protein_coding	2	110083870	110116022	-1	MALL	mal, T cell differentiation protein like [Source:HGNC Symbol;Acc:HGNC:6818]
ENSG00000144158.4	12.043	-1.76365	0.732277	0.000980431	0.00631177	TRUE	NA	ENSG00000144158	processed_pseudogene	2	113657908	113658675	1	SNRPA1P1	SNRPA1 pseudogene 1 [Source:HGNC Symbol;Acc:HGNC:54744]
ENSG00000144285.23	120.775	9.69329	2.35296	2.23793e-07	7.3528e-06	TRUE	6323	ENSG00000144285	protein_coding	2	165984641	166149214	-1	SCN1A	sodium voltage-gated channel alpha subunit 1 [Source:HGNC Symbol;Acc:HGNC:10585]
ENSG00000144355.15	114.992	-2.40505	0.487098	4.58573e-08	1.94185e-06	TRUE	1745	ENSG00000144355	protein_coding	2	172084740	172089677	1	DLX1	distal-less homeobox 1 [Source:HGNC Symbol;Acc:HGNC:2914]
ENSG00000144362.12	18.5627	1.49113	0.377545	7.22306e-06	0.000125137	TRUE	493911	ENSG00000144362	protein_coding	2	169694454	169701708	1	PHOSPHO2	phosphatase, orphan 2 [Source:HGNC Symbol;Acc:HGNC:28316]
ENSG00000144369.14	575.393	1.83644	0.523602	2.8473e-05	0.000380127	TRUE	165215	ENSG00000144369	protein_coding	2	186694060	186765959	1	FAM171B	family with sequence similarity 171 member B [Source:HGNC Symbol;Acc:HGNC:29412]
ENSG00000144395.18	67.0305	-1.17295	0.313207	2.66747e-05	0.000359852	TRUE	284992	ENSG00000144395	protein_coding	2	196639554	196763490	1	CCDC150	coiled-coil domain containing 150 [Source:HGNC Symbol;Acc:HGNC:26834]
ENSG00000144554.13	220.841	-1.4656	0.505762	0.000329819	0.0026768	TRUE	2177	ENSG00000144554	protein_coding	3	10026370	10101932	1	FANCD2	FA complementation group D2 [Source:HGNC Symbol;Acc:HGNC:3585]
ENSG00000144681.11	198.314	1.10364	0.533255	0.00398555	0.0190896	TRUE	6769	ENSG00000144681	protein_coding	3	36380503	36548007	1	STAC	SH3 and cysteine rich domain [Source:HGNC Symbol;Acc:HGNC:11353]
ENSG00000144724.20	1018.12	1.05416	0.136393	1.96374e-15	6.99785e-13	TRUE	5793	ENSG00000144724	protein_coding	3	61561569	62297609	1	PTPRG	protein tyrosine phosphatase receptor type G [Source:HGNC Symbol;Acc:HGNC:9671]
ENSG00000144730.19	57.7093	1.31539	0.442977	0.000295207	0.00245613	TRUE	54756	ENSG00000144730	protein_coding	3	57089982	57170306	-1	IL17RD	interleukin 17 receptor D [Source:HGNC Symbol;Acc:HGNC:17616]
ENSG00000144785.8	132.512	-5.25972	0.55425	3.58613e-22	6.92212e-19	TRUE	NA	ENSG00000144785	protein_coding	12	56285916	56316059	-1		novel protein
ENSG00000144810.16	18928.7	1.07593	0.746426	0.0131958	0.0482864	TRUE	1295	ENSG00000144810	protein_coding	3	99638475	99799226	1	COL8A1	collagen type VIII alpha 1 chain [Source:HGNC Symbol;Acc:HGNC:2215]
ENSG00000144821.11	16.8401	-1.84172	0.839065	0.00153713	0.00900469	TRUE	22989	ENSG00000144821	protein_coding	3	108380368	108529322	-1	MYH15	myosin heavy chain 15 [Source:HGNC Symbol;Acc:HGNC:31073]
ENSG00000144893.13	12.7201	1.99359	0.854984	0.000590009	0.00422323	TRUE	116931	ENSG00000144893	protein_coding	3	151085286	151437072	1	MED12L	mediator complex subunit 12L [Source:HGNC Symbol;Acc:HGNC:16050]
ENSG00000145040.4	44.0348	-1.59587	0.799775	0.00253369	0.0133471	TRUE	90226	ENSG00000145040	protein_coding	3	48561718	48563781	-1	UCN2	urocortin 2 [Source:HGNC Symbol;Acc:HGNC:18414]
ENSG00000145087.13	4.64399	-4.64739	1.73483	0.000279984	0.00235622	TRUE	9515	ENSG00000145087	protein_coding	3	120908072	121424761	1	STXBP5L	syntaxin binding protein 5L [Source:HGNC Symbol;Acc:HGNC:30757]
ENSG00000145214.14	239.945	-1.13097	0.401024	0.000640652	0.00450909	TRUE	1609	ENSG00000145214	protein_coding	4	958887	986895	-1	DGKQ	diacylglycerol kinase theta [Source:HGNC Symbol;Acc:HGNC:2856]
ENSG00000145348.17	633.446	1.22377	0.240231	4.54723e-08	1.93261e-06	TRUE	93627	ENSG00000145348	protein_coding	4	106041599	106316683	-1	TBCK	TBC1 domain containing kinase [Source:HGNC Symbol;Acc:HGNC:28261]
ENSG00000145362.21	476.062	1.86255	0.301613	4.97836e-11	6.06915e-09	TRUE	287	ENSG00000145362	protein_coding	4	112818032	113384221	1	ANK2	ankyrin 2 [Source:HGNC Symbol;Acc:HGNC:493]
ENSG00000145386.11	878.727	-1.19088	0.424522	0.000601063	0.00429244	TRUE	890	ENSG00000145386	protein_coding	4	121816444	121823883	-1	CCNA2	cyclin A2 [Source:HGNC Symbol;Acc:HGNC:1578]
ENSG00000145390.12	1048.15	1.83358	0.291588	2.82852e-11	3.78711e-09	TRUE	54532	ENSG00000145390	protein_coding	4	119212587	119295518	1	USP53	ubiquitin specific peptidase 53 [Source:HGNC Symbol;Acc:HGNC:29255]
ENSG00000145494.12	347.685	-1.06751	0.241493	1.70815e-06	3.85633e-05	TRUE	4726	ENSG00000145494	protein_coding	5	1801407	1816048	1	NDUFS6	NADH:ubiquinone oxidoreductase subunit S6 [Source:HGNC Symbol;Acc:HGNC:7713]
ENSG00000145555.15	3675.5	-1.15932	0.279988	4.82985e-06	9.02937e-05	TRUE	4651	ENSG00000145555	protein_coding	5	16661907	16936288	-1	MYO10	myosin X [Source:HGNC Symbol;Acc:HGNC:7593]
ENSG00000145779.8	227.083	1.08874	0.340268	0.000193142	0.00174756	TRUE	25816	ENSG00000145779	protein_coding	5	119268692	119399688	1	TNFAIP8	TNF alpha induced protein 8 [Source:HGNC Symbol;Acc:HGNC:17260]
ENSG00000145780.8	602.836	1.21375	0.139736	5.59822e-19	6.48358e-16	TRUE	56929	ENSG00000145780	protein_coding	5	115520908	115544775	-1	FEM1C	fem-1 homolog C [Source:HGNC Symbol;Acc:HGNC:16933]
ENSG00000145912.9	583.472	-1.18844	0.24075	1.19459e-07	4.31675e-06	TRUE	55651	ENSG00000145912	protein_coding	5	178149463	178153894	-1	NHP2	NHP2 ribonucleoprotein [Source:HGNC Symbol;Acc:HGNC:14377]
ENSG00000145949.11	18.5024	1.14673	0.339785	0.000103991	0.00106488	TRUE	340156	ENSG00000145949	protein_coding	6	2663629	2750922	-1	MYLK4	myosin light chain kinase family member 4 [Source:HGNC Symbol;Acc:HGNC:27972]
ENSG00000145990.11	48.3712	-1.27143	0.349582	3.3318e-05	0.000427322	TRUE	54438	ENSG00000145990	protein_coding	6	13357830	13487662	-1	GFOD1	glucose-fructose oxidoreductase domain containing 1 [Source:HGNC Symbol;Acc:HGNC:21096]
ENSG00000146054.18	42.7067	-1.19042	0.466086	0.00119262	0.00739419	TRUE	81786	ENSG00000146054	protein_coding	5	181193924	181205293	-1	TRIM7	tripartite motif containing 7 [Source:HGNC Symbol;Acc:HGNC:16278]
ENSG00000146122.17	883.943	1.38717	0.36797	1.71908e-05	0.000251224	TRUE	23500	ENSG00000146122	protein_coding	6	39792298	39904877	1	DAAM2	dishevelled associated activator of morphogenesis 2 [Source:HGNC Symbol;Acc:HGNC:18143]
ENSG00000146233.8	14.6598	5.84343	1.52407	3.11363e-06	6.33195e-05	TRUE	51302	ENSG00000146233	protein_coding	6	46549580	46652830	-1	CYP39A1	cytochrome P450 family 39 subfamily A member 1 [Source:HGNC Symbol;Acc:HGNC:17449]
ENSG00000146267.12	7.30449	-2.26507	0.561819	3.69768e-06	7.28311e-05	TRUE	84553	ENSG00000146267	protein_coding	6	99271168	99350062	-1	FAXC	failed axon connections homolog, metaxin like GST domain containing [Source:HGNC Symbol;Acc:HGNC:20742]
ENSG00000146278.11	439.796	1.40825	0.251594	2.33384e-09	1.56239e-07	TRUE	10957	ENSG00000146278	protein_coding	6	89080751	89085160	1	PNRC1	proline rich nuclear receptor coactivator 1 [Source:HGNC Symbol;Acc:HGNC:17278]
ENSG00000146374.14	102.523	2.49261	0.661415	7.72705e-06	0.000131508	TRUE	84870	ENSG00000146374	protein_coding	6	127118671	127199481	1	RSPO3	R-spondin 3 [Source:HGNC Symbol;Acc:HGNC:20866]
ENSG00000146410.12	65.0285	-1.78465	0.478414	1.53964e-05	0.000231051	TRUE	113115	ENSG00000146410	protein_coding	6	136231024	136250335	-1	MTFR2	mitochondrial fission regulator 2 [Source:HGNC Symbol;Acc:HGNC:21115]
ENSG00000146540.15	485.458	-1.96215	0.332678	3.11263e-10	2.88392e-08	TRUE	84310	ENSG00000146540	protein_coding	7	996986	1138260	-1	C7orf50	chromosome 7 open reading frame 50 [Source:HGNC Symbol;Acc:HGNC:22421]
ENSG00000146555.20	5.47818	2.19844	2.18896	0.00606964	0.0265366	TRUE	221935	ENSG00000146555	protein_coding	7	3301252	4269000	1	SDK1	sidekick cell adhesion molecule 1 [Source:HGNC Symbol;Acc:HGNC:19307]
ENSG00000146648.20	2385.39	1.14767	0.325223	5.58671e-05	0.00064967	TRUE	1956	ENSG00000146648	protein_coding	7	55019017	55211628	1	EGFR	epidermal growth factor receptor [Source:HGNC Symbol;Acc:HGNC:3236]
ENSG00000146670.10	523.521	-2.15229	0.515498	2.02607e-06	4.43096e-05	TRUE	113130	ENSG00000146670	protein_coding	11	65066300	65084164	-1	CDCA5	cell division cycle associated 5 [Source:HGNC Symbol;Acc:HGNC:14626]
ENSG00000146677.7	70.4175	1.31715	0.598838	0.00211813	0.0115986	TRUE	NA	ENSG00000146677	processed_pseudogene	7	44467897	44468304	1	RPL32P18	ribosomal protein L32 pseudogene 18 [Source:HGNC Symbol;Acc:HGNC:36301]
ENSG00000146918.20	994.472	-1.50256	0.406347	2.07215e-05	0.000291422	TRUE	54892	ENSG00000146918	protein_coding	7	158631169	158704804	-1	NCAPG2	non-SMC condensin II complex subunit G2 [Source:HGNC Symbol;Acc:HGNC:21904]
ENSG00000146966.13	42.8006	1.85266	0.746527	0.000673707	0.0046848	TRUE	27147	ENSG00000146966	protein_coding	7	140518420	140673993	-1	DENND2A	DENN domain containing 2A [Source:HGNC Symbol;Acc:HGNC:22212]
ENSG00000147027.4	5978.13	1.2587	0.290822	2.43807e-06	5.14325e-05	TRUE	83604	ENSG00000147027	protein_coding	X	34627075	34657285	-1	TMEM47	transmembrane protein 47 [Source:HGNC Symbol;Acc:HGNC:18515]
ENSG00000147041.12	3.89735	-2.42862	0.930617	0.000505897	0.0037438	TRUE	94122	ENSG00000147041	protein_coding	X	38006553	38128819	1	SYTL5	synaptotagmin like 5 [Source:HGNC Symbol;Acc:HGNC:15589]
ENSG00000147166.11	12.8065	-1.40412	0.708865	0.00328798	0.0163538	TRUE	26548	ENSG00000147166	protein_coding	X	71301750	71305371	1	ITGB1BP2	integrin subunit beta 1 binding protein 2 [Source:HGNC Symbol;Acc:HGNC:6154]
ENSG00000147180.17	20.276	-3.23022	0.922852	1.57896e-05	0.000235048	TRUE	7552	ENSG00000147180	protein_coding	X	85243991	85273362	1	ZNF711	zinc finger protein 711 [Source:HGNC Symbol;Acc:HGNC:13128]
ENSG00000147202.19	390.196	1.02329	0.300125	0.000102891	0.00105501	TRUE	1730	ENSG00000147202	protein_coding	X	96684712	97604997	1	DIAPH2	diaphanous related formin 2 [Source:HGNC Symbol;Acc:HGNC:2877]
ENSG00000147251.16	473.152	1.38182	0.215848	1.73974e-11	2.53444e-09	TRUE	139818	ENSG00000147251	protein_coding	X	118495815	118686163	1	DOCK11	dedicator of cytokinesis 11 [Source:HGNC Symbol;Acc:HGNC:23483]
ENSG00000147364.17	434.976	1.06898	0.167556	3.02572e-11	3.93735e-09	TRUE	26260	ENSG00000147364	protein_coding	8	406428	477967	1	FBXO25	F-box protein 25 [Source:HGNC Symbol;Acc:HGNC:13596]
ENSG00000147536.12	257.523	-1.81318	0.415594	1.06327e-06	2.69603e-05	TRUE	84296	ENSG00000147536	protein_coding	8	41529218	41545030	1	GINS4	GINS complex subunit 4 [Source:HGNC Symbol;Acc:HGNC:28226]
ENSG00000147573.17	223.869	3.92721	1.31551	6.74857e-05	0.000751164	TRUE	84675	ENSG00000147573	protein_coding	8	66126896	66175485	1	TRIM55	tripartite motif containing 55 [Source:HGNC Symbol;Acc:HGNC:14215]
ENSG00000147804.10	37.0371	-1.348	0.667262	0.00344954	0.0169571	TRUE	55630	ENSG00000147804	protein_coding	8	144409742	144416844	-1	SLC39A4	solute carrier family 39 member 4 [Source:HGNC Symbol;Acc:HGNC:17129]
ENSG00000147813.16	76.3664	-1.03599	0.390145	0.00125778	0.007723	TRUE	93100	ENSG00000147813	protein_coding	8	143574785	143578649	-1	NAPRT	nicotinate phosphoribosyltransferase [Source:HGNC Symbol;Acc:HGNC:30450]
ENSG00000148154.10	1376.27	2.66634	0.218214	1.43677e-35	3.328e-31	TRUE	7357	ENSG00000148154	protein_coding	9	111896814	111935369	1	UGCG	UDP-glucose ceramide glucosyltransferase [Source:HGNC Symbol;Acc:HGNC:12524]
ENSG00000148291.10	62.9028	-1.14144	0.250027	8.68458e-07	2.28852e-05	TRUE	6835	ENSG00000148291	protein_coding	9	133356550	133361158	1	SURF2	surfeit 2 [Source:HGNC Symbol;Acc:HGNC:11475]
ENSG00000148335.15	502.776	-1.30459	0.196893	4.9724e-12	8.4688e-10	TRUE	28989	ENSG00000148335	protein_coding	9	129608884	129636135	1	NTMT1	N-terminal Xaa-Pro-Lys N-methyltransferase 1 [Source:HGNC Symbol;Acc:HGNC:23373]
ENSG00000148362.11	149.111	-1.26943	0.417663	0.000275755	0.00232943	TRUE	286257	ENSG00000148362	protein_coding	9	136992422	136993984	1	PAXX	PAXX non-homologous end joining factor [Source:HGNC Symbol;Acc:HGNC:27849]
ENSG00000148384.14	240.528	-1.27119	0.284937	1.07233e-06	2.71161e-05	TRUE	56623	ENSG00000148384	protein_coding	9	136428619	136439845	-1	INPP5E	inositol polyphosphate-5-phosphatase E [Source:HGNC Symbol;Acc:HGNC:21474]
ENSG00000148400.13	207.246	-1.37656	0.393781	4.95055e-05	0.000588216	TRUE	4851	ENSG00000148400	protein_coding	9	136494433	136546048	-1	NOTCH1	notch receptor 1 [Source:HGNC Symbol;Acc:HGNC:7881]
ENSG00000148655.15	38.7209	2.54949	0.494537	1.38925e-08	7.29685e-07	TRUE	83938	ENSG00000148655	protein_coding	10	75431624	76560168	1	LRMDA	leucine rich melanocyte differentiation associated [Source:HGNC Symbol;Acc:HGNC:23405]
ENSG00000148690.12	281.399	1.18061	0.234357	6.39756e-08	2.57269e-06	TRUE	118924	ENSG00000148690	protein_coding	10	93667883	93702592	-1	FRA10AC1	FRA10A associated CGG repeat 1 [Source:HGNC Symbol;Acc:HGNC:1162]
ENSG00000148773.14	2830.28	-1.86595	0.52556	2.44303e-05	0.000334444	TRUE	4288	ENSG00000148773	protein_coding	10	128096659	128126423	-1	MKI67	marker of proliferation Ki-67 [Source:HGNC Symbol;Acc:HGNC:7107]
ENSG00000148926.10	4243.44	1.01341	0.535159	0.00731912	0.0307626	TRUE	133	ENSG00000148926	protein_coding	11	10305073	10307397	1	ADM	adrenomedullin [Source:HGNC Symbol;Acc:HGNC:259]
ENSG00000148943.12	454.59	1.19708	0.158175	5.59576e-15	1.87847e-12	TRUE	55327	ENSG00000148943	protein_coding	11	27494418	27506769	-1	LIN7C	lin-7 homolog C, crumbs cell polarity complex component [Source:HGNC Symbol;Acc:HGNC:17789]
ENSG00000149131.17	3087.56	2.05628	0.274249	6.04569e-15	2.00052e-12	TRUE	710	ENSG00000149131	protein_coding	11	57597387	57619171	1	SERPING1	serpin family G member 1 [Source:HGNC Symbol;Acc:HGNC:1228]
ENSG00000149503.13	404.277	-1.71844	0.394714	1.16069e-06	2.89087e-05	TRUE	3619	ENSG00000149503	protein_coding	11	62123998	62153169	1	INCENP	inner centromere protein [Source:HGNC Symbol;Acc:HGNC:6058]
ENSG00000149541.10	454.933	-1.73255	0.349376	6.37391e-08	2.56763e-06	TRUE	26229	ENSG00000149541	protein_coding	11	62615296	62622154	-1	B3GAT3	beta-1,3-glucuronyltransferase 3 [Source:HGNC Symbol;Acc:HGNC:923]
ENSG00000149716.13	460.49	-1.26712	0.27824	6.7721e-07	1.86963e-05	TRUE	220064	ENSG00000149716	protein_coding	11	69653076	69675416	-1	LTO1	LTO1 maturation factor of ABCE1 [Source:HGNC Symbol;Acc:HGNC:17589]
ENSG00000149926.14	2.40968	-2.12837	1.45282	0.00319009	0.0159905	TRUE	83723	ENSG00000149926	protein_coding	16	30024427	30052978	-1	TLCD3B	TLC domain containing 3B [Source:HGNC Symbol;Acc:HGNC:25295]
ENSG00000149929.16	235.989	-1.33407	0.304383	1.39118e-06	3.29826e-05	TRUE	8479	ENSG00000149929	protein_coding	16	29992330	29996074	-1	HIRIP3	HIRA interacting protein 3 [Source:HGNC Symbol;Acc:HGNC:4917]
ENSG00000149970.16	16.909	2.54061	1.0887	0.000565765	0.00409526	TRUE	22866	ENSG00000149970	protein_coding	X	21372801	21654695	1	CNKSR2	connector enhancer of kinase suppressor of Ras 2 [Source:HGNC Symbol;Acc:HGNC:19701]
ENSG00000150045.12	1.7264	1.80478	3.59842	0.00592972	0.0260231	TRUE	51348	ENSG00000150045	protein_coding	12	9827481	9845007	1	KLRF1	killer cell lectin like receptor F1 [Source:HGNC Symbol;Acc:HGNC:13342]
ENSG00000150051.14	881.493	1.13122	0.732268	0.00935569	0.0370881	TRUE	283078	ENSG00000150051	protein_coding	10	27672874	27746060	-1	MKX	mohawk homeobox [Source:HGNC Symbol;Acc:HGNC:23729]
ENSG00000150347.17	2171.74	1.09364	0.250265	1.94948e-06	4.30601e-05	TRUE	84159	ENSG00000150347	protein_coding	10	61901684	62096944	1	ARID5B	AT-rich interaction domain 5B [Source:HGNC Symbol;Acc:HGNC:17362]
ENSG00000150551.11	47.0385	-6.70036	0.746969	2.05042e-21	3.65337e-18	TRUE	116372	ENSG00000150551	protein_coding	2	132643286	132671579	-1	LYPD1	LY6/PLAUR domain containing 1 [Source:HGNC Symbol;Acc:HGNC:28431]
ENSG00000150593.18	1095.63	1.30691	0.243807	8.89361e-09	4.88158e-07	TRUE	27250	ENSG00000150593	protein_coding	10	110871795	110900006	1	PDCD4	programmed cell death 4 [Source:HGNC Symbol;Acc:HGNC:8763]
ENSG00000150594.7	693.29	2.64421	0.700322	6.94678e-06	0.000121624	TRUE	150	ENSG00000150594	protein_coding	10	111077029	111080907	1	ADRA2A	adrenoceptor alpha 2A [Source:HGNC Symbol;Acc:HGNC:281]
ENSG00000151012.13	693.766	1.9094	0.46773	2.9443e-06	6.06211e-05	TRUE	23657	ENSG00000151012	protein_coding	4	138164097	138242349	-1	SLC7A11	solute carrier family 7 member 11 [Source:HGNC Symbol;Acc:HGNC:11059]
ENSG00000151090.20	386.469	2.35573	0.568863	1.78479e-06	3.99431e-05	TRUE	7068	ENSG00000151090	protein_coding	3	24117153	24495756	-1	THRB	thyroid hormone receptor beta [Source:HGNC Symbol;Acc:HGNC:11799]
ENSG00000151151.6	234.044	1.88312	0.303164	3.81208e-11	4.69676e-09	TRUE	253430	ENSG00000151151	protein_coding	10	58191517	58267894	-1	IPMK	inositol polyphosphate multikinase [Source:HGNC Symbol;Acc:HGNC:20739]
ENSG00000151303.11	11.072	1.79359	0.502845	2.88589e-05	0.000383622	TRUE	NA	ENSG00000151303	lncRNA	10	86992406	87010203	1		novel transcript
ENSG00000151575.14	47.2328	1.99072	0.300766	2.30094e-12	4.19658e-10	TRUE	374618	ENSG00000151575	protein_coding	15	56244009	56445997	1	TEX9	testis expressed 9 [Source:HGNC Symbol;Acc:HGNC:29585]
ENSG00000151692.15	125.496	-1.16683	0.701761	0.0081698	0.0334294	TRUE	9781	ENSG00000151692	protein_coding	2	6917412	7068286	1	RNF144A	ring finger protein 144A [Source:HGNC Symbol;Acc:HGNC:20457]
ENSG00000151773.13	46.2544	1.53426	0.513466	0.00018264	0.00166771	TRUE	160857	ENSG00000151773	protein_coding	13	43823909	43879740	-1	CCDC122	coiled-coil domain containing 122 [Source:HGNC Symbol;Acc:HGNC:26478]
ENSG00000151892.16	652.682	1.985	0.857465	0.000865814	0.00569417	TRUE	2674	ENSG00000151892	protein_coding	10	116056925	116276803	-1	GFRA1	GDNF family receptor alpha 1 [Source:HGNC Symbol;Acc:HGNC:4243]
ENSG00000152076.19	87.1446	-1.32874	0.282442	2.9263e-07	9.31069e-06	TRUE	91409	ENSG00000152076	protein_coding	2	130139287	130145134	-1	CCDC74B	coiled-coil domain containing 74B [Source:HGNC Symbol;Acc:HGNC:25267]
ENSG00000152082.15	484.242	-1.93913	0.531864	1.87969e-05	0.00026976	TRUE	80097	ENSG00000152082	protein_coding	2	130181737	130190729	1	MZT2B	mitotic spindle organizing protein 2B [Source:HGNC Symbol;Acc:HGNC:25886]
ENSG00000152092.16	9.85155	1.67223	0.981377	0.00364352	0.0177445	TRUE	460	ENSG00000152092	protein_coding	1	176857302	177164973	-1	ASTN1	astrotactin 1 [Source:HGNC Symbol;Acc:HGNC:773]
ENSG00000152219.5	442.937	1.17418	0.20541	1.52494e-09	1.10038e-07	TRUE	120534	ENSG00000152219	protein_coding	11	30323104	30338223	1	ARL14EP	ADP ribosylation factor like GTPase 14 effector protein [Source:HGNC Symbol;Acc:HGNC:26798]
ENSG00000152253.9	129.888	-1.673	0.598801	0.000370058	0.00293349	TRUE	57405	ENSG00000152253	protein_coding	2	168834132	168913371	-1	SPC25	SPC25 component of NDC80 kinetochore complex [Source:HGNC Symbol;Acc:HGNC:24031]
ENSG00000152409.9	404.679	1.82932	0.289893	2.17992e-11	3.00557e-09	TRUE	133746	ENSG00000152409	protein_coding	5	79236131	79327211	1	JMY	junction mediating and regulatory protein, p53 cofactor [Source:HGNC Symbol;Acc:HGNC:28916]
ENSG00000152518.8	1545.1	1.48643	0.303636	9.83003e-08	3.69785e-06	TRUE	678	ENSG00000152518	protein_coding	2	43222402	43226606	-1	ZFP36L2	ZFP36 ring finger protein like 2 [Source:HGNC Symbol;Acc:HGNC:1108]
ENSG00000152520.14	540.86	1.04255	0.171248	2.04945e-10	2.09333e-08	TRUE	255967	ENSG00000152520	protein_coding	13	28138506	28295335	1	PAN3	poly(A) specific ribonuclease subunit PAN3 [Source:HGNC Symbol;Acc:HGNC:29991]
ENSG00000152580.9	120.667	3.11216	0.88448	1.53754e-05	0.000230961	TRUE	285313	ENSG00000152580	protein_coding	3	151425384	151461061	-1	IGSF10	immunoglobulin superfamily member 10 [Source:HGNC Symbol;Acc:HGNC:26384]
ENSG00000152582.14	108.297	1.41998	0.257448	3.48284e-09	2.17446e-07	TRUE	79925	ENSG00000152582	protein_coding	5	35617844	35814611	1	SPEF2	sperm flagellar 2 [Source:HGNC Symbol;Acc:HGNC:26293]
ENSG00000152661.9	6667.92	2.05188	0.353911	5.11683e-10	4.43899e-08	TRUE	2697	ENSG00000152661	protein_coding	6	121435595	121449727	1	GJA1	gap junction protein alpha 1 [Source:HGNC Symbol;Acc:HGNC:4274]
ENSG00000152926.16	338.18	1.56538	0.181885	7.58753e-19	7.98863e-16	TRUE	109504726	ENSG00000152926	protein_coding	7	64971772	65006684	-1	ZNF117	zinc finger protein 117 [Source:HGNC Symbol;Acc:HGNC:12897]
ENSG00000152926.16	338.18	1.56538	0.181885	7.58753e-19	7.98863e-16	TRUE	51351	ENSG00000152926	protein_coding	7	64971772	65006684	-1	ZNF117	zinc finger protein 117 [Source:HGNC Symbol;Acc:HGNC:12897]
ENSG00000152953.13	361.231	1.2096	0.580296	0.00320526	0.0160492	TRUE	55351	ENSG00000152953	protein_coding	4	5051480	5500994	1	STK32B	serine/threonine kinase 32B [Source:HGNC Symbol;Acc:HGNC:14217]
ENSG00000153012.12	10.8326	-1.17521	0.997022	0.0133546	0.0487574	TRUE	55203	ENSG00000153012	protein_coding	4	24998847	25030946	-1	LGI2	leucine rich repeat LGI family member 2 [Source:HGNC Symbol;Acc:HGNC:18710]
ENSG00000153214.11	1405.25	1.55461	0.182982	1.96996e-18	1.62965e-15	TRUE	84910	ENSG00000153214	protein_coding	2	112055269	112119318	1	TMEM87B	transmembrane protein 87B [Source:HGNC Symbol;Acc:HGNC:25913]
ENSG00000153291.16	61.7049	2.53722	0.636457	3.01861e-06	6.16579e-05	TRUE	9481	ENSG00000153291	protein_coding	6	46652915	46678190	1	SLC25A27	solute carrier family 25 member 27 [Source:HGNC Symbol;Acc:HGNC:21065]
ENSG00000153404.15	54.6513	-3.20846	0.961588	3.44464e-05	0.000438396	TRUE	153478	ENSG00000153404	protein_coding	5	92168	189972	1	PLEKHG4B	pleckstrin homology and RhoGEF domain containing G4B [Source:HGNC Symbol;Acc:HGNC:29399]
ENSG00000153684.16	10.8686	-2.58751	0.778852	5.03603e-05	0.000595759	TRUE	100132565	ENSG00000153684	protein_coding	15	28378621	28392021	1	GOLGA8F	golgin A8 family member F [Source:HGNC Symbol;Acc:HGNC:32378]
ENSG00000153714.6	361.857	1.92105	0.289207	2.27517e-12	4.18252e-10	TRUE	286343	ENSG00000153714	protein_coding	9	12775020	12823060	1	LURAP1L	leucine rich adaptor protein 1 like [Source:HGNC Symbol;Acc:HGNC:31452]
ENSG00000153815.18	753.85	-1.57686	0.319736	8.03609e-08	3.1284e-06	TRUE	80790	ENSG00000153815	protein_coding	16	81444808	81711762	1	CMIP	c-Maf inducing protein [Source:HGNC Symbol;Acc:HGNC:24319]
ENSG00000153885.15	610.569	-1.04862	0.313596	0.0001336	0.00130243	TRUE	79047	ENSG00000153885	protein_coding	19	33795933	33815763	1	KCTD15	potassium channel tetramerization domain containing 15 [Source:HGNC Symbol;Acc:HGNC:23297]
ENSG00000153904.21	5324.33	1.3542	0.284347	3.00156e-07	9.485e-06	TRUE	23576	ENSG00000153904	protein_coding	1	85318481	85578363	-1	DDAH1	dimethylarginine dimethylaminohydrolase 1 [Source:HGNC Symbol;Acc:HGNC:2715]
ENSG00000153930.13	20.4999	2.35819	0.56805	2.20251e-06	4.74573e-05	TRUE	162282	ENSG00000153930	protein_coding	17	55882301	56517016	1	ANKFN1	ankyrin repeat and fibronectin type III domain containing 1 [Source:HGNC Symbol;Acc:HGNC:26766]
ENSG00000153976.3	517.548	-2.16795	0.365249	2.20592e-10	2.22155e-08	TRUE	9955	ENSG00000153976	protein_coding	17	13494032	13601929	-1	HS3ST3A1	heparan sulfate-glucosamine 3-sulfotransferase 3A1 [Source:HGNC Symbol;Acc:HGNC:5196]
ENSG00000153993.14	512.094	2.68222	0.564094	9.18791e-08	3.49457e-06	TRUE	223117	ENSG00000153993	protein_coding	7	84995553	85187056	-1	SEMA3D	semaphorin 3D [Source:HGNC Symbol;Acc:HGNC:10726]
ENSG00000154118.13	2.53684	-2.24394	1.61388	0.0053895	0.0241552	TRUE	57338	ENSG00000154118	protein_coding	16	87601835	87698156	1	JPH3	junctophilin 3 [Source:HGNC Symbol;Acc:HGNC:14203]
ENSG00000154146.13	6.48148	-2.48697	0.744055	4.58232e-05	0.000552814	TRUE	4900	ENSG00000154146	protein_coding	11	124739942	124747210	1	NRGN	neurogranin [Source:HGNC Symbol;Acc:HGNC:8000]
ENSG00000154153.15	20.0743	2.13125	0.61704	2.37536e-05	0.000326337	TRUE	54463	ENSG00000154153	protein_coding	5	16473038	16617101	-1	RETREG1	reticulophagy regulator 1 [Source:HGNC Symbol;Acc:HGNC:25964]
ENSG00000154175.18	1884.21	2.00157	0.745035	0.000340651	0.00275122	TRUE	25890	ENSG00000154175	protein_coding	3	100749156	100993515	-1	ABI3BP	ABI family member 3 binding protein [Source:HGNC Symbol;Acc:HGNC:17265]
ENSG00000154258.17	20.0451	2.73567	0.710023	4.44783e-06	8.45161e-05	TRUE	10350	ENSG00000154258	protein_coding	17	68974488	69060949	-1	ABCA9	ATP binding cassette subfamily A member 9 [Source:HGNC Symbol;Acc:HGNC:39]
ENSG00000154262.13	83.2834	3.257	0.613986	5.11779e-09	3.00872e-07	TRUE	23460	ENSG00000154262	protein_coding	17	69078702	69141895	-1	ABCA6	ATP binding cassette subfamily A member 6 [Source:HGNC Symbol;Acc:HGNC:36]
ENSG00000154263.18	13.0429	2.03994	0.774005	0.000402584	0.00313447	TRUE	10349	ENSG00000154263	protein_coding	17	69147214	69244846	-1	ABCA10	ATP binding cassette subfamily A member 10 [Source:HGNC Symbol;Acc:HGNC:30]
ENSG00000154265.16	203.512	1.69743	0.3995	1.64752e-06	3.77837e-05	TRUE	23461	ENSG00000154265	protein_coding	17	69244311	69327244	-1	ABCA5	ATP binding cassette subfamily A member 5 [Source:HGNC Symbol;Acc:HGNC:35]
ENSG00000154277.13	1644.72	-1.12756	0.503603	0.00282472	0.0145657	TRUE	7345	ENSG00000154277	protein_coding	4	41256413	41268455	1	UCHL1	ubiquitin C-terminal hydrolase L1 [Source:HGNC Symbol;Acc:HGNC:12513]
ENSG00000154511.12	920.155	1.32156	0.195261	1.60493e-12	3.09792e-10	TRUE	388650	ENSG00000154511	protein_coding	1	92832737	92961522	-1	DIPK1A	divergent protein kinase domain 1A [Source:HGNC Symbol;Acc:HGNC:32213]
ENSG00000154553.16	25.705	-4.82818	0.979409	1.91425e-08	9.55601e-07	TRUE	27295	ENSG00000154553	protein_coding	4	185500660	185535507	-1	PDLIM3	PDZ and LIM domain 3 [Source:HGNC Symbol;Acc:HGNC:20767]
ENSG00000154589.7	74.8413	1.31804	0.329419	7.22855e-06	0.000125138	TRUE	23643	ENSG00000154589	protein_coding	8	73991392	74029079	1	LY96	lymphocyte antigen 96 [Source:HGNC Symbol;Acc:HGNC:17156]
ENSG00000154642.11	206.641	1.11245	0.347609	0.000181821	0.00166266	TRUE	54149	ENSG00000154642	protein_coding	21	17788974	17819386	-1	C21orf91	chromosome 21 open reading frame 91 [Source:HGNC Symbol;Acc:HGNC:16459]
ENSG00000154721.15	327.101	2.80961	0.573164	4.50756e-08	1.92281e-06	TRUE	58494	ENSG00000154721	protein_coding	21	25639258	25717562	1	JAM2	junctional adhesion molecule 2 [Source:HGNC Symbol;Acc:HGNC:14686]
ENSG00000154736.6	1412.87	1.79487	0.390454	3.38829e-07	1.04924e-05	TRUE	11096	ENSG00000154736	protein_coding	21	26917922	26967088	-1	ADAMTS5	ADAM metallopeptidase with thrombospondin type 1 motif 5 [Source:HGNC Symbol;Acc:HGNC:221]
ENSG00000154839.10	199.995	-1.79482	0.522638	4.40103e-05	0.000534843	TRUE	220134	ENSG00000154839	protein_coding	18	50375040	50394168	1	SKA1	spindle and kinetochore associated complex subunit 1 [Source:HGNC Symbol;Acc:HGNC:28109]
ENSG00000154920.15	115.458	-1.87844	0.440605	1.69452e-06	3.83678e-05	TRUE	146956	ENSG00000154920	protein_coding	17	50373220	50381483	1	EME1	essential meiotic structure-specific endonuclease 1 [Source:HGNC Symbol;Acc:HGNC:24965]
ENSG00000154930.15	100.479	1.60301	0.755905	0.00176827	0.0100734	TRUE	84532	ENSG00000154930	protein_coding	20	25006230	25058980	-1	ACSS1	acyl-CoA synthetase short chain family member 1 [Source:HGNC Symbol;Acc:HGNC:16091]
ENSG00000155016.18	309.658	1.13777	0.398107	0.000526644	0.00386768	TRUE	113612	ENSG00000155016	protein_coding	4	107931549	107953461	1	CYP2U1	cytochrome P450 family 2 subfamily U member 1 [Source:HGNC Symbol;Acc:HGNC:20582]
ENSG00000155269.12	7.4712	2.16114	1.02926	0.00151277	0.00890249	TRUE	27201	ENSG00000155269	protein_coding	4	8558725	8619761	1	GPR78	G protein-coupled receptor 78 [Source:HGNC Symbol;Acc:HGNC:4528]
ENSG00000155313.16	814.683	1.18483	0.218652	8.44988e-09	4.67123e-07	TRUE	29761	ENSG00000155313	protein_coding	21	15729982	15880064	1	USP25	ubiquitin specific peptidase 25 [Source:HGNC Symbol;Acc:HGNC:12624]
ENSG00000155465.20	24.4561	1.92976	0.437442	6.53078e-07	1.80948e-05	TRUE	9056	ENSG00000155465	protein_coding	14	22773222	22829820	-1	SLC7A7	solute carrier family 7 member 7 [Source:HGNC Symbol;Acc:HGNC:11065]
ENSG00000155719.18	4.00217	-1.15317	0.871576	0.0128327	0.0472342	TRUE	146183	ENSG00000155719	protein_coding	16	21663968	21761935	1	OTOA	otoancorin [Source:HGNC Symbol;Acc:HGNC:16378]
ENSG00000155761.14	10.427	1.14786	0.708776	0.00759303	0.0315985	TRUE	200162	ENSG00000155761	protein_coding	1	117953590	118185228	-1	SPAG17	sperm associated antigen 17 [Source:HGNC Symbol;Acc:HGNC:26620]
ENSG00000155792.10	125.001	1.56891	0.847726	0.00297944	0.0151577	TRUE	64798	ENSG00000155792	protein_coding	8	119873717	120050918	1	DEPTOR	DEP domain containing MTOR interacting protein [Source:HGNC Symbol;Acc:HGNC:22953]
ENSG00000155875.15	33.5773	1.23231	0.484714	0.00101592	0.00650045	TRUE	158297	ENSG00000155875	protein_coding	9	18858906	19049358	-1	SAXO1	stabilizer of axonemal microtubules 1 [Source:HGNC Symbol;Acc:HGNC:28566]
ENSG00000155957.19	716.881	1.09159	0.123273	1.45361e-19	1.87056e-16	TRUE	51643	ENSG00000155957	protein_coding	12	66135846	66170027	-1	TMBIM4	transmembrane BAX inhibitor motif containing 4 [Source:HGNC Symbol;Acc:HGNC:24257]
ENSG00000155962.13	42.8026	3.23221	0.94376	1.52209e-05	0.000229383	TRUE	1193	ENSG00000155962	protein_coding	X	155276211	155334657	-1	CLIC2	chloride intracellular channel 2 [Source:HGNC Symbol;Acc:HGNC:2063]
ENSG00000155980.13	34.94	-1.09521	0.636085	0.00800868	0.0329494	TRUE	3798	ENSG00000155980	protein_coding	12	57546026	57586633	1	KIF5A	kinesin family member 5A [Source:HGNC Symbol;Acc:HGNC:6323]
ENSG00000156011.18	1199.52	1.00971	0.341291	0.000488239	0.00364357	TRUE	23362	ENSG00000156011	protein_coding	8	18527303	19084730	-1	PSD3	pleckstrin and Sec7 domain containing 3 [Source:HGNC Symbol;Acc:HGNC:19093]
ENSG00000156042.19	14.4287	1.00586	0.461491	0.00393775	0.0189076	TRUE	118491	ENSG00000156042	protein_coding	10	73253762	73358864	-1	CFAP70	cilia and flagella associated protein 70 [Source:HGNC Symbol;Acc:HGNC:30726]
ENSG00000156049.7	3.55351	2.20424	1.21743	0.00403559	0.0192814	TRUE	9630	ENSG00000156049	protein_coding	9	77423079	77648322	-1	GNA14	G protein subunit alpha 14 [Source:HGNC Symbol;Acc:HGNC:4382]
ENSG00000156265.16	247.002	2.47356	0.430744	5.19907e-10	4.49351e-08	TRUE	56911	ENSG00000156265	protein_coding	21	29077471	29175889	1	MAP3K7CL	MAP3K7 C-terminal like [Source:HGNC Symbol;Acc:HGNC:16457]
ENSG00000156273.16	691.626	1.08362	0.179216	2.51374e-10	2.46719e-08	TRUE	100379661	ENSG00000156273	protein_coding	21	29194071	29630751	1	BACH1	BTB domain and CNC homolog 1 [Source:HGNC Symbol;Acc:HGNC:935]
ENSG00000156273.16	691.626	1.08362	0.179216	2.51374e-10	2.46719e-08	TRUE	571	ENSG00000156273	protein_coding	21	29194071	29630751	1	BACH1	BTB domain and CNC homolog 1 [Source:HGNC Symbol;Acc:HGNC:935]
ENSG00000156381.9	270.314	-1.50473	0.352243	1.93143e-06	4.27703e-05	TRUE	122416	ENSG00000156381	protein_coding	14	102501767	102509799	-1	ANKRD9	ankyrin repeat domain 9 [Source:HGNC Symbol;Acc:HGNC:20096]
ENSG00000156463.18	17.3947	-2.4516	0.822298	0.000127386	0.00125506	TRUE	153769	ENSG00000156463	protein_coding	5	145936578	146081791	1	SH3RF2	SH3 domain containing ring finger 2 [Source:HGNC Symbol;Acc:HGNC:26299]
ENSG00000156486.8	41.8059	1.73367	0.61396	0.000283108	0.00237768	TRUE	3788	ENSG00000156486	protein_coding	8	98426958	98432853	1	KCNS2	potassium voltage-gated channel modifier subfamily S member 2 [Source:HGNC Symbol;Acc:HGNC:6301]
ENSG00000156509.14	23.6987	-1.9114	0.732758	0.000554496	0.00402753	TRUE	286151	ENSG00000156509	protein_coding	8	100133351	100145817	-1	FBXO43	F-box protein 43 [Source:HGNC Symbol;Acc:HGNC:28521]
ENSG00000156535.15	9919.35	1.2421	0.295213	3.15261e-06	6.4056e-05	TRUE	135228	ENSG00000156535	protein_coding	6	73695785	73828316	1	CD109	CD109 molecule [Source:HGNC Symbol;Acc:HGNC:21685]
ENSG00000156711.17	269.633	1.14663	0.32234	4.84851e-05	0.000579196	TRUE	5603	ENSG00000156711	protein_coding	6	36127809	36144524	1	MAPK13	mitogen-activated protein kinase 13 [Source:HGNC Symbol;Acc:HGNC:6875]
ENSG00000156875.14	1194.55	1.01165	0.422133	0.00239338	0.0127914	TRUE	64645	ENSG00000156875	protein_coding	1	100038095	100083377	1	MFSD14A	major facilitator superfamily domain containing 14A [Source:HGNC Symbol;Acc:HGNC:23363]
ENSG00000156970.13	709.796	-2.44495	0.534759	3.1078e-07	9.73739e-06	TRUE	701	ENSG00000156970	protein_coding	15	40161023	40221123	1	BUB1B	BUB1 mitotic checkpoint serine/threonine kinase B [Source:HGNC Symbol;Acc:HGNC:1149]
ENSG00000157005.4	13.8239	-3.58873	1.27211	0.000152589	0.00144735	TRUE	6750	ENSG00000157005	protein_coding	3	187668912	187670394	-1	SST	somatostatin [Source:HGNC Symbol;Acc:HGNC:11329]
ENSG00000157193.18	339.641	-1.72934	0.379091	4.24937e-07	1.26514e-05	TRUE	7804	ENSG00000157193	protein_coding	1	53242364	53328469	-1	LRP8	LDL receptor related protein 8 [Source:HGNC Symbol;Acc:HGNC:6700]
ENSG00000157214.14	559.999	1.77483	0.406596	9.7896e-07	2.51898e-05	TRUE	261729	ENSG00000157214	protein_coding	7	90167590	90238137	1	STEAP2	STEAP2 metalloreductase [Source:HGNC Symbol;Acc:HGNC:17885]
ENSG00000157404.17	523.848	2.4476	0.562702	6.87781e-07	1.89205e-05	TRUE	3815	ENSG00000157404	protein_coding	4	54657267	54740783	1	KIT	KIT proto-oncogene, receptor tyrosine kinase [Source:HGNC Symbol;Acc:HGNC:6342]
ENSG00000157456.8	539.046	-2.13953	0.552751	7.12884e-06	0.000124154	TRUE	9133	ENSG00000157456	protein_coding	15	59105126	59125045	1	CCNB2	cyclin B2 [Source:HGNC Symbol;Acc:HGNC:1580]
ENSG00000157483.9	2106.36	1.49405	0.208354	7.63953e-14	2.01085e-11	TRUE	4643	ENSG00000157483	protein_coding	15	59132434	59372871	-1	MYO1E	myosin IE [Source:HGNC Symbol;Acc:HGNC:7599]
ENSG00000157542.11	52.6399	4.20947	1.38896	5.18076e-05	0.000609456	TRUE	3763	ENSG00000157542	protein_coding	21	37607373	38121345	-1	KCNJ6	potassium inwardly rectifying channel subfamily J member 6 [Source:HGNC Symbol;Acc:HGNC:6267]
ENSG00000157551.19	84.8255	2.18016	0.742303	0.000148412	0.00141218	TRUE	3772	ENSG00000157551	protein_coding	21	38155549	38307357	1	KCNJ15	potassium inwardly rectifying channel subfamily J member 15 [Source:HGNC Symbol;Acc:HGNC:6261]
ENSG00000157554.20	90.1698	-2.23948	0.615845	1.6564e-05	0.00024422	TRUE	2078	ENSG00000157554	protein_coding	21	38380027	38661780	-1	ERG	ETS transcription factor ERG [Source:HGNC Symbol;Acc:HGNC:3446]
ENSG00000157570.12	271.326	1.42139	0.583571	0.00110732	0.00697438	TRUE	90139	ENSG00000157570	protein_coding	11	44726465	44932423	1	TSPAN18	tetraspanin 18 [Source:HGNC Symbol;Acc:HGNC:20660]
ENSG00000157778.9	321.594	-1.11015	0.242817	7.99803e-07	2.13431e-05	TRUE	84262	ENSG00000157778	protein_coding	7	1567332	1571005	-1	PSMG3	proteasome assembly chaperone 3 [Source:HGNC Symbol;Acc:HGNC:22420]
ENSG00000157796.18	602.699	1.02149	0.193099	2.19205e-08	1.07119e-06	TRUE	57728	ENSG00000157796	protein_coding	4	39182504	39285810	1	WDR19	WD repeat domain 19 [Source:HGNC Symbol;Acc:HGNC:18340]
ENSG00000157870.17	294.871	-1.52703	0.264511	8.58243e-10	6.83144e-08	TRUE	127281	ENSG00000157870	protein_coding	1	2586491	2591469	1	PRXL2B	peroxiredoxin like 2B [Source:HGNC Symbol;Acc:HGNC:28390]
ENSG00000158023.10	75.014	1.01222	0.377335	0.00105054	0.00668323	TRUE	144406	ENSG00000158023	protein_coding	12	121918592	122003927	1	CFAP251	cilia and flagella associated protein 251 [Source:HGNC Symbol;Acc:HGNC:28506]
ENSG00000158050.5	93.2118	-4.24082	0.88298	8.55082e-08	3.31208e-06	TRUE	1844	ENSG00000158050	protein_coding	2	96143169	96145440	-1	DUSP2	dual specificity phosphatase 2 [Source:HGNC Symbol;Acc:HGNC:3068]
ENSG00000158104.11	5.76682	-1.48666	0.925146	0.00678461	0.0289681	TRUE	3242	ENSG00000158104	protein_coding	12	121839527	121863596	-1	HPD	4-hydroxyphenylpyruvate dioxygenase [Source:HGNC Symbol;Acc:HGNC:5147]
ENSG00000158164.7	11.7933	-2.47578	0.859061	0.000212726	0.00189709	TRUE	11013	ENSG00000158164	protein_coding	X	102513682	102516739	-1	TMSB15A	thymosin beta 15A [Source:HGNC Symbol;Acc:HGNC:30744]
ENSG00000158286.13	93.7773	-1.12686	0.339898	0.000128468	0.00126449	TRUE	388591	ENSG00000158286	protein_coding	1	6205475	6221299	1	RNF207	ring finger protein 207 [Source:HGNC Symbol;Acc:HGNC:32947]
ENSG00000158321.18	475.067	-1.46497	0.304227	1.57267e-07	5.44315e-06	TRUE	26053	ENSG00000158321	protein_coding	7	69598296	70793506	1	AUTS2	activator of transcription and developmental regulator AUTS2 [Source:HGNC Symbol;Acc:HGNC:14262]
ENSG00000158402.21	119.452	-2.10713	0.626022	4.8047e-05	0.000575149	TRUE	995	ENSG00000158402	protein_coding	5	138285269	138338355	-1	CDC25C	cell division cycle 25C [Source:HGNC Symbol;Acc:HGNC:1727]
ENSG00000158406.6	33.8484	1.34838	0.404496	7.51484e-05	0.000820293	TRUE	8365	ENSG00000158406	protein_coding	6	26277609	26285638	-1	H4C8	H4 clustered histone 8 [Source:HGNC Symbol;Acc:HGNC:4788]
ENSG00000158427.15	45.9995	-1.68829	0.477932	3.34004e-05	0.000427757	TRUE	286527	ENSG00000158427	protein_coding	X	103918896	103966712	1	TMSB15B	thymosin beta 15B [Source:HGNC Symbol;Acc:HGNC:28612]
ENSG00000158457.6	4.81599	-1.37562	1.16502	0.0104392	0.0403071	TRUE	340348	ENSG00000158457	protein_coding	7	129144707	129169699	1	TSPAN33	tetraspanin 33 [Source:HGNC Symbol;Acc:HGNC:28743]
ENSG00000158715.6	30.1818	-1.79851	0.407551	8.80416e-07	2.30802e-05	TRUE	85414	ENSG00000158715	protein_coding	1	205657851	205680509	-1	SLC45A3	solute carrier family 45 member 3 [Source:HGNC Symbol;Acc:HGNC:8642]
ENSG00000158717.11	94.3568	-1.58165	0.275556	1.11624e-09	8.42198e-08	TRUE	115992	ENSG00000158717	protein_coding	16	88696499	88706408	-1	RNF166	ring finger protein 166 [Source:HGNC Symbol;Acc:HGNC:28856]
ENSG00000158792.16	47.057	-1.14148	0.564154	0.00464557	0.0214738	TRUE	124044	ENSG00000158792	protein_coding	16	89696357	89701705	-1	SPATA2L	spermatogenesis associated 2 like [Source:HGNC Symbol;Acc:HGNC:28393]
ENSG00000158859.10	227.487	-1.20137	0.477575	0.00128143	0.00783163	TRUE	9507	ENSG00000158859	protein_coding	1	161184302	161199054	-1	ADAMTS4	ADAM metallopeptidase with thrombospondin type 1 motif 4 [Source:HGNC Symbol;Acc:HGNC:220]
ENSG00000159216.19	2087.87	1.02704	0.197478	3.53068e-08	1.57575e-06	TRUE	100506403	ENSG00000159216	protein_coding	21	34787801	36004667	-1	RUNX1	RUNX family transcription factor 1 [Source:HGNC Symbol;Acc:HGNC:10471]
ENSG00000159216.19	2087.87	1.02704	0.197478	3.53068e-08	1.57575e-06	TRUE	861	ENSG00000159216	protein_coding	21	34787801	36004667	-1	RUNX1	RUNX family transcription factor 1 [Source:HGNC Symbol;Acc:HGNC:10471]
ENSG00000159217.10	258.862	-1.8682	0.854581	0.00142146	0.00848587	TRUE	10642	ENSG00000159217	protein_coding	17	48997385	49056145	1	IGF2BP1	insulin like growth factor 2 mRNA binding protein 1 [Source:HGNC Symbol;Acc:HGNC:28866]
ENSG00000159239.13	4.22155	2.36559	0.735518	0.000126706	0.00124942	TRUE	NA	ENSG00000159239	protein_coding	2	74393836	74421662	-1		novel protein
ENSG00000159259.8	200.794	-1.55619	0.336884	3.88909e-07	1.17756e-05	TRUE	8208	ENSG00000159259	protein_coding	21	36385392	36419015	1	CHAF1B	chromatin assembly factor 1 subunit B [Source:HGNC Symbol;Acc:HGNC:1911]
ENSG00000159263.16	21.7849	-6.15372	1.15063	1.10926e-08	5.94765e-07	TRUE	6493	ENSG00000159263	protein_coding	21	36699115	36749917	1	SIM2	SIM bHLH transcription factor 2 [Source:HGNC Symbol;Acc:HGNC:10883]
ENSG00000159403.18	3904.95	1.47185	0.591783	0.000938583	0.00607443	TRUE	715	ENSG00000159403	protein_coding	12	7080214	7092540	-1	C1R	complement C1r [Source:HGNC Symbol;Acc:HGNC:1246]
ENSG00000159556.10	4.4344	-5.02122	1.45954	1.32898e-06	3.18667e-05	TRUE	64843	ENSG00000159556	protein_coding	15	76336773	76342475	1	ISL2	ISL LIM homeobox 2 [Source:HGNC Symbol;Acc:HGNC:18524]
ENSG00000159640.17	277.894	1.34824	0.351088	1.26673e-05	0.000198118	TRUE	1636	ENSG00000159640	protein_coding	17	63477061	63498380	1	ACE	angiotensin I converting enzyme [Source:HGNC Symbol;Acc:HGNC:2707]
ENSG00000159685.11	74.8481	-1.01968	0.239652	4.00171e-06	7.77937e-05	TRUE	84303	ENSG00000159685	protein_coding	3	126704240	126960420	1	CHCHD6	coiled-coil-helix-coiled-coil-helix domain containing 6 [Source:HGNC Symbol;Acc:HGNC:28184]
ENSG00000159753.14	33.3416	-3.33517	0.788986	1.18885e-06	2.93575e-05	TRUE	146206	ENSG00000159753	protein_coding	16	67644988	67657569	1	CARMIL2	capping protein regulator and myosin 1 linker 2 [Source:HGNC Symbol;Acc:HGNC:27089]
ENSG00000159788.20	304.124	-1.04202	0.247313	4.39917e-06	8.36601e-05	TRUE	6002	ENSG00000159788	protein_coding	4	3293021	3439913	1	RGS12	regulator of G protein signaling 12 [Source:HGNC Symbol;Acc:HGNC:9994]
ENSG00000160050.16	91.5824	-1.17584	0.256433	6.94573e-07	1.90395e-05	TRUE	79140	ENSG00000160050	protein_coding	1	32200595	32205453	1	CCDC28B	coiled-coil domain containing 28B [Source:HGNC Symbol;Acc:HGNC:28163]
ENSG00000160072.20	354.87	-1.51296	0.373193	4.96557e-06	9.2014e-05	TRUE	83858	ENSG00000160072	protein_coding	1	1471765	1497848	1	ATAD3B	ATPase family AAA domain containing 3B [Source:HGNC Symbol;Acc:HGNC:24007]
ENSG00000160131.14	552.471	1.03925	0.141863	4.49418e-14	1.23927e-11	TRUE	203547	ENSG00000160131	protein_coding	X	151396515	151409364	1	VMA21	vacuolar ATPase assembly factor VMA21 [Source:HGNC Symbol;Acc:HGNC:22082]
ENSG00000160161.9	8.07209	-1.5014	0.653612	0.00161774	0.00938198	TRUE	148113	ENSG00000160161	protein_coding	19	19538248	19546659	1	CILP2	cartilage intermediate layer protein 2 [Source:HGNC Symbol;Acc:HGNC:24213]
ENSG00000160221.18	107.877	-1.00533	0.649439	0.0132508	0.0484801	TRUE	8209	ENSG00000160221	protein_coding	21	44133610	44210114	1	GATD3A	glutamine amidotransferase class 1 domain containing 3A [Source:HGNC Symbol;Acc:HGNC:1273]
ENSG00000160226.16	168.703	-1.30504	0.346859	2.02193e-05	0.000285399	TRUE	755	ENSG00000160226	protein_coding	21	44328944	44339402	-1	CFAP410	cilia and flagella associated protein 410 [Source:HGNC Symbol;Acc:HGNC:1260]
ENSG00000160256.13	111.592	-1.48248	0.372101	7.21843e-06	0.000125137	TRUE	85395	ENSG00000160256	protein_coding	21	44940012	44976989	1	SLX9	SLX9 ribosome biogenesis factor [Source:HGNC Symbol;Acc:HGNC:15811]
ENSG00000160284.15	50.9115	-1.58256	0.670278	0.00126423	0.00775513	TRUE	84221	ENSG00000160284	protein_coding	21	46161148	46184476	-1	SPATC1L	spermatogenesis and centriole associated 1 like [Source:HGNC Symbol;Acc:HGNC:1298]
ENSG00000160298.18	117.807	-1.75535	0.403007	1.16837e-06	2.90374e-05	TRUE	54058	ENSG00000160298	protein_coding	21	46300181	46323875	-1	C21orf58	chromosome 21 open reading frame 58 [Source:HGNC Symbol;Acc:HGNC:1300]
ENSG00000160326.14	115.31	-1.41598	0.250668	2.06989e-09	1.41014e-07	TRUE	11182	ENSG00000160326	protein_coding	9	133471094	133479127	-1	SLC2A6	solute carrier family 2 member 6 [Source:HGNC Symbol;Acc:HGNC:11011]
ENSG00000160360.13	498.329	-1.10982	0.404785	0.000822975	0.00545893	TRUE	26086	ENSG00000160360	protein_coding	9	136327476	136359605	1	GPSM1	G protein signaling modulator 1 [Source:HGNC Symbol;Acc:HGNC:17858]
ENSG00000160404.18	78.8744	-1.06915	0.243637	2.03251e-06	4.43305e-05	TRUE	27433	ENSG00000160404	protein_coding	9	127731524	127735313	-1	TOR2A	torsin family 2 member A [Source:HGNC Symbol;Acc:HGNC:11996]
ENSG00000160446.19	223.472	-1.54429	0.396743	9.5905e-06	0.000156882	TRUE	84885	ENSG00000160446	protein_coding	9	128720870	128724127	-1	ZDHHC12	zinc finger DHHC-type palmitoyltransferase 12 [Source:HGNC Symbol;Acc:HGNC:19159]
ENSG00000160447.7	58.1574	-1.39884	0.407401	6.61637e-05	0.000742514	TRUE	29941	ENSG00000160447	protein_coding	9	128702503	128720916	1	PKN3	protein kinase N3 [Source:HGNC Symbol;Acc:HGNC:17999]
ENSG00000160469.17	75.4776	-1.19948	0.362444	0.000122201	0.00121378	TRUE	84446	ENSG00000160469	protein_coding	19	55282072	55312562	1	BRSK1	BR serine/threonine kinase 1 [Source:HGNC Symbol;Acc:HGNC:18994]
ENSG00000160712.13	130.804	1.54025	0.509302	0.000184033	0.00167891	TRUE	3570	ENSG00000160712	protein_coding	1	154405193	154469450	1	IL6R	interleukin 6 receptor [Source:HGNC Symbol;Acc:HGNC:6019]
ENSG00000160753.16	692.472	-1.17606	0.188532	6.98074e-11	8.12537e-09	TRUE	23623	ENSG00000160753	protein_coding	1	155320894	155331114	1	RUSC1	RUN and SH3 domain containing 1 [Source:HGNC Symbol;Acc:HGNC:17153]
ENSG00000160813.7	98.6809	-1.37963	0.357286	1.30401e-05	0.000202799	TRUE	221908	ENSG00000160813	protein_coding	7	100435282	100436497	-1	PPP1R35	protein phosphatase 1 regulatory subunit 35 [Source:HGNC Symbol;Acc:HGNC:28320]
ENSG00000160877.6	992.937	-1.43374	0.314477	5.64227e-07	1.58799e-05	TRUE	112939	ENSG00000160877	protein_coding	19	13116862	13141147	1	NACC1	nucleus accumbens associated 1 [Source:HGNC Symbol;Acc:HGNC:20967]
ENSG00000160949.18	143.305	-1.73251	0.401511	1.40933e-06	3.32056e-05	TRUE	4796	ENSG00000160949	protein_coding	8	144428775	144444440	-1	TONSL	tonsoku like, DNA repair protein [Source:HGNC Symbol;Acc:HGNC:7801]
ENSG00000160951.4	4.1607	-4.41884	1.88884	0.000245824	0.00212861	TRUE	5731	ENSG00000160951	protein_coding	19	14472466	14475354	-1	PTGER1	prostaglandin E receptor 1 [Source:HGNC Symbol;Acc:HGNC:9593]
ENSG00000160957.15	188.034	-2.02072	0.546047	1.51788e-05	0.000228898	TRUE	9401	ENSG00000160957	protein_coding	8	144511288	144517845	-1	RECQL4	RecQ like helicase 4 [Source:HGNC Symbol;Acc:HGNC:9949]
ENSG00000160991.17	986.483	-1.04763	0.280826	3.27985e-05	0.000423002	TRUE	80228	ENSG00000160991	protein_coding	7	102433106	102456825	1	ORAI2	ORAI calcium release-activated calcium modulator 2 [Source:HGNC Symbol;Acc:HGNC:21667]
ENSG00000161036.13	254.197	-1.6369	0.364043	6.45469e-07	1.79484e-05	TRUE	222229	ENSG00000161036	protein_coding	7	102464956	102473168	1	LRWD1	leucine rich repeats and WD repeat domain containing 1 [Source:HGNC Symbol;Acc:HGNC:21769]
ENSG00000161149.12	13.7633	-1.86528	0.348038	8.68397e-09	4.78921e-07	TRUE	113691	ENSG00000161149	lncRNA	22	21008193	21014292	-1	TUBA3FP	tubulin alpha 3f pseudogene [Source:HGNC Symbol;Acc:HGNC:24067]
ENSG00000161179.14	69.8995	-1.25357	0.318263	1.10677e-05	0.000175952	TRUE	150223	ENSG00000161179	protein_coding	22	21628089	21630064	-1	YDJC	YdjC chitooligosaccharide deacetylase homolog [Source:HGNC Symbol;Acc:HGNC:27158]
ENSG00000161180.11	3.41918	-1.13658	0.760566	0.0128996	0.0474426	TRUE	164592	ENSG00000161180	protein_coding	22	21632716	21637329	1	CCDC116	coiled-coil domain containing 116 [Source:HGNC Symbol;Acc:HGNC:26688]
ENSG00000161249.21	96.0036	1.66666	0.749593	0.00132754	0.0080436	TRUE	93099	ENSG00000161249	protein_coding	19	35497220	35513658	-1	DMKN	dermokine [Source:HGNC Symbol;Acc:HGNC:25063]
ENSG00000161618.10	127.432	-1.63929	0.37443	1.15921e-06	2.89028e-05	TRUE	126133	ENSG00000161618	protein_coding	19	49453225	49471050	1	ALDH16A1	aldehyde dehydrogenase 16 family member A1 [Source:HGNC Symbol;Acc:HGNC:28114]
ENSG00000161653.11	28.3239	-1.27927	0.331774	1.53592e-05	0.000230867	TRUE	162417	ENSG00000161653	protein_coding	17	44004622	44009068	1	NAGS	N-acetylglutamate synthase [Source:HGNC Symbol;Acc:HGNC:17996]
ENSG00000161677.12	183.455	-1.2847	0.512965	0.00122319	0.0075534	TRUE	126119	ENSG00000161677	protein_coding	19	50505998	50511220	-1	JOSD2	Josephin domain containing 2 [Source:HGNC Symbol;Acc:HGNC:28853]
ENSG00000161682.15	38.1078	-1.57442	0.403619	1.00296e-05	0.000162686	TRUE	284069	ENSG00000161682	protein_coding	17	44353215	44363853	-1	FAM171A2	family with sequence similarity 171 member A2 [Source:HGNC Symbol;Acc:HGNC:30480]
ENSG00000161692.18	149.949	-1.32192	0.449187	0.000339113	0.00274166	TRUE	80174	ENSG00000161692	protein_coding	17	44708608	44752264	1	DBF4B	DBF4 zinc finger B [Source:HGNC Symbol;Acc:HGNC:17883]
ENSG00000161800.13	1528.78	-1.76895	0.415252	1.66631e-06	3.79889e-05	TRUE	29127	ENSG00000161800	protein_coding	12	49976923	50033136	-1	RACGAP1	Rac GTPase activating protein 1 [Source:HGNC Symbol;Acc:HGNC:9804]
ENSG00000161835.11	28.3842	1.07742	0.367905	0.000481584	0.00360418	TRUE	160622	ENSG00000161835	protein_coding	12	52006946	52015889	1	TAMALIN	trafficking regulator and scaffold protein tamalin [Source:HGNC Symbol;Acc:HGNC:18707]
ENSG00000161847.14	228.334	-1.35626	0.455761	0.000294224	0.00244972	TRUE	125950	ENSG00000161847	protein_coding	19	10316212	10333638	-1	RAVER1	ribonucleoprotein, PTB binding 1 [Source:HGNC Symbol;Acc:HGNC:30296]
ENSG00000161888.12	205.637	-1.94058	0.515241	1.20721e-05	0.000190293	TRUE	147841	ENSG00000161888	protein_coding	19	11131520	11155807	-1	SPC24	SPC24 component of NDC80 kinetochore complex [Source:HGNC Symbol;Acc:HGNC:26913]
ENSG00000161939.19	122.245	1.35057	0.925409	0.00688075	0.0292868	TRUE	NA	ENSG00000161939	protein_coding	17	7012635	7017520	1	RNASEK-C17orf49	RNASEK-C17orf49 readthrough [Source:HGNC Symbol;Acc:HGNC:44419]
ENSG00000161940.11	16.1254	1.01163	0.553646	0.00766191	0.0318508	TRUE	255877	ENSG00000161940	protein_coding	17	7023050	7030290	1	BCL6B	BCL6B transcription repressor [Source:HGNC Symbol;Acc:HGNC:1002]
ENSG00000161980.6	131.461	-1.01192	0.218324	6.94543e-07	1.90395e-05	TRUE	51728	ENSG00000161980	protein_coding	16	46407	53608	-1	POLR3K	RNA polymerase III subunit K [Source:HGNC Symbol;Acc:HGNC:14121]
ENSG00000161996.19	169.865	-1.56718	0.386018	4.76519e-06	8.9329e-05	TRUE	197335	ENSG00000161996	protein_coding	16	649311	667833	1	WDR90	WD repeat domain 90 [Source:HGNC Symbol;Acc:HGNC:26960]
ENSG00000162004.19	9.00031	-1.77444	0.612246	0.000271276	0.00229915	TRUE	124093	ENSG00000162004	protein_coding	16	722582	726954	-1	CCDC78	coiled-coil domain containing 78 [Source:HGNC Symbol;Acc:HGNC:14153]
ENSG00000162062.15	50.0626	-2.09295	0.498878	2.21188e-06	4.75266e-05	TRUE	80178	ENSG00000162062	protein_coding	16	2460086	2464963	1	TEDC2	tubulin epsilon and delta complex 2 [Source:HGNC Symbol;Acc:HGNC:25849]
ENSG00000162063.13	346.703	-2.22242	0.50884	8.52686e-07	2.24952e-05	TRUE	899	ENSG00000162063	protein_coding	16	2429394	2458854	1	CCNF	cyclin F [Source:HGNC Symbol;Acc:HGNC:1591]
ENSG00000162066.16	132.972	-1.31888	0.508232	0.000929514	0.00602416	TRUE	51005	ENSG00000162066	protein_coding	16	2520357	2531422	1	AMDHD2	amidohydrolase domain containing 2 [Source:HGNC Symbol;Acc:HGNC:24262]
ENSG00000162073.14	187.459	-1.23954	0.454821	0.000715782	0.00492709	TRUE	124222	ENSG00000162073	protein_coding	16	2969270	2973484	1	PAQR4	progestin and adipoQ receptor family member 4 [Source:HGNC Symbol;Acc:HGNC:26386]
ENSG00000162076.13	171.317	-1.1349	0.307851	3.43463e-05	0.000437582	TRUE	114984	ENSG00000162076	protein_coding	16	2883213	2899382	1	FLYWCH2	FLYWCH family member 2 [Source:HGNC Symbol;Acc:HGNC:25178]
ENSG00000162174.12	3.14301	-2.90303	1.30347	0.000429625	0.00329954	TRUE	80150	ENSG00000162174	protein_coding	11	62337448	62393412	1	ASRGL1	asparaginase and isoaspartyl peptidase 1 [Source:HGNC Symbol;Acc:HGNC:16448]
ENSG00000162302.13	628.336	-1.04014	0.242669	3.24802e-06	6.5649e-05	TRUE	8986	ENSG00000162302	protein_coding	11	64359148	64372215	1	RPS6KA4	ribosomal protein S6 kinase A4 [Source:HGNC Symbol;Acc:HGNC:10433]
ENSG00000162337.12	362.782	-1.01016	0.513831	0.00634203	0.0274735	TRUE	4041	ENSG00000162337	protein_coding	11	68312591	68449275	1	LRP5	LDL receptor related protein 5 [Source:HGNC Symbol;Acc:HGNC:6697]
ENSG00000162383.13	50.3107	1.56801	0.52538	0.000206161	0.00184803	TRUE	6512	ENSG00000162383	protein_coding	1	53087179	53142638	-1	SLC1A7	solute carrier family 1 member 7 [Source:HGNC Symbol;Acc:HGNC:10945]
ENSG00000162390.18	102.812	-1.25682	0.323736	1.26207e-05	0.000197656	TRUE	26027	ENSG00000162390	protein_coding	1	54542257	54639192	1	ACOT11	acyl-CoA thioesterase 11 [Source:HGNC Symbol;Acc:HGNC:18156]
ENSG00000162407.9	9395.28	2.09747	0.348082	1.31346e-10	1.43508e-08	TRUE	8613	ENSG00000162407	protein_coding	1	56494761	56645301	-1	PLPP3	phospholipid phosphatase 3 [Source:HGNC Symbol;Acc:HGNC:9229]
ENSG00000162409.12	42.529	1.4134	0.481832	0.000283428	0.0023795	TRUE	5563	ENSG00000162409	protein_coding	1	56645314	56715335	1	PRKAA2	protein kinase AMP-activated catalytic subunit alpha 2 [Source:HGNC Symbol;Acc:HGNC:9377]
ENSG00000162415.7	1.86664	2.08158	1.698	0.00774141	0.0320892	TRUE	57643	ENSG00000162415	protein_coding	1	45016399	45306209	-1	ZSWIM5	zinc finger SWIM-type containing 5 [Source:HGNC Symbol;Acc:HGNC:29299]
ENSG00000162493.17	155.629	2.89197	0.785154	9.01236e-06	0.000149216	TRUE	10630	ENSG00000162493	protein_coding	1	13583465	13617957	1	PDPN	podoplanin [Source:HGNC Symbol;Acc:HGNC:29602]
ENSG00000162552.15	41.4007	2.46882	1.46019	0.00180063	0.0102123	TRUE	54361	ENSG00000162552	protein_coding	1	22117313	22143969	-1	WNT4	Wnt family member 4 [Source:HGNC Symbol;Acc:HGNC:12783]
ENSG00000162585.17	413.259	-1.64102	0.421145	8.43268e-06	0.000141746	TRUE	199990	ENSG00000162585	protein_coding	1	2184461	2212720	-1	FAAP20	FA core complex associated protein 20 [Source:HGNC Symbol;Acc:HGNC:26428]
ENSG00000162595.8	469.043	-5.1893	1.04213	2.92757e-08	1.35623e-06	TRUE	9077	ENSG00000162595	protein_coding	1	68045886	68051717	-1	DIRAS3	DIRAS family GTPase 3 [Source:HGNC Symbol;Acc:HGNC:687]
ENSG00000162600.12	106.705	1.03479	0.268115	1.82162e-05	0.000262565	TRUE	115209	ENSG00000162600	protein_coding	1	58415384	58546802	-1	OMA1	OMA1 zinc metallopeptidase [Source:HGNC Symbol;Acc:HGNC:29661]
ENSG00000162630.6	137.571	2.2776	1.01255	0.000792716	0.00529919	TRUE	8707	ENSG00000162630	protein_coding	1	193178730	193186613	-1	B3GALT2	beta-1,3-galactosyltransferase 2 [Source:HGNC Symbol;Acc:HGNC:917]
ENSG00000162643.13	27.0442	1.48229	0.587126	0.000772951	0.00520758	TRUE	126820	ENSG00000162643	protein_coding	1	84999147	85133138	1	DNAI3	dynein axonemal intermediate chain 3 [Source:HGNC Symbol;Acc:HGNC:30711]
ENSG00000162688.17	567.486	1.18445	0.212737	3.59904e-09	2.21126e-07	TRUE	178	ENSG00000162688	protein_coding	1	99850361	99924023	1	AGL	amylo-alpha-1, 6-glucosidase, 4-alpha-glucanotransferase [Source:HGNC Symbol;Acc:HGNC:321]
ENSG00000162695.12	767.221	1.61896	0.201591	8.77461e-17	4.2343e-14	TRUE	148867	ENSG00000162695	protein_coding	1	100896076	100981757	1	SLC30A7	solute carrier family 30 member 7 [Source:HGNC Symbol;Acc:HGNC:19306]
ENSG00000162706.13	113.249	6.46108	1.59956	4.91098e-07	1.41837e-05	TRUE	57863	ENSG00000162706	protein_coding	1	159171609	159203313	1	CADM3	cell adhesion molecule 3 [Source:HGNC Symbol;Acc:HGNC:17601]
ENSG00000162711.18	3.11728	-1.63634	1.26135	0.00730067	0.0307185	TRUE	114548	ENSG00000162711	protein_coding	1	247416156	247449108	1	NLRP3	NLR family pyrin domain containing 3 [Source:HGNC Symbol;Acc:HGNC:16400]
ENSG00000162723.10	23.5094	-2.20274	1.10007	0.00159677	0.00928362	TRUE	89886	ENSG00000162723	protein_coding	1	159951492	159954237	-1	SLAMF9	SLAM family member 9 [Source:HGNC Symbol;Acc:HGNC:18430]
ENSG00000162729.14	250.481	-1.09019	0.356189	0.000325277	0.00264829	TRUE	93185	ENSG00000162729	protein_coding	1	160091340	160098943	-1	IGSF8	immunoglobulin superfamily member 8 [Source:HGNC Symbol;Acc:HGNC:17813]
ENSG00000162757.4	118.208	-1.08653	0.280467	1.67297e-05	0.00024557	TRUE	148304	ENSG00000162757	protein_coding	1	209779208	209784559	-1	C1orf74	chromosome 1 open reading frame 74 [Source:HGNC Symbol;Acc:HGNC:26319]
ENSG00000162817.7	15.3981	2.08895	1.29214	0.00287622	0.0147557	TRUE	79762	ENSG00000162817	protein_coding	1	220690363	220699153	1	C1orf115	chromosome 1 open reading frame 115 [Source:HGNC Symbol;Acc:HGNC:25873]
ENSG00000162819.12	903.277	1.00423	0.17313	1.23367e-09	9.21788e-08	TRUE	148362	ENSG00000162819	protein_coding	1	222712553	222735196	1	BROX	BRO1 domain and CAAX motif containing [Source:HGNC Symbol;Acc:HGNC:26512]
ENSG00000162840.4	6.96996	-3.81985	0.859604	1.05116e-06	2.67268e-05	TRUE	NA	ENSG00000162840	processed_pseudogene	4	68376323	68376505	1	MT2P1	metallothionein 2 pseudogene 1 [Source:HGNC Symbol;Acc:HGNC:7407]
ENSG00000162892.16	8.55106	-1.28587	1.15319	0.0120276	0.0448986	TRUE	11009	ENSG00000162892	protein_coding	1	206897443	206904139	1	IL24	interleukin 24 [Source:HGNC Symbol;Acc:HGNC:11346]
ENSG00000162910.19	245.984	-1.24069	0.334689	2.69594e-05	0.000363059	TRUE	128308	ENSG00000162910	protein_coding	1	228106679	228109312	-1	MRPL55	mitochondrial ribosomal protein L55 [Source:HGNC Symbol;Acc:HGNC:16686]
ENSG00000162975.5	4.26326	-2.32956	1.30364	0.00336406	0.0166393	TRUE	3754	ENSG00000162975	protein_coding	2	10911934	10914225	1	KCNF1	potassium voltage-gated channel modifier subfamily F member 1 [Source:HGNC Symbol;Acc:HGNC:6246]
ENSG00000163071.11	662.104	1.76115	0.406487	1.13261e-06	2.83006e-05	TRUE	132671	ENSG00000163071	protein_coding	4	52051304	52097299	1	SPATA18	spermatogenesis associated 18 [Source:HGNC Symbol;Acc:HGNC:29579]
ENSG00000163207.7	3.63937	-1.69904	1.01383	0.00527758	0.0237691	TRUE	3713	ENSG00000163207	protein_coding	1	152908546	152911886	1	IVL	involucrin [Source:HGNC Symbol;Acc:HGNC:6187]
ENSG00000163380.16	6.06632	2.28863	0.593941	1.27523e-05	0.000199313	TRUE	56203	ENSG00000163380	protein_coding	3	69106065	69123032	-1	LMOD3	leiomodin 3 [Source:HGNC Symbol;Acc:HGNC:6649]
ENSG00000163412.13	135.29	1.83659	0.329358	1.88148e-09	1.30873e-07	TRUE	317649	ENSG00000163412	protein_coding	3	71675414	71754773	-1	EIF4E3	eukaryotic translation initiation factor 4E family member 3 [Source:HGNC Symbol;Acc:HGNC:31837]
ENSG00000163428.4	1051.79	1.05813	0.154566	1.34535e-12	2.61868e-10	TRUE	116064	ENSG00000163428	protein_coding	3	120324509	120349354	-1	LRRC58	leucine rich repeat containing 58 [Source:HGNC Symbol;Acc:HGNC:26968]
ENSG00000163507.15	402.874	-1.1355	0.488794	0.00235302	0.012634	TRUE	57650	ENSG00000163507	protein_coding	3	108549864	108589644	-1	CIP2A	cellular inhibitor of PP2A [Source:HGNC Symbol;Acc:HGNC:29302]
ENSG00000163602.12	960.231	1.55176	0.218983	1.3411e-13	3.41361e-11	TRUE	23429	ENSG00000163602	protein_coding	3	72371825	72446621	-1	RYBP	RING1 and YY1 binding protein [Source:HGNC Symbol;Acc:HGNC:10480]
ENSG00000163618.18	211.341	2.03489	0.858603	0.000705433	0.00487178	TRUE	8618	ENSG00000163618	protein_coding	3	62398346	62875416	-1	CADPS	calcium dependent secretion activator [Source:HGNC Symbol;Acc:HGNC:1426]
ENSG00000163638.13	57.5095	-1.07659	0.47923	0.00309846	0.0156478	TRUE	56999	ENSG00000163638	protein_coding	3	64515654	64688000	-1	ADAMTS9	ADAM metallopeptidase with thrombospondin type 1 motif 9 [Source:HGNC Symbol;Acc:HGNC:13202]
ENSG00000163661.4	6164.06	1.12637	1.32058	0.0137117	0.0497732	TRUE	5806	ENSG00000163661	protein_coding	3	157436850	157443633	1	PTX3	pentraxin 3 [Source:HGNC Symbol;Acc:HGNC:9692]
ENSG00000163808.17	237.222	-1.88952	0.471678	4.70055e-06	8.85194e-05	TRUE	56992	ENSG00000163808	protein_coding	3	44761721	44873376	1	KIF15	kinesin family member 15 [Source:HGNC Symbol;Acc:HGNC:17273]
ENSG00000163820.16	632.845	1.41093	0.203916	4.89665e-13	1.0802e-10	TRUE	79443	ENSG00000163820	protein_coding	3	45917903	45995824	-1	FYCO1	FYVE and coiled-coil domain autophagy adaptor 1 [Source:HGNC Symbol;Acc:HGNC:14673]
ENSG00000163827.14	403.279	2.14031	0.457033	1.76092e-07	5.98067e-06	TRUE	79442	ENSG00000163827	protein_coding	3	46515385	46606948	-1	LRRC2	leucine rich repeat containing 2 [Source:HGNC Symbol;Acc:HGNC:14676]
ENSG00000163898.10	2.95878	2.53526	1.06398	0.000910194	0.00591716	TRUE	200879	ENSG00000163898	protein_coding	3	185506262	185552588	-1	LIPH	lipase H [Source:HGNC Symbol;Acc:HGNC:18483]
ENSG00000163918.12	272.119	-1.243	0.327459	1.88655e-05	0.000270076	TRUE	5984	ENSG00000163918	protein_coding	3	186789880	186807058	-1	RFC4	replication factor C subunit 4 [Source:HGNC Symbol;Acc:HGNC:9972]
ENSG00000163923.10	125.454	-1.31172	0.389281	8.55065e-05	0.000908943	TRUE	116832	ENSG00000163923	protein_coding	3	187120948	187180908	-1	RPL39L	ribosomal protein L39 like [Source:HGNC Symbol;Acc:HGNC:17094]
ENSG00000163975.13	114.711	-1.07281	0.330877	0.00018473	0.00168262	TRUE	4241	ENSG00000163975	protein_coding	3	196980590	197029817	-1	MELTF	melanotransferrin [Source:HGNC Symbol;Acc:HGNC:7037]
ENSG00000164032.12	2846.02	-1.27011	0.383879	0.000108727	0.00110458	TRUE	3015	ENSG00000164032	protein_coding	4	99948086	99950355	-1	H2AZ1	H2A.Z variant histone 1 [Source:HGNC Symbol;Acc:HGNC:4741]
ENSG00000164040.18	2973.3	1.52662	0.256243	2.81184e-10	2.65839e-08	TRUE	10424	ENSG00000164040	protein_coding	4	128269237	128288829	-1	PGRMC2	progesterone receptor membrane component 2 [Source:HGNC Symbol;Acc:HGNC:16089]
ENSG00000164045.12	137.527	-1.48463	0.434027	6.00128e-05	0.000688048	TRUE	993	ENSG00000164045	protein_coding	3	48157146	48188417	-1	CDC25A	cell division cycle 25A [Source:HGNC Symbol;Acc:HGNC:1725]
ENSG00000164087.8	239.705	-1.82851	0.442814	2.90557e-06	6.01647e-05	TRUE	25886	ENSG00000164087	protein_coding	3	52075226	52154690	-1	POC1A	POC1 centriolar protein A [Source:HGNC Symbol;Acc:HGNC:24488]
ENSG00000164093.18	437.884	-1.58474	0.594835	0.000564488	0.00408728	TRUE	5308	ENSG00000164093	protein_coding	4	110617423	110642123	-1	PITX2	paired like homeodomain 2 [Source:HGNC Symbol;Acc:HGNC:9005]
ENSG00000164104.12	1660.99	-1.35129	0.384848	4.83382e-05	0.000578037	TRUE	3148	ENSG00000164104	protein_coding	4	173331376	173334432	-1	HMGB2	high mobility group box 2 [Source:HGNC Symbol;Acc:HGNC:5000]
ENSG00000164109.14	412.647	-1.26545	0.446775	0.000503099	0.00373024	TRUE	4085	ENSG00000164109	protein_coding	4	120055623	120066858	-1	MAD2L1	mitotic arrest deficient 2 like 1 [Source:HGNC Symbol;Acc:HGNC:6763]
ENSG00000164112.14	114.848	1.69668	0.637123	0.000444968	0.00339151	TRUE	132332	ENSG00000164112	protein_coding	4	121758881	121765427	-1	SMIM43	small integral membrane protein 43 [Source:HGNC Symbol;Acc:HGNC:55077]
ENSG00000164124.11	24.8083	1.13801	0.592187	0.00460363	0.0213353	TRUE	55314	ENSG00000164124	protein_coding	4	158201604	158255416	1	TMEM144	transmembrane protein 144 [Source:HGNC Symbol;Acc:HGNC:25633]
ENSG00000164125.16	667.03	2.05475	0.563805	1.50681e-05	0.000227525	TRUE	51313	ENSG00000164125	protein_coding	4	158124474	158173318	-1	GASK1B	golgi associated kinase 1B [Source:HGNC Symbol;Acc:HGNC:25312]
ENSG00000164136.17	90.5841	1.79398	0.461929	7.19026e-06	0.000124849	TRUE	3600	ENSG00000164136	protein_coding	4	141636583	141733987	1	IL15	interleukin 15 [Source:HGNC Symbol;Acc:HGNC:5977]
ENSG00000164188.9	5.16797	1.93248	0.959784	0.00190617	0.0106827	TRUE	202151	ENSG00000164188	protein_coding	5	36246913	36302114	-1	RANBP3L	RAN binding protein 3 like [Source:HGNC Symbol;Acc:HGNC:26353]
ENSG00000164251.5	30.5722	-1.53523	1.32562	0.00792288	0.0327009	TRUE	2150	ENSG00000164251	protein_coding	5	76818933	76835315	1	F2RL1	F2R like trypsin receptor 1 [Source:HGNC Symbol;Acc:HGNC:3538]
ENSG00000164330.17	340.97	2.01706	0.389202	1.49286e-08	7.68425e-07	TRUE	1879	ENSG00000164330	protein_coding	5	158695916	159099916	-1	EBF1	EBF transcription factor 1 [Source:HGNC Symbol;Acc:HGNC:3126]
ENSG00000164342.13	29.7108	2.46863	0.829031	0.000120508	0.00119903	TRUE	7098	ENSG00000164342	protein_coding	4	186069155	186088073	1	TLR3	toll like receptor 3 [Source:HGNC Symbol;Acc:HGNC:11849]
ENSG00000164463.12	383.977	1.16246	0.200246	9.3029e-10	7.27983e-08	TRUE	153222	ENSG00000164463	protein_coding	5	173056352	173139284	1	CREBRF	CREB3 regulatory factor [Source:HGNC Symbol;Acc:HGNC:24050]
ENSG00000164603.12	550.732	1.29988	0.2937	1.07696e-06	2.72034e-05	TRUE	154743	ENSG00000164603	protein_coding	7	112819147	112939875	-1	BMT2	base methyltransferase of 25S rRNA 2 homolog [Source:HGNC Symbol;Acc:HGNC:26475]
ENSG00000164611.13	719.833	-1.97304	0.538844	1.72751e-05	0.000251979	TRUE	9232	ENSG00000164611	protein_coding	5	160421855	160428739	1	PTTG1	PTTG1 regulator of sister chromatid separation, securin [Source:HGNC Symbol;Acc:HGNC:9690]
ENSG00000164615.6	565.29	1.06575	0.1721	1.02061e-10	1.14205e-08	TRUE	819	ENSG00000164615	protein_coding	5	134738495	134752157	1	CAMLG	calcium modulating ligand [Source:HGNC Symbol;Acc:HGNC:1471]
ENSG00000164619.10	1496.78	1.35202	0.398747	7.41486e-05	0.000810909	TRUE	168667	ENSG00000164619	protein_coding	7	33904308	34156427	1	BMPER	BMP binding endothelial regulator [Source:HGNC Symbol;Acc:HGNC:24154]
ENSG00000164620.9	56.1071	-1.12944	0.426823	0.00107601	0.0068209	TRUE	285613	ENSG00000164620	protein_coding	5	141636950	141641064	1	RELL2	RELT like 2 [Source:HGNC Symbol;Acc:HGNC:26902]
ENSG00000164659.15	329.728	1.97621	0.673779	0.000169666	0.00157641	TRUE	222223	ENSG00000164659	protein_coding	7	86876906	87059654	-1	ELAPOR2	endosome-lysosome associated apoptosis and autophagy regulator family member 2 [Source:HGNC Symbol;Acc:HGNC:21945]
ENSG00000164674.17	131.818	-1.42509	0.429223	8.52077e-05	0.000906183	TRUE	94120	ENSG00000164674	protein_coding	6	158650014	158764876	1	SYTL3	synaptotagmin like 3 [Source:HGNC Symbol;Acc:HGNC:15587]
ENSG00000164684.13	19.827	1.49147	1.05965	0.00403192	0.0192679	TRUE	619279	ENSG00000164684	protein_coding	8	80628451	80874781	-1	ZNF704	zinc finger protein 704 [Source:HGNC Symbol;Acc:HGNC:32291]
ENSG00000164687.11	103.073	-1.88875	0.661015	0.000268458	0.00227943	TRUE	2171	ENSG00000164687	protein_coding	8	81280536	81284777	1	FABP5	fatty acid binding protein 5 [Source:HGNC Symbol;Acc:HGNC:3560]
ENSG00000164694.17	671.769	-1.13098	0.648972	0.00738546	0.0309628	TRUE	84624	ENSG00000164694	protein_coding	6	159169400	159272108	1	FNDC1	fibronectin type III domain containing 1 [Source:HGNC Symbol;Acc:HGNC:21184]
ENSG00000164695.5	3.27784	-3.97149	1.9062	0.000547384	0.00398838	TRUE	92421	ENSG00000164695	protein_coding	8	81732448	81759515	1	CHMP4C	charged multivesicular body protein 4C [Source:HGNC Symbol;Acc:HGNC:30599]
ENSG00000164761.9	7404.85	2.48172	0.781204	7.0746e-05	0.000777736	TRUE	4982	ENSG00000164761	protein_coding	8	118923557	118951885	-1	TNFRSF11B	TNF receptor superfamily member 11b [Source:HGNC Symbol;Acc:HGNC:11909]
ENSG00000164880.16	827.425	-1.26756	0.368931	7.04638e-05	0.00077501	TRUE	26173	ENSG00000164880	protein_coding	7	1470277	1504389	-1	INTS1	integrator complex subunit 1 [Source:HGNC Symbol;Acc:HGNC:24555]
ENSG00000164889.15	1591.38	-1.15574	0.345416	0.000112144	0.00113234	TRUE	6522	ENSG00000164889	protein_coding	7	151057210	151076526	1	SLC4A2	solute carrier family 4 member 2 [Source:HGNC Symbol;Acc:HGNC:11028]
ENSG00000164897.14	232.636	-1.2189	0.417909	0.000418337	0.00323321	TRUE	83590	ENSG00000164897	protein_coding	7	151081085	151083493	-1	TMUB1	transmembrane and ubiquitin like domain containing 1 [Source:HGNC Symbol;Acc:HGNC:21709]
ENSG00000164938.14	690.425	2.13556	0.273156	3.66125e-16	1.57047e-13	TRUE	94241	ENSG00000164938	protein_coding	8	94925972	94949378	-1	TP53INP1	tumor protein p53 inducible nuclear protein 1 [Source:HGNC Symbol;Acc:HGNC:18022]
ENSG00000164983.8	433.529	1.14745	0.259887	1.43143e-06	3.36611e-05	TRUE	157378	ENSG00000164983	protein_coding	8	124306189	124372701	-1	TMEM65	transmembrane protein 65 [Source:HGNC Symbol;Acc:HGNC:25203]
ENSG00000165029.17	591.34	2.21847	0.415369	5.70766e-09	3.32875e-07	TRUE	19	ENSG00000165029	protein_coding	9	104781006	104928155	-1	ABCA1	ATP binding cassette subfamily A member 1 [Source:HGNC Symbol;Acc:HGNC:29]
ENSG00000165061.15	17.4972	-1.4431	2.19815	0.0101774	0.0395336	TRUE	79698	ENSG00000165061	protein_coding	8	40530590	40897833	-1	ZMAT4	zinc finger matrin-type 4 [Source:HGNC Symbol;Acc:HGNC:25844]
ENSG00000165124.19	3813.32	3.26921	0.651881	2.38689e-08	1.1456e-06	TRUE	79987	ENSG00000165124	protein_coding	9	110365248	110579880	-1	SVEP1	sushi, von Willebrand factor type A, EGF and pentraxin domain containing 1 [Source:HGNC Symbol;Acc:HGNC:15985]
ENSG00000165185.15	210.668	1.09596	0.305852	4.83959e-05	0.000578429	TRUE	158405	ENSG00000165185	protein_coding	9	112486827	112669397	1	KIAA1958	KIAA1958 [Source:HGNC Symbol;Acc:HGNC:23427]
ENSG00000165233.18	203.999	-1.16378	0.296518	1.32149e-05	0.00020461	TRUE	84270	ENSG00000165233	protein_coding	9	93096217	93113283	1	CARD19	caspase recruitment domain family member 19 [Source:HGNC Symbol;Acc:HGNC:28148]
ENSG00000165304.8	705.725	-1.5103	0.42224	3.23855e-05	0.000419075	TRUE	9833	ENSG00000165304	protein_coding	9	36572862	36677683	1	MELK	maternal embryonic leucine zipper kinase [Source:HGNC Symbol;Acc:HGNC:16870]
ENSG00000165312.7	81.8617	1.22589	0.289421	2.91156e-06	6.02106e-05	TRUE	220213	ENSG00000165312	protein_coding	10	23439075	23442377	1	OTUD1	OTU deubiquitinase 1 [Source:HGNC Symbol;Acc:HGNC:27346]
ENSG00000165322.18	1046.14	1.05517	0.190835	5.53397e-09	3.23695e-07	TRUE	94134	ENSG00000165322	protein_coding	10	31805398	31928876	-1	ARHGAP12	Rho GTPase activating protein 12 [Source:HGNC Symbol;Acc:HGNC:16348]
ENSG00000165449.12	3.01114	-2.09119	1.97186	0.00641573	0.0277305	TRUE	220963	ENSG00000165449	protein_coding	10	59650764	59736002	-1	SLC16A9	solute carrier family 16 member 9 [Source:HGNC Symbol;Acc:HGNC:23520]
ENSG00000165480.16	257.917	-1.84626	0.52535	3.22301e-05	0.000417298	TRUE	221150	ENSG00000165480	protein_coding	13	21153595	21176552	-1	SKA3	spindle and kinetochore associated complex subunit 3 [Source:HGNC Symbol;Acc:HGNC:20262]
ENSG00000165490.13	126.19	-1.06111	0.592959	0.00798524	0.0328881	TRUE	220042	ENSG00000165490	protein_coding	11	82899975	82958277	1	DDIAS	DNA damage induced apoptosis suppressor [Source:HGNC Symbol;Acc:HGNC:26351]
ENSG00000165633.13	1363.45	1.14806	0.287937	9.22008e-06	0.000151895	TRUE	196740	ENSG00000165633	protein_coding	10	49014236	49115522	-1	VSTM4	V-set and transmembrane domain containing 4 [Source:HGNC Symbol;Acc:HGNC:26470]
ENSG00000165644.11	22.0078	-1.90127	0.528815	2.26611e-05	0.000314122	TRUE	118881	ENSG00000165644	protein_coding	10	75233641	75236030	-1	COMTD1	catechol-O-methyltransferase domain containing 1 [Source:HGNC Symbol;Acc:HGNC:26309]
ENSG00000165724.6	274.197	-1.03002	0.291934	7.25568e-05	0.000795002	TRUE	116225	ENSG00000165724	protein_coding	9	137582081	137590512	-1	ZMYND19	zinc finger MYND-type containing 19 [Source:HGNC Symbol;Acc:HGNC:21146]
ENSG00000165807.8	25.9996	1.19369	0.286285	4.22391e-06	8.11264e-05	TRUE	145376	ENSG00000165807	protein_coding	14	64549920	64589381	1	PPP1R36	protein phosphatase 1 regulatory subunit 36 [Source:HGNC Symbol;Acc:HGNC:20097]
ENSG00000165863.17	7.47895	-2.79761	1.19419	0.000607759	0.00432357	TRUE	143379	ENSG00000165863	protein_coding	10	116663696	116670264	-1	C10orf82	chromosome 10 open reading frame 82 [Source:HGNC Symbol;Acc:HGNC:28500]
ENSG00000165886.5	197.164	-1.46351	0.460834	0.000140746	0.0013533	TRUE	80019	ENSG00000165886	protein_coding	10	97498924	97571206	1	UBTD1	ubiquitin domain containing 1 [Source:HGNC Symbol;Acc:HGNC:25683]
ENSG00000165891.16	508.006	-1.22754	0.503451	0.00153312	0.00899252	TRUE	144455	ENSG00000165891	protein_coding	12	77021248	77065569	-1	E2F7	E2F transcription factor 7 [Source:HGNC Symbol;Acc:HGNC:23820]
ENSG00000165929.13	8.58528	1.52145	0.962176	0.00523752	0.0236439	TRUE	123036	ENSG00000165929	protein_coding	14	91779746	91867536	-1	TC2N	tandem C2 domains, nuclear [Source:HGNC Symbol;Acc:HGNC:19859]
ENSG00000165997.5	375.421	1.45734	0.188192	1.0099e-15	3.9648e-13	TRUE	221079	ENSG00000165997	protein_coding	10	18659431	18681639	1	ARL5B	ADP ribosylation factor like GTPase 5B [Source:HGNC Symbol;Acc:HGNC:23052]
ENSG00000166035.11	37.1065	1.50463	0.770296	0.00286308	0.0147111	TRUE	3990	ENSG00000166035	protein_coding	15	58410569	58569844	1	LIPC	lipase C, hepatic type [Source:HGNC Symbol;Acc:HGNC:6619]
ENSG00000166046.11	173.648	1.54171	0.225249	6.88295e-13	1.41088e-10	TRUE	255394	ENSG00000166046	protein_coding	12	106301929	106347003	1	TCP11L2	t-complex 11 like 2 [Source:HGNC Symbol;Acc:HGNC:28627]
ENSG00000166106.4	33.3639	-1.87853	0.736021	0.000624757	0.0044187	TRUE	170689	ENSG00000166106	protein_coding	11	130448645	130476645	1	ADAMTS15	ADAM metallopeptidase with thrombospondin type 1 motif 15 [Source:HGNC Symbol;Acc:HGNC:16305]
ENSG00000166166.13	186.677	-1.06014	0.333567	0.000237098	0.00206307	TRUE	115708	ENSG00000166166	protein_coding	14	103529196	103537073	1	TRMT61A	tRNA methyltransferase 61A [Source:HGNC Symbol;Acc:HGNC:23790]
ENSG00000166275.16	431.926	1.36249	0.158268	9.01735e-19	8.70287e-16	TRUE	119032	ENSG00000166275	protein_coding	10	102854259	102864961	1	BORCS7	BLOC-1 related complex subunit 7 [Source:HGNC Symbol;Acc:HGNC:23516]
ENSG00000166278.15	98.6748	2.99835	1.31466	0.000529218	0.00387675	TRUE	717	ENSG00000166278	protein_coding	6	31897785	31945672	1	C2	complement C2 [Source:HGNC Symbol;Acc:HGNC:1248]
ENSG00000166377.21	243.114	1.11679	0.243766	6.47636e-07	1.7987e-05	TRUE	374868	ENSG00000166377	protein_coding	18	79069285	79378287	1	ATP9B	ATPase phospholipid transporting 9B (putative) [Source:HGNC Symbol;Acc:HGNC:13541]
ENSG00000166451.14	597.075	-1.27829	0.371103	6.71636e-05	0.000749595	TRUE	55839	ENSG00000166451	protein_coding	16	81006552	81033114	1	CENPN	centromere protein N [Source:HGNC Symbol;Acc:HGNC:30873]
ENSG00000166473.17	8.35955	3.98925	1.4656	0.000170594	0.00158249	TRUE	114780	ENSG00000166473	polymorphic_pseudogene	16	81100875	81220370	-1	PKD1L2	polycystin 1 like 2 (gene/pseudogene) [Source:HGNC Symbol;Acc:HGNC:21715]
ENSG00000166508.18	1324.63	-1.23817	0.366472	8.92964e-05	0.000941882	TRUE	4176	ENSG00000166508	protein_coding	7	100092728	100101940	-1	MCM7	minichromosome maintenance complex component 7 [Source:HGNC Symbol;Acc:HGNC:6950]
ENSG00000166670.10	31.9275	-1.93117	1.03096	0.00242362	0.0129156	TRUE	4319	ENSG00000166670	protein_coding	11	102770502	102780628	-1	MMP10	matrix metallopeptidase 10 [Source:HGNC Symbol;Acc:HGNC:7156]
ENSG00000166710.22	23837.5	1.15005	0.175452	7.23712e-12	1.2051e-09	TRUE	567	ENSG00000166710	protein_coding	15	44711487	44718851	1	B2M	beta-2-microglobulin [Source:HGNC Symbol;Acc:HGNC:914]
ENSG00000166813.16	582.418	-1.02115	0.282034	5.15552e-05	0.000607083	TRUE	374654	ENSG00000166813	protein_coding	15	89608789	89655467	-1	KIF7	kinesin family member 7 [Source:HGNC Symbol;Acc:HGNC:30497]
ENSG00000166816.15	18.2075	-1.63583	0.584614	0.000356909	0.00285072	TRUE	197257	ENSG00000166816	protein_coding	16	75111860	75116780	-1	LDHD	lactate dehydrogenase D [Source:HGNC Symbol;Acc:HGNC:19708]
ENSG00000166851.15	631.477	-2.51648	0.560053	4.38148e-07	1.2978e-05	TRUE	5347	ENSG00000166851	protein_coding	16	23677656	23690367	1	PLK1	polo like kinase 1 [Source:HGNC Symbol;Acc:HGNC:9077]
ENSG00000166922.9	227.494	1.34719	0.444734	0.000235203	0.00205138	TRUE	6447	ENSG00000166922	protein_coding	15	32641676	32697098	1	SCG5	secretogranin V [Source:HGNC Symbol;Acc:HGNC:10816]
ENSG00000166979.13	52.4975	-1.01974	0.406695	0.00192267	0.0107598	TRUE	59271	ENSG00000166979	protein_coding	21	32412006	32515397	1	EVA1C	eva-1 homolog C [Source:HGNC Symbol;Acc:HGNC:13239]
ENSG00000167034.10	266.635	-1.67701	0.444211	1.31725e-05	0.000204339	TRUE	4824	ENSG00000167034	protein_coding	8	23678697	23682938	-1	NKX3-1	NK3 homeobox 1 [Source:HGNC Symbol;Acc:HGNC:7838]
ENSG00000167100.15	53.3114	-1.38183	0.505623	0.000562139	0.00407283	TRUE	201191	ENSG00000167100	protein_coding	17	50110040	50130160	-1	SAMD14	sterile alpha motif domain containing 14 [Source:HGNC Symbol;Acc:HGNC:27312]
ENSG00000167130.18	255.17	-1.01592	0.23688	3.26852e-06	6.59483e-05	TRUE	57171	ENSG00000167130	protein_coding	9	129081111	129090438	1	DOLPP1	dolichyldiphosphatase 1 [Source:HGNC Symbol;Acc:HGNC:29565]
ENSG00000167136.7	69.7078	-1.74082	0.463797	1.49973e-05	0.000226603	TRUE	2021	ENSG00000167136	protein_coding	9	128818500	128822676	1	ENDOG	endonuclease G [Source:HGNC Symbol;Acc:HGNC:3346]
ENSG00000167157.11	1130.77	-1.34227	0.464717	0.000385865	0.00303388	TRUE	51450	ENSG00000167157	protein_coding	9	129665647	129722674	1	PRRX2	paired related homeobox 2 [Source:HGNC Symbol;Acc:HGNC:21338]
ENSG00000167306.20	6.99143	1.46166	0.548529	0.000640157	0.00450698	TRUE	4645	ENSG00000167306	protein_coding	18	49822789	50195147	-1	MYO5B	myosin VB [Source:HGNC Symbol;Acc:HGNC:7603]
ENSG00000167325.15	2184.42	-1.05873	0.241368	1.99095e-06	4.37122e-05	TRUE	6240	ENSG00000167325	protein_coding	11	4094707	4138932	1	RRM1	ribonucleotide reductase catalytic subunit M1 [Source:HGNC Symbol;Acc:HGNC:10451]
ENSG00000167393.18	64.0573	-1.42349	0.285571	7.86969e-08	3.07396e-06	TRUE	28227	ENSG00000167393	protein_coding	X	333933	386955	-1	PPP2R3B	protein phosphatase 2 regulatory subunit B''beta [Source:HGNC Symbol;Acc:HGNC:13417]
ENSG00000167393.18_PAR_Y	64.0573	-1.42349	0.285571	7.86969e-08	3.07396e-06	TRUE	NA	NA	NA	NA	NA	NA	NA	NA	NA
ENSG00000167508.12	169.706	-1.10863	0.242909	9.18449e-07	2.38231e-05	TRUE	4597	ENSG00000167508	protein_coding	16	88651935	88663161	-1	MVD	mevalonate diphosphate decarboxylase [Source:HGNC Symbol;Acc:HGNC:7529]
ENSG00000167513.9	104.757	-2.61793	0.526774	5.01105e-08	2.08761e-06	TRUE	81620	ENSG00000167513	protein_coding	16	88803789	88809258	1	CDT1	chromatin licensing and DNA replication factor 1 [Source:HGNC Symbol;Acc:HGNC:24576]
ENSG00000167543.16	332.565	-1.53616	0.409558	1.64868e-05	0.000243393	TRUE	90313	ENSG00000167543	protein_coding	17	29566052	29573157	1	TP53I13	tumor protein p53 inducible protein 13 [Source:HGNC Symbol;Acc:HGNC:25102]
ENSG00000167619.13	3.49112	-1.7048	1.64671	0.00937244	0.0371478	TRUE	284339	ENSG00000167619	protein_coding	19	42313309	42325064	1	TMEM145	transmembrane protein 145 [Source:HGNC Symbol;Acc:HGNC:26912]
ENSG00000167642.13	109.673	2.32345	0.75888	9.57829e-05	0.000996685	TRUE	10653	ENSG00000167642	protein_coding	19	38244035	38292615	1	SPINT2	serine peptidase inhibitor, Kunitz type 2 [Source:HGNC Symbol;Acc:HGNC:11247]
ENSG00000167646.14	2.16453	-2.03095	2.18105	0.00435591	0.0204367	TRUE	352909	ENSG00000167646	protein_coding	19	55158661	55166722	-1	DNAAF3	dynein axonemal assembly factor 3 [Source:HGNC Symbol;Acc:HGNC:30492]
ENSG00000167670.16	341.912	-1.28989	0.335004	1.45991e-05	0.000221744	TRUE	10036	ENSG00000167670	protein_coding	19	4402640	4445018	1	CHAF1A	chromatin assembly factor 1 subunit A [Source:HGNC Symbol;Acc:HGNC:1910]
ENSG00000167700.9	90.7305	-1.37599	0.472492	0.000353069	0.00282687	TRUE	113655	ENSG00000167700	protein_coding	8	144509070	144511213	1	MFSD3	major facilitator superfamily domain containing 3 [Source:HGNC Symbol;Acc:HGNC:25157]
ENSG00000167747.16	329.655	-1.60723	0.471079	5.4961e-05	0.000641341	TRUE	84798	ENSG00000167747	transcribed_unitary_pseudogene	19	50797687	50804929	-1	C19orf48	chromosome 19 open reading frame 48 [Source:HGNC Symbol;Acc:HGNC:29667]
ENSG00000167775.11	300.262	-1.25076	0.38386	0.00013467	0.00131066	TRUE	51293	ENSG00000167775	protein_coding	19	8302127	8308358	-1	CD320	CD320 molecule [Source:HGNC Symbol;Acc:HGNC:16692]
ENSG00000167797.8	281.401	-1.03326	0.302284	0.000107109	0.00109246	TRUE	10263	ENSG00000167797	protein_coding	11	67506497	67508649	-1	CDK2AP2	cyclin dependent kinase 2 associated protein 2 [Source:HGNC Symbol;Acc:HGNC:30833]
ENSG00000167799.10	16.2873	-1.78382	0.506105	3.8252e-05	0.000477902	TRUE	254552	ENSG00000167799	protein_coding	11	67627938	67629937	-1	NUDT8	nudix hydrolase 8 [Source:HGNC Symbol;Acc:HGNC:8055]
ENSG00000167900.12	903.884	-1.92522	0.495165	7.36189e-06	0.000126595	TRUE	7083	ENSG00000167900	protein_coding	17	78174091	78187233	-1	TK1	thymidine kinase 1 [Source:HGNC Symbol;Acc:HGNC:11830]
ENSG00000167967.16	195.749	-1.52934	0.385495	7.14287e-06	0.000124212	TRUE	1877	ENSG00000167967	protein_coding	16	2223580	2235742	1	E4F1	E4F transcription factor 1 [Source:HGNC Symbol;Acc:HGNC:3121]
ENSG00000167969.13	189.408	-1.50057	0.306195	1.06669e-07	3.92815e-06	TRUE	1632	ENSG00000167969	protein_coding	16	2239402	2252300	-1	ECI1	enoyl-CoA delta isomerase 1 [Source:HGNC Symbol;Acc:HGNC:2703]
ENSG00000167995.17	93.2443	1.23234	0.437207	0.000502328	0.00372802	TRUE	7439	ENSG00000167995	protein_coding	11	61950063	61965515	1	BEST1	bestrophin 1 [Source:HGNC Symbol;Acc:HGNC:12703]
ENSG00000167996.16	23145	1.05812	0.253691	8.86308e-06	0.000147482	TRUE	2495	ENSG00000167996	protein_coding	11	61959718	61967634	-1	FTH1	ferritin heavy chain 1 [Source:HGNC Symbol;Acc:HGNC:3976]
ENSG00000168005.9	236.483	-1.11125	0.243365	8.40236e-07	2.22682e-05	TRUE	144097	ENSG00000168005	protein_coding	11	63813456	63827716	1	SPINDOC	spindlin interactor and repressor of chromatin binding [Source:HGNC Symbol;Acc:HGNC:25115]
ENSG00000168016.15	551.602	1.47825	0.402526	2.06324e-05	0.000290345	TRUE	9881	ENSG00000168016	protein_coding	3	36826819	36945057	-1	TRANK1	tetratricopeptide repeat and ankyrin repeat containing 1 [Source:HGNC Symbol;Acc:HGNC:29011]
ENSG00000168061.17	112.518	-2.12973	0.370775	7.81373e-10	6.26461e-08	TRUE	29901	ENSG00000168061	protein_coding	11	65040901	65044828	1	SAC3D1	SAC3 domain containing 1 [Source:HGNC Symbol;Acc:HGNC:30179]
ENSG00000168067.12	206.493	-1.11408	0.312788	5.39333e-05	0.000630619	TRUE	5871	ENSG00000168067	protein_coding	11	64784918	64803241	-1	MAP4K2	mitogen-activated protein kinase kinase kinase kinase 2 [Source:HGNC Symbol;Acc:HGNC:6864]
ENSG00000168078.10	518.911	-2.03418	0.561051	1.9251e-05	0.000274493	TRUE	55872	ENSG00000168078	protein_coding	8	27809624	27838082	-1	PBK	PDZ binding kinase [Source:HGNC Symbol;Acc:HGNC:18282]
ENSG00000168140.5	2101.6	-1.15776	0.49408	0.00214935	0.0117253	TRUE	114990	ENSG00000168140	protein_coding	16	4371848	4383538	1	VASN	vasorin [Source:HGNC Symbol;Acc:HGNC:18517]
ENSG00000168216.13	690.038	1.50234	0.188079	1.47821e-16	6.84797e-14	TRUE	55788	ENSG00000168216	protein_coding	6	69672757	69867236	-1	LMBRD1	LMBR1 domain containing 1 [Source:HGNC Symbol;Acc:HGNC:23038]
ENSG00000168268.11	1910.41	-1.02315	0.291773	6.93417e-05	0.000765568	TRUE	64943	ENSG00000168268	protein_coding	3	52524385	52535054	-1	NT5DC2	5'-nucleotidase domain containing 2 [Source:HGNC Symbol;Acc:HGNC:25717]
ENSG00000168273.8	91.7196	-1.08885	0.307751	6.2261e-05	0.000708894	TRUE	440957	ENSG00000168273	protein_coding	3	52534013	52579237	1	SMIM4	small integral membrane protein 4 [Source:HGNC Symbol;Acc:HGNC:37257]
ENSG00000168297.16	844.35	1.10775	0.329919	0.000108042	0.00110004	TRUE	54899	ENSG00000168297	protein_coding	3	58332880	58426127	1	PXK	PX domain containing serine/threonine kinase like [Source:HGNC Symbol;Acc:HGNC:23326]
ENSG00000168300.14	674.761	1.07131	0.218935	1.61133e-07	5.53757e-06	TRUE	115294	ENSG00000168300	protein_coding	8	51817575	51899186	-1	PCMTD1	protein-L-isoaspartate (D-aspartate) O-methyltransferase domain containing 1 [Source:HGNC Symbol;Acc:HGNC:30483]
ENSG00000168386.19	1397.15	1.25676	0.337073	2.20531e-05	0.000306982	TRUE	11259	ENSG00000168386	protein_coding	3	99828811	100114513	-1	FILIP1L	filamin A interacting protein 1 like [Source:HGNC Symbol;Acc:HGNC:24589]
ENSG00000168393.13	481.427	-1.68846	0.396352	1.80358e-06	4.02858e-05	TRUE	1841	ENSG00000168393	protein_coding	2	241675747	241686944	-1	DTYMK	deoxythymidylate kinase [Source:HGNC Symbol;Acc:HGNC:3061]
ENSG00000168476.12	262.183	-1.69185	0.326657	2.09776e-08	1.03826e-06	TRUE	80346	ENSG00000168476	protein_coding	8	22138020	22141951	-1	REEP4	receptor accessory protein 4 [Source:HGNC Symbol;Acc:HGNC:26176]
ENSG00000168496.4	752.462	-1.69506	0.413564	3.56169e-06	7.0633e-05	TRUE	2237	ENSG00000168496	protein_coding	11	61792911	61797238	1	FEN1	flap structure-specific endonuclease 1 [Source:HGNC Symbol;Acc:HGNC:3650]
ENSG00000168517.11	48.532	-1.29982	0.286812	7.53726e-07	2.0348e-05	TRUE	124790	ENSG00000168517	protein_coding	17	45160700	45170040	1	HEXIM2	HEXIM P-TEFb complex subunit 2 [Source:HGNC Symbol;Acc:HGNC:28591]
ENSG00000168589.15	2.60235	1.98392	0.909308	0.00232887	0.0125216	TRUE	83657	ENSG00000168589	protein_coding	16	80540734	80550811	1	DYNLRB2	dynein light chain roadblock-type 2 [Source:HGNC Symbol;Acc:HGNC:15467]
ENSG00000168672.4	36.2287	1.96104	1.10909	0.00231218	0.0124494	TRUE	157638	ENSG00000168672	protein_coding	8	126552443	126558478	-1	LRATD2	LRAT domain containing 2 [Source:HGNC Symbol;Acc:HGNC:24166]
ENSG00000168675.19	117.644	-1.32197	1.72395	0.0110784	0.0421154	TRUE	753	ENSG00000168675	protein_coding	18	13217498	13652755	1	LDLRAD4	low density lipoprotein receptor class A domain containing 4 [Source:HGNC Symbol;Acc:HGNC:1224]
ENSG00000168743.13	5.52791	2.20241	1.31962	0.0017802	0.0101314	TRUE	255743	ENSG00000168743	protein_coding	4	105894775	106004027	1	NPNT	nephronectin [Source:HGNC Symbol;Acc:HGNC:27405]
ENSG00000168916.16	69.0373	1.87655	0.639546	0.000179096	0.00164293	TRUE	57507	ENSG00000168916	protein_coding	5	124636913	124748807	-1	ZNF608	zinc finger protein 608 [Source:HGNC Symbol;Acc:HGNC:29238]
ENSG00000168955.4	20.324	2.67093	1.84591	0.00234672	0.012606	TRUE	79853	ENSG00000168955	protein_coding	2	227362038	227381995	-1	TM4SF20	transmembrane 4 L six family member 20 [Source:HGNC Symbol;Acc:HGNC:26230]
ENSG00000168961.17	8.67135	1.19909	0.929903	0.0116581	0.0438586	TRUE	3965	ENSG00000168961	protein_coding	17	27629798	27649560	1	LGALS9	galectin 9 [Source:HGNC Symbol;Acc:HGNC:6570]
ENSG00000168992.4	2.40633	1.59865	1.38948	0.0106978	0.0410526	TRUE	NA	ENSG00000168992	unprocessed_pseudogene	2	95546531	95547545	1	OR7E102P	olfactory receptor family 7 subfamily E member 102 pseudogene [Source:HGNC Symbol;Acc:HGNC:15043]
ENSG00000169019.11	389.778	1.1789	0.180086	8.81313e-12	1.3887e-09	TRUE	54951	ENSG00000169019	protein_coding	4	47450787	47463702	-1	COMMD8	COMM domain containing 8 [Source:HGNC Symbol;Acc:HGNC:26036]
ENSG00000169136.13	324.026	-1.1919	0.400505	0.000362993	0.00288638	TRUE	22809	ENSG00000169136	protein_coding	19	49928702	49933935	1	ATF5	activating transcription factor 5 [Source:HGNC Symbol;Acc:HGNC:790]
ENSG00000169174.11	31.269	-1.40434	0.643239	0.00226454	0.012244	TRUE	255738	ENSG00000169174	protein_coding	1	55039447	55064852	1	PCSK9	proprotein convertase subtilisin/kexin type 9 [Source:HGNC Symbol;Acc:HGNC:20001]
ENSG00000169218.14	11.7802	2.60272	1.33275	0.00126942	0.00778079	TRUE	284654	ENSG00000169218	protein_coding	1	37611350	37634892	-1	RSPO1	R-spondin 1 [Source:HGNC Symbol;Acc:HGNC:21679]
ENSG00000169258.7	104.989	-1.55562	0.412731	1.54198e-05	0.000231051	TRUE	114787	ENSG00000169258	protein_coding	5	176595802	176610156	-1	GPRIN1	G protein regulated inducer of neurite outgrowth 1 [Source:HGNC Symbol;Acc:HGNC:24835]
ENSG00000169271.3	172.009	1.14054	0.583227	0.00468163	0.0216006	TRUE	8988	ENSG00000169271	protein_coding	5	54455699	54456377	1	HSPB3	heat shock protein family B (small) member 3 [Source:HGNC Symbol;Acc:HGNC:5248]
ENSG00000169291.10	14.1113	2.75991	1.17111	0.00066274	0.00463079	TRUE	126669	ENSG00000169291	protein_coding	1	154469772	154502412	-1	SHE	Src homology 2 domain containing E [Source:HGNC Symbol;Acc:HGNC:27004]
ENSG00000169446.6	681.808	1.11643	0.184023	2.05149e-10	2.09333e-08	TRUE	93380	ENSG00000169446	protein_coding	X	135960588	135974029	-1	MMGT1	membrane magnesium transporter 1 [Source:HGNC Symbol;Acc:HGNC:28100]
ENSG00000169554.23	1854.42	1.02943	0.172924	5.02075e-10	4.38851e-08	TRUE	9839	ENSG00000169554	protein_coding	2	144364364	144521057	-1	ZEB2	zinc finger E-box binding homeobox 2 [Source:HGNC Symbol;Acc:HGNC:14881]
ENSG00000169570.10	62.9931	1.45242	0.23042	2.39697e-11	3.28527e-09	TRUE	285605	ENSG00000169570	protein_coding	5	118836074	118988547	-1	DTWD2	DTW domain containing 2 [Source:HGNC Symbol;Acc:HGNC:19334]
ENSG00000169607.13	564.945	-2.2723	0.512061	6.05258e-07	1.69729e-05	TRUE	150468	ENSG00000169607	protein_coding	2	112736349	112764664	-1	CKAP2L	cytoskeleton associated protein 2 like [Source:HGNC Symbol;Acc:HGNC:26877]
ENSG00000169627.9	201.036	-1.85921	0.356299	1.6019e-08	8.19091e-07	TRUE	654483	ENSG00000169627	protein_coding	16	30192932	30194306	-1	BOLA2B	bolA family member 2B [Source:HGNC Symbol;Acc:HGNC:32479]
ENSG00000169627.9	201.036	-1.85921	0.356299	1.6019e-08	8.19091e-07	TRUE	552900	ENSG00000169627	protein_coding	16	30192932	30194306	-1	BOLA2B	bolA family member 2B [Source:HGNC Symbol;Acc:HGNC:32479]
ENSG00000169679.15	632.655	-1.82477	0.548368	6.23264e-05	0.00070907	TRUE	699	ENSG00000169679	protein_coding	2	110637528	110678063	-1	BUB1	BUB1 mitotic checkpoint serine/threonine kinase [Source:HGNC Symbol;Acc:HGNC:1148]
ENSG00000169683.8	106.069	-1.73029	0.311832	3.08988e-09	1.97709e-07	TRUE	201255	ENSG00000169683	protein_coding	17	82023305	82031151	1	LRRC45	leucine rich repeat containing 45 [Source:HGNC Symbol;Acc:HGNC:28302]
ENSG00000169684.13	7.43725	-1.80406	1.08818	0.004104	0.0195358	TRUE	1138	ENSG00000169684	protein_coding	15	78565520	78595269	1	CHRNA5	cholinergic receptor nicotinic alpha 5 subunit [Source:HGNC Symbol;Acc:HGNC:1959]
ENSG00000169689.15	352.475	-1.58738	0.421288	1.48628e-05	0.000224865	TRUE	201254	ENSG00000169689	protein_coding	17	82018702	82024107	-1	CENPX	centromere protein X [Source:HGNC Symbol;Acc:HGNC:11422]
ENSG00000169696.16	187.227	-1.19216	0.326579	3.59555e-05	0.000453413	TRUE	79058	ENSG00000169696	protein_coding	17	81976807	82017406	1	ASPSCR1	ASPSCR1 tether for SLC2A4, UBX domain containing [Source:HGNC Symbol;Acc:HGNC:13825]
ENSG00000169710.9	1027.25	-1.62955	0.357274	4.70834e-07	1.37354e-05	TRUE	2194	ENSG00000169710	protein_coding	17	82078338	82098294	-1	FASN	fatty acid synthase [Source:HGNC Symbol;Acc:HGNC:3594]
ENSG00000169715.15	826.217	-2.00893	0.373858	6.14728e-09	3.55086e-07	TRUE	4493	ENSG00000169715	protein_coding	16	56625475	56627112	1	MT1E	metallothionein 1E [Source:HGNC Symbol;Acc:HGNC:7397]
ENSG00000169718.18	457.342	-1.03039	0.289701	6.52622e-05	0.000733464	TRUE	64118	ENSG00000169718	protein_coding	17	82057506	82065887	-1	DUS1L	dihydrouridine synthase 1 like [Source:HGNC Symbol;Acc:HGNC:30086]
ENSG00000169727.13	856.618	-1.12546	0.271604	5.27312e-06	9.70095e-05	TRUE	2873	ENSG00000169727	protein_coding	17	82050691	82057470	1	GPS1	G protein pathway suppressor 1 [Source:HGNC Symbol;Acc:HGNC:4549]
ENSG00000169738.8	188.328	-1.2001	0.210115	1.7759e-09	1.24652e-07	TRUE	51181	ENSG00000169738	protein_coding	17	82035136	82037709	-1	DCXR	dicarbonyl and L-xylulose reductase [Source:HGNC Symbol;Acc:HGNC:18985]
ENSG00000169750.9	35.9825	-2.40664	0.371861	9.4124e-12	1.4731e-09	TRUE	5881	ENSG00000169750	protein_coding	17	82031678	82034204	1	RAC3	Rac family small GTPase 3 [Source:HGNC Symbol;Acc:HGNC:9803]
ENSG00000169851.15	187.049	-3.24661	1.26032	0.000324361	0.00264176	TRUE	5099	ENSG00000169851	protein_coding	4	30720415	31146805	1	PCDH7	protocadherin 7 [Source:HGNC Symbol;Acc:HGNC:8659]
ENSG00000169884.14	20.2356	-1.023	0.516125	0.00629879	0.0273168	TRUE	7480	ENSG00000169884	protein_coding	12	48965340	48971735	-1	WNT10B	Wnt family member 10B [Source:HGNC Symbol;Acc:HGNC:12775]
ENSG00000169891.18	13.9137	2.33801	1.12952	0.000673444	0.00468438	TRUE	9185	ENSG00000169891	protein_coding	X	16946658	17153272	1	REPS2	RALBP1 associated Eps domain containing 2 [Source:HGNC Symbol;Acc:HGNC:9963]
ENSG00000169908.12	825.939	-1.14932	0.748247	0.00977861	0.0383252	TRUE	4071	ENSG00000169908	protein_coding	3	149369022	149377692	-1	TM4SF1	transmembrane 4 L six family member 1 [Source:HGNC Symbol;Acc:HGNC:11853]
ENSG00000169933.17	22.6059	1.19045	2.33993	0.00979479	0.0383788	TRUE	9758	ENSG00000169933	protein_coding	X	11822423	12724523	1	FRMPD4	FERM and PDZ domain containing 4 [Source:HGNC Symbol;Acc:HGNC:29007]
ENSG00000169972.12	131.783	-1.6477	0.43363	1.29133e-05	0.000201285	TRUE	126789	ENSG00000169972	protein_coding	1	1308597	1311677	1	PUSL1	pseudouridine synthase like 1 [Source:HGNC Symbol;Acc:HGNC:26914]
ENSG00000169994.20	14.9292	-2.13468	0.485582	8.78412e-07	2.30688e-05	TRUE	4648	ENSG00000169994	protein_coding	2	127535683	127637729	1	MYO7B	myosin VIIB [Source:HGNC Symbol;Acc:HGNC:7607]
ENSG00000170271.11	263.502	1.46769	0.341654	1.57926e-06	3.65439e-05	TRUE	10826	ENSG00000170271	protein_coding	5	154818492	154859252	-1	FAXDC2	fatty acid hydroxylase domain containing 2 [Source:HGNC Symbol;Acc:HGNC:1334]
ENSG00000170312.17	715.85	-1.48323	0.550384	0.000576618	0.00415818	TRUE	983	ENSG00000170312	protein_coding	10	60778331	60794852	1	CDK1	cyclin dependent kinase 1 [Source:HGNC Symbol;Acc:HGNC:1722]
ENSG00000170345.10	473.836	3.62418	1.35076	0.000162313	0.00152336	TRUE	2353	ENSG00000170345	protein_coding	14	75278826	75282230	1	FOS	Fos proto-oncogene, AP-1 transcription factor subunit [Source:HGNC Symbol;Acc:HGNC:3796]
ENSG00000170374.6	4.05297	-4.23592	2.00551	0.000646559	0.00453649	TRUE	121340	ENSG00000170374	protein_coding	12	53326575	53345315	-1	SP7	Sp7 transcription factor [Source:HGNC Symbol;Acc:HGNC:17321]
ENSG00000170385.10	1038.25	1.48564	0.18059	2.14515e-17	1.18305e-14	TRUE	7779	ENSG00000170385	protein_coding	1	211571568	211579161	-1	SLC30A1	solute carrier family 30 member 1 [Source:HGNC Symbol;Acc:HGNC:11012]
ENSG00000170390.16	334.254	-1.43364	0.410468	4.68356e-05	0.000562975	TRUE	166614	ENSG00000170390	protein_coding	4	150078445	150257438	1	DCLK2	doublecortin like kinase 2 [Source:HGNC Symbol;Acc:HGNC:19002]
ENSG00000170421.13	50.2849	-1.34321	0.471497	0.00043927	0.00335871	TRUE	3856	ENSG00000170421	protein_coding	12	52897187	52949954	-1	KRT8	keratin 8 [Source:HGNC Symbol;Acc:HGNC:6446]
ENSG00000170482.17	3.4703	1.69556	0.793379	0.00291628	0.0149183	TRUE	9963	ENSG00000170482	protein_coding	5	139367196	139384553	-1	SLC23A1	solute carrier family 23 member 1 [Source:HGNC Symbol;Acc:HGNC:10974]
ENSG00000170498.10	10.9943	-2.67306	1.56772	0.00214363	0.0117078	TRUE	3814	ENSG00000170498	protein_coding	1	204190341	204196491	-1	KISS1	KiSS-1 metastasis suppressor [Source:HGNC Symbol;Acc:HGNC:6341]
ENSG00000170525.21	1175.62	-1.16821	0.36009	0.000155784	0.00147403	TRUE	5209	ENSG00000170525	protein_coding	10	6144934	6254644	1	PFKFB3	6-phosphofructo-2-kinase/fructose-2,6-biphosphatase 3 [Source:HGNC Symbol;Acc:HGNC:8874]
ENSG00000170542.6	57.8984	1.08708	0.545224	0.00487677	0.0223286	TRUE	5272	ENSG00000170542	protein_coding	6	2887270	2903309	-1	SERPINB9	serpin family B member 9 [Source:HGNC Symbol;Acc:HGNC:8955]
ENSG00000170558.10	3918.41	-1.25591	0.395471	0.000173153	0.00160173	TRUE	1000	ENSG00000170558	protein_coding	18	27932879	28177946	-1	CDH2	cadherin 2 [Source:HGNC Symbol;Acc:HGNC:1759]
ENSG00000170604.5	136.578	-1.24878	0.264419	3.31491e-07	1.03203e-05	TRUE	26145	ENSG00000170604	protein_coding	19	45883608	45886141	-1	IRF2BP1	interferon regulatory factor 2 binding protein 1 [Source:HGNC Symbol;Acc:HGNC:21728]
ENSG00000170629.15	30.6212	-1.12875	0.407543	0.000725369	0.00497387	TRUE	349152	ENSG00000170629	transcribed_unprocessed_pseudogene	7	103175133	103280410	-1	DPY19L2P2	DPY19L2 pseudogene 2 [Source:HGNC Symbol;Acc:HGNC:21764]
ENSG00000170638.10	196.563	-1.51489	0.397806	1.37742e-05	0.000211432	TRUE	80305	ENSG00000170638	protein_coding	22	50185913	50199598	1	TRABD	TraB domain containing [Source:HGNC Symbol;Acc:HGNC:28805]
ENSG00000170684.10	3.20447	-2.19908	0.943189	0.0012701	0.00778121	TRUE	162979	ENSG00000170684	protein_coding	19	45071500	45076478	-1	ZNF296	zinc finger protein 296 [Source:HGNC Symbol;Acc:HGNC:15981]
ENSG00000170779.11	308.395	-1.73712	0.381046	4.55437e-07	1.34044e-05	TRUE	55038	ENSG00000170779	protein_coding	14	105009573	105021083	-1	CDCA4	cell division cycle associated 4 [Source:HGNC Symbol;Acc:HGNC:14625]
ENSG00000170881.5	533.804	1.29929	0.184709	2.53722e-13	6.18628e-11	TRUE	11236	ENSG00000170881	protein_coding	8	124474880	124488618	1	RNF139	ring finger protein 139 [Source:HGNC Symbol;Acc:HGNC:17023]
ENSG00000170891.11	14.5254	1.34227	0.711273	0.00415699	0.0197245	TRUE	54360	ENSG00000170891	protein_coding	4	5014586	5019458	-1	CYTL1	cytokine like 1 [Source:HGNC Symbol;Acc:HGNC:24435]
ENSG00000170955.10	1097.07	-1.26657	0.262263	1.81823e-07	6.12147e-06	TRUE	112464	ENSG00000170955	protein_coding	11	6318946	6320532	-1	CAVIN3	caveolae associated protein 3 [Source:HGNC Symbol;Acc:HGNC:9400]
ENSG00000170962.13	433.491	3.65875	0.705469	8.35006e-09	4.62709e-07	TRUE	80310	ENSG00000170962	protein_coding	11	103907189	104164379	-1	PDGFD	platelet derived growth factor D [Source:HGNC Symbol;Acc:HGNC:30620]
ENSG00000171051.9	18.1482	-1.63635	0.846767	0.00249178	0.0131534	TRUE	2357	ENSG00000171051	protein_coding	19	51745172	51804110	-1	FPR1	formyl peptide receptor 1 [Source:HGNC Symbol;Acc:HGNC:3826]
ENSG00000171150.9	2190.26	1.49595	0.188514	2.21841e-16	1.00755e-13	TRUE	9655	ENSG00000171150	protein_coding	2	46698952	46780245	1	SOCS5	suppressor of cytokine signaling 5 [Source:HGNC Symbol;Acc:HGNC:16852]
ENSG00000171159.5	143.339	-1.43647	0.51302	0.000463445	0.00349439	TRUE	79095	ENSG00000171159	protein_coding	9	128160265	128163924	1	BBLN	bublin coiled coil protein [Source:HGNC Symbol;Acc:HGNC:17823]
ENSG00000171208.10	96.9812	-2.20015	0.681876	6.82139e-05	0.000756723	TRUE	81831	ENSG00000171208	protein_coding	16	47077703	47143945	-1	NETO2	neuropilin and tolloid like 2 [Source:HGNC Symbol;Acc:HGNC:14644]
ENSG00000171222.11	137.496	-2.07479	0.558584	1.39971e-05	0.00021457	TRUE	51282	ENSG00000171222	protein_coding	20	35953617	35959472	-1	SCAND1	SCAN domain containing 1 [Source:HGNC Symbol;Acc:HGNC:10566]
ENSG00000171227.7	5.74425	1.26479	0.640174	0.00441411	0.0206462	TRUE	140738	ENSG00000171227	protein_coding	2	119429901	119438504	1	TMEM37	transmembrane protein 37 [Source:HGNC Symbol;Acc:HGNC:18216]
ENSG00000171241.9	938.176	-1.83233	0.56338	8.01333e-05	0.000864	TRUE	79801	ENSG00000171241	protein_coding	16	46578591	46621379	-1	SHCBP1	SHC binding and spindle associated 1 [Source:HGNC Symbol;Acc:HGNC:29547]
ENSG00000171262.11	666.616	1.26887	0.219928	9.97335e-10	7.64175e-08	TRUE	283742	ENSG00000171262	protein_coding	15	38454127	38487710	1	FAM98B	family with sequence similarity 98 member B [Source:HGNC Symbol;Acc:HGNC:26773]
ENSG00000171320.15	149.486	-1.5908	0.61592	0.000714001	0.00491629	TRUE	157570	ENSG00000171320	protein_coding	8	27771949	27812640	1	ESCO2	establishment of sister chromatid cohesion N-acetyltransferase 2 [Source:HGNC Symbol;Acc:HGNC:27230]
ENSG00000171346.16	14.2585	-1.28057	0.616331	0.00305789	0.0154819	TRUE	3866	ENSG00000171346	protein_coding	17	41513745	41522529	-1	KRT15	keratin 15 [Source:HGNC Symbol;Acc:HGNC:6421]
ENSG00000171368.12	3.67057	-2.60052	0.908699	0.000333444	0.00270338	TRUE	11076	ENSG00000171368	protein_coding	5	659862	693352	-1	TPPP	tubulin polymerization promoting protein [Source:HGNC Symbol;Acc:HGNC:24164]
ENSG00000171443.7	59.0169	-1.29838	0.417469	0.000215765	0.00191625	TRUE	147807	ENSG00000171443	protein_coding	19	55600022	55603138	1	ZNF524	zinc finger protein 524 [Source:HGNC Symbol;Acc:HGNC:28322]
ENSG00000171444.18	186.88	1.04966	0.287206	3.80351e-05	0.000475448	TRUE	4163	ENSG00000171444	protein_coding	5	113022099	113488823	-1	MCC	MCC regulator of WNT signaling pathway [Source:HGNC Symbol;Acc:HGNC:6935]
ENSG00000171451.15	3156.58	1.88559	0.232403	4.03527e-17	2.12429e-14	TRUE	92126	ENSG00000171451	protein_coding	18	67506587	67516720	-1	DSEL	dermatan sulfate epimerase like [Source:HGNC Symbol;Acc:HGNC:18144]
ENSG00000171509.16	11.0317	8.3204	2.86857	4.58371e-08	1.94185e-06	TRUE	59350	ENSG00000171509	protein_coding	4	158315311	158653372	1	RXFP1	relaxin family peptide receptor 1 [Source:HGNC Symbol;Acc:HGNC:19718]
ENSG00000171587.15	5.25821	-5.16059	1.7094	2.28051e-05	0.000315741	TRUE	1826	ENSG00000171587	protein_coding	21	40010999	40847158	-1	DSCAM	DS cell adhesion molecule [Source:HGNC Symbol;Acc:HGNC:3039]
ENSG00000171700.14	108.448	-1.39424	0.312875	9.91533e-07	2.5434e-05	TRUE	10287	ENSG00000171700	protein_coding	20	64073181	64079988	-1	RGS19	regulator of G protein signaling 19 [Source:HGNC Symbol;Acc:HGNC:13735]
ENSG00000171724.3	239.606	-2.61036	1.31518	0.001436	0.00855064	TRUE	57687	ENSG00000171724	protein_coding	16	77788564	77980107	1	VAT1L	vesicle amine transport 1 like [Source:HGNC Symbol;Acc:HGNC:29315]
ENSG00000171848.16	1434.22	-2.19444	0.510587	1.11259e-06	2.78906e-05	TRUE	6241	ENSG00000171848	protein_coding	2	10120698	10211725	1	RRM2	ribonucleotide reductase regulatory subunit M2 [Source:HGNC Symbol;Acc:HGNC:10452]
ENSG00000171951.5	38.2872	-1.4121	0.849372	0.0056607	0.0251137	TRUE	7857	ENSG00000171951	protein_coding	2	223596940	223602361	-1	SCG2	secretogranin II [Source:HGNC Symbol;Acc:HGNC:10575]
ENSG00000172007.7	222.995	1.24148	0.196743	3.59781e-11	4.60262e-09	TRUE	83452	ENSG00000172007	protein_coding	4	139453232	139476609	1	RAB33B	RAB33B, member RAS oncogene family [Source:HGNC Symbol;Acc:HGNC:16075]
ENSG00000172009.15	447.059	-1.36745	0.324315	2.87274e-06	5.96783e-05	TRUE	7064	ENSG00000172009	protein_coding	19	2785503	2815807	1	THOP1	thimet oligopeptidase 1 [Source:HGNC Symbol;Acc:HGNC:11793]
ENSG00000172137.19	43.4574	-3.1944	1.06684	0.000105814	0.00108067	TRUE	794	ENSG00000172137	protein_coding	16	71358713	71390436	1	CALB2	calbindin 2 [Source:HGNC Symbol;Acc:HGNC:1435]
ENSG00000172164.15	337.247	1.39033	0.349484	6.9389e-06	0.00012158	TRUE	6641	ENSG00000172164	protein_coding	8	120535745	120813273	-1	SNTB1	syntrophin beta 1 [Source:HGNC Symbol;Acc:HGNC:11168]
ENSG00000172179.13	4.29376	-1.56553	1.29267	0.00905183	0.0361683	TRUE	5617	ENSG00000172179	protein_coding	6	22287244	22302826	-1	PRL	prolactin [Source:HGNC Symbol;Acc:HGNC:9445]
ENSG00000172244.9	62.2029	-1.00285	0.261873	2.49824e-05	0.000340193	TRUE	375444	ENSG00000172244	protein_coding	5	43486709	43515148	-1	C5orf34	chromosome 5 open reading frame 34 [Source:HGNC Symbol;Acc:HGNC:24738]
ENSG00000172250.17	20.4011	4.95665	0.903905	2.25195e-09	1.52076e-07	TRUE	94009	ENSG00000172250	transcribed_unitary_pseudogene	22	42500553	42512562	1	SERHL	serine hydrolase like (pseudogene) [Source:HGNC Symbol;Acc:HGNC:14408]
[truncated: 1,391 more rows]
